# Supplementary material
Source: publisher figshare collection journal article supplement (https://acs.figshare.com/ndownloader/files/9158761)
Supplement: Supplementary file 1 [file 9158761]

 
data_ncats02 
  
_audit_creation_method            'SHELXL-2016/6' 
_shelx_SHELXL_version_number      '2016/6' 
_chemical_name_systematic         ncats02 
_chemical_name_common             NCGC00481329a 
_chemical_melting_point           ? 
_chemical_formula_moiety          ? 
_chemical_formula_sum 
 'C12 H14 Cl N O2' 
_chemical_formula_weight          239.69 
  
loop_ 
 _atom_type_symbol 
 _atom_type_description 
 _atom_type_scat_dispersion_real 
 _atom_type_scat_dispersion_imag 
 _atom_type_scat_source 
 'C'  'C'   0.0181   0.0091 
 'International Tables Vol C Tables 4.2.6.8 and 6.1.1.4' 
 'H'  'H'   0.0000   0.0000 
 'International Tables Vol C Tables 4.2.6.8 and 6.1.1.4' 
 'N'  'N'   0.0311   0.0180 
 'International Tables Vol C Tables 4.2.6.8 and 6.1.1.4' 
 'O'  'O'   0.0492   0.0322 
 'International Tables Vol C Tables 4.2.6.8 and 6.1.1.4' 
 'Cl'  'Cl'   0.3639   0.7018 
 'International Tables Vol C Tables 4.2.6.8 and 6.1.1.4' 
  
_space_group_crystal_system       orthorhombic 
_space_group_IT_number            19 
_space_group_name_H-M_alt         'P 21 21 21' 
_space_group_name_Hall            'P 2ac 2ab' 

_diffrn_refln_scan_width          2.0 
_diffrn_refln_scan_rate           1 
_space_group.centring_type        primitive 
  
_shelx_space_group_comment 
; 
The symmetry employed for this shelxl refinement is uniquely defined 
by the following loop, which should always be used as a source of 
symmetry information in preference to the above space-group names. 
They are only intended as comments. 
; 
  
loop_ 
 _space_group_symop_operation_xyz 
 'x, y, z' 
 '-x+1/2, -y, z+1/2' 
 '-x, y+1/2, -z+1/2' 
 'x+1/2, -y+1/2, -z' 
  
_cell_length_a                    7.2478(4) 
_cell_length_b                    8.2707(4) 
_cell_length_c                    18.9058(10) 
_cell_angle_alpha                 90 
_cell_angle_beta                  90 
_cell_angle_gamma                 90 
_cell_volume                      1133.30(10) 
_cell_formula_units_Z             4 
_cell_measurement_temperature     100(2) 
_cell_measurement_reflns_used     9711 
_cell_measurement_theta_min       2.34 
_cell_measurement_theta_max       68.35 
  
_exptl_crystal_description        prism 
_exptl_crystal_colour             colorless 
_exptl_crystal_density_meas       ? 
_exptl_crystal_density_method     ? 
_exptl_crystal_density_diffrn     1.405 
_exptl_crystal_F_000              504 
_exptl_transmission_factor_min    ? 
_exptl_transmission_factor_max    ? 
_exptl_crystal_size_max           0.070 
_exptl_crystal_size_mid           0.060 
_exptl_crystal_size_min           0.050 
_exptl_absorpt_coefficient_mu     2.862 
_shelx_estimated_absorpt_T_min    0.825 
_shelx_estimated_absorpt_T_max    0.870 
_exptl_absorpt_correction_type    multi-scan 
_exptl_absorpt_correction_T_min   0.623 
_exptl_absorpt_correction_T_max   0.753 
_exptl_absorpt_process_details    SADABS 
_exptl_absorpt_special_details    ? 
_diffrn_ambient_temperature       100(2) 
_diffrn_radiation_wavelength      1.54178 
_diffrn_radiation_type            CuK\a 
_diffrn_source                    'microfocus rotating anode' 
_diffrn_measurement_device_type   'Bruker APEX-II CCD' 
_diffrn_measurement_method        '\f and \w scans' 
_diffrn_detector_area_resol_mean  8.366 
_diffrn_reflns_number             13849 
_diffrn_reflns_av_unetI/netI      0.0164 
_diffrn_reflns_av_R_equivalents   0.0255 
_diffrn_reflns_limit_h_min        -8 
_diffrn_reflns_limit_h_max        6 
_diffrn_reflns_limit_k_min        -9 
_diffrn_reflns_limit_k_max        9 
_diffrn_reflns_limit_l_min        -22 
_diffrn_reflns_limit_l_max        22 
_diffrn_reflns_theta_min          4.678 
_diffrn_reflns_theta_max          68.479 
_diffrn_reflns_theta_full         67.000 
_diffrn_measured_fraction_theta_max   0.992 
_diffrn_measured_fraction_theta_full  0.996 
_diffrn_reflns_Laue_measured_fraction_max    0.992 
_diffrn_reflns_Laue_measured_fraction_full   0.996 
_diffrn_reflns_point_group_measured_fraction_max   0.990 
_diffrn_reflns_point_group_measured_fraction_full  0.995 
_reflns_number_total              2066 
_reflns_number_gt                 2063 
_reflns_threshold_expression      'I > 2\s(I)' 
_reflns_Friedel_coverage          0.689 
_reflns_Friedel_fraction_max      0.987 
_reflns_Friedel_fraction_full     0.994 
  
_reflns_special_details 
; 
 Reflections were merged by SHELXL according to the crystal 
 class for the calculation of statistics and refinement. 
  
 _reflns_Friedel_fraction is defined as the number of unique 
 Friedel pairs measured divided by the number that would be 
 possible theoretically, ignoring centric projections and 
 systematic absences. 
; 
  
_computing_data_collection        'Bruker APEX2' 
_computing_cell_refinement        'Bruker SAINT' 
_computing_data_reduction         'Bruker SAINT' 
_computing_structure_solution     'SHELXT-2014' 
_computing_structure_refinement   'SHELXL-2016' 
_computing_molecular_graphics     'ORTEP-32' 
_computing_publication_material   'WinGX' 
_refine_special_details           ? 
_refine_ls_structure_factor_coef  Fsqd 
_refine_ls_matrix_type            full 
_refine_ls_weighting_scheme       calc 
_refine_ls_weighting_details 
'w=1/[\s^2^(Fo^2^)+(0.0278P)^2^+0.4350P] where P=(Fo^2^+2Fc^2^)/3' 
_atom_sites_solution_primary      iterative 
_atom_sites_solution_secondary    difmap 
_atom_sites_solution_hydrogens    mixed 
_refine_ls_hydrogen_treatment     constr 
_refine_ls_extinction_method      none 
_refine_ls_extinction_coef        . 
_refine_ls_abs_structure_details 
; 
 Flack x determined using 832 quotients [(I+)-(I-)]/[(I+)+(I-)] 
 (Parsons, Flack and Wagner, Acta Cryst. B69 (2013) 249-259). 
; 
_refine_ls_abs_structure_Flack    0.008(4) 
_chemical_absolute_configuration  ad 
_refine_ls_number_reflns          2066 
_refine_ls_number_parameters      146 
_refine_ls_number_restraints      0 
_refine_ls_R_factor_all           0.0229 
_refine_ls_R_factor_gt            0.0229 
_refine_ls_wR_factor_ref          0.0598 
_refine_ls_wR_factor_gt           0.0597 
_refine_ls_goodness_of_fit_ref    1.099 
_refine_ls_restrained_S_all       1.099 
_refine_ls_shift/su_max           0.000 
_refine_ls_shift/su_mean          0.000 
  
loop_ 
 _atom_site_label 
 _atom_site_type_symbol 
 _atom_site_fract_x 
 _atom_site_fract_y 
 _atom_site_fract_z 
 _atom_site_U_iso_or_equiv 
 _atom_site_adp_type 
 _atom_site_occupancy 
 _atom_site_site_symmetry_order 
 _atom_site_calc_flag 
 _atom_site_refinement_flags_posn 
 _atom_site_refinement_flags_adp 
 _atom_site_refinement_flags_occupancy 
 _atom_site_disorder_assembly 
 _atom_site_disorder_group 
C1 C 0.4115(3) 0.7197(2) 0.36890(10) 0.0127(4) Uani 1 1 d . . . . . 
C2 C 0.2288(3) 0.7460(2) 0.40904(9) 0.0124(4) Uani 1 1 d . . . . . 
C3 C 0.1121(3) 0.8892(3) 0.38470(10) 0.0135(4) Uani 1 1 d . . . . . 
H3 H 0.180510 0.991271 0.395524 0.016 Uiso 1 1 calc R U . . . 
C4 C 0.0806(3) 0.8799(3) 0.30500(10) 0.0192(4) Uani 1 1 d . . . . . 
H4A H 0.008642 0.781500 0.293649 0.023 Uiso 1 1 calc R U . . . 
H4B H 0.008622 0.975041 0.289307 0.023 Uiso 1 1 calc R U . . . 
C5 C 0.2643(3) 0.8753(3) 0.26578(10) 0.0195(4) Uani 1 1 d . . . . . 
H5A H 0.333555 0.975952 0.275649 0.023 Uiso 1 1 calc R U . . . 
H5B H 0.240903 0.870165 0.214241 0.023 Uiso 1 1 calc R U . . . 
C6 C 0.3809(3) 0.7297(3) 0.28792(10) 0.0164(4) Uani 1 1 d . . . . . 
H6A H 0.502327 0.736029 0.264098 0.020 Uiso 1 1 calc R U . . . 
H6B H 0.319232 0.629487 0.271760 0.020 Uiso 1 1 calc R U . . . 
C7 C 0.5005(3) 0.5580(2) 0.39014(9) 0.0120(4) Uani 1 1 d . . . . . 
C8 C 0.6798(3) 0.5570(2) 0.41827(10) 0.0137(4) Uani 1 1 d . . . . . 
H8 H 0.744165 0.656569 0.422607 0.016 Uiso 1 1 calc R U . . . 
C9 C 0.7664(3) 0.4160(2) 0.43995(10) 0.0165(4) Uani 1 1 d . . . . . 
H9 H 0.886986 0.420503 0.459517 0.020 Uiso 1 1 calc R U . . . 
C10 C 0.6779(3) 0.2692(2) 0.43320(11) 0.0188(4) Uani 1 1 d . . . . . 
H10 H 0.736499 0.172399 0.448263 0.023 Uiso 1 1 calc R U . . . 
C11 C 0.5028(3) 0.2648(2) 0.40421(11) 0.0172(4) Uani 1 1 d . . . . . 
H11 H 0.441295 0.164265 0.398407 0.021 Uiso 1 1 calc R U . . . 
C12 C 0.4170(3) 0.4066(3) 0.38365(10) 0.0136(4) Uani 1 1 d . . . . . 
N1 N 0.5173(2) 0.8634(2) 0.38930(9) 0.0163(4) Uani 1 1 d . . . . . 
H1A H 0.548681 0.857162 0.435111 0.020 Uiso 1 1 d R U . . . 
H1B H 0.617375 0.874949 0.362645 0.020 Uiso 1 1 d R U . . . 
O1 O 0.1852(2) 0.66589(16) 0.45998(7) 0.0177(3) Uani 1 1 d . . . . . 
O2 O -0.06099(19) 0.89505(19) 0.41866(7) 0.0171(3) Uani 1 1 d . . . . . 
H2 H -0.045603 0.896134 0.462694 0.026 Uiso 1 1 calc R U . . . 
Cl1 Cl 0.19509(7) 0.38520(6) 0.34799(3) 0.01917(14) Uani 1 1 d . . . . . 
  
loop_ 
 _atom_site_aniso_label 
 _atom_site_aniso_U_11 
 _atom_site_aniso_U_22 
 _atom_site_aniso_U_33 
 _atom_site_aniso_U_23 
 _atom_site_aniso_U_13 
 _atom_site_aniso_U_12 
C1 0.0121(10) 0.0129(10) 0.0130(9) 0.0009(7) -0.0016(7) -0.0008(8) 
C2 0.0147(10) 0.0123(9) 0.0103(9) -0.0029(7) -0.0030(7) -0.0025(8) 
C3 0.0106(9) 0.0147(10) 0.0151(9) 0.0021(8) 0.0002(7) -0.0014(8) 
C4 0.0174(10) 0.0251(11) 0.0152(9) 0.0045(9) -0.0042(8) 0.0046(10) 
C5 0.0218(11) 0.0229(10) 0.0140(9) 0.0059(8) 0.0005(8) 0.0046(9) 
C6 0.0177(10) 0.0194(11) 0.0122(9) 0.0021(8) 0.0013(8) 0.0026(8) 
C7 0.0130(9) 0.0136(9) 0.0092(8) -0.0015(7) 0.0018(7) 0.0008(8) 
C8 0.0132(10) 0.0149(9) 0.0129(8) -0.0022(7) 0.0015(8) 0.0002(8) 
C9 0.0158(10) 0.0196(10) 0.0140(9) -0.0006(7) -0.0006(7) 0.0037(8) 
C10 0.0219(11) 0.0146(10) 0.0198(10) 0.0029(8) 0.0017(9) 0.0056(9) 
C11 0.0211(11) 0.0117(10) 0.0187(10) -0.0009(7) 0.0040(8) -0.0022(8) 
C12 0.0126(9) 0.0180(10) 0.0103(8) -0.0021(8) 0.0012(7) 0.0009(8) 
N1 0.0144(8) 0.0125(9) 0.0220(8) 0.0006(7) -0.0019(7) -0.0019(7) 
O1 0.0224(8) 0.0180(7) 0.0126(6) 0.0018(5) 0.0036(6) 0.0017(6) 
O2 0.0120(7) 0.0211(7) 0.0181(7) 0.0002(6) 0.0021(5) 0.0010(6) 
Cl1 0.0150(2) 0.0183(2) 0.0242(2) -0.00309(19) -0.00381(18) -0.0034(2) 
  
_geom_special_details 
; 
 All esds (except the esd in the dihedral angle between two l.s. planes) 
 are estimated using the full covariance matrix.  The cell esds are taken 
 into account individually in the estimation of esds in distances, angles 
 and torsion angles; correlations between esds in cell parameters are only 
 used when they are defined by crystal symmetry.  An approximate (isotropic) 
 treatment of cell esds is used for estimating esds involving l.s. planes. 
; 
  
loop_ 
 _geom_bond_atom_site_label_1 
 _geom_bond_atom_site_label_2 
 _geom_bond_distance 
 _geom_bond_site_symmetry_2 
 _geom_bond_publ_flag 
C1 N1 1.466(3) . ? 
C1 C7 1.538(3) . ? 
C1 C2 1.542(3) . ? 
C1 C6 1.549(3) . ? 
C2 O1 1.211(2) . ? 
C2 C3 1.526(3) . ? 
C3 O2 1.410(2) . ? 
C3 C4 1.526(3) . ? 
C3 H3 1.0000 . ? 
C4 C5 1.524(3) . ? 
C4 H4A 0.9900 . ? 
C4 H4B 0.9900 . ? 
C5 C6 1.529(3) . ? 
C5 H5A 0.9900 . ? 
C5 H5B 0.9900 . ? 
C6 H6A 0.9900 . ? 
C6 H6B 0.9900 . ? 
C7 C12 1.396(3) . ? 
C7 C8 1.404(3) . ? 
C8 C9 1.386(3) . ? 
C8 H8 0.9500 . ? 
C9 C10 1.379(3) . ? 
C9 H9 0.9500 . ? 
C10 C11 1.383(3) . ? 
C10 H10 0.9500 . ? 
C11 C12 1.383(3) . ? 
C11 H11 0.9500 . ? 
C12 Cl1 1.753(2) . ? 
N1 H1A 0.8969 . ? 
N1 H1B 0.8883 . ? 
O2 H2 0.8400 . ? 
  
loop_ 
 _geom_angle_atom_site_label_1 
 _geom_angle_atom_site_label_2 
 _geom_angle_atom_site_label_3 
 _geom_angle 
 _geom_angle_site_symmetry_1 
 _geom_angle_site_symmetry_3 
 _geom_angle_publ_flag 
N1 C1 C7 114.64(16) . . ? 
N1 C1 C2 101.87(15) . . ? 
C7 C1 C2 110.75(16) . . ? 
N1 C1 C6 106.96(16) . . ? 
C7 C1 C6 111.36(16) . . ? 
C2 C1 C6 110.85(16) . . ? 
O1 C2 C3 121.32(17) . . ? 
O1 C2 C1 122.58(18) . . ? 
C3 C2 C1 115.90(16) . . ? 
O2 C3 C2 112.47(16) . . ? 
O2 C3 C4 108.55(15) . . ? 
C2 C3 C4 109.95(17) . . ? 
O2 C3 H3 108.6 . . ? 
C2 C3 H3 108.6 . . ? 
C4 C3 H3 108.6 . . ? 
C5 C4 C3 110.54(16) . . ? 
C5 C4 H4A 109.5 . . ? 
C3 C4 H4A 109.5 . . ? 
C5 C4 H4B 109.5 . . ? 
C3 C4 H4B 109.5 . . ? 
H4A C4 H4B 108.1 . . ? 
C4 C5 C6 111.66(17) . . ? 
C4 C5 H5A 109.3 . . ? 
C6 C5 H5A 109.3 . . ? 
C4 C5 H5B 109.3 . . ? 
C6 C5 H5B 109.3 . . ? 
H5A C5 H5B 107.9 . . ? 
C5 C6 C1 113.05(17) . . ? 
C5 C6 H6A 109.0 . . ? 
C1 C6 H6A 109.0 . . ? 
C5 C6 H6B 109.0 . . ? 
C1 C6 H6B 109.0 . . ? 
H6A C6 H6B 107.8 . . ? 
C12 C7 C8 115.41(17) . . ? 
C12 C7 C1 125.12(18) . . ? 
C8 C7 C1 119.47(16) . . ? 
C9 C8 C7 122.39(18) . . ? 
C9 C8 H8 118.8 . . ? 
C7 C8 H8 118.8 . . ? 
C10 C9 C8 120.20(18) . . ? 
C10 C9 H9 119.9 . . ? 
C8 C9 H9 119.9 . . ? 
C9 C10 C11 119.11(19) . . ? 
C9 C10 H10 120.4 . . ? 
C11 C10 H10 120.4 . . ? 
C12 C11 C10 120.10(19) . . ? 
C12 C11 H11 119.9 . . ? 
C10 C11 H11 119.9 . . ? 
C11 C12 C7 122.76(19) . . ? 
C11 C12 Cl1 115.77(16) . . ? 
C7 C12 Cl1 121.47(16) . . ? 
C1 N1 H1A 109.9 . . ? 
C1 N1 H1B 111.4 . . ? 
H1A N1 H1B 110.3 . . ? 
C3 O2 H2 109.5 . . ? 
  
_refine_diff_density_max    0.220 
_refine_diff_density_min   -0.183 
_refine_diff_density_rms    0.041 
  
_shelx_res_file 
; 
TITL ncats02_0m_a.res in P2(1)2(1)2(1) 
    shelx.res 
    created by SHELXL-2016/6 at 13:16:19 on 01-Dec-2016 
CELL  1.54178   7.2478   8.2707  18.9058   90.000   90.000   90.000 
ZERR     4.00   0.0004   0.0004   0.0010    0.000    0.000    0.000 
LATT  -1 
SYMM  1/2 - X, - Y, 1/2 + Z 
SYMM  - X, 1/2 + Y, 1/2 - Z 
SYMM  1/2 + X, 1/2 - Y, - Z 
SFAC  C    H    N    O    CL 
UNIT  48 56 4 8 4 
MERG   2 
FMAP   2 
PLAN   20 
SIZE     0.050   0.060   0.070 
ACTA   134.00 
BOND   $H 
LIST   4 
WPDB  -2 
L.S.  10 
TEMP  -173.00 
WGHT    0.027800    0.435000 
FVAR       0.34196 
C1    1    0.411514    0.719730    0.368902    11.00000    0.01212    0.01293 = 
         0.01304    0.00086   -0.00155   -0.00076 
C2    1    0.228774    0.746010    0.409041    11.00000    0.01472    0.01230 = 
         0.01030   -0.00290   -0.00298   -0.00254 
C3    1    0.112134    0.889208    0.384704    11.00000    0.01057    0.01467 = 
         0.01513    0.00207    0.00019   -0.00143 
AFIX  13 
H3    2    0.180510    0.991271    0.395524    11.00000   -1.20000 
AFIX   0 
C4    1    0.080635    0.879861    0.304998    11.00000    0.01741    0.02506 = 
         0.01524    0.00448   -0.00418    0.00455 
AFIX  23 
H4A   2    0.008642    0.781500    0.293649    11.00000   -1.20000 
H4B   2    0.008622    0.975041    0.289307    11.00000   -1.20000 
AFIX   0 
C5    1    0.264289    0.875279    0.265785    11.00000    0.02179    0.02286 = 
         0.01398    0.00587    0.00046    0.00457 
AFIX  23 
H5A   2    0.333555    0.975952    0.275649    11.00000   -1.20000 
H5B   2    0.240903    0.870165    0.214241    11.00000   -1.20000 
AFIX   0 
C6    1    0.380903    0.729699    0.287922    11.00000    0.01769    0.01940 = 
         0.01219    0.00211    0.00127    0.00260 
AFIX  23 
H6A   2    0.502327    0.736029    0.264098    11.00000   -1.20000 
H6B   2    0.319232    0.629487    0.271760    11.00000   -1.20000 
AFIX   0 
C7    1    0.500493    0.557985    0.390136    11.00000    0.01305    0.01361 = 
         0.00920   -0.00151    0.00181    0.00083 
C8    1    0.679830    0.556985    0.418274    11.00000    0.01316    0.01493 = 
         0.01295   -0.00216    0.00147    0.00020 
AFIX  43 
H8    2    0.744165    0.656569    0.422607    11.00000   -1.20000 
AFIX   0 
C9    1    0.766368    0.415989    0.439951    11.00000    0.01576    0.01964 = 
         0.01400   -0.00057   -0.00062    0.00366 
AFIX  43 
H9    2    0.886986    0.420503    0.459517    11.00000   -1.20000 
AFIX   0 
C10   1    0.677934    0.269220    0.433203    11.00000    0.02189    0.01459 = 
         0.01982    0.00292    0.00170    0.00558 
AFIX  43 
H10   2    0.736499    0.172399    0.448263    11.00000   -1.20000 
AFIX   0 
C11   1    0.502782    0.264836    0.404208    11.00000    0.02114    0.01170 = 
         0.01866   -0.00093    0.00401   -0.00223 
AFIX  43 
H11   2    0.441295    0.164265    0.398407    11.00000   -1.20000 
AFIX   0 
C12   1    0.417036    0.406624    0.383652    11.00000    0.01260    0.01800 = 
         0.01025   -0.00208    0.00125    0.00086 
N1    3    0.517314    0.863406    0.389299    11.00000    0.01443    0.01251 = 
         0.02199    0.00055   -0.00187   -0.00190 
AFIX   3 
H1A   2    0.548681    0.857162    0.435111    11.00000   -1.20000 
H1B   2    0.617375    0.874949    0.362645    11.00000   -1.20000 
AFIX   0 
O1    4    0.185157    0.665891    0.459977    11.00000    0.02245    0.01796 = 
         0.01264    0.00184    0.00358    0.00166 
O2    4   -0.060995    0.895050    0.418659    11.00000    0.01200    0.02107 = 
         0.01811    0.00019    0.00213    0.00102 
AFIX 147 
H2    2   -0.045603    0.896134    0.462694    11.00000   -1.50000 
AFIX   0 
CL1   5    0.195089    0.385196    0.347991    11.00000    0.01499    0.01833 = 
         0.02419   -0.00309   -0.00381   -0.00339 
  
HKLF    4 
  
  
  
  
REM  ncats02_0m_a.res in P2(1)2(1)2(1) 
REM R1 =  0.0229 for    2063 Fo > 4sig(Fo)  and  0.0229 for all    2066 data 
REM    146 parameters refined using      0 restraints 
  
END 
  
WGHT      0.0277      0.4372 
  
REM Highest difference peak  0.220,  deepest hole -0.183,  1-sigma level  0.041 
Q1    1   0.1852  0.8266  0.3973  11.00000  0.05    0.22 
Q2    1   0.3113  0.7218  0.3826  11.00000  0.05    0.20 
Q3    1   0.0940  0.8796  0.3457  11.00000  0.05    0.19 
Q4    1   0.1821  0.9561  0.3867  11.00000  0.05    0.17 
Q5    1   0.4580  0.6326  0.3760  11.00000  0.05    0.17 
Q6    1   0.3951  0.7183  0.3331  11.00000  0.05    0.15 
Q7    1   0.4482  0.9597  0.3824  11.00000  0.05    0.13 
Q8    1   0.4984  0.3384  0.3641  11.00000  0.05    0.13 
Q9    1  -0.1976  0.8994  0.3005  11.00000  0.05    0.13 
Q10   1   0.3960  0.4991  0.3242  11.00000  0.05    0.11 
Q11   1   0.1037  0.8371  0.1393  11.00000  0.05    0.11 
Q12   1  -0.2233  0.9063  0.2688  11.00000  0.05    0.11 
Q13   1   0.1635  0.2941  0.3792  11.00000  0.05    0.11 
Q14   1   0.2192  0.2778  0.4441  11.00000  0.05    0.11 
Q15   1   0.2904  1.0536  0.3769  11.00000  0.05    0.11 
Q16   1   0.4574  0.4856  0.3701  11.00000  0.05    0.11 
Q17   1   0.4945  0.4590  0.3555  11.00000  0.05    0.11 
Q18   1   0.3726  0.7603  0.1762  11.00000  0.05    0.11 
Q19   1   0.6240  0.1612  0.5069  11.00000  0.05    0.11 
Q20   1   1.1226  0.3466  0.4618  11.00000  0.05    0.11 
; 
_shelx_res_checksum   23749 
  
_shelx_hkl_file 
; 
  -1   0   0    0.42    0.03 
  -1   0   0    0.53    0.03 
  -2   0   0   80.52    2.73 
   3   0   0    0.14    0.03 
   3   0   0    0.13    0.02 
  -3   0   0    0.10    0.08 
  -4   0   0  117.81    3.97 
  -4   0   0  110.92    3.93 
  -5   0   0    0.18    0.12 
  -5   0   0    0.55    0.10 
  -5   0   0    0.17    0.14 
  -6   0   0    3.86    0.40 
  -7   0   0    0.60    0.25 
  -7   0   0    1.44    0.28 
   0  -1   0    0.28    0.05 
   0  -1   0    0.17    0.05 
   0   1   0    0.18    0.05 
   1  -1   0    3.54    0.19 
   1  -1   0    3.75    0.20 
  -1   1   0    3.44    0.17 
  -1   1   0    3.52    0.15 
  -1  -1   0    3.62    0.15 
   1   1   0    3.60    0.17 
   1  -1   0    3.47    0.19 
   1  -1   0    3.91    0.19 
  -1   1   0    3.61    0.19 
  -1   1   0    3.43    0.19 
  -1   1   0    3.68    0.19 
  -1   1   0    3.73    0.19 
  -1   1   0    3.72    0.19 
   1   1   0    3.90    0.15 
  -1  -1   0    3.59    0.16 
   1   1   0    3.78    0.18 
  -1  -1   0    3.60    0.15 
  -2   1   0   38.61    1.37 
  -2   1   0   38.65    1.37 
   2  -1   0   35.08    1.37 
  -2   1   0   38.83    1.35 
  -2   1   0   38.92    1.37 
  -2  -1   0   38.99    1.35 
   2  -1   0   40.89    1.37 
  -2   1   0   39.01    1.37 
  -2   1   0   40.28    1.31 
  -2   1   0   39.45    1.35 
  -3  -1   0   43.09    1.49 
  -3   1   0   43.68    1.45 
  -3   1   0   41.70    1.51 
   3  -1   0   42.13    1.44 
   3  -1   0   39.25    1.51 
  -3   1   0   41.46    1.40 
  -4  -1   0   20.73    0.81 
   4  -1   0   18.99    0.73 
  -4   1   0   19.24    0.83 
  -4   1   0   20.78    0.85 
  -4  -1   0   19.40    0.84 
  -5  -1   0    1.68    0.14 
  -5  -1   0    2.44    0.27 
  -5   1   0    1.66    0.24 
  -6  -1   0    4.72    0.26 
  -6   1   0    4.53    0.41 
  -6  -1   0    3.96    0.40 
  -7   1   0   68.07    2.58 
  -7   1   0   70.90    2.64 
  -7  -1   0   69.71    2.58 
   0   2   0  228.96    7.56 
   0   2   0  217.54    7.49 
   0   2   0  235.45    7.55 
   0  -2   0  233.40    7.55 
   0   2   0  219.08    7.55 
   0   2   0  219.87    7.55 
   0  -2   0  216.26    7.55 
   0  -2   0  231.82    7.57 
   0  -2   0  228.60    7.56 
   0   2   0  224.79    7.54 
   0   2   0  213.29    7.50 
   0  -2   0  238.28    7.55 
  -1  -2   0  316.18   10.45 
  -1  -2   0  301.39   10.41 
  -1   2   0  307.66   10.47 
   1  -2   0  314.48   10.47 
   1  -2   0  316.93   10.46 
  -1   2   0  314.81   10.45 
   1   2   0  322.32   10.47 
   1   2   0  312.15   10.48 
  -1   2   0  324.20   10.38 
   1  -2   0  327.82   10.46 
  -1  -2   0  313.24   10.44 
   1   2   0  292.39   10.44 
  -1   2   0  318.09   10.47 
   1  -2   0  301.88   10.46 
   1   2   0  329.86   10.45 
   1   2   0  304.39   10.38 
  -1   2   0  305.26   10.46 
  -1   2   0  310.45   10.44 
  -1  -2   0  311.67   10.46 
  -1   2   0  319.66   10.47 
  -2  -2   0    2.10    0.13 
   2   2   0    2.15    0.15 
  -2   2   0    2.24    0.19 
  -2   2   0    1.87    0.12 
  -2   2   0    2.39    0.19 
  -2   2   0    1.78    0.14 
  -2  -2   0    2.07    0.09 
   2  -2   0    1.67    0.18 
   2  -2   0    1.79    0.14 
  -3   2   0  144.10    4.84 
  -3   2   0  144.21    4.83 
   3   2   0  136.59    4.72 
  -3   2   0  145.81    4.80 
   3  -2   0  134.89    4.77 
   3  -2   0  148.90    5.20 
  -3   2   0  140.44    4.74 
   4  -2   0    0.36    0.10 
  -4   2   0    0.33    0.14 
  -5   2   0    5.45    0.41 
   5  -2   0    5.50    0.31 
  -5  -2   0    5.88    0.28 
  -6  -2   0    0.41    0.13 
  -6   2   0    0.45    0.15 
  -6   2   0    0.45    0.23 
  -7   2   0   55.20    1.97 
  -7   2   0   55.59    2.06 
  -7   2   0   55.72    2.12 
  -8   2   0    4.55    0.26 
   0   3   0   -0.02    0.06 
   0  -3   0    0.01    0.09 
   0   3   0    0.05    0.08 
   0  -3   0    0.31    0.12 
  -1   3   0  282.91    8.86 
   1   3   0  268.45    8.74 
  -1   3   0  261.73    8.74 
   1   3   0  262.73    8.85 
  -1   3   0  255.43    8.87 
   1   3   0  264.41    8.76 
  -1  -3   0  253.69    8.84 
  -1  -3   0  256.20    8.82 
  -1   3   0  260.44    8.75 
   2   3   0  138.97    4.74 
  -2  -3   0  147.91    4.75 
   2   3   0  130.15    4.84 
   2  -3   0  139.47    4.77 
  -2   3   0  142.38    4.88 
  -2   3   0  134.87    4.88 
  -2   3   0  150.93    4.76 
  -2  -3   0  152.78    4.71 
  -2  -3   0  144.63    4.81 
  -2   3   0  133.05    4.75 
   3   3   0    0.10    0.06 
   3  -3   0    0.08    0.08 
  -3   3   0    0.31    0.09 
  -3   3   0    0.08    0.05 
  -4   3   0   91.33    3.15 
  -4   3   0   92.54    3.32 
  -4  -3   0   95.85    3.15 
  -4  -3   0   93.20    3.10 
   4  -3   0   93.34    3.23 
  -5  -3   0    3.53    0.21 
   5  -3   0    2.43    0.26 
  -5   3   0    4.28    0.37 
  -5  -3   0    3.41    0.25 
  -6   3   0  105.25    3.68 
  -6   3   0  106.65    3.87 
  -6   3   0  106.15    3.82 
  -6  -3   0  111.37    3.69 
  -6   3   0  115.22    3.94 
  -6   3   0  106.91    3.72 
  -7   3   0   70.22    2.39 
  -7   3   0   63.73    2.25 
  -7   3   0   61.95    2.28 
  -8   3   0    0.27    0.11 
   0  -4   0  685.72   21.77 
   0   4   0  644.53   21.59 
   0   4   0  625.37   21.62 
  -1   4   0  110.36    4.01 
   1   4   0  117.59    4.00 
  -1  -4   0  124.82    4.16 
  -1  -4   0  117.67    3.96 
  -2  -4   0   34.38    1.16 
  -2   4   0   33.46    1.21 
  -2   4   0   33.14    1.22 
   2  -4   0   33.34    1.24 
  -2   4   0   33.16    1.20 
   2   4   0   30.90    1.19 
   2   4   0   31.84    1.21 
  -3  -4   0   20.78    0.78 
  -3  -4   0   20.66    0.77 
   3   4   0   21.83    0.84 
   3  -4   0   22.87    0.89 
  -3   4   0   22.30    0.84 
  -3   4   0   21.26    0.81 
  -4   4   0    7.61    0.36 
  -4   4   0    7.25    0.49 
  -4  -4   0    8.11    0.35 
  -4  -4   0    7.78    0.31 
   4  -4   0    7.37    0.43 
   4   4   0    7.58    0.37 
  -4   4   0    7.55    0.51 
  -5   4   0  155.78    5.75 
  -5  -4   0  174.66    5.58 
   5  -4   0  162.59    5.70 
  -5   4   0  173.24    5.82 
  -5  -4   0  164.39    5.62 
  -6   4   0    6.02    0.31 
  -6   4   0    5.43    0.47 
  -6   4   0    5.67    0.34 
  -6   4   0    5.35    0.39 
  -6  -4   0    5.13    0.29 
  -7   4   0    0.69    0.16 
  -7   4   0    0.50    0.12 
   0   5   0    0.32    0.11 
   0  -5   0    0.13    0.09 
   0   5   0    0.37    0.13 
  -1   5   0    4.50    0.27 
   1   5   0    4.45    0.29 
  -1  -5   0    4.58    0.26 
   1   5   0    4.45    0.27 
   2   5   0   18.42    0.78 
  -2   5   0   19.53    0.77 
   2   5   0   18.00    0.76 
  -2  -5   0   19.24    0.80 
  -2  -5   0   18.32    0.71 
  -2  -5   0   18.34    0.70 
  -2   5   0   19.12    0.77 
  -2   5   0   18.68    0.79 
  -2  -5   0   18.23    0.71 
  -3  -5   0    1.18    0.12 
  -3  -5   0    1.13    0.15 
  -3  -5   0    0.98    0.12 
  -3   5   0    0.75    0.16 
  -3   5   0    0.63    0.16 
   3  -5   0    1.67    0.22 
   3   5   0    0.70    0.15 
  -3   5   0    0.89    0.24 
   4  -5   0   47.24    1.83 
   4   5   0   48.11    1.74 
  -4   5   0   47.26    1.94 
  -4   5   0   48.62    1.91 
  -4  -5   0   48.77    1.68 
  -4  -5   0   47.70    1.65 
  -4  -5   0   47.32    1.72 
  -5   5   0    0.12    0.20 
  -5   5   0    0.14    0.21 
  -5   5   0    0.14    0.13 
  -5  -5   0    0.14    0.13 
  -5   5   0    0.10    0.15 
  -5   5   0    0.13    0.29 
  -5   5   0    0.09    0.14 
  -5   5   0    0.06    0.10 
  -6   5   0   30.03    1.09 
  -6   5   0   30.88    1.09 
  -6  -5   0   26.90    1.05 
  -6   5   0   27.63    1.15 
  -7   5   0  107.50    3.72 
  -7   5   0  113.45    3.74 
   0   6   0  351.11   11.46 
   0  -6   0  334.58   11.47 
   0  -6   0  341.97   11.46 
   1   6   0    0.72    0.17 
  -1  -6   0    0.65    0.16 
  -1  -6   0    0.70    0.16 
  -1   6   0    0.91    0.17 
   1   6   0    0.54    0.16 
   2   6   0    0.25    0.13 
  -2   6   0    0.04    0.29 
  -2  -6   0    0.06    0.10 
  -2   6   0    0.62    0.15 
  -2  -6   0    0.22    0.12 
  -2  -6   0    0.40    0.12 
   2   6   0    0.21    0.14 
  -2  -6   0    0.58    0.18 
  -3  -6   0   67.83    2.28 
  -3   6   0   63.21    2.58 
  -3   6   0   63.89    2.30 
   3   6   0   66.40    2.38 
  -3  -6   0   65.26    2.30 
  -3  -6   0   67.46    2.28 
  -4   6   0    0.96    0.23 
  -4   6   0    1.00    0.29 
  -4   6   0    1.06    0.31 
  -4   6   0    1.14    0.17 
  -4  -6   0    1.44    0.15 
  -4  -6   0    0.85    0.14 
  -4   6   0    0.82    0.17 
  -4   6   0    1.07    0.25 
  -5  -6   0   12.32    0.54 
  -5   6   0   13.51    0.75 
  -5   6   0   13.82    0.57 
  -5   6   0   13.46    0.58 
  -5   6   0   11.98    0.58 
  -5   6   0   13.12    0.63 
  -5   6   0   13.39    0.66 
  -5   6   0   13.58    0.57 
  -6   6   0    6.53    0.39 
  -6   6   0    5.83    0.31 
  -6   6   0    6.26    0.32 
  -6   6   0    6.27    0.33 
   0  -7   0    0.42    0.17 
   0  -7   0    0.39    0.16 
   0   7   0   -0.01    0.13 
   1   7   0   15.13    0.69 
  -1  -7   0   14.30    0.75 
  -1   7   0   15.24    0.70 
  -1  -7   0   13.84    0.68 
  -1  -7   0   15.57    0.58 
  -2   7   0   53.55    1.95 
  -2  -7   0   54.02    1.90 
  -2   7   0   51.41    2.20 
  -2  -7   0   55.81    1.94 
   2   7   0   50.87    1.94 
  -3   7   0   43.93    1.73 
  -3  -7   0   42.22    1.59 
  -3   7   0   44.62    1.62 
  -3  -7   0   43.93    1.58 
  -3   7   0   45.54    2.07 
  -3   7   0   44.07    1.59 
  -3  -7   0   44.07    1.56 
  -3   7   0   45.53    1.93 
   3  -7   0   43.69    1.99 
  -3   7   0   44.38    1.70 
  -4   7   0  102.48    3.74 
  -4   7   0  101.36    3.51 
  -4  -7   0  100.50    3.36 
  -4   7   0  100.36    3.43 
  -4   7   0  101.58    3.53 
   4  -7   0   89.22    3.83 
  -4   7   0  101.45    3.70 
   5  -7   0    2.65    0.47 
  -5   7   0    3.18    0.26 
  -5   7   0    3.21    0.26 
  -5   7   0    3.34    0.23 
  -5   7   0    3.16    0.28 
  -5   7   0    2.70    0.21 
   6  -7   0   58.33    2.24 
  -6   7   0   59.51    2.00 
  -6   7   0   51.88    1.95 
   0  -8   0  208.14    6.91 
   0  -8   0  205.53    6.85 
   0  -8   0  196.16    6.83 
   0  -8   0  210.53    7.29 
   0  -8   0  178.39    6.92 
   0  -8   0  209.00    6.80 
   0   8   0  205.28    7.19 
   0   8   0  203.69    6.89 
   0  -8   0  205.95    6.91 
  -1   8   0   27.84    1.13 
  -1  -8   0   24.30    1.17 
  -1  -8   0   27.75    1.10 
   1   8   0   29.14    1.48 
   1  -8   0   29.28    1.17 
   1  -8   0   27.92    1.22 
   1  -8   0   31.26    1.26 
  -1  -8   0   27.57    1.17 
   1   8   0   24.08    1.13 
  -1  -8   0   29.16    1.14 
   1  -8   0   30.13    1.12 
  -1  -8   0   29.89    1.17 
   2  -8   0    8.84    0.52 
  -2  -8   0    8.90    0.43 
  -2  -8   0    8.94    0.46 
  -2  -8   0    8.30    0.44 
  -2  -8   0    8.57    0.45 
  -2   8   0    7.99    0.52 
  -2  -8   0    8.12    0.49 
  -3   8   0   20.87    1.08 
  -3   8   0   22.82    0.80 
  -3   8   0   21.48    0.95 
  -3   8   0   20.68    1.23 
  -3   8   0   22.17    0.85 
   3  -8   0   21.15    1.04 
  -4   8   0    4.72    0.28 
  -4   8   0    4.02    0.32 
  -4   8   0    3.78    0.29 
   4  -8   0    3.53    0.41 
  -4   8   0    4.16    0.29 
   4  -8   0    4.49    0.44 
   5  -8   0    0.09    0.10 
   5  -8   0    0.17    0.15 
  -5   8   0    0.16    0.10 
  -5   8   0    0.08    0.07 
   0  -9   0    0.18    0.11 
   0  -9   0   -0.02    0.15 
  -1  -9   0   26.91    1.11 
   1  -9   0   32.14    1.53 
  -1  -9   0   26.89    1.04 
   1   9   0   25.73    1.30 
   1  -9   0   25.32    1.11 
  -1  -9   0   28.64    1.07 
   1  -9   0   26.88    1.18 
   2  -9   0    3.33    0.47 
  -2  -9   0    3.21    0.30 
  -2   9   0    3.50    0.30 
  -2   9   0    4.08    0.60 
   2   9   0    3.27    0.41 
  -2  -9   0    2.98    0.20 
  -2  -9   0    3.67    0.25 
   2  -9   0    2.49    0.30 
   3  -9   0    0.63    0.20 
  -3  -9   0    0.41    0.14 
  -3   9   0    0.48    0.16 
   3   9   0    0.39    0.23 
   0   0   1    0.03    0.02 
   0   0  -1    0.11    0.02 
   0   0  -1    0.04    0.02 
   0   0   1    0.08    0.02 
   0   0  -1    0.08    0.02 
   1   0  -1  109.01    3.81 
  -1   0   1  118.34    3.82 
  -1   0   1  112.74    3.81 
   1   0  -1  115.19    3.81 
   1   0   1  112.53    3.82 
   1   0  -1  119.13    3.82 
  -1   0   1  114.05    3.81 
  -2   0   1  210.50    7.08 
  -2   0   1  219.28    7.09 
  -2   0  -1  209.09    7.09 
   3   0  -1  180.35    5.99 
  -3   0  -1  182.82    6.08 
   3   0  -1  165.51    6.02 
   3   0  -1  191.70    6.03 
  -3   0   1  184.38    6.08 
  -4   0   1  614.98   20.85 
  -4   0  -1  641.22   20.84 
  -4   0   1  639.16   20.83 
  -4   0  -1  614.85   20.86 
  -5   0  -1   18.52    0.84 
  -5   0   1   18.65    0.71 
  -5   0   1   19.76    0.87 
  -5   0  -1   18.93    0.87 
  -5   0  -1   18.62    0.71 
  -6   0  -1   48.56    1.96 
  -6   0   1   51.11    1.97 
  -7   0   1   77.01    2.92 
  -7   0   1   76.26    2.87 
  -7   0  -1   81.13    2.94 
  -7   0  -1   78.80    2.88 
  -8   0   1    3.34    0.34 
   0  -1   1  244.64    7.91 
   0  -1   1  238.66    7.90 
   0   1  -1  237.97    7.91 
   0  -1  -1  243.35    7.91 
   0   1  -1  242.01    7.85 
   0   1  -1  238.66    7.90 
   0  -1  -1  245.47    7.90 
   0   1   1  221.93    7.88 
   0   1  -1  229.48    7.89 
   0  -1  -1  240.38    7.90 
   0  -1  -1  248.81    7.90 
   0   1  -1  226.30    7.90 
   0   1   1  226.80    7.89 
   0  -1   1  230.05    7.91 
   0   1  -1  222.17    7.89 
   0  -1  -1  238.24    7.88 
   0   1   1  231.63    7.90 
   0   1   1  235.85    7.90 
   0  -1   1  236.55    7.89 
   0  -1   1  236.63    7.90 
   0   1  -1  250.02    7.91 
   0  -1  -1  242.04    7.90 
   0   1   1  240.62    7.90 
   0  -1   1  229.17    7.90 
   0   1   1  249.88    7.91 
   1  -1   1  305.76    9.91 
  -1   1   1  286.79    9.90 
   1  -1   1  305.25    9.93 
  -1   1   1  276.70    9.96 
   1  -1   1  312.80    9.94 
   1   1  -1  278.04    9.89 
  -1   1   1  305.94    9.92 
   1   1  -1  286.67    9.91 
  -1   1   1  309.89    9.93 
  -1   1   1  311.12    9.86 
  -1   1  -1  301.88    9.65 
  -1   1  -1  276.39    9.60 
   1  -1  -1  299.63    9.63 
   1  -1  -1  289.42    9.62 
  -1   1  -1  281.30    9.62 
  -1   1  -1  304.02    9.58 
  -1   1  -1  264.12    9.54 
   1  -1  -1  288.57    9.62 
  -1   1  -1  299.78    9.64 
   1  -1  -1  283.32    9.61 
  -2   1   1   49.05    1.61 
   2  -1   1   48.87    1.66 
  -2   1   1   45.38    1.59 
   2   1  -1   44.64    1.60 
  -2  -1  -1   47.43    1.65 
  -2   1   1   48.59    1.67 
  -2   1   1   47.01    1.66 
  -2   1   1   49.25    1.66 
  -2   1   1   50.00    1.67 
   2   1  -1   50.75    1.60 
   2  -1   1   46.11    1.67 
  -2   1   1   46.24    1.65 
  -2   1   1   48.76    1.59 
  -2   1  -1   57.45    1.97 
  -2   1  -1   58.96    1.92 
   2  -1  -1   58.02    1.98 
  -2   1  -1   57.35    1.97 
  -2   1  -1   57.20    1.95 
   2  -1  -1   55.75    1.99 
  -2   1  -1   57.46    1.95 
  -2   1  -1   57.14    1.97 
  -2  -1   1   56.28    1.95 
  -3   1   1   66.74    2.30 
   3  -1   1   67.14    2.33 
   3  -1   1   63.82    2.32 
   3  -1   1   64.67    2.24 
   3   1  -1   68.48    2.24 
  -3   1   1   67.33    2.29 
  -3   1   1   67.60    2.22 
  -3   1   1   68.52    2.33 
  -3  -1  -1   65.15    2.30 
  -3   1  -1   65.58    2.30 
  -3   1  -1   68.95    2.26 
  -3   1  -1   69.75    2.38 
  -3   1  -1   69.89    2.30 
   3  -1  -1   65.04    2.39 
  -3  -1   1   69.67    2.35 
   3  -1  -1   67.91    2.30 
  -4   1   1  189.51    6.24 
  -4  -1  -1  183.97    6.24 
   4  -1   1  191.23    6.10 
  -4   1   1  178.33    6.21 
  -4  -1  -1  172.67    6.19 
  -4  -1   1  184.10    6.34 
  -4   1  -1  183.08    6.33 
   4  -1  -1  191.90    6.23 
  -4   1  -1  187.06    6.35 
  -5   1   1   77.10    2.79 
  -5  -1  -1   76.13    2.61 
  -5  -1  -1   76.80    2.79 
  -5  -1   1   77.63    2.60 
   5  -1  -1   75.17    2.62 
  -5  -1   1   78.11    2.78 
  -5   1  -1   76.50    2.76 
  -5   1  -1   73.68    2.77 
  -6  -1  -1   73.66    2.52 
  -6   1   1   70.86    2.73 
  -6  -1  -1   74.61    2.75 
  -6  -1   1   71.28    2.48 
  -6   1  -1   73.71    2.72 
  -6  -1   1   71.63    2.71 
  -7   1   1   68.88    2.45 
  -7  -1  -1   64.33    2.43 
  -7   1   1   60.00    2.49 
  -7   1   1   65.07    2.35 
  -7   1  -1   70.77    2.59 
  -7   1  -1   74.53    2.69 
  -7  -1   1   64.38    2.55 
  -7   1  -1   69.23    2.44 
  -8   1   1    2.26    0.29 
   1  -2   1  124.15    4.16 
   1  -2   1  131.69    4.18 
  -1   2   1  123.54    4.18 
   1  -2   1  118.00    4.17 
   1   2  -1  117.93    4.13 
  -1   2   1  122.03    4.15 
   1   2  -1  114.51    4.12 
   1   2  -1  120.65    4.09 
  -1   2   1  121.16    4.14 
  -1   2   1  123.28    4.08 
  -1  -2  -1  122.21    4.12 
  -1  -2  -1  121.09    4.11 
  -1  -2  -1  126.78    4.06 
  -1  -2  -1  119.84    4.11 
  -1   2   1  121.45    4.15 
  -1   2   1  127.41    4.19 
   1  -2   1  121.04    4.17 
  -1  -2  -1  117.62    4.12 
   1   2   1   98.58    3.42 
  -1   2  -1  105.11    3.47 
  -1  -2   1   98.59    3.44 
   1   2   1  101.57    3.38 
  -1   2  -1  101.00    3.47 
  -1  -2   1   95.38    3.43 
   1  -2  -1  104.01    3.48 
   1   2   1  100.11    3.42 
   1   2   1  104.03    3.44 
  -1  -2   1  102.41    3.43 
  -1   2  -1   98.07    3.44 
  -1   2  -1   94.35    3.49 
   1  -2  -1  100.36    3.47 
   1  -2  -1  100.51    3.47 
  -1   2  -1  101.06    3.39 
  -1   2  -1  100.36    3.38 
  -1   2  -1  100.85    3.49 
  -1  -2   1  103.54    3.43 
   1  -2  -1  106.22    3.48 
  -1   2  -1  102.16    3.42 
  -2   2   1   41.24    1.52 
  -2  -2  -1   40.29    1.38 
   2  -2   1   41.39    1.54 
   2  -2   1   42.76    1.44 
   2   2  -1   38.64    1.46 
  -2   2   1   42.20    1.51 
  -2   2   1   40.88    1.42 
  -2   2   1   43.18    1.51 
  -2  -2  -1   39.60    1.41 
   2   2  -1   41.89    1.47 
  -2   2   1   42.97    1.43 
   2  -2  -1   32.66    1.20 
  -2   2  -1   35.06    1.27 
   2  -2  -1   34.55    1.32 
  -2   2  -1   34.46    1.19 
  -2   2  -1   34.20    1.28 
   2   2   1   33.73    1.21 
  -2  -2   1   34.07    1.21 
  -2   2  -1   32.83    1.18 
  -2   2  -1   35.75    1.23 
   2   2   1   35.80    1.22 
   3  -2   1   10.54    0.44 
   3  -2   1    9.99    0.55 
  -3   2   1   10.80    0.41 
   3   2  -1   10.75    0.40 
  -3  -2  -1   11.93    0.45 
  -3   2   1   10.92    0.51 
   3   2  -1   10.20    0.46 
  -3   2   1   10.97    0.48 
  -3   2  -1   11.69    0.50 
  -3   2  -1   10.46    0.41 
  -3   2  -1   11.05    0.46 
   3  -2  -1   10.19    0.44 
  -4  -2  -1   28.83    1.01 
  -4   2   1   27.18    1.14 
  -4   2   1   28.98    0.97 
   4  -2   1   27.36    1.03 
  -4   2  -1   25.22    1.08 
  -4   2  -1   27.35    1.07 
   4  -2  -1   26.78    0.99 
   5  -2   1   44.17    1.58 
  -5  -2  -1   43.34    1.54 
  -5   2   1   44.30    1.72 
  -5  -2   1   44.06    1.48 
   5  -2  -1   38.46    1.52 
  -5   2  -1   43.11    1.66 
  -6  -2  -1   24.41    0.89 
  -6   2   1   23.45    0.93 
  -6   2   1   23.15    1.10 
   6  -2  -1   22.38    1.10 
  -6  -2   1   27.67    0.97 
  -6   2  -1   25.58    1.01 
  -6   2  -1   28.71    1.21 
  -7   2   1    1.20    0.17 
  -7   2   1    0.99    0.24 
  -7   2  -1    0.55    0.22 
  -7   2  -1    0.67    0.14 
  -8   2   1   21.74    0.93 
  -8   2  -1   21.60    0.81 
   0   3   1   32.59    1.26 
   0  -3  -1   34.85    1.30 
   0  -3  -1   32.85    1.28 
   0  -3   1   32.25    1.29 
   0  -3  -1   33.31    1.17 
   0   3  -1   32.75    1.21 
   0  -3   1   34.50    1.30 
   0   3   1   32.33    1.20 
  -1   3   1  221.71    7.52 
  -1   3   1  218.38    7.63 
  -1   3   1  236.62    7.63 
   1   3  -1  218.85    7.51 
  -1   3   1  215.58    7.50 
  -1  -3  -1  235.18    7.59 
   1   3  -1  224.89    7.53 
  -1  -3  -1  229.88    7.61 
  -1  -3  -1  227.64    7.48 
  -1   3  -1  222.06    7.37 
  -1   3  -1  210.86    7.31 
  -1  -3   1  222.54    7.42 
  -1  -3   1  226.60    7.41 
  -1   3  -1  221.41    7.32 
   1   3   1  220.82    7.43 
  -1   3  -1  224.46    7.44 
   1   3   1  206.93    7.31 
   2   3  -1  368.80   12.32 
  -2   3   1  366.35   12.34 
  -2  -3  -1  362.27   12.29 
  -2  -3  -1  371.50   12.35 
  -2   3   1  382.55   12.48 
   2  -3   1  371.91   12.36 
  -2  -3  -1  381.87   12.40 
   2   3  -1  352.92   12.43 
  -2   3   1  376.27   12.48 
  -2  -3  -1  371.29   12.33 
  -2   3   1  385.53   12.34 
  -2  -3   1  350.33   11.42 
  -2   3  -1  373.17   11.37 
  -2   3  -1  329.18   11.50 
   2   3   1  332.20   11.35 
   2   3   1  326.47   11.46 
  -2   3  -1  357.46   11.51 
   2  -3  -1  331.43   11.38 
  -2  -3   1  336.64   11.37 
  -2   3  -1  344.05   11.36 
   3   3  -1   41.06    1.51 
  -3   3   1   43.50    1.52 
   3  -3   1   44.53    1.56 
  -3   3   1   44.25    1.49 
  -3   3  -1   35.19    1.25 
   3  -3  -1   34.75    1.29 
  -3   3  -1   36.01    1.21 
   3   3   1   34.94    1.24 
  -4  -3  -1   79.98    2.63 
  -4  -3  -1   75.48    2.68 
  -4   3   1   84.29    2.87 
  -4  -3  -1   69.07    2.72 
   4  -3   1   82.79    2.76 
   4   3  -1   82.46    2.77 
  -4   3   1   79.22    2.69 
  -4  -3   1   79.80    2.78 
  -4  -3   1   81.87    2.82 
  -4   3  -1   85.85    3.00 
  -4   3  -1   84.37    2.81 
   4  -3  -1   84.09    2.91 
  -5  -3  -1  124.09    4.12 
  -5   3   1  126.27    4.34 
  -5  -3  -1  117.31    4.15 
   5  -3   1  120.25    4.20 
  -5  -3   1  124.94    4.25 
  -5   3  -1  128.52    4.47 
  -5  -3   1  120.91    4.29 
   5  -3  -1  128.85    4.34 
  -6   3   1   82.52    2.79 
  -6  -3  -1   80.55    2.77 
  -6   3   1   81.11    2.82 
  -6   3   1   79.96    3.00 
  -6   3   1   80.80    2.91 
  -6   3   1   80.38    2.96 
  -6  -3   1   72.59    2.39 
  -6   3  -1   68.93    2.42 
  -6   3  -1   67.29    2.51 
  -6   3  -1   67.18    2.38 
  -6   3  -1   64.81    2.53 
  -6   3  -1   72.72    2.63 
  -7   3   1   38.06    1.41 
  -7   3   1   40.44    1.52 
  -7   3   1   37.37    1.34 
  -7   3   1   38.22    1.48 
  -7   3  -1   33.21    1.25 
  -7   3  -1   34.68    1.33 
  -7  -3   1   33.21    1.22 
  -7   3  -1   34.01    1.37 
  -8   3   1    3.32    0.22 
  -8   3  -1    2.97    0.21 
   0  -4  -1   73.11    2.66 
   0   4  -1   70.57    2.50 
   0   4   1   71.25    2.50 
   0   4  -1   68.89    2.54 
   0  -4  -1   71.25    2.48 
   0  -4   1   77.62    2.77 
  -1  -4  -1  242.13    8.09 
  -1   4   1  242.71    8.15 
  -1  -4  -1  244.91    8.27 
   1   4  -1  242.50    8.13 
  -1   4  -1  246.09    8.27 
  -1  -4   1  249.95    8.41 
   1   4   1  240.13    8.25 
  -1   4  -1  251.71    8.33 
  -2   4   1   30.56    1.11 
   2  -4   1   29.86    1.12 
  -2  -4  -1   28.18    1.03 
  -2   4   1   28.83    1.09 
  -2  -4  -1   29.00    1.11 
   2   4  -1   27.78    1.08 
  -2   4   1   29.40    1.08 
   2   4  -1   30.57    1.10 
  -2   4  -1   30.99    1.16 
  -2  -4   1   33.81    1.12 
   2  -4  -1   30.44    1.19 
  -2   4  -1   31.49    1.17 
  -2   4  -1   30.75    1.15 
   2   4   1   31.69    1.16 
  -3  -4  -1  112.48    3.73 
  -3   4   1  109.06    3.79 
   3  -4   1  114.39    3.84 
  -3  -4  -1  109.21    3.74 
  -3   4   1  110.94    3.77 
   3   4  -1  111.19    3.79 
   3  -4  -1  115.72    4.00 
  -3   4  -1  115.00    3.90 
  -3  -4   1  112.24    3.89 
  -3  -4   1  114.32    3.88 
   3   4   1  119.86    3.94 
  -3   4  -1  117.32    3.94 
   4   4  -1   46.77    1.65 
   4  -4   1   47.54    1.72 
  -4  -4  -1   45.88    1.61 
  -4  -4  -1   45.72    1.57 
  -4   4   1   44.46    1.83 
  -4   4   1   44.90    1.80 
  -4   4   1   46.68    1.64 
  -4   4  -1   35.67    1.31 
  -4   4  -1   36.62    1.49 
  -4   4  -1   34.30    1.47 
   4  -4  -1   37.73    1.42 
  -4  -4   1   37.71    1.30 
  -4  -4   1   35.67    1.25 
   4   4   1   37.24    1.32 
  -5  -4  -1   19.45    0.78 
  -5  -4  -1   20.09    0.74 
   5  -4   1   17.61    0.82 
  -5   4   1   19.66    0.94 
  -5   4   1   18.34    0.90 
  -5   4  -1   29.18    1.30 
  -5   4  -1   30.54    1.32 
   5  -4  -1   30.33    1.23 
  -5  -4   1   30.71    1.11 
  -6  -4  -1   19.21    0.75 
  -6   4   1   20.20    0.88 
  -6   4   1   19.39    0.97 
  -6   4   1   19.74    0.80 
  -6   4   1   19.31    0.77 
  -6   4  -1   26.14    1.18 
  -6   4  -1   24.72    0.97 
  -6  -4   1   26.34    0.97 
  -6   4  -1   25.91    1.00 
  -6   4  -1   25.90    1.08 
  -7   4   1   26.40    1.07 
  -7   4   1   26.35    1.00 
  -7   4   1   26.60    0.96 
  -7   4  -1   29.07    1.12 
  -7   4  -1   31.65    1.09 
   0  -5  -1   10.07    0.47 
   0   5  -1   10.55    0.54 
   0   5  -1   10.61    0.47 
   0   5  -1    9.78    0.65 
   0   5   1   10.33    0.47 
   0   5   1   10.15    0.50 
   1   5  -1   24.91    0.99 
   1   5  -1   26.76    1.02 
  -1   5   1   26.21    1.00 
  -1  -5  -1   25.60    0.97 
  -1   5  -1   19.71    0.80 
   1   5   1   20.86    0.82 
   1   5   1   20.59    0.84 
  -1  -5   1   20.89    0.80 
  -2  -5  -1   25.82    0.98 
  -2   5   1   26.51    1.03 
   2   5  -1   26.72    1.03 
  -2  -5  -1   28.04    0.98 
   2   5  -1   26.21    1.05 
  -2  -5  -1   28.12    1.08 
  -2   5   1   25.56    1.04 
  -2  -5  -1   28.46    1.05 
  -2   5   1   25.51    1.05 
   2   5   1   30.34    1.14 
  -2   5  -1   30.45    1.14 
   2   5   1   30.57    1.16 
  -2  -5   1   28.72    1.08 
  -2   5  -1   30.22    1.16 
  -2  -5   1   29.09    1.07 
  -2  -5   1   28.75    1.09 
  -2  -5   1   32.03    1.16 
  -2   5  -1   30.83    1.17 
  -3   5   1   14.62    0.81 
   3   5  -1   15.24    0.66 
  -3  -5  -1   15.10    0.58 
  -3   5   1   14.62    0.62 
  -3   5   1   14.44    0.65 
   3  -5   1   15.83    0.72 
  -3   5  -1   17.01    0.71 
  -3  -5   1   16.97    0.64 
  -3  -5   1   16.50    0.66 
   3  -5  -1   16.61    0.78 
  -3   5  -1   16.66    0.67 
  -3  -5   1   17.12    0.64 
  -3   5  -1   14.77    0.84 
   3   5   1   17.05    0.71 
  -4   5   1   45.57    1.82 
   4  -5   1   45.85    1.74 
  -4  -5  -1   43.30    1.63 
  -4  -5  -1   46.57    1.59 
  -4   5   1   43.35    1.86 
   4   5  -1   45.94    1.66 
  -4  -5  -1   45.59    1.56 
   4  -5  -1   42.37    1.68 
  -4  -5   1   43.53    1.56 
  -4   5  -1   41.18    1.76 
  -4  -5   1   44.54    1.53 
   4   5   1   41.30    1.57 
  -4  -5   1   43.84    1.50 
  -4   5  -1   44.81    1.76 
  -5   5   1   60.62    2.12 
  -5  -5  -1   61.18    2.08 
  -5   5   1   57.27    2.29 
  -5   5   1   60.56    2.13 
  -5   5   1   59.56    2.21 
  -5   5   1   60.93    2.33 
  -5   5   1   61.39    2.12 
  -5   5   1   56.55    2.11 
  -5   5   1   60.16    2.19 
  -5  -5  -1   59.54    2.13 
  -5   5  -1   59.24    2.29 
  -5   5  -1   57.42    2.20 
  -5   5  -1   60.25    2.12 
  -5   5  -1   59.29    2.09 
  -5  -5   1   60.68    2.07 
  -5   5  -1   59.27    2.18 
  -5   5  -1   59.82    2.10 
  -5   5  -1   59.62    2.31 
  -6   5   1   26.76    1.11 
  -6   5   1   28.35    1.05 
  -6  -5  -1   27.30    1.02 
  -6   5   1   28.48    1.13 
  -6   5   1   28.13    1.06 
  -6   5  -1   32.57    1.17 
  -6  -5   1   30.13    1.13 
  -6   5  -1   30.23    1.23 
  -6   5  -1   31.56    1.16 
  -7   5   1    0.97    0.13 
  -7   5   1    1.07    0.16 
  -7   5  -1    2.25    0.19 
  -7   5  -1    2.43    0.19 
   0  -6  -1  419.68   14.27 
   0  -6   1  439.83   14.27 
   0   6  -1  432.37   14.25 
   0  -6  -1  406.31   14.25 
   0   6   1  426.29   14.25 
   0  -6   1  439.62   14.26 
  -1   6   1   43.98    1.63 
  -1  -6  -1   44.07    1.60 
  -1  -6  -1   43.36    1.62 
  -1  -6  -1   43.59    1.54 
  -1  -6  -1   42.82    1.68 
   1   6  -1   43.39    1.62 
   1   6  -1   44.33    1.66 
  -1  -6   1   51.18    1.76 
  -1  -6   1   48.84    1.71 
  -1  -6   1   48.42    1.69 
   1   6   1   48.97    1.83 
   1   6   1   46.67    1.77 
  -1  -6   1   46.66    1.77 
  -1   6  -1   48.53    1.77 
  -2  -6  -1   14.46    0.72 
  -2   6   1   14.37    0.65 
   2   6  -1   13.17    0.64 
  -2   6   1   14.78    0.84 
  -2  -6  -1   14.02    0.60 
  -2  -6  -1   15.17    0.59 
   2   6  -1   14.75    0.68 
  -2  -6  -1   14.96    0.64 
  -2   6  -1    9.62    0.48 
  -2  -6   1    9.24    0.48 
   2   6   1   10.23    0.53 
  -2  -6   1   10.24    0.44 
  -2  -6   1    9.24    0.44 
  -2  -6   1    9.70    0.53 
  -2  -6   1    9.78    0.42 
   2   6   1    9.65    0.48 
  -2   6  -1    8.94    0.64 
  -3  -6  -1    5.16    0.28 
  -3  -6  -1    4.65    0.29 
  -3   6   1    4.47    0.31 
   3   6  -1    4.77    0.33 
  -3   6   1    4.28    0.47 
  -3   6  -1    3.93    0.28 
  -3  -6   1    4.08    0.27 
  -3   6  -1    4.66    0.46 
  -3  -6   1    4.33    0.26 
  -3  -6   1    4.19    0.24 
  -4   6   1   19.06    0.75 
  -4   6   1   17.50    0.84 
  -4  -6  -1   18.26    0.69 
  -4   6   1   18.10    0.98 
  -4   6   1   17.86    0.76 
  -4   6   1   18.61    0.86 
  -4   6   1   18.99    0.94 
  -4  -6  -1   19.03    0.81 
  -4   6  -1   20.85    1.06 
  -4   6  -1   20.58    0.99 
  -4   6  -1   19.39    0.89 
  -4   6  -1   20.97    0.91 
  -4  -6   1   19.90    0.76 
  -4   6  -1   20.47    0.83 
  -4   6  -1   20.22    0.91 
  -4  -6   1   19.69    0.78 
  -5   6   1    8.39    0.43 
  -5   6   1    9.86    0.52 
  -5   6   1    7.76    0.56 
  -5   6   1    7.50    0.45 
  -5   6   1    8.22    0.42 
  -5   6   1    8.18    0.41 
  -5   6   1    8.02    0.41 
  -5   6  -1    6.96    0.41 
  -5   6  -1    7.54    0.45 
  -5   6  -1    6.60    0.50 
  -5  -6   1    6.46    0.33 
  -5   6  -1    6.53    0.36 
  -5   6  -1    6.93    0.36 
  -5   6  -1    6.20    0.35 
  -5   6  -1    6.51    0.38 
  -6   6   1    3.10    0.22 
  -6   6   1    3.32    0.24 
  -6   6   1    3.03    0.27 
  -6   6   1    3.00    0.22 
  -6   6  -1    3.37    0.28 
  -6   6  -1    3.15    0.21 
  -6   6  -1    3.18    0.23 
  -6   6  -1    2.55    0.23 
   0  -7   1   36.05    1.42 
   0   7  -1   37.73    1.40 
   0  -7  -1   34.11    1.36 
   0  -7  -1   37.53    1.43 
   0   7   1   37.42    1.42 
   0  -7  -1   35.03    1.48 
  -1  -7  -1   82.65    2.97 
  -1   7   1   85.22    2.98 
  -1  -7  -1   83.99    2.84 
   1   7  -1   83.76    2.97 
  -1  -7   1   65.82    2.36 
  -1  -7   1   66.00    2.24 
   1  -7  -1   66.65    2.45 
   1   7   1   66.55    2.37 
  -1  -7   1   59.01    2.43 
  -1   7  -1   67.51    2.37 
  -2  -7  -1   36.13    1.38 
  -2  -7  -1   38.92    1.49 
  -2   7   1   37.82    1.41 
  -2  -7  -1   38.53    1.35 
   2   7  -1   36.61    1.40 
   2  -7   1   29.12    1.46 
   2  -7   1   37.26    2.03 
  -2   7  -1   39.58    1.48 
  -2  -7   1   39.71    1.47 
  -2  -7   1   36.70    1.51 
  -2   7  -1   37.89    1.57 
  -2  -7   1   40.02    1.42 
   2   7   1   37.45    1.47 
   2  -7  -1   40.33    1.95 
  -2   7  -1   37.75    1.70 
   3  -7   1    5.19    0.59 
  -3   7   1    5.74    0.44 
  -3   7   1    5.47    0.38 
  -3   7   1    5.24    0.33 
  -3   7   1    4.92    0.52 
  -3   7   1    5.38    0.64 
  -3   7   1    5.41    0.32 
  -3  -7  -1    4.97    0.27 
  -3  -7  -1    5.27    0.30 
  -3  -7  -1    5.20    0.34 
   3  -7  -1    5.58    0.61 
  -3  -7   1    5.51    0.30 
  -3   7  -1    5.37    0.39 
  -3   7  -1    5.33    0.33 
  -3   7  -1    5.03    0.57 
  -3  -7   1    5.71    0.31 
  -3   7  -1    5.62    0.42 
  -3   7  -1    5.39    0.32 
  -3   7  -1    5.93    0.54 
  -3  -7   1    5.44    0.33 
  -4   7   1    6.56    0.37 
   4  -7   1    6.95    0.66 
  -4  -7  -1    5.91    0.30 
  -4   7   1    6.66    0.43 
  -4   7   1    7.11    0.59 
  -4   7  -1    5.40    0.37 
  -4   7  -1    4.70    0.38 
  -4   7  -1    5.75    0.39 
  -4   7  -1    6.96    0.55 
  -4   7  -1    5.79    0.34 
   4  -7  -1    5.13    0.59 
  -4  -7   1    4.74    0.26 
  -5   7   1   22.86    0.89 
  -5   7   1   18.07    0.80 
  -5   7   1   20.71    0.82 
  -5   7   1   22.30    0.89 
  -5   7   1   20.95    0.80 
   5  -7   1   21.51    1.15 
  -5   7  -1   24.26    0.85 
  -5   7  -1   21.79    0.85 
  -5   7  -1   18.97    0.87 
  -5   7  -1   23.02    0.91 
   5  -7  -1   21.94    1.21 
  -6   7   1   49.49    1.80 
   6  -7   1   52.07    2.09 
  -6   7   1   54.24    1.86 
  -6   7   1   54.06    1.82 
  -6   7  -1   53.77    1.91 
   6  -7  -1   48.92    2.10 
  -6   7  -1   59.46    1.88 
   0  -8   1   28.13    1.21 
   0  -8   1   29.48    1.18 
   0  -8  -1   30.96    1.29 
   0  -8  -1   29.54    1.23 
   0  -8   1   31.40    1.25 
   0  -8  -1   32.23    1.14 
   0  -8   1   30.31    1.14 
   0   8  -1   33.42    1.51 
   0  -8   1   36.18    1.35 
   0  -8   1   29.66    1.54 
   0  -8  -1   29.83    1.18 
   0  -8  -1   30.26    1.24 
   0  -8   1   31.21    1.21 
   0   8  -1   28.31    1.21 
   0   8   1   31.60    1.50 
   0   8   1   28.99    1.22 
   0  -8  -1   31.84    1.55 
   0  -8  -1   27.39    1.15 
   1  -8   1    6.17    0.38 
   1  -8   1    7.23    0.49 
  -1  -8  -1    6.53    0.42 
   1  -8   1    5.73    0.46 
  -1  -8  -1    7.21    0.46 
   1  -8   1    6.29    0.45 
  -1  -8  -1    6.73    0.42 
  -1  -8  -1    6.64    0.42 
  -1  -8  -1    6.37    0.39 
   1   8  -1    5.75    0.56 
  -1   8   1    5.99    0.39 
   1   8  -1    6.19    0.63 
   1  -8  -1    7.77    0.43 
   1   8   1    7.90    0.46 
  -1   8  -1    7.54    0.45 
   1   8   1    7.58    0.71 
   1  -8  -1    7.68    0.49 
  -1  -8   1    8.54    0.45 
  -1  -8   1    8.28    0.47 
  -1  -8   1    8.23    0.48 
   1  -8  -1    7.21    0.51 
  -1  -8   1    8.68    0.53 
   2  -8   1   12.76    0.64 
  -2  -8  -1   13.40    0.58 
  -2  -8  -1   11.78    0.61 
  -2  -8  -1   12.10    0.58 
  -2  -8  -1   13.05    0.56 
  -2  -8  -1   12.66    0.59 
  -2  -8   1   11.94    0.57 
  -2  -8   1   12.61    0.64 
  -2   8  -1   14.51    0.71 
  -2  -8   1   12.69    0.60 
   2  -8  -1   12.62    0.65 
  -2  -8   1   13.02    0.59 
   3  -8   1   19.56    1.13 
  -3   8   1   19.01    0.82 
  -3   8   1   22.01    0.80 
  -3   8   1   21.37    1.13 
  -3   8   1   21.76    1.09 
  -3   8   1   23.29    0.95 
  -3   8  -1   25.39    1.13 
  -3   8  -1   21.21    0.84 
  -3   8  -1   22.29    0.80 
   3  -8  -1   18.64    0.99 
  -3  -8   1   20.02    0.83 
  -4   8   1    7.96    0.42 
  -4   8   1    7.17    0.37 
  -4   8   1    8.01    0.40 
   4  -8   1    7.38    0.60 
   4  -8   1    6.95    0.57 
  -4   8  -1    9.48    0.45 
  -4   8  -1   10.77    0.51 
   4  -8  -1    9.51    0.64 
  -4   8  -1    9.61    0.47 
   4  -8  -1   10.41    0.66 
  -5   8   1   10.69    0.40 
   5  -8   1    9.95    0.59 
  -5   8   1    9.24    0.45 
  -5   8   1    9.71    0.52 
  -5   8   1   11.00    0.43 
  -5   8  -1   14.49    0.67 
   5  -8  -1   16.40    0.74 
  -5   8  -1   12.83    0.61 
   0  -9   1    5.70    0.35 
   0  -9   1    5.28    0.40 
   0  -9  -1    5.39    0.39 
   0  -9  -1    6.18    0.34 
   0   9   1    5.50    0.47 
   0  -9  -1    5.40    0.40 
  -1  -9  -1   15.48    0.69 
  -1  -9  -1   14.27    0.65 
  -1  -9  -1   17.51    0.66 
  -1  -9  -1   14.96    0.70 
   1   9  -1   13.55    0.87 
   1  -9   1   16.57    1.06 
   1  -9  -1   15.39    0.73 
  -1  -9   1   15.61    0.66 
  -1  -9   1   14.12    0.70 
   1  -9  -1   15.29    0.64 
   1   9   1   15.51    0.87 
  -1  -9   1   16.71    0.67 
   2   9  -1    3.66    0.41 
  -2   9   1    2.71    0.50 
  -2   9   1    4.57    0.34 
  -2  -9  -1    3.76    0.25 
   2  -9   1    4.08    0.58 
  -2  -9  -1    3.26    0.20 
   2  -9   1    3.61    0.33 
   2   9   1    2.33    0.40 
   2  -9  -1    2.91    0.28 
  -2  -9   1    2.28    0.18 
  -2  -9   1    2.33    0.22 
   2  -9  -1    2.78    0.43 
  -2   9  -1    2.43    0.26 
  -2   9  -1    2.50    0.41 
  -2  -9   1    2.19    0.24 
   3  -9   1    2.68    0.28 
   3   9  -1    2.18    0.35 
  -3  -9  -1    2.79    0.20 
  -3   9   1    2.46    0.24 
  -3   9  -1    2.07    0.24 
   3  -9  -1    1.95    0.26 
   3   9   1    1.62    0.33 
  -3  -9   1    1.55    0.17 
   0   0  -2  101.82    3.40 
   0   0   2  103.37    3.39 
   0   0   2  100.13    3.39 
   0   0   2  103.62    3.39 
   0   0   2   98.69    3.39 
   0   0  -2   97.82    3.39 
   0   0   2  100.84    3.39 
   0   0  -2  101.70    3.39 
   0   0  -2  100.88    3.39 
   0   0   2  107.07    3.40 
   0   0  -2  100.59    3.39 
  -2   0   2    1.39    0.09 
   2   0  -2    1.42    0.11 
  -2   0  -2    1.46    0.13 
  -2   0   2    1.46    0.09 
   2   0  -2    1.40    0.11 
   3   0  -2    3.42    0.20 
  -3   0  -2    3.31    0.22 
  -3   0   2    3.59    0.15 
  -3   0   2    3.56    0.15 
   3   0  -2    3.27    0.20 
  -3   0   2    3.91    0.23 
   3   0  -2    3.37    0.17 
  -4   0  -2   18.05    0.76 
  -4   0   2   17.77    0.77 
  -4   0  -2   18.39    0.78 
   4   0  -2   17.78    0.66 
  -5   0  -2   13.25    0.64 
  -5   0   2   14.41    0.69 
  -5   0   2   13.86    0.54 
  -5   0  -2   13.12    0.66 
  -5   0  -2   14.10    0.70 
  -6   0   2   12.59    0.71 
  -6   0  -2   14.01    0.74 
  -7   0   2   12.39    0.67 
  -7   0  -2   11.27    0.66 
  -7   0  -2   11.50    0.69 
  -8   0   2    2.84    0.31 
   0  -1   2  301.47   10.42 
   0  -1   2  320.13   10.44 
   0   1   2  306.42   10.42 
   0  -1  -2  309.23   10.43 
   0  -1   2  300.19   10.42 
   0   1  -2  300.28   10.43 
   0  -1  -2  322.13   10.43 
   0  -1  -2  312.13   10.42 
   0  -1  -2  326.76   10.42 
   0  -1  -2  325.67   10.43 
   0  -1   2  310.60   10.40 
   0   1  -2  328.89   10.44 
   0   1  -2  300.59   10.42 
   0   1   2  332.65   10.44 
   0  -1  -2  306.58   10.40 
   0   1  -2  319.94   10.38 
   0   1  -2  318.64   10.43 
   0   1  -2  282.15   10.39 
   0   1  -2  339.90   10.45 
   0   1   2  309.44   10.42 
   0  -1   2  298.93   10.42 
   1   1  -2    9.41    0.36 
   1  -1   2    8.55    0.37 
   1   1  -2    8.02    0.36 
  -1  -1  -2    8.41    0.33 
   1  -1   2    8.69    0.38 
  -1  -1  -2    8.31    0.33 
   1   1  -2    8.74    0.35 
  -1  -1  -2    9.06    0.33 
  -1   1   2    7.84    0.37 
   1  -1   2    8.15    0.38 
   1   1  -2    8.06    0.36 
  -1   1   2    8.42    0.33 
  -1  -1  -2    8.11    0.32 
  -1   1   2    9.08    0.37 
  -1   1   2    8.69    0.36 
   1  -1   2    8.27    0.36 
  -1   1  -2   10.98    0.44 
  -1  -1   2   10.88    0.45 
   1  -1  -2   11.30    0.47 
   1  -1  -2   11.07    0.47 
  -1   1  -2   11.91    0.47 
   1  -1  -2   11.52    0.47 
  -1  -1   2   10.70    0.44 
  -1   1  -2   11.55    0.44 
   1   1   2   11.47    0.42 
  -1   1  -2   10.99    0.43 
  -1   1  -2   11.42    0.46 
  -1  -1   2   11.36    0.45 
   1  -1  -2   10.91    0.46 
  -1   1  -2   11.72    0.41 
   1   1   2   11.50    0.44 
  -1   1  -2   12.40    0.47 
  -1  -1   2   11.44    0.45 
  -1   1  -2   11.12    0.46 
   1   1   2   11.28    0.42 
   2  -1   2  460.18   15.32 
  -2  -1  -2  477.86   15.26 
  -2   1   2  448.34   15.32 
  -2   1   2  471.73   15.41 
  -2   1   2  445.08   15.22 
  -2   1   2  461.70   15.33 
   2  -1  -2  460.23   15.66 
  -2   1  -2  474.63   15.59 
  -2   1  -2  465.19   15.53 
   2  -1  -2  482.00   15.66 
   3  -1   2   43.22    1.52 
  -3  -1  -2   43.98    1.59 
  -3   1   2   45.35    1.59 
   3   1  -2   45.17    1.57 
   3  -1   2   39.62    1.58 
   3   1  -2   46.53    1.51 
  -3   1   2   46.54    1.51 
  -3   1   2   45.98    1.51 
  -3   1  -2   53.11    1.91 
  -3   1  -2   55.17    1.83 
   3  -1  -2   56.79    1.85 
  -3   1  -2   54.08    1.79 
  -3  -1   2   52.54    1.87 
   3  -1  -2   51.87    1.94 
  -3   1  -2   53.40    1.85 
  -4  -1  -2  110.97    3.79 
  -4  -1  -2  109.03    3.66 
   4  -1   2  108.21    3.65 
  -4   1   2  106.47    3.77 
  -4  -1  -2  108.39    3.74 
   4  -1  -2  114.34    3.84 
  -4   1  -2  113.97    3.93 
  -4   1  -2  113.14    3.95 
  -4  -1   2  112.69    3.94 
  -5  -1  -2   45.71    1.76 
  -5  -1  -2   44.90    1.59 
  -5   1   2   45.80    1.76 
  -5  -1   2   37.67    1.50 
  -5   1  -2   37.92    1.49 
  -5  -1   2   36.61    1.33 
  -5   1  -2   39.30    1.52 
   5  -1  -2   37.40    1.36 
  -6  -1  -2   40.83    1.69 
  -6   1   2   41.98    1.68 
  -6  -1   2   43.36    1.52 
  -6   1  -2   42.02    1.73 
  -7   1   2    2.15    0.38 
  -7   1   2    1.94    0.27 
  -7   1   2    1.96    0.31 
  -7   1  -2    1.06    0.18 
  -7   1  -2    0.64    0.36 
  -7   1  -2    0.66    0.27 
  -7  -1   2    0.91    0.25 
  -8   1   2   26.51    1.09 
  -8   1  -2   28.17    1.07 
   0   2  -2    1.21    0.15 
   0   2   2    1.23    0.14 
   0   2   2    1.07    0.13 
   0   2  -2    1.34    0.14 
   0  -2   2    1.22    0.14 
   0   2  -2    1.12    0.15 
   0   2   2    1.35    0.14 
   0  -2  -2    1.11    0.14 
   0  -2   2    1.30    0.15 
   0  -2  -2    1.35    0.15 
   0   2  -2    1.40    0.13 
   0   2   2    1.08    0.13 
   0   2  -2    1.18    0.12 
   0  -2   2    1.10    0.14 
   0  -2  -2    1.04    0.14 
   0  -2   2    1.39    0.16 
   0  -2   2    1.05    0.15 
   0  -2  -2    1.18    0.14 
   0   2  -2    1.56    0.16 
   0  -2   2    1.27    0.15 
   1   2  -2   93.27    3.22 
  -1   2   2   94.32    3.22 
  -1  -2  -2   90.87    3.18 
  -1  -2  -2   92.61    3.11 
   1  -2   2   91.85    3.25 
  -1   2   2   97.67    3.22 
  -1  -2  -2   93.75    3.18 
  -1  -2  -2   91.04    3.12 
  -1  -2  -2   96.88    3.19 
   1   2  -2   88.71    3.16 
   1  -2   2   96.80    3.25 
   1   2  -2   91.81    3.20 
  -1   2   2   90.13    3.15 
  -1  -2  -2   97.23    3.12 
  -1  -2  -2   96.70    3.14 
  -1  -2   2   99.82    3.41 
  -1  -2   2  102.22    3.39 
  -1  -2   2  101.55    3.38 
   1   2   2   99.56    3.36 
  -1   2  -2   98.61    3.40 
  -1   2  -2   95.92    3.31 
  -1   2  -2   98.64    3.41 
  -1  -2   2   86.72    3.36 
   1  -2  -2   97.26    3.41 
  -1   2  -2   97.15    3.32 
  -1  -2   2  100.47    3.38 
   1  -2  -2   99.24    3.40 
  -1   2  -2  101.24    3.39 
   1  -2  -2  102.18    3.42 
   1   2   2   96.53    3.37 
  -1   2  -2  100.18    3.35 
   1   2   2  101.63    3.37 
  -2   2   2  100.22    3.46 
  -2   2   2  104.17    3.46 
  -2  -2  -2   98.33    3.32 
   2  -2   2   98.69    3.49 
  -2  -2  -2  101.34    3.39 
  -2  -2  -2  101.30    3.36 
   2   2  -2  101.88    3.45 
   2   2  -2   97.39    3.42 
   2   2  -2   99.27    3.36 
  -2   2   2   98.66    3.36 
  -2  -2  -2   99.79    3.36 
  -2   2   2  102.53    3.37 
   2  -2   2   99.63    3.37 
  -2  -2   2  114.39    3.73 
  -2   2  -2  104.95    3.67 
  -2   2  -2  111.15    3.77 
  -2  -2   2  113.46    3.69 
  -2  -2   2  112.88    3.69 
  -2   2  -2  106.47    3.72 
   2  -2  -2  110.72    3.71 
   2   2   2  110.56    3.71 
  -2   2  -2  108.93    3.68 
  -2   2  -2  111.49    3.78 
   2   2   2  104.56    3.71 
  -3   2   2   44.74    1.77 
  -3  -2  -2   43.28    1.55 
  -3   2   2   45.08    1.56 
   3  -2   2   43.15    1.58 
   3  -2   2   51.96    2.04 
   3   2  -2   44.24    1.55 
   3  -2  -2   45.36    1.59 
  -3   2  -2   45.79    1.59 
  -3   2  -2   42.56    1.54 
  -3   2  -2   46.41    1.63 
  -4  -2  -2   70.66    2.33 
   4  -2   2   65.24    2.34 
  -4   2   2   67.51    2.28 
  -4   2   2   68.31    2.45 
  -4   2  -2   75.28    2.77 
   4  -2  -2   79.96    2.69 
  -4   2  -2   77.18    2.75 
  -5  -2  -2   18.37    0.70 
   5  -2   2   17.85    0.72 
  -5   2   2   18.62    0.86 
  -5  -2   2   20.47    0.78 
  -5   2  -2   21.23    0.97 
   5  -2  -2   21.11    0.85 
  -6  -2  -2   17.02    0.72 
  -6   2   2   18.00    0.73 
  -6  -2  -2   18.08    0.69 
  -6   2   2   17.47    0.88 
  -6  -2   2   12.11    0.51 
  -6   2  -2   11.92    0.69 
  -6   2  -2   11.89    0.55 
  -7   2   2    7.66    0.47 
  -7   2   2    6.48    0.45 
  -7   2   2    8.20    0.53 
  -7   2  -2    8.99    0.56 
  -7   2  -2    8.85    0.43 
  -8   2   2    6.88    0.43 
  -8   2  -2    5.40    0.30 
   0   3  -2    5.69    0.31 
   0  -3  -2    6.13    0.27 
   0  -3   2    5.80    0.37 
   0  -3  -2    6.14    0.36 
   0   3   2    6.20    0.36 
   0  -3  -2    6.17    0.37 
   0   3   2    6.12    0.29 
   0  -3   2    6.87    0.39 
  -1  -3  -2   47.97    1.73 
  -1  -3  -2   50.26    1.62 
  -1  -3  -2   47.98    1.66 
   1   3  -2   43.92    1.64 
  -1   3   2   48.03    1.65 
  -1   3   2   45.76    1.76 
  -1  -3  -2   48.73    1.73 
  -1   3   2   46.07    1.66 
  -1  -3  -2   48.12    1.61 
   1  -3   2   45.98    1.65 
  -1   3   2   46.49    1.76 
   1   3  -2   48.47    1.69 
   1   3   2   57.13    2.07 
  -1  -3   2   52.78    1.98 
  -1   3  -2   55.06    1.89 
   1   3   2   52.40    1.88 
  -1  -3   2   53.36    1.99 
  -1   3  -2   56.73    1.95 
  -1   3  -2   54.21    1.90 
  -1   3  -2   55.73    2.02 
  -2   3   2  237.56    8.06 
   2   3  -2  222.48    7.90 
  -2   3   2  232.49    8.06 
  -2  -3  -2  244.76    7.86 
  -2  -3  -2  239.83    7.88 
  -2   3   2  244.77    7.92 
  -2  -3  -2  231.23    7.95 
   2  -3   2  243.29    7.93 
  -2   3   2  244.54    7.91 
   2   3  -2  235.11    7.95 
  -2  -3  -2  236.99    7.93 
   2   3  -2  235.53    8.03 
  -2   3  -2  238.26    8.25 
   2   3   2  229.12    8.12 
  -2  -3   2  250.34    8.21 
   2   3   2  233.86    8.23 
  -2   3  -2  246.23    8.16 
   2  -3  -2  246.54    8.16 
  -2   3  -2  254.17    8.28 
  -2   3  -2  238.68    8.13 
  -2  -3   2  246.86    8.16 
  -2   3  -2  257.28    8.13 
   3   3  -2   39.73    1.37 
  -3   3   2   37.98    1.37 
  -3   3   2   36.94    1.34 
   3  -3   2   40.86    1.41 
  -3  -3  -2   39.00    1.35 
   3   3   2   43.39    1.51 
  -3   3  -2   41.99    1.59 
  -3   3  -2   44.47    1.47 
   3  -3  -2   44.12    1.58 
  -3   3  -2   43.60    1.52 
   4  -3   2  117.25    3.85 
  -4  -3  -2  113.43    3.77 
  -4  -3  -2  114.01    3.72 
  -4   3   2  112.73    3.78 
  -4   3   2  108.68    3.93 
  -4  -3  -2  111.10    3.78 
   4   3  -2  107.05    3.78 
  -4   3  -2  100.87    3.52 
  -4   3  -2  105.85    3.67 
   4  -3  -2  105.63    3.63 
  -4   3  -2  105.89    3.71 
  -4  -3   2  104.58    3.49 
  -4  -3   2  105.95    3.54 
   5  -3   2  632.99   20.93 
  -5  -3  -2  634.71   20.86 
  -5   3   2  631.62   21.08 
  -5  -3  -2  622.86   20.90 
  -5   3  -2  660.52   21.83 
   5  -3  -2  662.55   21.70 
  -5  -3   2  635.94   21.60 
  -6   3   2   18.74    0.85 
  -6  -3  -2   20.19    0.79 
  -6   3   2   18.83    0.75 
  -6   3   2   18.64    0.90 
  -6   3   2   19.77    0.95 
  -6   3   2   18.23    0.77 
  -6  -3  -2   19.21    0.74 
  -6   3  -2   21.13    0.95 
  -6   3  -2   20.96    1.02 
  -6   3  -2   21.41    0.82 
  -6  -3   2   21.69    0.82 
  -6   3  -2   22.05    0.87 
  -7   3   2    4.93    0.39 
  -7   3   2    4.77    0.30 
  -7   3   2    4.79    0.25 
  -7   3   2    5.21    0.41 
  -7   3  -2    4.52    0.29 
  -7  -3   2    4.51    0.26 
  -8   3   2   16.10    0.68 
  -8   3  -2   19.84    0.75 
   0  -4  -2    9.49    0.55 
   0   4  -2    9.23    0.42 
   0   4  -2    9.61    0.46 
   0   4   2    8.24    0.41 
   0  -4  -2    8.24    0.39 
   1   4  -2  142.61    5.03 
  -1  -4  -2  155.44    5.48 
   1   4  -2  148.88    5.05 
  -1   4   2  149.24    5.13 
  -1  -4  -2  150.13    5.07 
  -1   4   2  144.65    5.04 
   1   4  -2  147.79    5.09 
  -1  -4  -2  150.39    5.01 
  -1  -4  -2  155.68    5.00 
  -1   4  -2  166.80    5.72 
  -1   4  -2  171.80    5.71 
  -1   4  -2  174.16    5.78 
  -1  -4   2  170.00    5.87 
   1   4   2  164.78    5.71 
  -2  -4  -2  111.22    3.79 
  -2   4   2  112.69    3.85 
  -2  -4  -2  113.84    3.88 
  -2   4   2  112.63    3.86 
   2  -4   2  117.34    3.88 
  -2   4   2  115.64    3.87 
   2   4  -2  108.43    3.84 
   2   4  -2  113.70    3.86 
   2  -4  -2  101.58    3.57 
   2   4   2  106.44    3.53 
  -2   4  -2  101.83    3.53 
  -2   4  -2  102.96    3.52 
  -3   4   2   31.57    1.19 
  -3  -4  -2   31.99    1.12 
   3   4  -2   31.83    1.19 
  -3   4   2   32.18    1.17 
   3  -4   2   32.83    1.23 
  -3  -4   2   39.83    1.38 
   3  -4  -2   38.06    1.48 
   3   4   2   39.24    1.42 
  -3   4  -2   40.29    1.42 
  -3   4  -2   40.60    1.39 
  -3  -4   2   37.61    1.36 
  -4  -4  -2   46.45    1.53 
   4  -4   2   45.47    1.67 
  -4   4   2   41.07    1.78 
  -4  -4  -2   43.86    1.57 
  -4   4   2   45.97    1.60 
   4   4  -2   44.90    1.61 
  -4   4   2   46.19    1.78 
  -4   4  -2   45.92    1.56 
  -4  -4   2   42.09    1.51 
  -4   4  -2   42.91    1.74 
   4   4   2   44.72    1.57 
   4  -4  -2   44.48    1.68 
  -4   4  -2   44.74    1.75 
  -4  -4   2   43.40    1.54 
  -5  -4  -2   64.52    2.28 
  -5   4   2   62.57    2.42 
  -5   4   2   66.42    2.47 
  -5  -4  -2   66.02    2.24 
   5  -4   2   63.10    2.34 
  -5  -4   2   61.77    2.12 
  -5   4  -2   64.56    2.36 
   5  -4  -2   56.20    2.23 
  -6   4   2    1.20    0.17 
  -6   4   2    1.14    0.21 
  -6   4   2    0.90    0.18 
  -6  -4  -2    1.28    0.15 
  -6  -4  -2    1.26    0.19 
  -6   4   2    0.84    0.25 
  -6  -4   2    1.56    0.19 
  -6   4  -2    1.57    0.30 
  -6   4  -2    1.25    0.23 
  -6   4  -2    1.65    0.18 
  -6   4  -2    1.53    0.19 
  -7   4   2   20.91    0.79 
  -7   4   2   21.16    0.89 
  -7   4   2   22.55    0.84 
  -7   4  -2   18.46    0.71 
  -7   4  -2   20.45    0.76 
   0   5   2    2.31    0.18 
   0   5  -2    1.86    0.18 
   0   5   2    2.12    0.20 
   0   5  -2    2.06    0.23 
   0  -5  -2    2.08    0.19 
  -1   5   2    4.04    0.25 
  -1  -5  -2    3.53    0.21 
  -1  -5  -2    3.62    0.23 
   1   5  -2    4.41    0.28 
  -1  -5  -2    3.61    0.28 
   1   5  -2    3.28    0.24 
  -1   5  -2    4.41    0.26 
   1   5   2    4.33    0.29 
   1   5   2    4.37    0.27 
  -2   5   2  148.08    5.12 
   2   5  -2  148.49    5.11 
  -2  -5  -2  152.96    5.14 
  -2   5   2  140.74    5.10 
  -2  -5  -2  150.10    5.06 
  -2  -5  -2  145.50    5.02 
  -2  -5  -2  149.34    5.02 
  -2   5   2  148.06    5.09 
  -2   5   2  167.14    5.44 
   2   5  -2  147.37    5.08 
  -2  -5   2  127.95    4.73 
  -2   5  -2  149.08    4.88 
  -2   5  -2  144.36    4.89 
  -2   5  -2  141.89    5.06 
  -2   5  -2  149.63    4.89 
  -2  -5   2  141.15    4.85 
  -2  -5   2  139.07    4.82 
  -2  -5   2  145.79    4.80 
  -2  -5   2  143.41    4.81 
   2   5   2  150.81    4.90 
   3   5  -2   38.48    1.43 
  -3   5   2   37.06    1.62 
  -3  -5  -2   36.10    1.34 
  -3   5   2   37.71    1.41 
  -3   5   2   38.95    1.43 
   3  -5   2   40.29    1.48 
  -3   5   2   37.39    1.38 
  -3   5  -2   40.19    1.79 
  -3  -5   2   45.75    1.57 
   3   5   2   45.17    1.64 
  -3  -5   2   42.35    1.58 
  -3   5  -2   42.18    1.58 
  -3   5  -2   48.81    1.64 
   3  -5  -2   46.63    1.73 
  -3  -5   2   45.59    1.56 
   4  -5   2   31.67    1.30 
  -4   5   2   32.87    1.46 
  -4  -5  -2   31.54    1.22 
  -4   5   2   32.92    1.39 
   4   5  -2   32.04    1.25 
  -4  -5  -2   34.30    1.15 
  -4  -5   2   31.34    1.13 
  -4  -5   2   31.97    1.16 
   4  -5  -2   31.79    1.31 
  -4   5  -2   33.33    1.38 
  -4   5  -2   31.36    1.39 
   4   5   2   31.03    1.20 
  -5   5   2   55.56    1.99 
  -5   5   2   53.16    2.03 
  -5   5   2   56.11    1.99 
  -5   5   2   54.65    2.17 
  -5  -5  -2   56.41    1.99 
  -5   5   2   56.48    2.00 
  -5   5   2   56.88    2.19 
  -5   5   2   56.59    2.08 
  -5   5   2   55.94    1.99 
  -5   5  -2   54.85    1.90 
  -5   5  -2   51.22    1.99 
  -5   5  -2   53.45    2.09 
  -5   5  -2   52.55    2.10 
  -5   5  -2   50.86    1.89 
  -5  -5   2   55.82    1.88 
  -5  -5   2   51.54    1.81 
  -5   5  -2   56.32    1.92 
  -6   5   2   23.51    0.93 
  -6   5   2   24.10    1.00 
  -6   5   2   25.08    1.02 
  -6   5   2   24.55    0.94 
  -6   5  -2   24.29    0.91 
  -6   5  -2   21.68    0.96 
  -6   5  -2   23.20    0.90 
  -6  -5   2   23.67    0.88 
  -7   5   2    6.80    0.31 
  -7   5   2    6.31    0.32 
  -7   5  -2    5.13    0.26 
  -7   5  -2    5.37    0.28 
   0  -6   2    0.39    0.13 
   0   6  -2    0.72    0.16 
   0  -6  -2    0.82    0.20 
   0   6   2    0.42    0.16 
   0  -6  -2    0.36    0.14 
   0  -6  -2    0.81    0.17 
   0  -6   2    0.41    0.14 
  -1  -6  -2    6.90    0.34 
  -1   6   2    6.73    0.40 
   1   6  -2    7.02    0.42 
  -1  -6  -2    7.27    0.45 
   1   6  -2    6.68    0.38 
  -1  -6  -2    6.34    0.38 
  -1  -6  -2    6.95    0.37 
  -1   6  -2    6.47    0.36 
   1  -6  -2    6.41    0.43 
  -1  -6   2    5.75    0.36 
   1   6   2    6.24    0.39 
  -1  -6   2    6.32    0.30 
  -1  -6   2    6.18    0.34 
  -1  -6   2    5.80    0.34 
   1   6   2    6.22    0.37 
   2   6  -2   22.34    0.93 
  -2   6   2   22.12    0.90 
  -2  -6  -2   22.35    0.85 
  -2   6   2   21.46    1.11 
   2   6  -2   21.82    0.90 
  -2  -6  -2   21.77    0.96 
  -2  -6  -2   20.37    0.87 
  -2  -6  -2   21.74    0.83 
  -2  -6   2   23.32    0.89 
  -2   6  -2   22.13    0.90 
  -2   6  -2   21.80    1.10 
  -2  -6   2   22.14    0.85 
   2   6   2   21.58    0.93 
  -2  -6   2   20.29    0.83 
  -2  -6   2   22.26    0.83 
  -3  -6  -2    4.02    0.28 
  -3  -6  -2    4.91    0.28 
  -3   6   2    4.80    0.32 
  -3   6   2    4.29    0.48 
  -3   6   2    4.52    0.31 
  -3  -6   2    6.95    0.32 
  -3  -6   2    5.69    0.35 
  -3  -6   2    6.55    0.33 
   3   6   2    6.54    0.40 
  -3   6  -2    6.68    0.54 
  -3   6  -2    6.33    0.36 
  -4  -6  -2   87.47    3.00 
  -4   6   2   86.32    3.11 
  -4   6   2   84.44    3.02 
  -4   6   2   89.58    3.31 
  -4   6   2   85.87    3.20 
  -4   6   2   87.30    3.00 
  -4   6   2   84.40    3.11 
  -4  -6  -2   87.79    2.94 
  -4   6  -2   78.22    2.93 
  -4   6  -2   80.30    2.80 
  -4   6  -2   76.48    2.97 
  -4  -6   2   78.92    2.68 
  -4   6  -2   76.26    2.83 
  -4  -6   2   78.36    2.70 
  -4   6  -2   78.42    2.83 
  -4   6  -2   80.41    2.75 
  -5   6   2    6.63    0.43 
  -5   6   2    6.78    0.52 
  -5   6   2    6.99    0.36 
  -5   6   2    7.07    0.37 
  -5   6   2    5.75    0.36 
  -5   6   2    6.70    0.41 
  -5   6   2    6.98    0.37 
  -5   6  -2    5.63    0.35 
  -5  -6   2    4.94    0.28 
  -5   6  -2    5.45    0.31 
  -5   6  -2    5.51    0.35 
  -5   6  -2    5.35    0.37 
  -5   6  -2    5.14    0.31 
  -5   6  -2    5.21    0.30 
  -5  -6   2    4.53    0.24 
  -5   6  -2    5.54    0.47 
  -6   6   2   30.18    1.20 
  -6   6   2   31.98    1.14 
  -6   6   2   31.13    1.14 
  -6   6   2   31.66    1.15 
  -6   6  -2   30.32    1.10 
  -6   6  -2   29.97    1.14 
  -6   6  -2   29.03    1.06 
  -6   6  -2   27.23    1.09 
   0   7  -2  126.71    4.34 
   0  -7   2  128.84    4.37 
   0   7   2  125.87    4.37 
   0  -7  -2  129.94    4.39 
   0  -7  -2  124.50    4.30 
   0  -7  -2  118.56    4.43 
  -1  -7  -2   56.77    1.90 
   1   7  -2   55.59    2.05 
  -1  -7  -2   53.29    2.05 
  -1   7   2   57.74    2.07 
  -1   7  -2   58.19    2.08 
   1   7   2   58.75    2.11 
  -1  -7   2   58.76    2.09 
  -1  -7   2   57.48    1.98 
   1  -7  -2   52.16    2.24 
  -1  -7   2   61.22    1.97 
   1   7   2   49.31    2.36 
  -2  -7  -2   42.37    1.63 
   2  -7   2   39.55    1.78 
   2   7  -2   37.80    1.49 
  -2  -7  -2   37.64    1.46 
  -2  -7  -2   40.52    1.45 
  -2  -7  -2   39.28    1.48 
  -2   7   2   38.74    1.50 
  -2   7   2   40.44    1.62 
  -2   7   2   36.74    1.45 
  -2  -7  -2   39.45    1.51 
  -2  -7   2   41.30    1.58 
   2  -7  -2   44.92    1.72 
  -2  -7   2   48.16    1.79 
  -2   7  -2   42.99    1.75 
  -2  -7   2   41.39    1.50 
  -2  -7   2   43.37    1.58 
  -2  -7   2   41.95    1.53 
  -2   7  -2   42.05    1.83 
  -2  -7   2   38.42    1.60 
  -2   7  -2   39.82    1.55 
  -2   7  -2   43.84    1.79 
   2  -7  -2   39.56    1.81 
   3  -7   2   45.66    2.08 
  -3   7   2   46.51    1.76 
  -3   7   2   47.38    2.00 
  -3  -7  -2   45.03    1.61 
  -3   7   2   44.80    1.66 
  -3   7   2   44.73    1.80 
  -3  -7  -2   44.49    1.64 
  -3   7   2   49.74    2.22 
  -3   7   2   47.95    1.69 
  -3   7  -2   48.03    1.70 
   3  -7  -2   46.36    2.11 
  -3   7  -2   48.09    1.75 
  -3  -7   2   49.40    1.70 
  -3  -7   2   48.74    1.70 
  -3   7  -2   48.39    2.01 
  -3   7  -2   45.63    1.80 
  -3   7  -2   49.29    1.86 
  -3   7  -2   47.05    2.14 
  -3  -7   2   47.79    1.69 
  -3  -7   2   48.86    1.73 
  -4   7   2    6.94    0.45 
  -4   7   2    7.60    0.39 
  -4   7   2    6.66    0.43 
  -4  -7  -2    6.98    0.31 
   4  -7   2    6.42    0.69 
  -4   7   2    6.51    0.35 
  -4   7   2    6.17    0.54 
  -4   7  -2    5.62    0.36 
  -4  -7   2    5.02    0.27 
   4  -7  -2    5.49    0.62 
  -4   7  -2    5.22    0.37 
  -4  -7   2    5.23    0.28 
  -4   7  -2    5.35    0.37 
  -4   7  -2    5.23    0.32 
  -4   7  -2    5.69    0.55 
  -5   7   2   41.86    1.49 
  -5   7   2   44.40    1.49 
  -5   7   2   37.93    1.51 
  -5   7   2   40.26    1.46 
  -5   7   2   43.70    1.56 
   5  -7   2   39.65    1.89 
  -5   7  -2   45.42    1.59 
  -5   7  -2   42.52    1.67 
  -5   7  -2   43.94    1.67 
  -5   7  -2   46.95    1.63 
   5  -7  -2   43.16    1.97 
  -5   7  -2   47.27    1.61 
  -6   7   2    0.15    0.11 
   6  -7   2    0.46    0.25 
  -6   7   2    0.30    0.12 
  -6   7   2    0.49    0.11 
   6  -7  -2    0.54    0.25 
  -6   7  -2    0.56    0.12 
   0   8   2   32.16    1.53 
   0  -8   2   31.41    1.27 
   0  -8   2   31.14    1.16 
   0   8  -2   30.64    1.24 
   0  -8  -2   30.78    1.17 
   0  -8   2   30.95    1.23 
   0  -8   2   31.76    1.25 
   0  -8  -2   31.37    1.53 
   0   8   2   31.24    1.24 
   0  -8   2   33.59    1.21 
   0  -8  -2   29.08    1.25 
   0  -8  -2   28.37    1.19 
   0  -8  -2   30.98    1.31 
   0  -8   2   35.21    1.35 
   0  -8  -2   29.35    1.14 
   0  -8  -2   31.46    1.25 
   0   8  -2   31.70    1.46 
  -1  -8  -2   92.02    3.21 
  -1  -8  -2   87.54    3.24 
   1  -8   2   83.44    3.29 
   1   8  -2   90.41    3.57 
   1  -8   2   96.00    3.31 
  -1  -8  -2   87.48    3.16 
  -1  -8  -2   93.55    3.20 
  -1  -8  -2   96.55    3.23 
   1  -8   2   91.13    3.15 
   1  -8  -2   90.32    3.28 
  -1  -8   2   85.72    3.24 
  -1  -8   2   89.51    3.16 
   1  -8  -2   89.38    3.16 
   1   8   2   92.76    3.59 
  -1  -8   2   92.00    3.22 
  -1  -8   2   91.92    3.19 
   1  -8  -2   94.39    3.23 
  -2  -8  -2   36.20    1.33 
  -2   8   2   38.00    1.47 
  -2  -8  -2   37.78    1.34 
   2  -8   2   36.31    1.45 
  -2  -8  -2   35.73    1.35 
  -2  -8  -2   35.29    1.36 
  -2  -8  -2   34.20    1.38 
  -2  -8   2   35.79    1.38 
   2  -8  -2   36.56    1.39 
  -2  -8   2   33.15    1.31 
  -2  -8   2   37.20    1.35 
  -2  -8   2   36.29    1.33 
  -2   8  -2   33.39    1.41 
  -3   8   2   20.57    1.06 
   3  -8   2   21.03    1.03 
  -3   8   2   19.16    0.80 
  -3   8   2   20.18    1.04 
  -3   8   2   21.78    0.92 
  -3   8   2   18.87    0.77 
  -3   8  -2   22.63    0.84 
   3  -8  -2   23.55    1.07 
  -3   8  -2   23.27    1.17 
  -3  -8   2   20.16    0.88 
  -3   8  -2   24.45    0.98 
  -4   8   2   28.27    1.17 
  -4   8   2   32.11    1.19 
  -4   8   2   30.41    1.21 
   4  -8   2   34.96    1.45 
   4  -8   2   28.34    1.58 
  -4   8   2   31.52    1.14 
  -4   8  -2   36.61    1.27 
  -4   8  -2   32.66    1.23 
   4  -8  -2   30.55    1.41 
  -4   8  -2   33.50    1.34 
   5  -8   2    0.67    0.20 
  -5   8   2    0.91    0.11 
  -5   8   2    0.89    0.13 
   5  -8   2    0.86    0.25 
  -5   8   2    0.90    0.17 
  -5   8   2    0.68    0.16 
   5  -8  -2    0.43    0.18 
   0  -9   2   13.74    0.67 
   0   9   2   11.28    0.69 
   0  -9  -2   11.38    0.61 
   0  -9  -2   11.95    0.54 
   0  -9   2   13.05    0.56 
   0  -9  -2   12.51    0.60 
  -1  -9  -2   10.46    0.48 
  -1  -9  -2   10.42    0.49 
   1  -9   2    8.40    0.85 
   1  -9   2   10.68    0.59 
  -1  -9  -2   10.57    0.52 
   1   9  -2   11.70    0.72 
  -1  -9  -2   10.27    0.52 
   1  -9  -2    9.90    0.54 
   1  -9  -2   10.54    0.52 
  -1  -9   2   10.27    0.48 
  -1  -9   2   10.15    0.48 
   1  -9  -2    9.42    0.46 
   1  -9  -2   10.26    0.75 
  -1  -9   2   10.41    0.53 
   1   9   2    8.17    0.64 
  -2  -9  -2   25.94    0.91 
   2  -9   2   27.81    1.08 
  -2  -9  -2   25.42    0.96 
  -2   9   2   23.79    1.03 
   2   9  -2   26.94    1.22 
  -2   9   2   22.51    1.33 
   2   9   2   25.01    1.22 
   2  -9  -2   24.48    1.14 
  -2   9  -2   26.29    1.06 
  -2  -9   2   26.20    0.98 
   2  -9  -2   28.75    1.41 
   2  -9  -2   24.17    1.04 
  -2  -9   2   25.95    1.00 
  -2  -9   2   26.41    0.94 
  -2   9  -2   23.45    1.31 
   3  -9   2    1.65    0.26 
  -3  -9  -2    1.98    0.17 
  -3   9   2    2.47    0.24 
   3   9  -2    1.81    0.29 
  -3  -9   2    2.52    0.20 
  -3   9  -2    3.17    0.28 
   3  -9  -2    2.85    0.28 
   3   9   2    2.81    0.37 
   0   0  -3    0.14    0.06 
   0   0  -3    0.18    0.06 
   0   0   3    0.04    0.04 
   0   0   3    0.04    0.05 
   0   0  -3    0.12    0.06 
   0   0   3   -0.01    0.05 
   0   0   3    0.06    0.06 
   0   0  -3    0.10    0.06 
   0   0   3    0.11    0.06 
   0   0  -3    0.05    0.03 
   0   0  -3    0.04    0.05 
   0   0  -3    0.16    0.06 
   1   0   3  165.68    5.91 
  -1   0  -3  173.54    5.91 
  -1   0  -3  182.39    5.92 
   1   0   3  179.47    5.91 
  -1   0   3  179.69    5.92 
   1   0  -3  172.91    5.93 
  -1   0   3  179.22    5.91 
   1   0   3  175.09    5.91 
  -1   0  -3  179.96    5.90 
  -1   0  -3  184.31    5.93 
   1   0  -3  176.51    5.92 
  -1   0   3  178.71    5.92 
  -1   0  -3  180.80    5.92 
  -1   0   3  176.37    5.93 
   1   0  -3  178.59    5.93 
  -1   0  -3  174.76    5.86 
   1   0  -3  173.57    5.93 
  -1   0   3  181.38    5.93 
   1   0   3  171.07    5.91 
  -1   0   3  182.02    5.87 
  -2   0   3   16.55    0.56 
  -2   0  -3   16.43    0.62 
   2   0   3   15.36    0.57 
  -2   0  -3   15.94    0.56 
  -2   0  -3   15.07    0.56 
  -2   0   3   15.52    0.60 
  -2   0   3   16.33    0.60 
   2   0  -3   15.44    0.63 
   2   0   3   16.78    0.58 
  -2   0   3   15.50    0.62 
   2   0  -3   16.29    0.63 
  -3   0   3  375.95   12.25 
   3   0  -3  357.18   12.29 
   3   0  -3  379.40   12.21 
  -3   0  -3  375.56   12.28 
  -3   0   3  363.95   12.17 
   3   0   3  360.63   12.19 
  -4   0   3   46.80    1.75 
  -4   0  -3   48.62    1.65 
  -4   0  -3   46.22    1.76 
  -4   0  -3   47.83    1.74 
   4   0  -3   48.07    1.65 
   5   0  -3    6.14    0.39 
  -5   0   3    5.98    0.40 
  -5   0  -3    5.79    0.41 
  -5   0  -3    5.87    0.37 
  -5   0   3    5.76    0.27 
  -5   0  -3    5.50    0.38 
  -6   0  -3   58.83    2.29 
  -6   0   3   60.44    2.29 
  -7   0   3   61.98    2.28 
  -7   0   3   58.58    2.20 
  -7   0  -3   57.45    2.07 
  -7   0  -3   59.29    2.10 
  -8   0   3    2.81    0.30 
   0  -1   3   22.90    0.86 
   0   1   3   22.04    0.82 
   0   1  -3   20.99    0.82 
   0   1  -3   21.37    0.84 
   0  -1  -3   21.70    0.81 
   0  -1   3   23.22    0.82 
   0  -1  -3   21.78    0.82 
   0   1  -3   22.26    0.82 
   0   1  -3   22.45    0.78 
   0  -1  -3   22.22    0.82 
   0  -1   3   22.68    0.76 
   0  -1  -3   21.74    0.81 
   0   1   3   22.26    0.81 
   0  -1  -3   23.18    0.81 
   0  -1  -3   21.13    0.82 
   0   1   3   22.35    0.82 
   0  -1   3   20.49    0.81 
   0  -1  -3   21.42    0.76 
   0  -1   3   20.14    0.82 
   0  -1   3   22.40    0.83 
   0   1  -3   20.67    0.76 
   0   1  -3   21.65    0.83 
   0   1  -3   21.65    0.82 
   1  -1   3   61.14    2.07 
   1  -1   3   56.42    2.07 
   1   1  -3   59.83    2.07 
   1   1  -3   56.54    2.06 
  -1   1   3   61.13    2.06 
  -1  -1  -3   59.79    2.02 
  -1   1   3   61.69    2.08 
  -1   1   3   58.41    2.01 
  -1  -1  -3   58.79    2.03 
  -1  -1  -3   60.53    1.97 
   1   1  -3   60.40    2.07 
   1  -1   3   58.39    2.06 
  -1  -1  -3   56.80    2.03 
  -1  -1  -3   60.15    1.97 
  -1   1   3   60.22    2.07 
  -1  -1  -3   60.46    2.02 
   1   1  -3   60.40    2.06 
  -1   1   3   57.79    2.07 
   1  -1   3   57.08    2.08 
  -1  -1  -3   62.40    2.02 
  -1  -1   3   63.44    2.08 
  -1   1  -3   62.74    2.09 
  -1  -1   3   56.36    2.07 
  -1   1  -3   60.78    2.02 
   1  -1  -3   64.52    2.10 
  -1   1  -3   57.36    2.09 
   1   1   3   60.71    2.06 
   1   1   3   58.21    2.07 
   1  -1  -3   54.93    2.09 
  -1  -1   3   62.54    2.09 
  -1   1  -3   58.21    2.09 
   1  -1  -3   63.45    2.11 
   1   1   3   57.91    2.05 
  -1  -1   3   61.28    2.09 
   1  -1  -3   58.93    2.09 
  -1   1  -3   57.69    2.08 
  -1   1  -3   61.45    2.05 
  -1   1  -3   62.25    2.05 
  -2   1   3  219.69    7.19 
  -2   1   3  217.44    7.26 
   2  -1   3  217.52    7.27 
  -2  -1  -3  217.02    7.24 
  -2   1   3  213.13    7.27 
  -2   1   3  219.37    7.18 
   2   1  -3  222.48    7.27 
   2   1  -3  209.43    7.25 
   2  -1   3  216.23    7.26 
  -2  -1   3  202.02    6.98 
  -2   1  -3  215.78    6.99 
  -2   1  -3  215.05    6.93 
  -2   1  -3  204.34    6.98 
  -2   1  -3  212.15    7.00 
  -2  -1   3  206.04    6.99 
  -2  -1   3  207.95    7.00 
  -2   1  -3  213.52    7.00 
  -2   1  -3  206.11    7.01 
   2  -1  -3  201.12    7.04 
   2   1   3  220.34    6.96 
   3   1  -3  143.38    4.97 
  -3  -1  -3  151.63    4.98 
  -3   1   3  152.99    5.01 
  -3   1   3  156.37    5.07 
   3  -1   3  139.13    4.97 
  -3   1   3  148.32    4.96 
  -3  -1  -3  153.27    5.06 
   3  -1  -3  121.28    4.32 
  -3   1  -3  126.67    4.19 
  -3   1  -3  130.84    4.27 
  -3   1  -3  122.64    4.14 
   3  -1  -3  127.31    4.21 
  -3  -1   3  122.91    4.20 
   4  -1   3   32.29    1.14 
  -4  -1  -3   32.65    1.24 
   4   1  -3   33.29    1.15 
  -4   1   3   32.76    1.26 
  -4  -1  -3   31.94    1.15 
  -4  -1  -3   32.01    1.27 
  -4   1  -3   30.74    1.22 
  -4  -1   3   30.77    1.21 
   4  -1  -3   31.03    1.12 
  -4   1  -3   31.25    1.21 
  -5  -1  -3  103.18    3.54 
  -5  -1  -3  107.82    3.74 
  -5   1   3  103.64    3.72 
  -5  -1   3  105.38    3.65 
  -5   1  -3  108.46    3.90 
  -5   1  -3  111.43    3.84 
  -5  -1   3  110.74    3.71 
   5  -1  -3  106.95    3.75 
  -5  -1   3  119.04    3.90 
  -5   1  -3  107.67    3.87 
  -6   1   3   58.42    2.24 
  -6  -1   3   57.46    2.12 
  -6   1  -3   58.05    2.33 
  -6   1  -3   69.11    2.25 
  -7   1   3    7.80    0.47 
  -7   1   3    7.76    0.52 
  -7   1   3    7.45    0.45 
  -7   1  -3    6.57    0.36 
  -7   1  -3    6.49    0.47 
  -7  -1   3    5.81    0.44 
  -7  -1   3    6.87    0.45 
  -8   1   3   39.90    1.53 
  -8   1  -3   48.59    1.67 
  -8  -1   3   45.95    1.99 
   0   2   3  205.32    6.71 
   0  -2  -3  205.10    6.72 
   0  -2   3  202.43    6.74 
   0   2  -3  189.57    6.72 
   0   2  -3  193.82    6.73 
   0   2   3  199.87    6.72 
   0  -2  -3  188.26    6.70 
   0  -2   3  212.82    6.74 
   0   2  -3  190.90    6.74 
   0  -2   3  208.75    6.74 
   0   2  -3  199.53    6.67 
   0   2   3  192.82    6.64 
   0   2  -3  201.22    6.64 
   0  -2  -3  202.05    6.72 
   0  -2   3  205.58    6.74 
   0   2   3  195.04    6.72 
   1   2  -3  719.24   23.92 
  -1  -2  -3  744.35   23.89 
   1  -2   3  724.50   24.04 
  -1   2   3  734.34   24.02 
  -1   2   3  688.66   23.88 
  -1   2  -3  763.85   23.63 
   1  -2  -3  690.65   23.77 
  -1   2  -3  744.35   23.65 
  -1  -2   3  684.84   23.76 
  -1   2  -3  720.85   23.64 
  -1   2  -3  724.50   23.69 
  -1   2  -3  675.17   23.76 
   2  -2   3  271.62    8.97 
  -2   2   3  276.35    8.97 
  -2  -2  -3  269.55    8.99 
  -2  -2  -3  272.35    8.98 
   2  -2   3  261.23    9.09 
  -2   2   3  268.08    8.96 
   2   2  -3  253.00    9.04 
   2   2  -3  272.35    8.96 
  -2   2   3  274.61    9.07 
  -2   2   3  271.47    9.07 
  -2  -2  -3  270.44    8.92 
  -2  -2  -3  273.14    8.99 
  -2  -2  -3  277.56    8.99 
  -2   2  -3  277.03    8.88 
  -2  -2   3  251.28    8.83 
  -2   2  -3  265.75    8.88 
  -2  -2   3  252.42    8.74 
  -2  -2   3  279.29    8.82 
   2  -2  -3  276.77    8.80 
   2   2   3  262.63    8.76 
  -2   2  -3  263.04    8.76 
  -2   2  -3  255.32    8.77 
   2   2   3  247.80    8.81 
  -2   2  -3  265.86    8.81 
   2   2   3  275.97    8.83 
   3   2  -3   39.72    1.40 
  -3  -2  -3   40.30    1.40 
   3  -2   3   39.87    1.42 
  -3   2   3   40.71    1.40 
  -3   2   3   40.94    1.36 
  -3   2  -3   33.93    1.23 
   3  -2  -3   31.84    1.19 
  -3   2  -3   32.34    1.13 
   4  -2   3    9.01    0.41 
  -4  -2  -3    9.87    0.40 
  -4   2   3    9.28    0.50 
   4   2  -3    9.29    0.39 
  -4   2   3    9.26    0.37 
  -4   2  -3    7.60    0.45 
  -4   2  -3    7.69    0.43 
  -4  -2   3    7.37    0.33 
  -4  -2   3    7.78    0.30 
   4  -2  -3    8.14    0.39 
  -5   2   3    0.58    0.19 
  -5  -2  -3    0.56    0.11 
   5  -2   3    0.50    0.12 
   5  -2  -3    0.96    0.16 
  -5   2  -3    0.70    0.21 
  -5  -2   3    0.65    0.12 
  -6   2   3    4.52    0.32 
  -6  -2  -3    5.18    0.44 
  -6  -2  -3    5.75    0.29 
  -6   2   3    5.17    0.44 
  -6  -2   3    6.28    0.32 
  -6   2  -3    5.86    0.47 
  -6   2  -3    5.91    0.35 
  -7   2   3   17.94    0.89 
  -7   2   3   19.58    0.86 
  -7  -2   3   17.26    0.69 
  -7   2  -3   17.74    0.73 
  -8   2   3    1.39    0.21 
  -8   2   3    2.25    0.26 
  -8   2  -3    3.44    0.23 
   0  -3  -3  114.34    3.85 
   0   3  -3  110.50    3.84 
   0  -3  -3  111.33    3.96 
   0   3   3  113.38    3.84 
   0  -3  -3  121.44    3.97 
   0  -3   3  114.73    3.99 
   0  -3  -3  114.37    3.82 
   0   3   3  106.37    3.93 
   0   3  -3  117.77    3.88 
  -1  -3  -3  309.88   10.11 
   1   3  -3  306.74   10.19 
   1  -3   3  304.62   10.15 
  -1  -3  -3  310.25   10.24 
  -1  -3  -3  311.04   10.17 
  -1  -3  -3  314.45   10.24 
  -1   3   3  298.67   10.15 
  -1   3   3  294.46   10.26 
   1   3  -3  298.76   10.14 
  -1  -3  -3  308.72   10.12 
  -1   3   3  301.30   10.17 
  -1   3  -3  309.08   10.14 
  -1   3  -3  310.06   10.22 
  -1   3  -3  290.30   10.07 
  -1  -3   3  298.72   10.20 
   1  -3  -3  314.98   10.10 
  -1  -3   3  306.05   10.20 
  -1   3  -3  306.14   10.09 
   1   3   3  291.27   10.08 
   2  -3   3  116.64    4.04 
  -2   3   3  118.93    4.04 
  -2  -3  -3  121.80    4.00 
   2   3  -3  117.41    4.08 
  -2  -3  -3  121.06    3.98 
  -2  -3  -3  118.64    4.05 
  -2  -3  -3  120.67    4.09 
  -2   3   3  114.86    4.03 
   2   3  -3  124.93    4.04 
  -2   3   3  120.05    4.18 
  -2   3  -3  115.20    3.92 
  -2   3  -3  108.33    3.99 
  -2   3  -3  122.18    4.07 
  -2   3  -3  122.79    4.10 
   2   3   3  113.13    3.91 
   2  -3  -3  112.31    3.96 
  -2   3  -3  120.44    3.92 
  -2  -3   3  118.97    4.02 
  -2  -3   3  112.88    3.88 
  -3   3   3    5.15    0.26 
   3   3  -3    4.86    0.25 
   3  -3   3    4.87    0.27 
  -3  -3  -3    4.83    0.24 
  -3   3   3    4.80    0.24 
  -3   3   3    4.39    0.25 
   3   3   3    8.03    0.34 
   3  -3  -3    7.78    0.40 
  -3   3  -3    8.01    0.35 
  -3   3  -3    7.76    0.40 
   4   3  -3   29.03    1.05 
  -4  -3  -3   28.59    0.97 
  -4  -3  -3   28.40    1.04 
  -4  -3  -3   29.09    1.02 
  -4   3   3   28.75    1.20 
  -4   3   3   26.93    1.17 
  -4   3   3   29.91    1.04 
   4  -3   3   27.71    1.08 
  -4  -3   3   24.74    0.90 
  -4   3  -3   25.27    1.03 
  -4  -3   3   23.60    0.86 
  -4   3  -3   24.56    1.06 
   4  -3  -3   25.62    1.00 
  -4   3  -3   24.94    0.89 
  -5   3   3   93.72    3.49 
  -5  -3  -3   96.55    3.32 
  -5  -3  -3   99.60    3.28 
  -5  -3   3   88.55    2.95 
   5  -3  -3   87.60    3.05 
  -5  -3   3   82.36    2.87 
  -5   3  -3   86.63    3.16 
  -6  -3  -3    6.94    0.37 
  -6   3   3    6.91    0.44 
  -6   3   3    7.09    0.36 
  -6   3   3    6.23    0.49 
  -6  -3  -3    7.49    0.35 
  -6   3   3    7.49    0.51 
  -6   3  -3    8.23    0.40 
  -6   3  -3    8.78    0.51 
  -6   3  -3    8.77    0.44 
  -6   3  -3    8.59    0.59 
  -6  -3   3    8.87    0.40 
  -7   3   3   34.02    1.34 
  -7   3   3   33.94    1.26 
  -7   3   3   34.06    1.39 
  -7   3   3   35.07    1.21 
  -7  -3   3   40.77    1.42 
  -7   3  -3   38.50    1.44 
  -8   3   3   36.46    1.39 
  -8   3  -3   48.73    1.70 
   0  -4  -3   12.64    0.55 
   0   4   3   12.27    0.53 
   0   4  -3   12.15    0.53 
   0   4  -3   12.81    0.58 
   0  -4  -3   12.56    0.51 
   0  -4  -3   11.60    0.64 
  -1  -4  -3   58.44    1.99 
   1   4  -3   57.16    2.02 
  -1  -4  -3   58.93    2.07 
  -1   4   3   56.98    2.03 
  -1  -4  -3   59.61    2.00 
   1   4  -3   60.22    2.05 
   1   4  -3   55.35    2.08 
  -1   4  -3   58.20    2.02 
  -1   4  -3   57.07    2.08 
  -1  -4   3   57.01    2.17 
  -1   4  -3   56.26    2.00 
   1   4   3   56.44    2.01 
  -2  -4  -3  210.67    6.89 
   2  -4   3  195.78    6.87 
   2   4  -3  200.01    6.84 
  -2  -4  -3  212.38    6.79 
  -2   4   3  201.59    6.87 
  -2   4   3  195.75    6.85 
  -2   4   3  207.84    6.85 
   2   4  -3  207.91    6.85 
  -2   4  -3  201.59    6.84 
  -2   4  -3  205.71    6.83 
   2  -4  -3  202.62    6.88 
   2   4   3  204.33    6.84 
   3   4  -3   39.42    1.48 
  -3  -4  -3   40.96    1.42 
  -3   4   3   40.60    1.49 
   3  -4   3   40.94    1.52 
   3   4  -3   42.19    1.49 
  -3   4   3   42.05    1.47 
  -3   4   3   41.50    1.49 
  -3  -4   3   36.00    1.26 
  -3   4  -3   34.14    1.26 
   3   4   3   37.77    1.31 
  -3   4  -3   38.70    1.32 
  -3  -4   3   34.63    1.25 
   3  -4  -3   33.81    1.37 
  -3  -4   3   35.82    1.23 
   4  -4   3   22.30    0.92 
  -4   4   3   22.26    1.06 
  -4   4   3   23.53    0.87 
  -4   4   3   21.22    1.00 
  -4  -4  -3   22.76    0.79 
   4   4  -3   22.36    0.87 
  -4   4  -3   26.54    1.19 
  -4  -4   3   28.09    1.00 
  -4   4  -3   29.05    1.02 
   4  -4  -3   26.08    1.11 
  -4  -4   3   27.60    0.97 
   4   4   3   27.50    1.01 
  -4   4  -3   26.37    1.17 
  -5   4   3   18.18    0.76 
   5  -4   3   18.64    0.82 
  -5  -4  -3   18.26    0.77 
  -5   4   3   18.22    0.92 
  -5   4   3   20.27    0.93 
   5  -4  -3   20.87    0.92 
  -5   4  -3   20.74    0.84 
  -5  -4   3   20.49    0.80 
  -5  -4   3   21.47    0.74 
  -5   4  -3   20.74    1.00 
  -6   4   3   94.43    3.15 
  -6   4   3   89.94    3.39 
  -6  -4  -3   89.89    3.16 
  -6   4   3   89.85    3.23 
  -6   4   3   91.87    3.15 
  -6   4  -3   72.38    2.82 
  -6   4  -3   77.15    2.63 
  -6  -4   3   75.96    2.61 
  -6   4  -3   77.48    2.65 
  -7   4   3    5.66    0.27 
  -7   4   3    4.66    0.35 
  -7   4   3    5.45    0.30 
  -7   4  -3    6.68    0.32 
  -7   4  -3    7.37    0.36 
   0   5   3   82.59    2.96 
   0   5  -3   83.12    2.94 
   0   5   3   87.06    2.99 
   0   5  -3   83.65    3.04 
   0  -5  -3   86.43    2.95 
   0  -5  -3   88.35    3.01 
  -1  -5  -3   32.44    1.26 
  -1   5   3   32.54    1.21 
   1   5  -3   31.82    1.23 
  -1  -5  -3   32.53    1.18 
   1   5  -3   31.08    1.19 
  -1   5  -3   35.26    1.30 
   1   5   3   36.82    1.35 
   1   5   3   35.46    1.31 
  -1   5  -3   34.32    1.42 
   1  -5  -3   35.74    1.37 
  -2   5   3   50.79    1.82 
  -2   5   3   49.88    1.80 
  -2  -5  -3   50.69    1.85 
  -2   5   3   46.58    1.82 
  -2   5   3   48.60    2.00 
  -2  -5  -3   49.14    1.77 
   2   5  -3   47.83    1.78 
   2   5  -3   51.81    1.82 
  -2  -5  -3   49.66    1.74 
  -2  -5  -3   51.30    1.73 
  -2  -5   3   45.47    1.51 
   2   5   3   43.16    1.65 
  -2   5  -3   43.45    1.64 
  -2   5  -3   44.83    1.65 
  -2   5  -3   47.59    1.65 
  -2  -5   3   44.83    1.58 
  -2  -5   3   43.59    1.57 
  -2   5  -3   46.17    1.83 
  -3   5   3   60.57    2.11 
  -3   5   3   57.44    2.10 
  -3  -5  -3   54.44    2.21 
   3  -5   3   59.06    2.15 
   3   5  -3   55.35    2.09 
  -3   5   3   59.15    2.34 
   3   5  -3   61.42    2.12 
  -3  -5  -3   60.19    2.03 
  -3   5   3   59.90    2.07 
  -3  -5   3   63.68    2.15 
   3   5   3   65.38    2.22 
  -3   5  -3   60.73    2.39 
  -3   5  -3   58.30    2.15 
  -3  -5   3   61.92    2.14 
  -3   5  -3   62.22    2.21 
  -3  -5   3   62.23    2.16 
   4   5  -3    6.13    0.37 
  -4   5   3    5.80    0.46 
  -4  -5  -3    5.86    0.33 
  -4  -5  -3    6.40    0.28 
  -4   5   3    5.84    0.53 
   4  -5   3    5.99    0.40 
  -4   5   3    6.18    0.24 
  -4   5  -3    5.40    0.45 
   4   5   3    4.92    0.31 
  -4  -5   3    5.00    0.28 
  -4  -5   3    5.08    0.25 
  -4   5  -3    5.04    0.42 
   4  -5  -3    4.82    0.39 
  -5   5   3  119.27    4.02 
  -5   5   3  118.70    4.03 
  -5   5   3  117.83    4.02 
  -5   5   3  113.30    4.10 
  -5   5   3  112.57    4.03 
  -5  -5  -3  119.06    4.02 
  -5   5   3  120.58    4.24 
  -5   5   3  117.87    4.21 
  -5   5   3  117.59    4.09 
  -5   5  -3  133.56    4.55 
  -5   5  -3  134.42    4.52 
  -5   5  -3  134.66    4.53 
  -5   5  -3  133.57    4.72 
  -5   5  -3  129.42    4.63 
  -5  -5   3  134.63    4.44 
  -5  -5   3  132.84    4.51 
  -5   5  -3  133.64    4.74 
  -6   5   3   11.46    0.57 
  -6   5   3   10.79    0.50 
  -6   5   3   10.71    0.56 
  -6   5   3   11.24    0.50 
  -6   5  -3   10.27    0.55 
  -6  -5   3   11.30    0.49 
  -6   5  -3   11.59    0.51 
  -6   5  -3   12.30    0.52 
  -7   5   3    6.73    0.33 
  -7   5   3    6.91    0.32 
  -7   5  -3    9.48    0.38 
  -7   5  -3    8.20    0.39 
   0  -6  -3   77.84    2.78 
   0  -6   3   76.17    2.69 
   0  -6  -3   72.95    2.71 
   0   6   3   78.75    2.71 
   0  -6  -3   72.32    2.68 
   0   6  -3   79.38    2.69 
  -1  -6  -3  132.16    4.54 
  -1  -6  -3  135.63    4.49 
  -1   6   3  133.50    4.59 
  -1  -6  -3  133.51    4.58 
   1   6  -3  132.68    4.61 
   1   6  -3  132.47    4.57 
  -1  -6  -3  133.32    4.66 
  -1  -6   3  127.17    4.41 
  -1  -6   3  126.84    4.34 
  -1  -6   3  133.46    4.36 
  -1  -6   3  128.12    4.41 
   1   6   3  132.45    4.48 
  -1   6  -3  129.28    4.41 
   1   6   3  129.39    4.45 
   1  -6  -3  124.44    4.50 
   2   6  -3   28.02    1.13 
  -2  -6  -3   28.50    1.08 
  -2  -6  -3   29.93    1.20 
  -2   6   3   28.58    1.14 
  -2  -6  -3   28.72    1.11 
  -2   6   3   28.41    1.38 
   2   6  -3   29.95    1.17 
  -2  -6  -3   27.92    1.06 
  -2  -6   3   25.95    0.98 
  -2  -6   3   24.60    0.93 
   2   6   3   24.34    1.02 
  -2  -6   3   23.46    0.94 
  -2  -6   3   24.95    0.92 
  -2   6  -3   25.07    1.20 
  -3   6   3    1.32    0.21 
  -3   6   3    1.26    0.19 
  -3   6   3    1.51    0.34 
   3   6  -3    1.20    0.19 
   3   6  -3    1.39    0.21 
  -3  -6  -3    1.87    0.18 
  -3  -6   3    0.55    0.13 
  -3   6  -3    0.43    0.13 
   3   6   3    0.49    0.16 
  -3   6  -3    0.84    0.39 
  -3  -6   3    0.68    0.14 
  -3  -6   3    0.72    0.16 
  -4   6   3   36.27    1.44 
  -4  -6  -3   36.28    1.33 
  -4  -6  -3   37.24    1.27 
  -4   6   3   35.09    1.43 
  -4   6   3   37.42    1.62 
  -4   6   3   35.45    1.33 
  -4   6   3   37.04    1.35 
  -4   6   3   33.01    1.50 
  -4   6  -3   34.98    1.36 
  -4  -6   3   36.91    1.29 
  -4   6  -3   36.82    1.34 
  -4  -6   3   36.06    1.27 
  -4   6  -3   36.31    1.52 
  -4   6  -3   34.44    1.40 
  -4   6  -3   33.76    1.41 
  -4   6  -3   35.81    1.53 
  -5   6   3    4.75    0.31 
  -5   6   3    5.20    0.32 
  -5   6   3    5.27    0.32 
  -5  -6  -3    4.77    0.30 
  -5   6   3    4.98    0.36 
  -5   6   3    4.87    0.36 
  -5   6   3    5.22    0.30 
  -5   6   3    4.71    0.46 
  -5   6  -3    6.73    0.41 
  -5  -6   3    5.72    0.32 
  -5   6  -3    5.46    0.32 
  -5   6  -3    5.20    0.31 
  -5   6  -3    5.89    0.46 
  -5   6  -3    6.11    0.39 
  -5   6  -3    5.91    0.37 
  -5  -6   3    5.58    0.25 
  -6   6   3   14.41    0.58 
  -6   6   3   14.25    0.63 
  -6   6   3   13.59    0.57 
  -6   6   3   13.36    0.57 
  -6   6  -3   13.59    0.62 
  -6   6  -3   12.73    0.56 
  -6   6  -3   13.34    0.54 
   0  -7  -3    5.70    0.41 
   0  -7  -3    6.43    0.38 
   0  -7  -3    5.34    0.45 
   0  -7   3    6.18    0.40 
   0   7  -3    6.38    0.38 
   0   7   3    6.51    0.41 
  -1  -7  -3   20.15    0.87 
   1   7  -3   19.13    0.84 
  -1   7   3   19.82    0.86 
  -1  -7  -3   19.42    0.70 
  -1  -7   3   23.09    0.95 
   1   7   3   22.56    0.96 
  -1   7  -3   21.76    0.93 
  -1  -7   3   22.65    0.86 
  -1  -7   3   23.10    0.85 
   2   7  -3   10.77    0.55 
  -2  -7  -3   11.00    0.54 
  -2  -7  -3   10.33    0.51 
  -2   7   3   11.39    0.56 
  -2   7   3   10.44    0.50 
  -2  -7  -3   11.82    0.54 
  -2  -7  -3   10.22    0.58 
  -2   7   3   10.65    0.63 
   2  -7   3   11.37    0.80 
  -2  -7  -3    9.31    0.48 
  -2   7  -3   12.45    0.56 
  -2  -7   3   12.73    0.59 
  -2  -7   3   11.45    0.57 
  -2  -7   3   12.68    0.52 
  -2   7  -3   12.37    0.80 
  -2  -7   3   12.17    0.65 
   2  -7  -3   11.65    0.60 
  -2  -7   3   12.00    0.57 
  -2  -7   3   12.38    0.60 
   2  -7  -3   12.33    0.77 
  -2   7  -3   12.17    0.68 
  -3   7   3   11.01    0.57 
  -3  -7  -3   10.87    0.47 
   3  -7   3   12.15    0.88 
  -3   7   3    9.29    0.85 
  -3   7   3    9.98    0.61 
  -3   7   3   11.02    0.77 
  -3   7   3   10.56    0.53 
  -3   7   3   10.66    0.50 
  -3  -7  -3   10.24    0.43 
  -3   7   3   10.77    0.51 
  -3   7  -3   11.30    0.75 
  -3  -7   3   12.58    0.53 
  -3  -7   3   12.20    0.53 
  -3  -7   3   12.07    0.52 
  -3   7  -3   12.13    0.52 
  -3   7  -3   12.03    0.65 
  -3   7  -3   12.54    0.62 
  -3   7  -3   12.15    0.91 
  -3   7  -3   12.01    0.56 
   3  -7  -3   13.16    0.89 
  -3  -7   3   12.35    0.56 
   4  -7   3   10.18    0.79 
  -4   7   3   10.38    0.57 
  -4   7   3    9.98    0.69 
  -4  -7  -3   10.06    0.42 
  -4   7   3   10.90    0.57 
  -4   7   3    9.85    0.46 
  -4   7   3   10.01    0.48 
   4  -7  -3   10.28    0.81 
  -4   7  -3   12.04    0.73 
  -4   7  -3   10.75    0.56 
  -4  -7   3   10.90    0.46 
  -4   7  -3   11.53    0.52 
  -4   7  -3   11.49    0.54 
  -4   7  -3   10.51    0.56 
  -4  -7   3   11.22    0.48 
  -5   7   3    6.90    0.35 
  -5   7   3    6.98    0.41 
   5  -7   3    8.55    0.68 
  -5   7   3    6.36    0.35 
  -5   7   3    7.79    0.44 
  -5   7   3    6.93    0.36 
   5  -7  -3    4.83    0.57 
  -5   7  -3    6.88    0.32 
  -5   7  -3    6.19    0.35 
  -6   7   3   14.75    0.55 
   6  -7   3   12.60    0.75 
  -6   7   3   16.09    0.62 
   6  -7  -3   14.22    0.74 
  -6   7  -3   12.02    0.52 
  -6   7  -3   14.45    0.58 
   0  -8   3  101.08    3.43 
   0  -8  -3   95.97    3.48 
   0  -8  -3   96.64    3.72 
   0  -8   3  100.02    3.46 
   0  -8   3  102.46    3.90 
   0  -8  -3   99.65    3.54 
   0  -8  -3  103.84    3.45 
   0  -8   3  100.75    3.48 
   0  -8  -3  107.05    3.35 
   0  -8   3   92.14    3.53 
   0  -8   3   94.48    3.37 
   0   8   3  102.03    3.78 
   0   8  -3   84.19    3.50 
   0  -8  -3  101.22    3.49 
  -1  -8  -3   10.73    0.60 
   1  -8   3   10.84    0.54 
  -1  -8  -3   10.43    0.56 
  -1  -8  -3   11.01    0.57 
  -1  -8  -3   10.96    0.56 
  -1   8   3   12.00    0.85 
   1  -8   3   10.61    0.65 
  -1  -8  -3   10.31    0.53 
   1   8  -3   10.50    0.77 
  -1  -8   3    9.15    0.57 
  -1  -8   3   10.01    0.50 
  -1  -8   3    9.69    0.44 
   1  -8  -3    9.96    0.49 
   1  -8  -3    9.62    0.54 
   1   8   3   10.57    0.82 
   1  -8  -3    9.69    0.59 
  -1  -8   3    9.78    0.53 
  -2  -8  -3   29.49    1.14 
  -2  -8  -3   29.27    1.11 
  -2  -8  -3   29.12    1.13 
  -2  -8  -3   29.43    1.10 
  -2  -8  -3   32.63    1.28 
  -2   8   3   28.99    1.23 
  -2  -8  -3   27.22    1.15 
   2  -8   3   30.23    1.25 
  -2  -8   3   28.72    1.19 
  -2  -8   3   28.96    1.06 
   2  -8  -3   28.89    1.17 
  -2  -8   3   30.06    1.13 
  -2  -8   3   28.93    1.12 
  -2  -8   3   28.14    1.12 
  -2   8  -3   30.17    1.22 
  -3   8   3   17.57    0.94 
  -3   8   3   17.11    0.77 
  -3   8   3   16.35    0.77 
  -3   8   3   18.94    1.06 
   3  -8   3   14.33    0.85 
  -3   8   3   17.82    0.67 
   3  -8   3   16.19    0.99 
  -3   8   3   16.65    0.69 
  -3  -8   3   19.88    0.84 
  -3   8  -3   15.65    0.92 
   3  -8  -3   16.92    0.82 
  -3  -8   3   15.91    0.69 
  -3  -8   3   16.09    0.63 
  -4   8   3   16.00    0.76 
  -4   8   3   16.92    0.71 
   4  -8   3   17.80    0.95 
  -4   8   3   16.40    0.68 
   4  -8   3   18.23    0.94 
  -4   8   3   17.12    0.73 
   4  -8  -3   18.52    0.89 
  -4   8  -3   17.59    0.73 
   5  -8   3    0.61    0.17 
   5  -8   3    0.73    0.26 
  -5   8   3    0.41    0.14 
  -5   8   3    0.58    0.11 
  -5   8   3    0.57    0.12 
  -5   8  -3    0.96    0.16 
   5  -8  -3    0.94    0.19 
   0  -9  -3    0.71    0.23 
   0  -9  -3    0.91    0.23 
   0   9   3    0.88    0.29 
   0  -9  -3    0.88    0.19 
   1  -9   3    0.07    0.21 
  -1  -9  -3    0.79    0.18 
  -1  -9  -3    0.18    0.15 
  -1  -9  -3    0.06    0.10 
  -1  -9  -3    0.17    0.14 
   1  -9  -3    0.25    0.11 
   1  -9  -3    0.24    0.16 
   1   9   3    0.37    0.28 
   1  -9  -3    0.24    0.16 
   2  -9   3    5.49    0.41 
   2   9  -3    6.52    0.51 
  -2  -9  -3    6.13    0.33 
   2  -9   3    6.69    0.73 
  -2   9   3    6.68    0.66 
   2  -9  -3    5.55    0.33 
  -2  -9   3    4.40    0.24 
   2  -9  -3    3.46    0.52 
   2  -9  -3    4.44    0.34 
  -2   9  -3    3.67    0.33 
   2   9   3    5.06    0.49 
  -2  -9   3    4.41    0.31 
  -2  -9   3    4.86    0.29 
   3  -9   3   29.46    1.11 
   3   9  -3   21.56    1.11 
  -3   9   3   25.27    1.01 
  -3  -9   3   24.05    0.90 
  -3   9  -3   25.67    0.97 
   3   9   3   22.89    1.17 
   3  -9  -3   24.80    0.99 
  -1   0  -4  819.55   27.10 
  -2   0  -4  212.93    7.11 
  -2   0   4  213.92    7.12 
  -2   0   4  214.57    7.20 
  -2   0  -4  209.69    7.15 
  -2   0  -4  220.15    7.17 
  -2   0  -4  218.03    7.19 
   2   0   4  215.00    7.17 
   2   0   4  215.13    7.18 
   2   0  -4  213.63    7.23 
  -2   0   4  215.61    7.12 
   2   0  -4  217.15    7.17 
   3   0  -4   22.39    0.82 
   3   0   4   23.33    0.85 
  -3   0   4   21.40    0.78 
   3   0  -4   20.59    0.91 
  -3   0  -4   23.55    0.89 
   3   0   4   22.24    0.78 
  -3   0  -4   22.58    0.82 
  -3   0   4   23.53    0.79 
   4   0  -4   14.19    0.55 
  -4   0   4   13.76    0.63 
  -4   0  -4   13.34    0.64 
  -4   0  -4   13.06    0.53 
  -4   0  -4   13.72    0.63 
   5   0  -4   18.23    0.74 
  -5   0  -4   18.80    0.87 
  -5   0  -4   19.10    0.85 
  -5   0  -4   19.24    0.84 
  -5   0   4   18.65    0.71 
  -5   0   4   19.33    0.86 
  -6   0   4   11.22    0.64 
  -6   0  -4   10.67    0.55 
  -6   0  -4   10.90    0.65 
  -7   0   4   18.32    0.85 
  -7   0   4   19.47    0.91 
  -7   0  -4   17.65    0.72 
  -7   0  -4   18.93    0.77 
  -8   0   4   11.52    0.58 
   0   1   4   37.05    1.37 
   0   1   4   38.04    1.36 
   0   1  -4   34.52    1.36 
   0   1  -4   37.83    1.37 
   0  -1  -4   38.67    1.29 
   0   1  -4   37.50    1.29 
   0  -1   4   39.07    1.29 
   0  -1  -4   38.23    1.36 
   0  -1  -4   37.54    1.35 
   0  -1   4   36.12    1.36 
   0   1  -4   36.68    1.36 
   0   1   4   37.36    1.37 
   0  -1   4   38.09    1.37 
   0  -1   4   38.59    1.37 
   0  -1  -4   37.09    1.36 
   0   1  -4   37.12    1.31 
   0  -1  -4   37.28    1.34 
   0  -1  -4   37.63    1.36 
   0   1   4   38.17    1.36 
   0  -1  -4   39.41    1.36 
  -1  -1  -4  337.35   10.97 
  -1  -1  -4  344.20   11.05 
  -1  -1  -4  347.01   11.07 
   1   1  -4  319.44   11.05 
   1  -1   4  347.90   11.09 
   1  -1   4  335.90   11.07 
  -1  -1  -4  345.14   11.01 
  -1  -1  -4  342.43   11.07 
  -1   1   4  325.82   11.07 
  -1   1   4  339.67   11.05 
  -1   1   4  329.90   10.98 
  -1   1   4  315.81   11.06 
  -1   1   4  322.24   11.07 
   1   1  -4  326.26   11.07 
   1   1  -4  305.85   11.06 
  -1  -1  -4  329.61   11.04 
   1  -1   4  340.69   11.08 
   1  -1   4  330.77   11.07 
   1   1  -4  319.28   11.07 
   1  -1  -4  338.89   11.52 
  -1   1  -4  372.36   11.58 
  -1  -1   4  361.74   11.56 
   1  -1  -4  327.85   11.45 
   1  -1  -4  351.51   11.53 
   1   1   4  306.45   11.56 
  -1  -1   4  326.12   11.51 
  -1   1  -4  332.68   11.52 
  -1   1  -4  347.34   11.46 
   1  -1  -4  368.23   11.55 
  -1   1  -4  339.73   11.51 
  -1  -1   4  336.15   11.52 
  -1  -1   4  341.40   11.44 
   1  -1  -4  351.81   11.53 
   1   1   4  331.81   11.53 
  -1   1  -4  350.69   11.45 
   1   1   4  357.10   11.53 
  -1   1  -4  369.70   11.47 
  -1   1  -4  361.57   11.56 
   2  -1   4   42.80    1.47 
   2  -1   4   42.83    1.55 
  -2  -1  -4   43.09    1.43 
  -2   1   4   43.65    1.47 
  -2  -1  -4   43.20    1.47 
  -2   1   4   44.41    1.47 
   2   1  -4   42.99    1.48 
  -2   1   4   40.83    1.55 
  -2  -1  -4   43.28    1.47 
  -2  -1  -4   43.45    1.52 
   2   1  -4   42.26    1.55 
  -2  -1   4   34.77    1.22 
  -2   1  -4   32.96    1.16 
  -2   1  -4   33.49    1.23 
  -2   1  -4   32.93    1.21 
  -2  -1   4   34.16    1.24 
  -2   1  -4   34.21    1.23 
  -2  -1   4   34.08    1.15 
   2   1   4   33.78    1.19 
   2   1   4   33.14    1.20 
   2  -1  -4   33.92    1.19 
   2  -1  -4   33.49    1.29 
   3   1  -4  188.00    6.27 
  -3  -1  -4  181.76    6.26 
   3  -1   4  193.41    6.26 
  -3   1   4  190.61    6.25 
  -3  -1  -4  190.95    6.35 
  -3   1   4  184.34    6.32 
  -3   1  -4  194.33    6.62 
  -3   1  -4  202.08    6.75 
   3  -1  -4  199.36    6.69 
  -3   1  -4  205.34    6.69 
  -4  -1  -4   34.99    1.35 
  -4   1   4   35.07    1.35 
   4  -1   4   34.96    1.24 
  -4  -1  -4   34.68    1.36 
  -4  -1  -4   35.28    1.25 
  -4   1   4   35.12    1.23 
   4   1  -4   36.54    1.25 
  -4  -1   4   30.68    1.21 
  -4   1  -4   30.60    1.23 
  -4   1  -4   31.19    1.21 
   4  -1  -4   31.93    1.15 
  -5   1   4   94.05    3.27 
  -5  -1  -4   86.83    3.23 
  -5  -1  -4   93.99    3.09 
  -5  -1  -4   89.19    3.27 
   5  -1  -4   81.92    2.87 
  -5   1  -4   83.16    3.01 
  -5   1  -4   85.04    2.97 
  -5  -1   4   83.57    3.00 
  -5   1  -4   88.33    3.36 
  -5  -1   4   80.39    2.77 
  -5  -1   4   78.75    2.81 
  -6  -1  -4   21.13    0.87 
  -6   1   4   21.87    1.01 
   6  -1  -4   23.50    0.98 
  -6   1  -4   21.48    0.91 
  -6   1  -4   24.45    1.09 
  -6  -1   4   23.20    0.87 
  -7   1   4   19.62    0.95 
  -7   1   4   20.22    0.90 
  -7   1   4   20.23    0.89 
  -7  -1   4   17.40    0.85 
  -7   1  -4   17.96    0.70 
  -7   1  -4   17.41    0.74 
  -7  -1   4   18.20    0.82 
  -8   1   4    8.17    0.47 
  -8   1  -4    7.97    0.37 
   0   2  -4    7.21    0.34 
   0  -2   4    6.70    0.40 
   0   2  -4    6.72    0.32 
   0  -2   4    7.38    0.40 
   0  -2  -4    7.91    0.39 
   0   2  -4    7.07    0.40 
   0   2  -4    7.64    0.41 
   0  -2  -4    7.43    0.31 
   0  -2  -4    7.74    0.38 
   0  -2  -4    7.19    0.30 
   0   2   4    7.77    0.42 
   0   2   4    7.10    0.38 
  -1   2   4   71.34    2.48 
   1   2  -4   65.50    2.47 
  -1   2   4   70.66    2.50 
  -1  -2  -4   70.55    2.35 
  -1  -2  -4   69.28    2.44 
  -1  -2  -4   69.40    2.44 
  -1   2   4   72.97    2.40 
  -1  -2  -4   69.62    2.43 
  -1  -2  -4   70.36    2.40 
  -1   2   4   71.18    2.38 
  -1  -2  -4   70.93    2.36 
   1   2   4   74.94    2.57 
  -1   2  -4   75.25    2.58 
  -1   2  -4   76.90    2.58 
  -1   2  -4   77.31    2.70 
  -1  -2   4   77.97    2.68 
   1   2   4   75.10    2.65 
  -1   2  -4   75.28    2.57 
  -1  -2   4   77.55    2.67 
  -1   2  -4   72.71    2.62 
  -1   2  -4   76.80    2.70 
  -1  -2   4   77.68    2.55 
  -2  -2  -4  404.33   13.61 
  -2   2   4  414.12   13.77 
  -2  -2  -4  401.57   13.69 
  -2  -2  -4  417.22   13.72 
  -2   2   4  407.65   13.76 
  -2   2   4  399.64   13.65 
  -2  -2  -4  427.86   13.69 
   2   2  -4  415.52   13.76 
  -2   2   4  410.76   13.65 
   2   2  -4  417.40   13.65 
   2  -2   4  419.77   13.66 
   2   2   4  393.16   13.87 
   2   2   4  406.26   13.79 
   2  -2  -4  425.07   13.83 
  -2   2  -4  421.59   13.85 
  -2  -2   4  409.07   13.77 
  -2   2  -4  424.28   13.80 
  -2   2  -4  426.40   13.93 
  -2  -2   4  405.26   13.87 
  -2   2  -4  462.67   13.95 
  -2   2  -4  417.65   13.80 
  -2  -2   4  396.14   13.88 
  -3   2   4  294.96    9.82 
  -3  -2  -4  287.17    9.89 
   3   2  -4  293.05    9.82 
   3  -2   4  303.14    9.84 
  -3  -2  -4  292.29    9.81 
  -3   2   4  303.85    9.78 
   3   2   4  302.91    9.87 
   3  -2  -4  296.55    9.94 
  -3   2  -4  297.72    9.88 
  -3   2  -4  309.17    9.97 
  -3  -2   4  284.24    9.86 
   4   2  -4   33.43    1.20 
  -4  -2  -4   32.91    1.20 
   4  -2   4   34.46    1.22 
  -4   2   4   32.96    1.32 
  -4   2   4   34.11    1.18 
  -4   2  -4   37.88    1.53 
  -4  -2   4   39.82    1.35 
  -4   2  -4   40.38    1.52 
  -4  -2   4   38.79    1.38 
   4  -2  -4   41.37    1.46 
  -5   2   4   67.08    2.54 
   5  -2   4   69.48    2.41 
  -5  -2  -4   69.10    2.37 
  -5  -2  -4   70.65    2.40 
  -5   2  -4   77.27    2.85 
  -5  -2   4   77.21    2.59 
  -5  -2   4   78.18    2.65 
  -5   2  -4   77.27    2.79 
   5  -2  -4   78.05    2.74 
  -6   2   4   85.44    3.17 
  -6   2  -4   80.37    2.93 
  -6  -2   4   86.59    2.89 
  -6   2  -4   86.49    3.14 
  -7   2   4   27.75    1.11 
  -7   2   4   26.41    1.16 
  -7   2   4   26.04    0.96 
  -7   2  -4   27.43    1.03 
  -7   2  -4   26.97    1.06 
  -7  -2   4   25.97    0.98 
  -7  -2   4   25.77    1.10 
  -8   2   4    9.74    0.53 
  -8   2   4   14.02    0.60 
  -8   2  -4   13.79    0.56 
   0   3  -4   12.62    0.55 
   0  -3   4   12.59    0.63 
   0  -3  -4   11.83    0.48 
   0   3   4   11.61    0.50 
   0  -3  -4   12.90    0.61 
   0   3   4   12.05    0.58 
   0  -3  -4   12.26    0.51 
   0  -3  -4   12.75    0.60 
   0   3  -4   11.70    0.49 
  -1  -3  -4   83.62    2.73 
  -1  -3  -4   78.21    2.77 
  -1   3   4   82.59    2.78 
   1   3  -4   80.18    2.81 
   1  -3   4   76.36    2.75 
  -1   3   4   82.18    2.76 
  -1  -3  -4   83.79    2.86 
  -1   3   4   82.41    2.89 
   1   3  -4   81.07    2.76 
  -1  -3  -4   77.45    2.71 
  -1  -3  -4   80.50    2.84 
  -1  -3   4   95.53    3.26 
  -1   3  -4   87.11    3.13 
  -1   3  -4   93.23    3.29 
   1   3   4   92.29    3.13 
  -1   3  -4   91.19    3.14 
  -1   3  -4   94.16    3.20 
   1  -3  -4   92.46    3.14 
  -1  -3   4   93.09    3.08 
  -1  -3   4   90.94    3.27 
  -2   3   4   14.55    0.59 
  -2   3   4   14.48    0.72 
   2   3  -4   14.72    0.65 
   2   3  -4   14.46    0.59 
  -2  -3  -4   15.20    0.56 
   2  -3   4   15.76    0.61 
  -2  -3  -4   15.04    0.61 
  -2  -3  -4   14.82    0.54 
  -2   3   4   15.89    0.61 
  -2  -3  -4   14.44    0.61 
  -2   3  -4   18.44    0.67 
  -2   3  -4   15.13    0.83 
   2   3   4   16.73    0.65 
  -2  -3   4   17.25    0.62 
   2  -3  -4   17.64    0.70 
  -2   3  -4   18.16    0.81 
  -2   3  -4   17.07    0.66 
  -3   3   4    1.48    0.15 
  -3  -3  -4    1.60    0.17 
  -3   3   4    1.48    0.14 
  -3  -3  -4    1.26    0.13 
   3  -3   4    1.97    0.16 
   3   3  -4    1.56    0.14 
  -3   3  -4    3.94    0.22 
  -3  -3   4    3.64    0.19 
  -3   3  -4    3.64    0.30 
   3  -3  -4    4.63    0.28 
   3   3   4    4.17    0.21 
  -3   3  -4    4.01    0.27 
  -4  -3  -4   79.10    2.66 
   4  -3   4   81.17    2.78 
   4   3  -4   80.22    2.75 
  -4   3   4   79.78    2.88 
  -4   3   4   81.45    2.73 
  -4   3   4   77.37    2.90 
  -4  -3  -4   78.87    2.73 
  -4   3  -4   81.54    2.89 
  -4   3  -4   79.10    2.89 
  -4   3  -4   79.36    2.86 
  -4  -3   4   80.54    2.75 
  -4  -3   4   81.53    2.72 
  -4   3  -4   81.41    2.74 
  -4   3  -4   82.03    2.93 
   4  -3  -4   80.91    2.86 
  -4   3  -4   81.37    2.78 
   5  -3   4   16.40    0.71 
  -5   3   4   16.57    0.79 
  -5   3   4   16.54    0.82 
  -5  -3  -4   16.29    0.68 
   5  -3  -4   22.47    0.96 
  -5  -3   4   22.38    0.79 
  -5   3  -4   22.29    1.05 
  -5  -3   4   23.40    0.85 
  -6   3   4   27.95    1.17 
  -6   3   4   28.47    1.08 
  -6   3   4   29.44    1.06 
  -6  -3  -4   28.06    1.08 
  -6   3   4   27.84    1.21 
  -6  -3   4   28.52    1.05 
  -6   3  -4   29.52    1.10 
  -6   3  -4   27.99    1.26 
  -6   3  -4   27.43    1.04 
  -7   3   4   18.23    0.86 
  -7   3   4   17.78    0.68 
  -7   3   4   18.14    0.72 
  -7   3   4   18.59    0.80 
  -7   3  -4   18.73    0.76 
  -8   3   4    0.63    0.18 
  -8   3  -4    0.59    0.13 
   0   4  -4  100.59    3.39 
   0   4  -4   89.55    3.42 
   0   4  -4  102.40    3.48 
   0  -4  -4  102.78    3.44 
   0  -4  -4  102.35    3.40 
   0   4   4   99.41    3.41 
   0   4   4  101.47    3.43 
   1   4  -4   89.48    3.13 
  -1  -4  -4   92.91    3.18 
   1   4  -4   89.52    3.20 
  -1  -4  -4   90.76    3.10 
  -1  -4  -4   93.59    3.09 
  -1   4   4   90.17    3.14 
   1   4  -4   93.95    3.15 
  -1   4  -4   93.86    3.22 
   1   4   4   94.56    3.23 
   1  -4  -4   96.76    3.25 
  -1   4  -4   98.59    3.31 
  -1   4  -4   91.92    3.24 
  -1   4  -4   95.11    3.20 
   1   4   4   87.00    3.24 
  -2   4   4   29.20    1.11 
   2   4  -4   28.78    1.08 
  -2   4   4   29.56    1.09 
   2   4  -4   29.27    1.16 
  -2  -4  -4   29.60    1.03 
   2   4  -4   29.10    1.09 
   2  -4   4   29.47    1.10 
  -2   4   4   27.24    1.09 
  -2  -4  -4   28.30    1.11 
  -2   4  -4   20.79    0.83 
   2   4   4   21.53    0.84 
  -2   4  -4   22.09    0.84 
   2  -4  -4   22.04    0.96 
  -3   4   4   20.71    0.84 
   3   4  -4   22.25    0.85 
  -3   4   4   20.52    1.00 
  -3   4   4   22.46    0.83 
  -3   4   4   21.38    0.84 
   3  -4   4   21.54    0.87 
  -3  -4  -4   20.79    0.77 
  -3  -4  -4   20.93    0.88 
   3   4  -4   20.95    0.84 
  -3  -4   4   17.59    0.64 
  -3   4  -4   17.21    0.64 
  -3  -4   4   16.63    0.65 
   3   4   4   17.53    0.68 
  -3   4  -4   16.15    0.81 
  -3   4  -4   17.50    0.69 
  -3   4  -4   16.74    0.65 
  -3   4  -4   17.55    0.71 
   3  -4  -4   16.41    0.75 
  -4   4   4   17.36    0.86 
   4   4  -4   16.29    0.67 
  -4   4   4   16.32    0.67 
  -4  -4  -4   15.01    0.66 
   4  -4   4   14.46    0.70 
  -4   4   4   17.64    0.81 
  -4  -4  -4   16.27    0.59 
   4  -4  -4   12.99    0.67 
   4   4   4   14.24    0.57 
  -4  -4   4   14.12    0.54 
  -4  -4   4   13.29    0.56 
  -4   4  -4   13.83    0.74 
  -4   4  -4   15.33    0.74 
  -4   4  -4   14.54    0.58 
  -5   4   4  103.24    3.80 
  -5   4   4  104.89    3.79 
  -5   4   4  108.12    3.63 
  -5  -4  -4  106.08    3.63 
  -5  -4   4   99.94    3.39 
  -5   4  -4   99.15    3.42 
  -5  -4   4   99.42    3.33 
  -6   4   4   23.43    0.92 
  -6   4   4   23.76    1.01 
  -6   4   4   23.69    0.93 
  -6  -4  -4   24.34    0.94 
  -6   4  -4   26.29    1.06 
  -6  -4   4   27.27    1.04 
  -6   4  -4   26.87    1.04 
  -6   4  -4   33.27    1.53 
  -7   4   4   11.13    0.57 
  -7   4   4   12.65    0.49 
  -7   4   4   12.13    0.51 
  -7   4  -4   16.27    0.62 
  -7   4  -4   16.77    0.67 
   0   5   4   60.78    2.18 
   0   5   4   60.86    2.16 
   0   5  -4   60.96    2.26 
   0   5  -4   60.51    2.14 
   0  -5  -4   61.21    2.15 
   0  -5  -4   59.19    2.15 
   0  -5  -4   62.12    2.21 
   1   5  -4  110.43    3.78 
  -1   5   4  108.48    3.70 
  -1  -5  -4  111.61    3.66 
  -1  -5  -4  105.52    3.62 
  -1  -5  -4  106.94    3.75 
   1   5  -4  106.28    3.68 
  -1  -5  -4   96.84    3.66 
   1   5  -4  112.31    3.72 
  -1   5  -4   99.05    3.48 
   1   5   4  102.97    3.53 
  -1   5  -4  103.42    3.62 
   1   5   4  102.58    3.51 
   1  -5  -4   99.75    3.55 
  -2  -5  -4   13.40    0.54 
  -2  -5  -4   13.91    0.65 
  -2   5   4   14.79    0.82 
  -2   5   4   13.52    0.79 
  -2   5   4   12.77    0.60 
  -2  -5  -4   13.54    0.56 
   2   5  -4   14.25    0.63 
   2   5  -4   13.84    0.60 
  -2  -5  -4   12.71    0.57 
   2   5   4   10.06    0.49 
  -2  -5   4    9.29    0.42 
  -2   5  -4   10.97    0.49 
  -2  -5   4    9.70    0.42 
  -2   5  -4   10.69    0.50 
  -2  -5   4   10.20    0.39 
  -2   5  -4    9.44    0.61 
   3  -5   4   42.36    1.57 
  -3   5   4   39.48    1.73 
  -3  -5  -4   42.43    1.58 
   3   5  -4   41.08    1.51 
   3   5  -4   38.02    1.52 
  -3   5   4   40.50    1.49 
  -3  -5  -4   41.40    1.43 
  -3   5   4   39.55    1.51 
  -3   5   4   41.40    1.52 
  -3  -5   4   42.16    1.53 
   3   5   4   43.65    1.58 
  -3   5  -4   41.52    1.56 
  -3   5  -4   42.29    1.75 
  -3  -5   4   41.93    1.48 
  -3   5  -4   42.59    1.59 
  -3  -5   4   43.76    1.51 
  -3  -5   4   43.30    1.50 
  -4  -5  -4   53.48    1.90 
   4  -5   4   54.08    1.99 
  -4   5   4   54.32    1.79 
   4   5  -4   50.56    1.93 
  -4   5   4   55.36    2.16 
  -4  -5  -4   54.43    1.82 
  -4   5   4   49.42    2.05 
  -4  -5   4   51.77    1.77 
   4   5   4   49.28    1.80 
  -4   5  -4   51.45    2.01 
   4  -5  -4   46.14    1.91 
  -4   5  -4   50.50    1.98 
  -4  -5   4   51.94    1.74 
  -5   5   4   26.57    1.01 
  -5   5   4   26.34    1.02 
  -5   5   4   25.91    1.19 
  -5   5   4   25.33    1.01 
  -5   5   4   24.17    1.08 
  -5   5   4   25.21    1.06 
  -5   5   4   25.45    1.00 
  -5  -5  -4   27.65    1.02 
  -5   5  -4   21.85    0.86 
  -5   5  -4   22.22    1.04 
  -5  -5   4   22.29    0.81 
  -5  -5   4   22.93    0.87 
  -5   5  -4   22.84    0.89 
  -5   5  -4   24.91    0.93 
  -5   5  -4   22.43    0.98 
  -5   5  -4   22.27    1.06 
  -6   5   4   35.57    1.37 
  -6   5   4   37.93    1.38 
  -6   5   4   39.25    1.45 
  -6   5   4   37.64    1.45 
  -6  -5  -4   39.56    1.40 
  -6  -5   4   36.59    1.33 
  -6   5  -4   34.13    1.41 
  -6   5  -4   40.03    1.35 
  -6   5  -4   37.06    1.35 
  -7   5   4   29.28    1.08 
  -7   5   4   30.46    1.06 
  -7   5  -4   27.00    0.99 
  -7   5  -4   27.55    0.98 
   0  -6  -4  152.80    5.25 
   0   6  -4  154.52    5.15 
   0  -6  -4  151.48    5.19 
   0   6   4  155.73    5.18 
   0  -6  -4  148.86    5.16 
   0  -6   4  142.67    5.15 
  -1  -6  -4   82.27    2.80 
   1   6  -4   84.52    2.90 
  -1  -6  -4   77.83    2.87 
  -1  -6  -4   83.07    2.91 
   1   6  -4   85.12    2.94 
  -1   6   4   80.25    2.91 
  -1  -6  -4   83.90    2.98 
  -1  -6   4   95.02    3.17 
   1   6   4   90.31    3.19 
  -1  -6   4   89.64    3.11 
  -1  -6   4   90.46    3.09 
  -1   6  -4   92.65    3.16 
   1  -6  -4   88.64    3.25 
   1   6   4   87.98    3.21 
   2   6  -4   19.13    0.85 
  -2  -6  -4   18.20    0.75 
  -2   6   4   20.27    1.07 
  -2  -6  -4   19.78    0.78 
  -2   6   4   18.97    0.83 
  -2  -6  -4   19.72    0.90 
  -2  -6  -4   20.07    0.82 
   2   6  -4   20.24    0.83 
   2   6   4   21.56    0.90 
  -2  -6   4   20.62    0.84 
  -2  -6   4   19.77    0.81 
  -2   6  -4   19.99    0.88 
  -2  -6   4   20.54    0.79 
  -2  -6   4   20.41    0.78 
  -2   6  -4   20.23    1.04 
  -3   6   4   65.11    2.33 
   3   6  -4   65.97    2.37 
  -3  -6  -4   67.52    2.28 
  -3   6   4   66.23    2.64 
  -3   6   4   68.37    2.38 
  -3  -6  -4   62.59    2.44 
  -3  -6   4   63.74    2.14 
  -3  -6   4   60.66    2.13 
  -3  -6   4   61.59    2.17 
  -3   6  -4   60.39    2.43 
  -3   6  -4   60.79    2.14 
  -4   6   4    4.08    0.35 
  -4   6   4    3.89    0.28 
  -4   6   4    4.12    0.38 
  -4   6   4    4.29    0.29 
  -4   6   4    4.29    0.48 
  -4  -6  -4    4.16    0.22 
  -4  -6  -4    3.93    0.27 
  -4   6  -4    3.31    0.31 
  -4  -6   4    3.22    0.22 
  -4   6  -4    2.95    0.38 
  -4   6  -4    3.26    0.26 
  -4   6  -4    3.55    0.29 
  -4   6  -4    3.28    0.35 
   4  -6  -4    3.52    0.57 
  -4  -6   4    3.38    0.21 
  -4   6  -4    3.09    0.29 
  -5  -6  -4   16.20    0.69 
  -5   6   4   16.60    0.70 
  -5   6   4   16.19    0.68 
  -5   6   4   16.60    0.75 
  -5   6   4   16.92    0.70 
  -5   6   4   17.06    0.77 
  -5   6   4   15.88    0.69 
  -5   6   4   17.01    0.86 
  -5  -6   4   13.55    0.50 
  -5   6  -4   14.56    0.69 
  -5   6  -4   13.70    0.74 
  -5   6  -4   12.82    0.58 
  -5   6  -4   14.34    0.58 
  -5   6  -4   13.66    0.67 
  -5  -6   4   13.04    0.56 
  -5   6  -4   13.78    0.61 
  -6   6   4   24.68    0.98 
  -6   6   4   25.05    0.92 
  -6   6   4   25.31    0.93 
  -6   6   4   23.95    0.92 
  -6   6  -4   25.94    0.89 
  -6   6  -4   22.03    0.91 
   6  -6  -4   20.23    1.22 
   0   7   4   26.32    1.07 
   0   7  -4   26.39    1.05 
   0  -7  -4   25.81    1.10 
   0  -7   4   26.82    1.06 
   0  -7  -4   24.01    1.00 
  -1  -7  -4   42.89    1.61 
   1   7  -4   42.62    1.59 
  -1   7   4   40.26    1.60 
  -1   7  -4   39.74    1.50 
  -1  -7   4   40.07    1.42 
  -1  -7   4   40.04    1.44 
   1   7   4   39.47    1.53 
  -1  -7   4   40.10    1.51 
  -2   7   4    6.25    0.36 
   2  -7   4    7.47    0.67 
  -2  -7  -4    6.21    0.42 
  -2  -7  -4    6.25    0.38 
  -2   7   4    6.42    0.41 
   2   7  -4    6.86    0.40 
  -2  -7  -4    6.70    0.43 
  -2  -7  -4    6.88    0.40 
  -2  -7  -4    6.33    0.38 
  -2  -7  -4    6.72    0.36 
  -2   7   4    6.13    0.46 
  -2  -7  -4    6.13    0.38 
  -2  -7   4    4.27    0.37 
  -2   7  -4    4.18    0.38 
  -2  -7   4    4.39    0.32 
  -2  -7   4    4.41    0.31 
   2  -7  -4    3.80    0.43 
   2  -7  -4    3.55    0.45 
  -2  -7   4    3.95    0.25 
  -2   7  -4    4.12    0.46 
  -2   7  -4    3.73    0.28 
  -2  -7   4    4.04    0.32 
   2  -7  -4    4.17    0.39 
  -3   7   4   20.16    0.88 
  -3   7   4   21.13    0.85 
  -3  -7  -4   20.70    0.81 
   3  -7   4   22.32    1.22 
  -3   7   4   21.88    0.97 
  -3   7   4   20.26    0.92 
  -3  -7  -4   20.89    0.76 
  -3   7   4   21.04    1.12 
  -3   7   4   20.89    0.83 
  -3   7   4   21.67    1.29 
   3   7  -4   20.25    0.87 
  -3  -7   4   23.24    0.93 
  -3  -7   4   23.50    0.90 
  -3   7  -4   24.05    0.94 
  -3   7  -4   22.45    1.00 
  -3   7  -4   23.61    1.00 
   3  -7  -4   23.69    1.25 
  -3   7  -4   21.56    1.26 
  -3   7  -4   24.23    1.17 
  -3   7  -4   24.38    0.89 
  -3  -7   4   24.47    0.89 
  -3  -7   4   24.25    0.91 
  -4  -7  -4   41.84    1.47 
  -4   7   4   42.26    1.52 
   4  -7   4   38.99    1.88 
  -4   7   4   43.92    1.81 
  -4   7   4   42.95    1.54 
  -4   7   4   44.18    1.64 
  -4   7   4   42.38    1.62 
   4  -7  -4   36.72    1.65 
  -4  -7   4   33.09    1.25 
  -4   7  -4   33.69    1.36 
  -4   7  -4   36.47    1.52 
  -4   7  -4   34.99    1.37 
  -4   7  -4   33.18    1.31 
   5  -7   4   24.94    1.26 
  -5   7   4   23.57    0.91 
  -5   7   4   24.06    0.91 
  -5   7   4   23.60    0.97 
  -5   7   4   24.65    0.90 
  -5   7   4   23.21    0.97 
  -5   7  -4   28.98    0.97 
  -5   7  -4   23.24    1.01 
  -5   7  -4   22.49    0.95 
   5  -7  -4   23.75    1.24 
  -5   7  -4   29.13    1.06 
  -6   7   4   18.63    0.82 
  -6   7   4   19.95    0.86 
   6  -7   4   22.13    1.02 
  -6   7   4   23.80    0.79 
  -6   7  -4   29.15    1.13 
   6  -7  -4   34.15    1.31 
  -6   7  -4   27.90    1.08 
   0  -8  -4   48.37    1.93 
   0  -8   4   53.14    2.30 
   0  -8   4   47.35    1.77 
   0  -8   4   50.50    1.84 
   0  -8  -4   53.20    1.90 
   0  -8   4   49.71    1.95 
   0  -8  -4   52.45    1.85 
   0   8   4   49.81    2.15 
   0   8  -4   55.28    2.13 
   0  -8   4   47.52    1.86 
   0  -8  -4   47.92    2.12 
   0  -8   4   49.29    1.85 
   0  -8   4   50.37    1.79 
   0  -8  -4   51.01    1.74 
   0  -8  -4   49.63    1.88 
  -1  -8  -4   15.24    0.72 
  -1  -8  -4   15.68    0.76 
   1  -8   4   16.90    0.83 
   1   8  -4   16.36    0.98 
  -1  -8  -4   16.08    0.73 
   1  -8   4   15.21    0.81 
  -1  -8  -4   15.46    0.69 
  -1  -8  -4   14.37    0.70 
   1  -8  -4   16.18    0.80 
   1  -8  -4   15.04    0.69 
  -1  -8   4   16.70    0.73 
  -1  -8   4   16.24    0.80 
  -1  -8   4   16.38    0.71 
   1  -8  -4   15.91    0.73 
   1   8   4   15.92    1.02 
  -1  -8   4   15.88    0.64 
   1  -8  -4   15.76    0.70 
   2  -8   4   12.08    0.64 
  -2  -8  -4   12.54    0.56 
  -2  -8  -4   11.27    0.58 
  -2  -8  -4   11.31    0.53 
  -2  -8  -4   11.27    0.57 
  -2  -8  -4   11.06    0.50 
   2   8  -4   12.33    0.85 
  -2  -8  -4   12.29    0.56 
  -2  -8   4   10.00    0.51 
  -2  -8   4   10.16    0.45 
   2  -8  -4   10.21    0.55 
  -2  -8   4   11.76    0.53 
  -2  -8   4   10.92    0.57 
  -2   8  -4   10.50    0.60 
  -2  -8   4   10.38    0.51 
  -3   8   4    4.28    0.32 
  -3   8   4    4.56    0.49 
  -3   8   4    5.00    0.37 
  -3   8   4    4.80    0.28 
  -3   8   4    4.05    0.23 
   3  -8   4    4.35    0.39 
   3  -8   4    4.06    0.49 
  -3  -8   4    6.99    0.38 
  -3  -8   4    6.85    0.31 
   3  -8  -4    7.34    0.48 
  -3   8  -4    7.34    0.68 
   4  -8   4    6.85    0.54 
  -4   8   4    6.80    0.34 
  -4   8   4    6.00    0.31 
  -4   8   4    6.36    0.36 
   4  -8   4    7.37    0.51 
  -4   8   4    6.46    0.38 
  -4   8   4    6.58    0.40 
  -4   8  -4    9.30    0.49 
  -4   8  -4   10.89    0.48 
   4  -8  -4    7.69    0.53 
  -5   8   4    0.15    0.08 
   0  -9   4   48.04    1.67 
   0  -9   4   45.12    1.75 
   0  -9  -4   42.83    1.73 
   0   9   4   47.28    1.92 
   0  -9  -4   47.45    1.67 
   0  -9  -4   47.70    1.71 
   1  -9   4   52.01    1.89 
  -1  -9  -4   51.75    1.79 
  -1  -9  -4   51.23    1.83 
  -1  -9  -4   52.91    1.78 
   1   9  -4   45.40    1.99 
  -1  -9  -4   57.27    1.86 
   1  -9   4   42.59    2.15 
  -1  -9   4   47.89    1.93 
   1   9   4   50.95    2.11 
  -1  -9   4   54.60    1.86 
  -1  -9   4   55.18    1.85 
   1  -9  -4   52.85    1.91 
   1  -9  -4   49.94    1.87 
   1  -9  -4   50.05    1.82 
  -2  -9  -4    8.12    0.48 
  -2  -9  -4    7.81    0.37 
  -2   9   4    7.28    0.64 
   2  -9   4    6.99    0.44 
   2   9  -4    7.38    0.57 
   2  -9   4    6.40    0.76 
   2  -9  -4    8.06    0.45 
  -2  -9   4    7.64    0.38 
  -2  -9   4    8.39    0.41 
   2   9   4    7.86    0.59 
   2  -9  -4    7.36    0.41 
   2  -9  -4    6.42    0.62 
  -2  -9   4    8.22    0.35 
   3  -9   4   11.32    0.57 
   3   9  -4   12.04    0.66 
  -3   9   4   10.09    0.51 
  -3   9  -4   12.90    0.59 
   3   9   4   12.51    0.75 
   3  -9  -4   14.49    0.84 
  -3  -9   4   13.46    0.54 
   3  -9  -4   12.88    0.60 
   0   0   5    0.03    0.08 
   0   0  -5    0.07    0.06 
   0   0  -5    0.06    0.08 
   0   0  -5    0.06    0.05 
   0   0   5    0.02    0.07 
   0   0  -5    0.02    0.06 
   0   0   5    0.27    0.08 
   0   0  -5    0.07    0.06 
   0   0   5    0.14    0.09 
   0   0  -5    0.11    0.08 
   1   0   5   18.87    0.75 
  -1   0  -5   19.21    0.72 
  -1   0  -5   19.83    0.69 
   1   0  -5   17.42    0.72 
  -1   0  -5   19.63    0.68 
  -1   0   5   20.52    0.79 
  -1   0   5   19.18    0.69 
  -1   0  -5   19.09    0.78 
   1   0  -5   19.12    0.78 
   1   0   5   19.09    0.77 
  -1   0  -5   19.41    0.75 
  -1   0  -5   18.72    0.75 
  -1   0  -5   19.39    0.78 
  -1   0  -5   18.93    0.68 
   1   0  -5   19.27    0.78 
  -1   0   5   20.73    0.79 
  -2   0  -5    2.12    0.12 
  -2   0   5    1.82    0.11 
  -2   0  -5    1.99    0.15 
  -2   0  -5    1.95    0.12 
   2   0  -5    1.94    0.13 
  -2   0   5    2.00    0.12 
   2   0   5    1.93    0.17 
  -2   0   5    1.84    0.17 
  -2   0   5    1.98    0.10 
  -2   0  -5    2.18    0.11 
   2   0   5    1.96    0.11 
  -2   0  -5    1.95    0.17 
   2   0  -5    1.99    0.19 
  -3   0   5  275.81    9.12 
   3   0   5  279.33    9.12 
   3   0  -5  284.24    9.16 
  -3   0   5  262.19    9.11 
  -3   0  -5  281.67    9.24 
  -3   0   5  262.59    9.18 
  -3   0  -5  282.38    9.13 
  -4   0  -5  160.03    5.47 
  -4   0  -5  161.37    5.35 
   4   0  -5  163.30    5.38 
  -4   0  -5  154.36    5.47 
  -5   0  -5   97.55    3.54 
   5   0  -5  106.65    3.45 
  -5   0  -5   96.74    3.58 
  -6   0   5    6.36    0.25 
  -6   0  -5    5.92    0.35 
  -6   0  -5    5.74    0.46 
  -7   0  -5    2.31    0.23 
  -7   0   5    2.14    0.28 
  -7   0   5    2.34    0.32 
  -7   0  -5    2.36    0.21 
  -8   0   5    7.84    0.46 
   0   1   5    1.11    0.15 
   0   1  -5    1.30    0.11 
   0   1  -5    0.99    0.14 
   0   1  -5    1.20    0.11 
   0   1  -5    1.10    0.11 
   0  -1  -5    1.09    0.14 
   0  -1  -5    0.99    0.10 
   0   1  -5    1.07    0.15 
   0  -1   5    1.12    0.10 
   0  -1  -5    1.32    0.14 
   0  -1   5    1.25    0.16 
   0  -1   5    1.02    0.14 
   0   1  -5    1.15    0.15 
   0   1   5    1.10    0.14 
   0  -1   5    1.11    0.14 
  -1   1   5  775.60   26.01 
   1   1  -5  745.33   25.94 
  -1  -1  -5  797.46   25.88 
  -1   1   5  808.28   25.84 
   1  -1  -5  736.32   24.81 
  -1  -1   5  747.05   24.78 
   1   1   5  736.32   24.95 
  -1   1  -5  756.50   24.84 
   1  -1  -5  683.68   24.95 
  -1   1  -5  763.69   24.84 
  -1  -1   5  770.85   24.98 
  -1   1  -5  810.70   24.80 
  -2   1   5   17.13    0.72 
   2  -1   5   17.22    0.62 
  -2  -1  -5   17.51    0.66 
  -2  -1  -5   17.82    0.68 
  -2  -1  -5   17.71    0.65 
   2  -1   5   16.25    0.71 
   2   1  -5   17.07    0.64 
   2   1  -5   17.04    0.73 
  -2   1   5   17.88    0.63 
  -2   1   5   16.89    0.63 
  -2  -1  -5   16.14    0.59 
   2   1   5   15.98    0.58 
  -2  -1   5   15.54    0.57 
  -2  -1   5   16.53    0.58 
  -2  -1   5   16.37    0.68 
  -2   1  -5   15.96    0.65 
  -2   1  -5   16.26    0.55 
  -2   1  -5   15.30    0.66 
  -2  -1   5   16.17    0.67 
  -2   1  -5   16.12    0.62 
  -2   1  -5   16.77    0.65 
   2   1   5   15.87    0.65 
   2  -1  -5   16.05    0.62 
  -2   1  -5   16.21    0.58 
   2   1   5   15.48    0.64 
  -3  -1  -5  288.21    9.68 
  -3  -1  -5  289.18    9.58 
   3   1  -5  292.23    9.60 
  -3   1   5  283.93    9.58 
   3  -1   5  290.95    9.58 
   3   1   5  286.64    9.25 
  -3   1  -5  288.05    9.37 
  -3  -1   5  267.71    9.25 
  -3   1  -5  278.30    9.24 
  -3  -1   5  281.85    9.36 
   3  -1  -5  276.75    9.31 
  -3   1  -5  277.30    9.26 
   4   1  -5  103.79    3.55 
  -4  -1  -5  104.49    3.65 
  -4  -1  -5  103.87    3.66 
  -4  -1  -5  104.45    3.53 
   4  -1   5  103.57    3.53 
  -4   1   5  107.17    3.49 
   4  -1  -5  103.01    3.44 
  -4   1  -5   97.85    3.51 
  -4   1  -5   98.53    3.51 
  -4  -1   5  101.67    3.35 
   5   1  -5    6.67    0.34 
  -5  -1  -5    6.77    0.42 
  -5  -1  -5    7.05    0.34 
  -5  -1  -5    6.86    0.46 
  -5   1  -5    6.91    0.45 
  -5  -1   5    6.45    0.27 
  -5  -1   5    6.53    0.30 
   5  -1  -5    6.36    0.36 
  -5   1  -5    6.61    0.42 
  -6  -1  -5   16.97    0.72 
  -6  -1   5   15.53    0.62 
  -6   1  -5   15.38    0.67 
  -6   1  -5   15.67    0.82 
  -7   1   5   34.32    1.37 
  -7   1   5   30.60    1.28 
  -7   1   5   32.17    1.28 
  -7  -1   5   31.82    1.31 
  -7   1  -5   33.46    1.24 
  -7   1  -5   32.91    1.19 
  -7  -1   5   32.61    1.53 
  -8   1   5    2.80    0.28 
   0  -2  -5  282.57    9.00 
   0   2  -5  269.54    9.15 
   0   2  -5  257.76    9.01 
   0  -2  -5  266.63    9.11 
   0  -2  -5  267.63    8.99 
   0   2  -5  274.37    9.05 
   0  -2   5  277.89    9.15 
   0  -2  -5  272.56    9.11 
  -1   2   5    0.90    0.12 
  -1  -2  -5    0.74    0.11 
  -1   2   5    0.82    0.15 
  -1  -2  -5    0.76    0.09 
   1   2  -5    0.85    0.10 
  -1   2   5    0.97    0.11 
   1  -2   5    0.85    0.09 
  -1   2   5    0.80    0.15 
  -1  -2  -5    0.71    0.13 
  -1  -2  -5    0.66    0.12 
  -1  -2  -5    0.68    0.10 
  -1  -2  -5    0.80    0.08 
  -1  -2   5    0.73    0.14 
   1   2   5    0.64    0.08 
  -1   2  -5    0.59    0.10 
   1  -2  -5    0.70    0.10 
  -1  -2   5    0.68    0.14 
  -1   2  -5    0.62    0.14 
  -1   2  -5    0.66    0.10 
  -1  -2   5    0.67    0.07 
  -1   2  -5    0.63    0.14 
   2  -2   5  137.80    4.53 
  -2   2   5  132.21    4.53 
  -2  -2  -5  137.20    4.48 
  -2  -2  -5  137.54    4.56 
  -2   2   5  133.37    4.66 
   2   2  -5  131.26    4.53 
  -2  -2  -5  133.09    4.57 
  -2   2   5  140.13    4.54 
  -2  -2  -5  133.61    4.56 
  -2  -2  -5  133.86    4.48 
  -2  -2   5  123.56    4.19 
  -2   2  -5  129.18    4.29 
  -2  -2   5  125.58    4.33 
   2  -2  -5  127.75    4.26 
  -2   2  -5  121.81    4.33 
  -2   2  -5  124.26    4.21 
  -2   2  -5  129.18    4.35 
   2   2   5  125.34    4.21 
  -2   2  -5  124.59    4.27 
  -2   2  -5  125.10    4.22 
   2   2   5  125.78    4.31 
  -2  -2   5  128.03    4.31 
  -3   2   5   25.08    0.88 
  -3  -2  -5   25.05    0.98 
  -3   2   5   24.90    0.92 
   3  -2   5   24.30    0.92 
  -3  -2  -5   25.88    0.90 
  -3  -2  -5   25.34    0.95 
   3   2  -5   24.23    0.92 
  -3   2   5   24.77    0.91 
   3   2   5   27.21    0.94 
  -3   2  -5   26.79    1.03 
   3  -2  -5   25.88    1.01 
  -3  -2   5   26.65    0.93 
  -3   2  -5   27.38    0.94 
  -3   2  -5   25.01    1.04 
  -4  -2  -5   18.87    0.70 
   4   2  -5   18.59    0.71 
   4  -2   5   18.24    0.71 
  -4   2   5   17.23    0.67 
   4  -2  -5   18.30    0.77 
  -4   2  -5   18.67    0.84 
  -4   2  -5   19.20    0.82 
  -4  -2   5   18.68    0.70 
  -4  -2   5   18.79    0.67 
  -5  -2  -5   65.93    2.37 
   5   2  -5   69.10    2.37 
   5  -2   5   66.83    2.37 
  -5  -2  -5   70.59    2.37 
   5  -2  -5   68.43    2.37 
  -5   2  -5   66.03    2.47 
  -5   2  -5   66.03    2.41 
  -5  -2   5   65.28    2.28 
  -5  -2   5   64.97    2.23 
  -6   2   5   76.46    2.64 
  -6   2   5   77.07    2.77 
  -6   2   5   78.73    2.84 
  -6  -2  -5   74.38    2.65 
  -6  -2   5   76.27    2.78 
  -6   2  -5   74.24    2.65 
  -6  -2   5   75.96    2.64 
  -6   2  -5   79.49    2.88 
  -6   2  -5   78.00    2.69 
  -7   2   5    8.03    0.47 
  -7   2   5    7.15    0.50 
  -7   2   5    7.29    0.45 
  -7   2   5    7.14    0.33 
  -7   2  -5    7.91    0.41 
  -7  -2   5    7.30    0.46 
  -7   2  -5    7.47    0.36 
  -7  -2   5    6.66    0.34 
  -8   2   5   58.30    2.11 
  -8   2   5   61.48    2.17 
  -8   2  -5   55.49    1.92 
   0   3  -5  204.87    6.56 
   0  -3  -5  192.85    6.54 
   0  -3  -5  193.00    6.54 
   0  -3  -5  193.75    6.70 
   0  -3  -5  195.19    6.57 
   0   3   5  193.23    6.56 
   0   3  -5  201.85    6.62 
   0  -3   5  193.10    6.50 
  -1  -3  -5  157.39    5.19 
  -1  -3  -5  155.48    5.26 
  -1  -3  -5  157.57    5.26 
  -1  -3  -5  158.22    5.34 
   1   3  -5  157.32    5.30 
   1  -3   5  160.61    5.24 
   1   3  -5  143.25    5.23 
  -1   3   5  155.17    5.26 
  -1  -3  -5  162.56    5.21 
  -1  -3  -5  150.10    5.32 
  -1  -3   5  140.38    4.98 
  -1   3  -5  144.23    4.83 
  -1   3  -5  145.65    4.90 
   1   3   5  149.67    4.83 
  -1   3  -5  135.49    4.83 
  -1  -3   5  149.18    4.78 
  -1  -3   5  139.30    4.99 
  -1   3  -5  144.51    5.03 
   1  -3  -5  143.73    4.84 
  -2  -3  -5  163.49    5.34 
  -2  -3  -5  162.42    5.35 
  -2   3   5  153.33    5.56 
  -2   3   5  155.16    5.40 
   2   3  -5  164.91    5.40 
  -2   3   5  160.39    5.40 
   2   3  -5  159.06    5.47 
  -2  -3  -5  160.79    5.43 
  -2   3   5  161.54    5.39 
   2  -3   5  162.85    5.40 
  -2  -3   5  145.68    4.89 
  -2   3  -5  143.40    5.03 
  -2   3  -5  142.38    5.13 
  -2   3  -5  147.94    4.93 
  -2   3  -5  152.22    4.94 
   2  -3  -5  151.81    4.98 
   2   3   5  143.98    4.93 
  -3   3   5   84.22    2.79 
  -3   3   5   84.03    2.82 
  -3  -3  -5   82.54    2.79 
  -3  -3  -5   80.43    2.86 
   3   3  -5   80.60    2.82 
  -3   3   5   81.04    2.82 
   3  -3   5   80.65    2.83 
   3   3   5   87.30    2.90 
  -3   3  -5   82.95    2.91 
  -3   3  -5   82.90    3.03 
   3  -3  -5   92.18    2.99 
  -3  -3   5   82.75    2.87 
  -3   3  -5   84.15    2.98 
  -4  -3  -5   21.24    0.75 
  -4  -3  -5   22.14    0.82 
   4  -3   5   22.13    0.87 
   4   3  -5   22.16    0.85 
  -4   3   5   21.67    1.00 
  -4   3   5   21.13    0.82 
  -4   3  -5   23.00    1.01 
   4  -3  -5   23.69    0.96 
  -4  -3   5   21.98    0.84 
  -4  -3   5   22.45    0.81 
  -4   3  -5   22.21    0.86 
  -4   3  -5   22.39    0.98 
  -4   3  -5   23.08    0.94 
  -4   3  -5   23.13    0.82 
  -5   3   5    9.90    0.57 
   5   3  -5    9.18    0.44 
   5  -3   5    9.60    0.47 
  -5  -3  -5    9.37    0.43 
  -5  -3  -5    8.83    0.44 
  -5  -3   5    9.52    0.37 
  -5  -3   5    9.11    0.42 
  -5   3  -5   10.06    0.60 
  -6   3   5  101.96    3.70 
  -6  -3  -5  104.59    3.56 
  -6   3   5  101.28    3.55 
  -6   3   5  106.66    3.65 
  -6   3   5  103.22    3.54 
  -6   3  -5   92.32    3.34 
  -6   3  -5   89.79    3.13 
  -6   3  -5   88.99    3.10 
  -6  -3   5   92.11    3.10 
  -6   3  -5   90.75    3.10 
  -7   3   5    9.06    0.40 
  -7   3   5    9.77    0.57 
  -7   3   5    9.81    0.52 
  -7   3  -5    5.48    0.32 
  -7   3  -5    4.96    0.28 
  -8   3   5    2.69    0.23 
  -8   3  -5    7.13    0.38 
   0   4   5    3.58    0.24 
   0   4  -5    3.30    0.22 
   0   4  -5    4.14    0.29 
   0  -4  -5    3.93    0.23 
   0  -4  -5    3.47    0.25 
   0  -4  -5    3.61    0.23 
   0   4   5    3.70    0.23 
  -1   4   5    5.63    0.28 
   1   4  -5    4.04    0.31 
   1   4  -5    4.51    0.27 
  -1  -4  -5    4.57    0.28 
  -1  -4  -5    4.35    0.22 
  -1  -4  -5    4.15    0.24 
  -1  -4  -5    4.27    0.22 
   1   4  -5    4.39    0.25 
  -1   4  -5    3.16    0.27 
  -1   4  -5    2.80    0.19 
   1   4   5    2.70    0.25 
  -1   4  -5    3.39    0.25 
   1  -4  -5    3.25    0.23 
   1   4   5    2.95    0.22 
  -1   4  -5    2.80    0.21 
  -2  -4  -5   56.55    1.94 
  -2   4   5   54.26    2.01 
  -2   4   5   58.32    2.00 
   2  -4   5   56.12    2.01 
   2   4  -5   56.35    1.99 
  -2  -4  -5   58.08    1.95 
  -2  -4  -5   57.50    1.93 
  -2  -4  -5   57.39    2.04 
   2   4  -5   53.39    2.07 
   2   4  -5   55.87    2.00 
  -2   4   5   55.28    2.00 
   2   4   5   62.36    2.14 
  -2  -4   5   57.50    2.08 
  -2   4  -5   62.66    2.13 
  -2   4  -5   60.24    2.13 
  -3   4   5   56.94    2.09 
  -3  -4  -5   58.68    2.17 
   3   4  -5   61.68    2.14 
  -3   4   5   58.24    2.31 
   3   4  -5   60.16    2.13 
   3  -4   5   61.91    2.16 
  -3   4   5   61.15    2.13 
  -3   4   5   61.80    2.14 
  -3  -4  -5   60.27    2.08 
  -3  -4  -5   60.04    2.05 
  -3   4  -5   62.92    2.16 
   3   4   5   64.63    2.22 
  -3   4  -5   61.37    2.21 
  -3  -4   5   62.38    2.18 
  -3   4  -5   65.19    2.24 
  -3   4  -5   63.89    2.39 
  -3   4  -5   64.08    2.18 
  -3  -4   5   63.26    2.17 
   3  -4  -5   63.25    2.30 
  -4   4   5   17.37    0.72 
  -4   4   5   17.34    0.61 
  -4  -4  -5   18.01    0.64 
  -4  -4  -5   16.89    0.71 
  -4  -4  -5   18.46    0.70 
   4  -4   5   18.23    0.77 
  -4   4   5   16.76    0.89 
   4   4  -5   17.68    0.74 
  -4   4  -5   17.03    0.69 
   4  -4  -5   17.84    0.83 
  -4   4  -5   17.83    0.87 
  -4  -4   5   17.37    0.69 
  -4   4  -5   19.15    0.75 
   4   4   5   18.92    0.71 
  -4   4  -5   17.77    0.86 
  -4  -4   5   17.63    0.67 
  -5  -4  -5   24.91    0.95 
  -5  -4  -5   21.89    1.03 
  -5   4   5   24.54    0.94 
  -5   4   5   24.69    1.10 
  -5   4  -5   26.36    1.02 
  -5  -4   5   26.58    0.99 
  -5  -4   5   25.93    0.94 
  -5   4  -5   27.80    1.21 
  -6   4   5    8.73    0.42 
  -6   4   5    8.54    0.42 
  -6  -4  -5    8.45    0.43 
  -6   4   5    8.12    0.48 
  -6   4  -5    7.60    0.38 
  -6   4  -5    7.36    0.36 
  -6  -4   5    7.09    0.36 
  -6   4  -5    7.25    0.35 
  -7   4   5   27.63    0.97 
  -7   4   5   25.28    0.98 
  -7   4   5   27.74    1.06 
  -7   4  -5   29.88    1.14 
  -7   4  -5   31.88    1.12 
   0   5   5    0.21    0.12 
   0  -5  -5    0.54    0.13 
   0  -5  -5    0.31    0.12 
   0   5   5    0.42    0.13 
   0   5  -5    0.31    0.13 
   0   5  -5    0.47    0.11 
   0  -5  -5    0.33    0.13 
   1   5  -5   60.80    2.12 
   1   5  -5   58.61    2.21 
  -1  -5  -5   60.65    2.18 
  -1  -5  -5   61.03    2.10 
  -1  -5  -5   59.38    2.13 
  -1  -5  -5   57.80    2.04 
  -1  -5  -5   57.03    2.04 
   1   5  -5   60.34    2.15 
  -1  -5  -5   59.91    2.15 
  -1   5   5   59.91    2.13 
   1   5   5   55.49    2.00 
  -1   5  -5   53.69    1.97 
  -1   5  -5   57.20    2.12 
   1   5   5   56.97    2.03 
   1  -5  -5   55.57    2.04 
  -2   5   5   62.28    2.55 
  -2  -5  -5   68.04    2.40 
  -2  -5  -5   64.72    2.29 
   2   5  -5   67.25    2.35 
  -2  -5  -5   65.65    2.27 
  -2  -5  -5   65.27    2.26 
   2   5  -5   67.81    2.33 
  -2   5   5   63.16    2.33 
   2   5   5   79.24    2.66 
  -2  -5   5   71.74    2.52 
  -2   5  -5   74.73    2.64 
  -2  -5   5   75.89    2.57 
  -2   5  -5   75.02    2.64 
  -2  -5   5   74.05    2.56 
  -2   5  -5   73.86    2.82 
   3  -5   5   13.28    0.66 
  -3   5   5   14.09    0.65 
  -3   5   5   14.60    0.64 
   3   5  -5   14.35    0.63 
  -3  -5  -5   13.98    0.69 
   3   5  -5   13.82    0.65 
  -3  -5  -5   14.78    0.60 
  -3  -5  -5   13.89    0.56 
  -3   5   5   14.47    0.63 
  -3   5   5   14.26    0.83 
  -3   5  -5   14.38    0.63 
  -3  -5   5   13.83    0.55 
   3   5   5   13.39    0.62 
  -3  -5   5   14.01    0.57 
  -3   5  -5   14.25    0.58 
  -3   5  -5   14.36    0.64 
  -3  -5   5   13.82    0.57 
  -3   5  -5   15.30    0.80 
  -4  -5  -5  151.58    5.06 
  -4   5   5  149.20    5.04 
  -4   5   5  152.57    5.43 
   4   5  -5  159.71    5.35 
  -4  -5  -5  145.58    5.14 
  -4  -5   5  151.99    5.05 
   4   5   5  134.71    5.11 
  -4   5  -5  153.29    5.28 
   4  -5  -5  147.83    5.24 
  -4   5  -5  157.37    5.32 
  -4  -5   5  155.17    5.04 
  -5   5   5   11.31    0.53 
  -5   5   5   11.88    0.53 
  -5  -5  -5   12.12    0.54 
  -5   5   5   11.83    0.70 
  -5   5   5   11.85    0.55 
  -5   5   5   11.17    0.58 
  -5   5   5   10.96    0.53 
  -5  -5   5   10.56    0.42 
  -5   5  -5   10.78    0.58 
  -5   5  -5   10.29    0.46 
  -5   5  -5   10.72    0.62 
  -5   5  -5   11.44    0.53 
  -5   5  -5   10.29    0.47 
  -5  -5   5   11.01    0.48 
  -6   5   5   40.87    1.55 
  -6   5   5   42.69    1.50 
  -6   5   5   40.27    1.48 
  -6   5   5   41.57    1.50 
  -6   5   5   40.67    1.55 
  -6  -5  -5   42.28    1.50 
  -6   5  -5   44.63    1.57 
  -6   5  -5   44.62    1.57 
  -6   5  -5   43.08    1.65 
  -7   5   5   13.52    0.57 
  -7   5   5   13.86    0.54 
  -7   5   5   13.40    0.53 
  -7   5  -5   15.33    0.56 
  -7   5  -5   14.05    0.57 
   0  -6  -5  102.27    3.65 
   0  -6   5  111.17    3.65 
   0  -6  -5   99.69    3.71 
   0   6   5  108.40    3.67 
   0   6  -5  108.58    3.64 
   0  -6  -5   99.52    3.67 
  -1  -6  -5    9.13    0.54 
  -1  -6  -5    8.92    0.38 
   1   6  -5    8.80    0.46 
  -1  -6  -5    8.22    0.44 
  -1   6   5    9.08    0.48 
  -1  -6  -5    8.89    0.47 
   1   6   5    9.03    0.49 
  -1  -6   5    8.00    0.39 
  -1   6  -5    7.47    0.41 
  -1  -6   5    8.28    0.43 
   1   6   5    7.66    0.44 
  -1  -6   5    8.17    0.37 
  -2  -6  -5   10.77    0.48 
  -2  -6  -5   10.97    0.51 
   2   6  -5   10.72    0.56 
  -2   6   5   10.85    0.54 
  -2  -6  -5    9.69    0.46 
   2   6  -5   11.05    0.53 
  -2   6   5   11.04    0.75 
  -2  -6  -5   10.52    0.60 
   2   6   5   13.16    0.64 
  -2   6  -5   13.03    0.78 
  -2  -6   5   14.33    0.60 
  -2   6  -5   12.94    0.63 
  -2  -6   5   13.62    0.55 
  -2   6  -5   11.09    0.65 
  -2  -6   5   13.33    0.59 
  -3   6   5   48.71    1.77 
   3   6  -5   46.87    1.76 
  -3   6   5   48.69    2.04 
  -3  -6  -5   48.08    1.68 
  -3   6   5   45.39    1.72 
  -3   6  -5   49.77    1.75 
  -3  -6   5   48.60    1.74 
  -3  -6   5   49.55    1.75 
  -3   6  -5   51.09    2.05 
  -3  -6   5   49.01    1.78 
  -4   6   5   26.34    1.06 
  -4  -6  -5   28.77    0.99 
  -4  -6  -5   27.52    1.05 
  -4   6   5   27.06    1.17 
  -4   6   5   27.66    1.32 
  -4   6  -5   30.21    1.25 
  -4  -6   5   29.21    1.05 
   4  -6  -5   28.75    1.53 
  -4   6  -5   25.35    1.14 
  -4   6  -5   26.75    1.02 
  -4  -6   5   30.14    1.03 
  -4   6  -5   27.89    1.11 
  -4   6  -5   28.75    1.18 
  -4   6  -5   27.31    1.27 
  -4   6  -5   27.41    1.08 
  -5   6   5   35.20    1.29 
  -5   6   5   35.72    1.37 
  -5  -6  -5   36.28    1.29 
  -5   6   5   34.41    1.45 
  -5   6   5   32.91    1.33 
  -5   6   5   34.30    1.29 
  -5   6   5   34.55    1.28 
  -5   6   5   34.71    1.29 
  -5   6  -5   29.76    1.20 
   5  -6  -5   33.78    1.65 
  -5   6  -5   30.32    1.15 
  -5  -6   5   33.04    1.16 
  -5   6  -5   32.89    1.28 
  -5   6  -5   31.92    1.33 
  -5  -6   5   31.23    1.10 
  -6   6   5   13.14    0.52 
  -6   6   5   12.24    0.57 
  -6   6   5   12.63    0.52 
  -6   6   5   12.10    0.51 
  -6   6  -5   12.89    0.59 
   6  -6  -5   12.33    0.87 
  -6   6  -5   13.80    0.54 
   0  -7   5    1.00    0.20 
   0   7   5    0.80    0.19 
   0  -7  -5    0.99    0.23 
   0   7  -5    1.21    0.19 
   0  -7  -5    1.33    0.22 
  -1   7   5  125.57    4.73 
  -1  -7  -5  131.55    4.55 
  -1  -7  -5  126.04    4.49 
   1   7  -5  126.99    4.86 
  -1  -7  -5  129.51    4.45 
  -1   7   5  131.01    4.50 
   1  -7   5  122.94    4.56 
  -1  -7  -5  136.65    4.50 
   1   7  -5  136.64    4.49 
  -1   7  -5  118.73    4.00 
   1  -7  -5  130.15    4.13 
  -1  -7   5  109.68    4.00 
  -1  -7   5  115.59    3.91 
  -1  -7   5  119.94    3.94 
  -1  -7   5  118.71    3.96 
   1  -7  -5  110.72    3.98 
   1   7   5  112.67    4.03 
   1  -7  -5  114.65    4.14 
  -1  -7   5  116.72    4.38 
  -1  -7   5  111.28    4.02 
  -1  -7   5  110.40    4.10 
  -2  -7  -5   12.40    0.55 
  -2  -7  -5   12.20    0.56 
  -2  -7  -5   11.85    0.57 
  -2   7   5    9.63    0.64 
  -2  -7  -5   11.17    0.55 
  -2  -7  -5   11.88    0.57 
  -2   7   5   12.13    0.67 
   2   7  -5   12.74    0.60 
  -2  -7  -5   12.60    0.63 
  -2   7   5   12.07    0.60 
   2  -7   5   13.31    0.84 
  -2  -7  -5   11.58    0.61 
  -2   7  -5   12.39    0.67 
  -2  -7   5   12.62    0.67 
  -2   7  -5   12.55    0.80 
  -2  -7   5   12.50    0.61 
  -2  -7   5   13.46    0.55 
   2  -7  -5   13.29    0.75 
  -2  -7   5   13.87    0.60 
  -2  -7   5   12.13    0.59 
  -3   7   5   61.01    2.44 
  -3   7   5   61.29    2.12 
   3  -7   5   66.19    2.62 
  -3   7   5   59.12    2.23 
  -3   7   5   61.58    2.61 
  -3  -7  -5   58.93    2.08 
  -3   7   5   50.21    2.21 
  -3   7   5   56.19    2.10 
  -3  -7   5   63.37    2.18 
   3  -7  -5   64.03    2.55 
  -3  -7   5   61.26    2.18 
  -3  -7   5   60.94    2.18 
  -3   7  -5   61.77    2.32 
  -3   7  -5   60.88    2.55 
  -3   7  -5   61.44    2.29 
  -3   7  -5   66.10    2.50 
  -3  -7   5   64.31    2.22 
  -3   7  -5   65.05    2.16 
  -3  -7   5   60.06    2.23 
  -4   7   5    1.04    0.25 
  -4   7   5    1.10    0.18 
  -4   7   5    1.22    0.19 
   4  -7   5    1.17    0.38 
  -4  -7  -5    1.04    0.15 
  -4   7   5    1.38    0.38 
  -4   7   5    1.13    0.23 
  -4  -7   5    1.04    0.16 
  -4   7  -5    1.57    0.33 
  -4  -7   5    1.07    0.14 
  -4   7  -5    1.22    0.23 
  -4   7  -5    1.55    0.26 
  -4   7  -5    1.34    0.20 
   4  -7  -5    1.23    0.35 
  -5   7   5    8.90    0.47 
  -5   7   5    9.07    0.41 
  -5   7   5    8.99    0.40 
  -5   7   5    8.86    0.41 
  -5   7   5    8.51    0.45 
   5  -7   5    8.97    0.69 
  -5   7  -5   11.47    0.56 
  -5   7  -5    9.65    0.45 
   5  -7  -5   10.45    0.70 
  -5   7  -5   10.23    0.44 
  -5   7  -5    8.44    0.49 
   0  -8   5    5.41    0.31 
   0  -8  -5    4.74    0.37 
   0  -8   5    4.36    0.34 
   0  -8   5    4.93    0.65 
   0  -8  -5    5.37    0.35 
   0  -8   5    5.45    0.37 
   0  -8  -5    5.64    0.40 
   0   8   5    5.33    0.55 
   0   8  -5    5.68    0.52 
   0  -8  -5    4.24    0.42 
   0  -8  -5    5.47    0.30 
   0  -8  -5    5.14    0.42 
   0  -8   5    5.20    0.36 
   0  -8   5    5.52    0.47 
   0  -8   5    4.76    0.28 
   1  -8   5   12.10    0.69 
   1   8  -5   11.99    0.80 
  -1  -8  -5   11.82    0.56 
  -1  -8  -5   12.77    0.61 
  -1  -8  -5   12.12    0.58 
  -1  -8  -5   12.28    0.61 
   1  -8   5   11.41    0.67 
  -1  -8  -5   12.05    0.63 
  -1  -8   5   12.44    0.53 
   1  -8  -5   12.21    0.67 
   1  -8  -5   13.62    0.99 
   1   8   5   12.97    0.90 
   1  -8  -5   13.35    0.71 
  -1  -8   5   12.96    0.61 
   1  -8  -5   12.39    0.62 
  -1  -8   5   12.21    0.60 
  -1  -8   5   13.17    0.70 
   1  -8  -5   12.07    0.58 
   1  -8  -5   12.46    0.59 
  -2  -8  -5    0.79    0.20 
  -2  -8  -5    0.98    0.16 
  -2  -8  -5    0.72    0.19 
  -2  -8  -5    0.64    0.16 
  -2  -8  -5    1.17    0.21 
   2   8  -5    0.79    0.34 
  -2  -8  -5    0.73    0.23 
  -2  -8   5    0.21    0.12 
  -2   8  -5    0.20    0.13 
  -2   8  -5    0.41    0.18 
  -2  -8   5    0.23    0.13 
  -2  -8   5    0.18    0.16 
   2  -8  -5    0.38    0.17 
  -2  -8   5    0.46    0.15 
  -2   8  -5    0.24    0.28 
  -3   8   5   47.29    1.78 
  -3   8   5   47.06    1.74 
   3  -8   5   43.87    1.85 
  -3   8   5   48.57    1.69 
  -3   8   5   49.72    2.02 
  -3  -8   5   50.94    1.77 
  -3   8  -5   53.70    1.94 
  -3  -8   5   49.85    1.83 
   4  -8   5    2.33    0.34 
  -4   8   5    2.57    0.26 
  -4   8   5    2.82    0.26 
  -4   8   5    2.59    0.22 
  -4   8   5    3.03    0.22 
   4  -8   5    2.66    0.35 
  -4   8   5    2.79    0.19 
  -4   8  -5    2.89    0.28 
  -4   8  -5    2.04    0.20 
  -4   8  -5    2.86    0.25 
   0  -9   5    1.34    0.27 
   0  -9  -5    0.87    0.20 
   0  -9  -5    0.64    0.21 
   0  -9  -5    0.76    0.18 
   0  -9  -5    1.06    0.24 
   1  -9   5    4.73    0.58 
  -1  -9  -5    4.93    0.34 
   1  -9   5    5.24    0.37 
  -1  -9  -5    5.26    0.35 
   1   9  -5    5.13    0.46 
  -1  -9  -5    5.13    0.30 
  -1  -9  -5    5.29    0.29 
   1  -9  -5    5.24    0.35 
   1  -9  -5    4.68    0.29 
  -1  -9   5    5.66    0.32 
  -1  -9   5    4.96    0.36 
   1   9   5    4.65    0.46 
   1  -9  -5    4.88    0.37 
  -1  -9   5    4.61    0.31 
  -2  -9  -5    6.72    0.34 
   2   9  -5    7.62    0.55 
  -2  -9  -5    5.89    0.35 
   2  -9   5    6.54    0.39 
  -2   9   5    5.02    0.55 
  -2  -9   5    4.43    0.23 
  -2   9  -5    4.56    0.34 
  -2  -9   5    3.95    0.27 
  -2  -9   5    4.49    0.30 
   2  -9  -5    3.45    0.45 
   2   9   5    4.25    0.44 
   2  -9  -5    4.81    0.34 
   3   9  -5    0.72    0.22 
  -3   9   5    0.66    0.17 
   3  -9   5    0.65    0.17 
   3  -9  -5    1.08    0.27 
  -3  -9   5    0.91    0.14 
   3   9   5    1.23    0.27 
   3  -9  -5    0.99    0.17 
  -3   9  -5    1.05    0.19 
   0   0  -6 1000.00   31.60 
   0   0   6  910.90   31.54 
  -1   0  -6  110.42    3.75 
  -1   0  -6  112.78    3.70 
  -1   0   6  115.04    3.83 
  -1   0   6  104.70    3.69 
  -1   0  -6  109.53    3.77 
  -1   0  -6  109.25    3.79 
  -1   0   6  109.57    3.83 
  -1   0  -6  107.56    3.70 
  -1   0  -6  116.63    3.81 
  -1   0   6  108.51    3.70 
  -1   0   6  112.97    3.72 
   1   0   6  111.20    3.81 
   2   0  -6   61.37    2.09 
   2   0   6   61.39    2.05 
  -2   0  -6   60.22    2.10 
  -2   0  -6   61.45    2.09 
  -2   0  -6   60.12    2.12 
  -2   0  -6   60.38    2.04 
  -2   0   6   60.93    2.18 
  -2   0  -6   61.25    2.13 
  -2   0   6   60.60    2.06 
  -2   0   6   59.97    2.04 
   2   0   6   58.41    2.15 
  -2   0   6   60.94    2.05 
  -3   0   6    0.32    0.06 
  -3   0  -6    0.29    0.08 
   3   0  -6    0.27    0.09 
  -3   0  -6    0.59    0.13 
  -3   0  -6    0.70    0.15 
  -3   0   6    0.35    0.08 
  -4   0  -6   89.84    2.98 
   4   0   6   86.35    2.96 
  -4   0  -6   86.62    3.10 
  -4   0  -6   89.16    3.12 
   4   0  -6   87.04    3.02 
  -5   0   6    4.88    0.22 
   5   0  -6    4.53    0.29 
  -5   0  -6    4.96    0.36 
  -5   0  -6    4.38    0.37 
  -6   0  -6    3.22    0.36 
  -6   0   6    3.63    0.18 
  -6   0  -6    3.94    0.33 
  -6   0  -6    4.09    0.28 
  -7   0   6    1.91    0.30 
  -7   0  -6    1.66    0.21 
  -7   0  -6    1.82    0.20 
  -7   0   6    1.55    0.25 
  -8   0   6   36.12    1.36 
   0  -1  -6   29.33    1.04 
   0  -1  -6   28.90    1.14 
   0   1  -6   30.45    1.06 
   0  -1  -6   27.65    1.04 
   0   1  -6   29.42    1.16 
   0  -1  -6   30.89    1.15 
   0   1  -6   30.43    1.16 
   0  -1   6   30.14    1.16 
   0   1  -6   29.07    1.05 
   0   1  -6   28.93    1.07 
   0  -1   6   30.24    1.05 
  -1   1   6  395.26   13.20 
  -1   1   6  416.24   13.34 
  -1   1   6  409.74   13.22 
  -1  -1  -6  400.28   13.20 
   1   1  -6  426.32   13.24 
  -1  -1  -6  391.33   13.22 
  -1  -1  -6  395.64   13.24 
  -1  -1  -6  398.27   13.19 
   1  -1   6  381.47   13.19 
  -1  -1  -6  376.15   13.28 
  -1  -1  -6  396.85   13.31 
  -1  -1   6  372.44   12.89 
  -1  -1   6  383.69   12.77 
  -1   1  -6  396.77   12.80 
  -1  -1   6  382.70   12.74 
  -1   1  -6  379.63   12.80 
  -1   1  -6  386.03   12.76 
  -1   1  -6  402.37   12.89 
  -1   1  -6  407.04   12.77 
  -1  -1   6  363.22   12.89 
   1   1   6  406.36   12.87 
  -1   1  -6  402.17   12.80 
  -1   1  -6  388.87   12.88 
   1   1   6  378.92   12.76 
  -1  -1   6  350.70   12.76 
   2  -1   6   29.18    1.06 
  -2  -1  -6   30.32    1.12 
  -2   1   6   29.97    1.19 
  -2   1   6   30.57    1.07 
  -2  -1  -6   29.75    1.06 
  -2  -1  -6   30.22    1.11 
  -2  -1  -6   29.85    1.10 
   2  -1   6   30.67    1.19 
  -2  -1  -6   30.51    1.03 
  -2   1   6   31.05    1.07 
   2   1  -6   28.81    1.08 
  -2   1  -6   38.73    1.42 
   2   1   6   37.54    1.43 
  -2  -1   6   38.38    1.46 
  -2   1  -6   39.17    1.40 
  -2  -1   6   39.87    1.35 
  -2   1  -6   38.82    1.35 
  -2   1  -6   39.59    1.46 
   2  -1  -6   38.20    1.39 
  -2   1  -6   40.70    1.44 
  -2  -1   6   38.69    1.33 
  -2  -1   6   38.94    1.48 
   2   1   6   39.49    1.35 
  -2   1  -6   39.72    1.32 
  -3   1   6  251.74    8.08 
  -3  -1  -6  241.17    8.08 
  -3  -1  -6  238.78    8.14 
  -3  -1  -6  242.19    8.19 
  -3   1   6  240.33    8.10 
   3  -1   6  244.06    8.08 
  -3   1   6  244.13    8.04 
   3   1  -6  244.28    8.11 
  -3   1   6  241.44    8.06 
   3  -1  -6  260.38    8.50 
   3   1   6  254.14    8.43 
  -3   1  -6  238.31    8.46 
  -3   1  -6  263.37    8.55 
  -3  -1   6  249.02    8.42 
  -3   1  -6  259.76    8.41 
  -4  -1  -6   61.07    2.10 
   4  -1   6   59.53    2.10 
  -4  -1  -6   60.70    2.23 
   4   1  -6   62.18    2.14 
  -4   1   6   61.93    2.07 
  -4  -1  -6   60.60    2.23 
  -4   1  -6   60.91    2.22 
  -4   1  -6   59.86    2.08 
   4  -1  -6   61.75    2.15 
  -4  -1   6   62.03    2.06 
  -4   1  -6   58.77    2.22 
  -5  -1  -6   91.21    3.02 
   5   1  -6   87.35    3.04 
  -5  -1  -6   87.91    3.13 
  -5  -1  -6   85.35    3.18 
  -5   1  -6   82.91    3.09 
  -5   1  -6   84.10    3.13 
   5  -1  -6   85.66    3.01 
  -5  -1   6   94.06    2.99 
  -5  -1   6   84.69    2.90 
  -6   1   6   15.93    0.90 
  -6  -1  -6   18.30    0.72 
  -6   1   6   17.33    0.75 
  -6  -1  -6   15.55    0.74 
  -6   1   6   17.11    0.83 
  -6   1  -6   15.98    0.68 
  -6   1  -6   16.03    0.75 
  -6   1  -6   16.28    0.82 
  -6  -1   6   12.43    0.83 
  -6   1  -6   15.61    0.67 
  -6  -1   6   15.67    0.55 
  -7   1   6   15.07    0.71 
  -7  -1  -6   14.64    0.61 
  -7   1   6   15.45    0.71 
  -7   1   6   14.37    0.76 
  -7  -1   6   15.29    0.74 
  -7   1  -6   16.93    0.65 
  -7   1  -6   15.71    0.68 
  -8   1   6   23.22    0.96 
   0  -2   6   23.05    0.85 
   0   2  -6   23.39    0.90 
   0  -2  -6   24.18    0.84 
   0   2  -6   23.63    0.86 
   0  -2  -6   23.39    0.87 
   0  -2  -6   23.03    0.85 
   0   2   6   23.14    0.85 
   0  -2   6   23.85    0.81 
   0  -2  -6   22.11    0.95 
   0  -2  -6   23.88    0.97 
   0   2  -6   22.33    0.85 
  -1  -2  -6   19.77    0.77 
   1   2  -6   19.81    0.75 
  -1   2   6   20.72    0.76 
  -1  -2  -6   20.53    0.72 
  -1  -2  -6   19.55    0.83 
   1  -2   6   20.02    0.74 
  -1   2   6   19.08    0.74 
  -1  -2  -6   19.18    0.71 
  -1  -2  -6   20.30    0.78 
   1   2  -6   19.53    0.79 
  -1  -2  -6   20.68    0.82 
  -1   2  -6   16.94    0.75 
  -1   2  -6   15.66    0.62 
  -1   2  -6   16.31    0.75 
  -1  -2   6   16.90    0.75 
  -1   2  -6   16.53    0.67 
   1  -2  -6   16.10    0.64 
  -1  -2   6   15.96    0.58 
  -1  -2   6   15.30    0.74 
  -1   2  -6   16.16    0.63 
  -1   2  -6   16.41    0.64 
   1   2   6   16.64    0.62 
  -2   2   6  103.41    3.64 
   2  -2   6  100.02    3.49 
  -2   2   6  100.82    3.50 
  -2  -2  -6  103.95    3.48 
  -2  -2  -6  103.69    3.47 
  -2  -2  -6  102.50    3.55 
  -2  -2  -6  103.06    3.45 
  -2  -2  -6  102.39    3.53 
  -2  -2  -6  107.46    3.59 
   2   2  -6  102.22    3.50 
  -2   2   6  105.77    3.50 
   2   2   6  105.78    3.50 
  -2   2  -6  103.74    3.63 
  -2  -2   6  100.99    3.47 
   2  -2  -6  102.77    3.55 
  -2   2  -6  106.84    3.49 
  -2   2  -6  104.04    3.66 
  -2   2  -6  105.04    3.50 
  -2   2  -6  101.57    3.57 
  -2  -2   6  101.60    3.63 
  -2   2  -6  103.57    3.56 
  -2  -2   6  106.27    3.65 
   3  -2   6   44.95    1.61 
  -3   2   6   44.76    1.57 
  -3  -2  -6   44.96    1.64 
  -3  -2  -6   46.23    1.68 
   3   2  -6   46.61    1.62 
  -3   2   6   46.39    1.60 
  -3  -2  -6   46.72    1.58 
  -3   2   6   43.82    1.61 
   3  -2  -6   49.47    1.73 
  -3   2  -6   47.08    1.75 
  -3   2  -6   48.64    1.65 
  -3  -2   6   47.32    1.63 
   3   2   6   46.40    1.65 
   4   2  -6  128.33    4.36 
   4  -2   6  129.15    4.35 
  -4  -2  -6  126.72    4.33 
  -4   2   6  127.54    4.31 
  -4   2   6  129.66    4.48 
  -4   2  -6  133.06    4.55 
  -4  -2   6  131.82    4.40 
  -4   2  -6  126.94    4.58 
  -4  -2   6  131.68    4.42 
   4  -2  -6  131.72    4.53 
  -4   2  -6  133.83    4.56 
   4  -2  -6  132.80    4.52 
  -5  -2  -6   63.79    2.25 
  -5  -2  -6   66.19    2.24 
   5  -2   6   63.94    2.26 
   5   2  -6   63.64    2.26 
  -5   2  -6   67.98    2.56 
   5  -2  -6   68.21    2.46 
  -5   2  -6   70.10    2.50 
  -5  -2   6   68.05    2.31 
  -5  -2   6   68.25    2.35 
  -6   2   6   39.17    1.62 
  -6  -2  -6   39.21    1.44 
  -6   2   6   39.79    1.55 
  -6   2   6   40.93    1.43 
  -6   2  -6   39.33    1.44 
  -6   2  -6   40.73    1.49 
  -6   2  -6   42.10    1.48 
  -6   2  -6   38.44    1.64 
  -6  -2   6   38.18    1.42 
  -6  -2   6   41.66    1.58 
  -7   2   6   12.56    0.67 
  -7   2   6   12.40    0.62 
  -7   2   6   11.75    0.60 
  -7   2   6   11.88    0.48 
  -7  -2   6   11.09    0.59 
  -7   2  -6   11.85    0.53 
  -7   2  -6   11.51    0.49 
  -8   2   6    1.51    0.21 
  -8   2   6    1.80    0.19 
  -8   2  -6    2.18    0.15 
   0  -3  -6   27.98    1.04 
   0  -3   6   27.76    0.96 
   0   3  -6   28.60    1.08 
   0  -3  -6   26.57    1.01 
   0   3   6   25.94    1.02 
   0  -3  -6   27.52    1.16 
   0  -3  -6   28.60    1.01 
  -1  -3  -6   54.58    1.98 
   1  -3   6   53.56    1.95 
   1   3  -6   54.73    1.96 
  -1  -3  -6   53.84    1.92 
  -1  -3  -6   55.43    1.98 
  -1   3   6   53.57    2.03 
  -1  -3  -6   63.41    1.92 
  -1  -3  -6   54.75    2.06 
  -1  -3  -6   56.49    1.91 
   1   3  -6   57.96    2.03 
   1   3   6   58.25    2.03 
  -1  -3   6   58.98    1.98 
  -1  -3   6   56.33    2.20 
  -1   3  -6   58.65    2.04 
  -1   3  -6   59.48    2.11 
   1  -3  -6   58.38    2.05 
  -1   3  -6   59.27    2.05 
  -2   3   6   51.81    1.78 
  -2   3   6   47.61    1.78 
  -2  -3  -6   50.73    1.81 
   2   3  -6   48.59    1.77 
  -2   3   6   49.79    1.77 
  -2  -3  -6   49.39    1.73 
  -2  -3  -6   51.20    1.71 
   2   3  -6   51.47    1.86 
   2  -3   6   50.32    1.78 
  -2   3  -6   48.12    1.79 
   2  -3  -6   48.99    1.75 
  -2   3  -6   49.48    1.70 
  -2   3  -6   46.79    1.69 
  -2  -3   6   48.17    1.65 
   2   3   6   48.35    1.70 
  -3   3   6   69.48    2.50 
  -3   3   6   69.34    2.53 
  -3  -3  -6   74.67    2.58 
  -3  -3  -6   71.65    2.46 
   3   3  -6   74.35    2.54 
   3  -3   6   76.38    2.55 
  -3   3   6   72.12    2.53 
  -3  -3  -6   76.16    2.50 
  -3  -3   6   60.17    2.08 
   3   3   6   61.59    2.12 
  -3   3  -6   63.00    2.12 
  -3  -3   6   56.87    2.08 
   3  -3  -6   64.51    2.21 
  -3  -3   6   60.85    2.08 
   4   3  -6  173.51    5.66 
   4  -3   6  170.64    5.67 
  -4   3   6  144.42    5.78 
  -4  -3  -6  173.22    5.62 
  -4   3   6  169.23    5.62 
  -4  -3  -6  172.23    5.55 
  -4   3  -6  165.71    5.70 
  -4  -3   6  159.43    5.52 
  -4  -3   6  161.81    5.50 
  -4   3  -6  164.40    5.55 
   4  -3  -6  170.09    5.67 
  -4   3  -6  163.93    5.51 
  -4   3  -6  168.71    5.70 
  -4   3  -6  162.30    5.67 
  -4   3  -6  168.99    5.66 
   5   3  -6   61.77    2.19 
  -5  -3  -6   58.34    2.17 
   5  -3   6   62.14    2.22 
  -5   3   6   61.82    2.33 
  -5  -3  -6   65.20    2.17 
   5  -3  -6   59.03    2.25 
  -5  -3   6   62.46    2.08 
  -5   3  -6   61.12    2.33 
  -5  -3   6   61.56    2.12 
  -5   3  -6   61.88    2.26 
  -6   3   6   31.06    1.11 
  -6   3   6   28.73    1.20 
  -6  -3  -6   29.51    1.12 
  -6   3   6   28.62    1.24 
  -6  -3   6   38.62    1.40 
  -6   3  -6   39.13    1.45 
  -6   3  -6   38.95    1.61 
  -6   3  -6   40.07    1.41 
  -6   3  -6   40.12    1.42 
  -7   3   6   11.25    0.61 
  -7   3   6   10.51    0.55 
  -7   3   6   10.95    0.45 
  -7   3  -6   13.28    0.54 
  -7   3  -6   13.71    0.58 
  -8   3   6   14.03    0.67 
  -8   3   6   10.42    0.50 
   0  -4  -6   62.06    2.24 
   0   4   6   67.63    2.28 
   0   4  -6   64.01    2.23 
   0  -4  -6   64.39    2.29 
   0   4   6   63.77    2.25 
   0   4  -6   65.70    2.34 
   0  -4  -6   62.63    2.24 
  -1  -4  -6   42.59    1.46 
  -1  -4  -6   42.37    1.46 
  -1  -4  -6   42.23    1.56 
  -1   4   6   41.49    1.51 
  -1  -4  -6   41.28    1.48 
   1   4  -6   42.08    1.50 
   1   4  -6   42.00    1.60 
   1   4  -6   40.37    1.52 
   1   4   6   51.08    1.85 
  -1   4  -6   51.78    1.94 
   1  -4  -6   51.65    1.87 
  -1   4  -6   55.01    1.85 
  -1   4  -6   49.53    1.86 
   2   4  -6  108.19    3.72 
  -2   4   6  108.96    3.73 
  -2  -4  -6  110.58    3.77 
  -2   4   6  108.51    3.71 
  -2  -4  -6  108.01    3.65 
  -2   4   6  106.92    3.74 
  -2  -4  -6  109.65    3.65 
   2   4  -6  107.15    3.82 
   2  -4   6  111.11    3.73 
  -2  -4  -6  103.91    3.64 
  -2  -4   6   97.63    3.31 
  -2   4  -6  100.11    3.36 
   2   4   6   98.37    3.36 
  -2  -4   6   98.21    3.30 
  -2   4  -6   93.86    3.47 
  -2   4  -6   98.96    3.36 
  -3   4   6    4.90    0.30 
  -3  -4  -6    4.96    0.27 
   3   4  -6    5.16    0.32 
   3  -4   6    5.18    0.33 
  -3   4   6    4.94    0.43 
  -3  -4  -6    5.08    0.25 
  -3  -4  -6    5.43    0.35 
  -3   4   6    5.12    0.31 
  -3   4   6    5.36    0.31 
  -3   4  -6    2.92    0.30 
  -3   4  -6    2.85    0.22 
  -3   4  -6    2.99    0.31 
  -3   4  -6    3.13    0.23 
   3  -4  -6    3.29    0.29 
   3   4   6    3.32    0.23 
  -3  -4   6    3.03    0.19 
  -3   4  -6    3.18    0.19 
  -3  -4   6    3.35    0.20 
  -4  -4  -6    7.50    0.31 
  -4  -4  -6    7.43    0.39 
  -4   4   6    7.61    0.30 
   4  -4   6    7.44    0.42 
  -4   4   6    8.31    0.52 
  -4  -4  -6    7.51    0.37 
  -4   4   6    6.98    0.54 
  -4   4   6    7.77    0.39 
   4   4  -6    7.69    0.41 
  -4  -4   6    8.02    0.34 
  -4   4  -6    8.05    0.51 
   4   4   6    7.94    0.38 
  -4   4  -6    7.78    0.37 
  -4   4  -6    7.64    0.40 
   4  -4  -6    7.18    0.48 
  -4  -4   6    7.92    0.36 
  -4   4  -6    7.71    0.52 
  -5   4   6   13.31    0.67 
  -5   4   6   14.00    0.62 
  -5  -4  -6   13.60    0.60 
  -5  -4  -6   13.64    0.58 
  -5   4   6   13.68    0.61 
  -5   4   6   13.82    0.75 
  -5   4   6   13.52    0.60 
  -5   4   6   13.33    0.60 
  -5  -4   6   11.61    0.43 
  -5   4  -6   10.78    0.58 
  -5   4  -6   11.37    0.49 
  -5  -4   6   11.21    0.48 
  -5   4  -6    9.74    0.45 
  -5   4  -6   11.08    0.52 
  -5   4  -6   10.11    0.63 
  -5   4  -6   11.23    0.51 
  -6  -4  -6   47.51    1.71 
  -6   4   6   47.50    1.70 
  -6   4   6   48.54    1.79 
  -6   4   6   46.60    1.70 
  -6   4  -6   48.36    1.71 
  -6   4  -6   49.26    1.72 
  -6   4  -6   47.94    1.74 
  -6  -4   6   48.88    1.71 
  -7   4   6    1.85    0.23 
  -7   4   6    1.74    0.15 
  -7   4   6    1.60    0.17 
  -7   4  -6    3.04    0.22 
   0  -5  -6   46.27    1.63 
   0  -5  -6   41.50    1.64 
   0   5   6   45.10    1.61 
   0   5  -6   41.87    1.71 
   0  -5  -6   43.29    1.66 
   0   5  -6   45.16    1.59 
   0  -5  -6   43.17    1.60 
  -1   5   6   79.25    2.75 
  -1  -5  -6   76.14    2.73 
  -1  -5  -6   77.91    2.80 
  -1  -5  -6   78.79    2.66 
   1   5  -6   80.73    2.74 
  -1  -5  -6   80.22    2.71 
   1   5  -6   73.71    2.76 
  -1   5  -6   70.00    2.44 
   1  -5  -6   68.29    2.50 
   1   5   6   69.15    2.49 
  -1   5  -6   71.98    2.66 
  -2  -5  -6   20.52    0.81 
  -2   5   6   21.32    0.89 
  -2  -5  -6   20.87    0.85 
  -2  -5  -6   21.84    0.81 
   2   5  -6   22.13    0.90 
  -2  -5  -6   21.61    0.94 
  -2   5   6   21.39    1.08 
   2   5  -6   22.03    0.88 
  -2   5  -6   17.72    0.76 
  -2  -5   6   18.21    0.66 
  -2   5  -6   18.54    0.76 
  -2  -5   6   17.99    0.69 
  -2  -5   6   17.66    0.70 
  -2   5  -6   16.80    0.90 
   2   5   6   18.87    0.78 
   3   5  -6  126.16    4.34 
  -3   5   6  122.74    4.57 
  -3  -5  -6  127.60    4.39 
  -3   5   6  126.55    4.33 
  -3   5   6  117.75    4.32 
   3   5  -6  122.45    4.31 
   3  -5   6  124.93    4.36 
  -3  -5  -6  125.18    4.27 
  -3  -5  -6  124.30    4.23 
  -3   5   6  137.79    4.39 
  -3   5  -6  123.21    4.17 
   3   5   6  123.22    4.24 
  -3  -5   6  124.50    4.18 
  -3  -5   6  124.03    4.17 
  -3   5  -6  124.75    4.24 
  -3   5  -6  127.84    4.45 
  -3   5  -6  117.37    4.24 
  -4   5   6    1.82    0.13 
  -4   5   6    1.44    0.34 
  -4  -5  -6    1.59    0.14 
  -4  -5  -6    1.52    0.19 
  -4   5  -6    2.54    0.37 
  -4  -5   6    2.50    0.20 
  -4  -5   6    2.50    0.18 
  -4   5  -6    2.15    0.29 
  -5   5   6   18.82    0.85 
  -5  -5  -6   20.33    0.79 
  -5   5   6   18.45    0.79 
  -5   5   6   19.76    0.79 
  -5   5   6   20.05    0.98 
  -5   5   6   18.97    0.80 
  -5   5   6   19.58    0.78 
  -5   5  -6   17.49    0.72 
  -5  -5   6   18.42    0.70 
  -5   5  -6   16.44    0.84 
  -5   5  -6   17.81    0.69 
  -5   5  -6   16.76    0.69 
  -5  -5   6   17.91    0.64 
  -5   5  -6   17.84    0.82 
  -6   5   6    4.10    0.27 
  -6   5   6    3.85    0.30 
  -6  -5  -6    4.12    0.27 
  -6   5   6    3.93    0.25 
  -6   5   6    4.35    0.27 
  -6   5   6    4.21    0.30 
  -6   5  -6    5.54    0.31 
  -6   5  -6    5.33    0.36 
  -6   5  -6    5.70    0.31 
  -6   5  -6    5.61    0.28 
  -7   5   6    4.73    0.29 
  -7   5   6    3.81    0.21 
  -7   5  -6    6.77    0.31 
   0  -6  -6   59.23    2.21 
   0  -6  -6   54.93    2.13 
   0   6  -6   59.73    2.11 
   0  -6  -6   59.86    2.21 
   0  -6  -6   58.10    2.12 
   0   6   6   58.77    2.13 
  -1  -6  -6   79.59    2.97 
  -1   6   6   80.81    2.90 
  -1  -6  -6   82.19    2.88 
  -1  -6  -6   80.56    2.76 
   1   6  -6   83.21    2.88 
  -1  -6  -6   83.17    2.85 
  -1  -6   6   76.06    2.64 
   1   6   6   77.43    2.77 
  -1   6  -6   76.44    2.70 
  -1  -6   6   77.33    2.65 
  -2  -6  -6   12.64    0.56 
   2   6  -6   12.90    0.65 
   2   6  -6   13.56    0.61 
  -2   6   6   13.33    0.63 
  -2  -6  -6   12.43    0.58 
  -2  -6  -6   12.40    0.68 
  -2  -6   6   11.77    0.49 
  -2   6  -6   11.46    0.57 
  -2   6  -6   11.17    0.74 
   2   6   6   10.96    0.57 
   3   6  -6   32.45    1.21 
  -3   6   6   27.50    1.22 
  -3   6   6   33.65    1.50 
  -3  -6  -6   32.93    1.13 
  -3  -6  -6   30.18    1.14 
   3  -6   6   25.86    1.76 
  -3   6   6   30.02    1.18 
  -3   6   6   32.95    1.23 
  -3  -6   6   32.59    1.21 
  -3  -6   6   33.39    1.18 
  -3   6  -6   32.05    1.17 
  -3  -6   6   35.52    1.26 
  -3   6  -6   32.64    1.32 
  -3   6  -6   31.19    1.38 
  -3   6  -6   31.68    1.26 
  -3  -6   6   32.87    1.18 
   3  -6  -6   27.49    1.63 
  -3   6  -6   32.25    1.46 
  -3   6  -6   32.45    1.64 
  -4   6   6   44.35    1.60 
  -4  -6  -6   42.59    1.56 
  -4   6   6   43.52    1.70 
  -4  -6  -6   44.59    1.59 
  -4  -6  -6   43.91    1.52 
  -4   6   6   43.98    1.88 
  -4   6  -6   37.73    1.35 
  -4  -6   6   38.95    1.37 
  -4   6  -6   38.03    1.49 
  -4   6  -6   36.87    1.59 
   4  -6  -6   37.63    1.83 
  -4   6  -6   36.23    1.46 
  -4   6  -6   37.63    1.42 
  -4  -6   6   39.85    1.35 
  -5   6   6   65.00    2.23 
  -5   6   6   64.00    2.25 
  -5   6   6   66.23    2.24 
  -5   6   6   60.53    2.28 
  -5  -6  -6   64.36    2.23 
  -5   6   6   62.44    2.31 
   5  -6  -6   60.72    2.55 
  -5   6  -6   58.18    2.05 
  -5   6  -6   58.71    2.17 
  -5   6  -6   61.02    2.24 
  -5   6  -6   57.97    2.09 
  -5   6  -6   59.84    2.06 
  -6   6   6    6.91    0.32 
  -6   6   6    6.90    0.33 
  -6   6   6    6.37    0.33 
  -6   6   6    6.87    0.38 
  -6   6  -6    6.35    0.34 
  -6   6  -6    7.11    0.39 
   6  -6  -6    6.79    0.59 
   0  -7  -6    4.82    0.61 
   0  -7  -6    5.07    0.44 
   0   7   6    5.18    0.61 
   0  -7  -6    5.19    0.35 
   0   7  -6    5.17    0.53 
   0  -7   6    5.58    0.49 
   0  -7   6    5.33    0.35 
   0  -7  -6    5.27    0.40 
   0  -7  -6    5.27    0.32 
   0  -7   6    5.12    0.46 
   0   7   6    5.55    0.37 
   0  -7   6    4.64    0.34 
   0   7  -6    5.39    0.35 
   0  -7  -6    4.93    0.38 
  -1  -7  -6    5.94    0.38 
  -1  -7  -6    7.14    0.46 
  -1  -7  -6    5.89    0.45 
   1  -7   6    6.29    0.49 
  -1   7   6    6.16    0.56 
  -1  -7  -6    5.74    0.41 
   1   7  -6    6.03    0.38 
  -1   7   6    6.28    0.41 
   1   7  -6    6.36    0.64 
  -1  -7  -6    6.03    0.40 
  -1  -7   6    4.58    0.29 
  -1  -7   6    5.11    0.34 
  -1  -7   6    4.17    0.32 
   1  -7  -6    4.38    0.36 
   1  -7  -6    4.59    0.33 
   1  -7  -6    4.37    0.41 
  -1  -7   6    5.01    0.55 
  -1  -7   6    4.66    0.41 
  -1  -7   6    4.54    0.28 
  -1   7  -6    4.40    0.37 
  -1  -7   6    4.64    0.28 
   2   7  -6   44.82    1.62 
  -2  -7  -6   41.93    1.63 
  -2  -7  -6   42.02    1.63 
  -2   7   6   42.55    1.80 
  -2  -7  -6   42.30    1.56 
  -2  -7  -6   40.45    1.59 
  -2  -7  -6   43.61    1.59 
  -2   7   6   43.28    1.63 
  -2  -7  -6   45.92    1.59 
   2  -7   6   42.92    1.88 
  -2  -7  -6   42.10    1.56 
  -2  -7   6   50.88    1.88 
  -2  -7   6   49.77    1.93 
  -2   7  -6   50.29    2.10 
  -2  -7   6   50.39    1.85 
   2  -7  -6   52.23    1.98 
  -2  -7   6   53.11    1.79 
  -2  -7   6   50.35    1.84 
  -2   7  -6   48.52    1.95 
  -3  -7  -6    5.91    0.35 
  -3   7   6    5.90    0.58 
   3  -7   6    6.49    0.70 
  -3   7   6    5.66    0.44 
  -3  -7  -6    5.42    0.31 
  -3   7   6    6.26    0.65 
  -3   7   6    5.67    0.34 
  -3   7   6    6.35    0.36 
  -3  -7   6    4.63    0.27 
  -3   7  -6    4.91    0.37 
   3  -7  -6    3.81    0.46 
  -3  -7   6    4.04    0.31 
  -3  -7   6    3.74    0.27 
  -3   7  -6    4.91    0.52 
  -3  -7   6    3.83    0.28 
  -3   7  -6    4.91    0.49 
  -3   7  -6    4.42    0.23 
  -3  -7   6    4.11    0.26 
  -3   7  -6    4.21    0.38 
  -4   7   6   47.22    1.79 
  -4   7   6   46.33    1.68 
  -4   7   6   49.60    1.79 
  -4   7   6   44.38    1.91 
  -4   7   6   49.13    1.70 
  -4   7  -6   39.99    1.57 
  -4   7  -6   40.77    1.46 
  -4   7  -6   42.06    1.58 
  -4   7  -6   39.90    1.52 
  -4   7  -6   43.57    1.74 
   4  -7  -6   43.91    1.81 
  -5   7   6    7.21    0.35 
  -5   7   6    7.56    0.36 
  -5   7   6    7.42    0.34 
  -5   7   6    7.79    0.42 
  -5   7   6    7.42    0.40 
   5  -7   6    6.27    0.60 
  -5   7  -6    6.57    0.38 
  -5   7  -6    6.97    0.35 
   5  -7  -6    6.55    0.54 
  -5   7  -6    6.73    0.32 
   0  -8   6    1.99    0.35 
   0  -8  -6    2.02    0.31 
   0  -8   6    2.03    0.18 
   0  -8   6    1.77    0.44 
   0  -8   6    1.61    0.24 
   0   8   6    2.11    0.38 
   0  -8   6    1.75    0.25 
   0  -8   6    1.75    0.21 
   0   8  -6    1.97    0.33 
   0  -8   6    2.07    0.26 
   0  -8  -6    1.83    0.26 
   0  -8  -6    2.09    0.29 
   0  -8  -6    2.19    0.25 
  -1  -8  -6   11.26    0.58 
  -1  -8  -6   11.85    0.55 
   1  -8   6   11.49    0.67 
   1   8  -6   10.91    0.77 
   1  -8   6   11.53    0.66 
  -1  -8  -6   12.37    0.62 
  -1  -8  -6   11.56    0.58 
  -1  -8  -6   11.05    0.53 
   1  -8  -6   11.81    0.65 
   1   8   6   11.62    0.83 
   1  -8  -6   12.34    0.90 
  -1  -8   6   11.19    0.56 
   1  -8  -6   10.88    0.58 
   1  -8  -6   11.79    0.62 
  -1  -8   6   11.39    0.65 
  -1  -8   6   11.23    0.49 
   1  -8  -6   11.20    0.54 
   1  -8  -6   11.12    0.51 
  -1  -8   6   11.45    0.56 
  -2  -8  -6   16.77    0.74 
  -2  -8  -6   16.92    0.70 
  -2  -8  -6   16.71    0.70 
  -2  -8  -6   17.06    0.86 
   2   8  -6   16.61    0.98 
  -2  -8  -6   15.72    0.65 
  -2   8  -6   13.44    0.56 
  -2   8  -6   13.43    0.99 
  -2   8  -6   12.95    0.67 
  -2  -8   6   14.14    0.61 
  -2  -8   6   12.91    0.60 
  -2  -8   6   13.21    0.65 
  -2  -8   6   13.09    0.59 
  -3   8   6   21.07    0.87 
  -3   8   6   18.21    0.74 
  -3   8   6   18.61    0.79 
  -3   8   6   18.37    1.08 
  -3   8   6   18.31    0.72 
  -3  -8   6   18.09    0.77 
  -3  -8   6   19.95    0.72 
  -3   8  -6   19.13    0.85 
  -4   8   6    2.04    0.22 
  -4   8   6    1.98    0.20 
  -4   8   6    2.47    0.25 
  -4   8   6    2.02    0.18 
   4  -8   6    1.95    0.33 
   4  -8   6    2.54    0.29 
  -4   8  -6    3.08    0.25 
  -4   8  -6    2.71    0.21 
  -4   8  -6    2.80    0.26 
   0  -9  -6   21.82    0.89 
   0  -9  -6   21.87    0.82 
   0  -9  -6   23.02    0.85 
   0  -9   6   20.09    0.84 
   0  -9   6   21.37    0.90 
   0  -9  -6   17.47    0.83 
  -1  -9  -6   22.53    0.89 
  -1  -9  -6   23.28    0.84 
  -1  -9  -6   23.33    0.89 
  -1  -9  -6   23.44    0.86 
   1  -9   6   19.28    0.93 
   1  -9  -6   18.89    0.80 
  -1  -9   6   20.51    0.79 
   1  -9  -6   19.48    0.76 
   1   9   6   19.79    0.98 
   1  -9  -6   20.12    0.84 
  -1  -9   6   19.89    0.84 
  -1  -9   6   18.61    0.78 
  -2  -9  -6    9.74    0.51 
   2  -9   6   11.30    0.56 
  -2  -9  -6   11.86    0.49 
  -2   9   6   11.87    0.77 
   2   9  -6   12.95    0.69 
   2  -9  -6   10.31    0.53 
   2   9   6   10.40    0.67 
  -2  -9   6   10.74    0.47 
  -2  -9   6   11.32    0.44 
  -2  -9   6   10.76    0.50 
  -2   9  -6   11.41    0.54 
   0   0  -7    0.11    0.06 
   0   0  -7    0.16    0.11 
   0   0  -7    0.04    0.09 
   0   0  -7    0.04    0.07 
   0   0  -7    0.02    0.06 
   0   0  -7    0.05    0.06 
   1   0   7  611.12   20.17 
  -1   0   7  585.90   20.18 
  -1   0  -7  610.79   20.20 
  -1   0  -7  617.85   20.19 
  -1   0   7  619.15   20.12 
  -1   0   7  603.82   20.15 
   1   0  -7  619.33   20.17 
  -1   0  -7  608.43   20.15 
  -1   0   7  563.76   20.30 
  -1   0  -7  655.25   20.19 
  -1   0  -7  618.37   20.35 
  -1   0   7  603.74   20.32 
  -1   0  -7  613.00   20.33 
   2   0   7   33.49    1.23 
  -2   0  -7   34.87    1.29 
  -2   0  -7   35.20    1.32 
  -2   0   7   34.96    1.38 
  -2   0  -7   35.59    1.22 
   2   0  -7   35.83    1.27 
   2   0   7   35.52    1.38 
  -2   0   7   37.15    1.24 
  -2   0   7   35.29    1.21 
  -2   0   7   35.74    1.24 
  -2   0  -7   35.25    1.31 
   3   0  -7    6.72    0.34 
  -3   0  -7    6.46    0.35 
  -3   0   7    6.77    0.28 
   3   0   7    6.87    0.29 
  -3   0  -7    6.89    0.39 
  -3   0   7    6.64    0.29 
  -3   0  -7    6.68    0.29 
  -3   0   7    6.25    0.30 
   4   0  -7   23.96    0.91 
   4   0   7   23.46    0.85 
  -4   0  -7   22.89    0.98 
  -4   0  -7   22.80    0.97 
  -4   0  -7   23.07    0.86 
  -5   0   7  154.13    5.12 
   5   0  -7  154.70    5.22 
  -5   0  -7  150.04    5.16 
  -5   0  -7  154.46    5.31 
  -6   0  -7   23.44    0.95 
  -6   0  -7   24.23    1.03 
  -6   0  -7   23.21    0.91 
  -6   0   7   23.60    1.08 
  -6   0   7   23.70    1.03 
  -6   0   7   24.40    0.85 
  -7   0  -7    2.05    0.20 
  -7   0   7    1.66    0.27 
  -7   0   7    1.80    0.28 
  -8   0   7    2.30    0.25 
   0  -1  -7  257.86    8.36 
   0  -1   7  246.85    8.36 
   0   1   7  236.70    8.35 
   0   1  -7  242.67    8.37 
   0   1  -7  259.47    8.40 
   0  -1  -7  254.47    8.36 
   0   1  -7  236.11    8.37 
   0  -1   7  256.00    8.32 
   0  -1  -7  254.26    8.49 
   0  -1  -7  250.03    8.37 
   0   1  -7  258.10    8.52 
   0   1  -7  254.07    8.38 
   0   1  -7  256.39    8.36 
   0  -1  -7  257.24    8.49 
  -1  -1  -7   89.27    3.12 
   1   1  -7   92.16    3.09 
  -1  -1  -7   93.98    3.06 
  -1  -1  -7   90.13    3.10 
  -1  -1  -7   90.05    3.16 
  -1  -1  -7   92.48    3.05 
  -1   1   7   88.10    3.22 
  -1   1   7   90.23    3.07 
  -1  -1  -7   94.08    3.19 
   1  -1   7   86.29    3.06 
  -1   1   7   92.40    3.09 
  -1   1  -7  101.96    3.35 
  -1   1  -7  100.56    3.48 
  -1   1  -7   98.41    3.37 
  -1  -1   7  103.18    3.34 
  -1  -1   7   99.98    3.34 
  -1   1  -7   96.92    3.47 
  -1   1  -7   98.33    3.37 
  -1  -1   7   98.04    3.30 
   1   1   7   95.87    3.33 
  -1  -1   7  101.58    3.49 
  -1   1  -7   99.81    3.37 
  -1  -1   7   97.09    3.50 
   1  -1  -7   97.77    3.36 
  -1   1  -7   96.92    3.33 
  -2   1   7   89.55    3.25 
  -2  -1  -7   89.49    3.08 
  -2  -1  -7   91.07    3.14 
   2   1  -7   93.08    3.13 
  -2   1   7   93.63    3.10 
   2  -1   7   93.87    3.10 
  -2  -1  -7   85.52    3.12 
  -2  -1  -7   91.65    3.17 
  -2   1   7   95.40    3.11 
  -2  -1  -7   93.50    3.07 
  -2  -1   7   84.09    2.86 
   2   1   7   84.55    3.00 
  -2   1  -7   84.39    2.93 
  -2  -1   7   85.02    3.03 
  -2  -1   7   87.74    2.88 
  -2   1  -7   84.45    2.85 
  -2  -1   7   82.14    3.04 
  -2   1  -7   84.20    2.96 
  -2   1  -7   87.36    2.89 
   2   1   7   87.83    2.88 
   2  -1  -7   84.45    2.92 
  -2   1  -7   86.63    2.99 
  -2   1  -7   86.19    3.03 
  -3   1   7   81.34    2.78 
   3   1  -7   82.50    2.84 
  -3   1   7   83.96    2.81 
   3  -1   7   82.85    2.81 
  -3  -1  -7   82.29    2.87 
  -3  -1  -7   81.80    2.91 
  -3   1   7   83.38    2.77 
  -3   1   7   82.19    2.82 
  -3  -1  -7   82.73    2.80 
   3  -1  -7   77.33    2.61 
  -3   1  -7   77.40    2.66 
  -3  -1   7   73.98    2.53 
  -3   1  -7   72.50    2.52 
   3   1   7   73.57    2.54 
  -4  -1  -7    8.97    0.40 
  -4  -1  -7   10.54    0.57 
  -4  -1  -7    9.33    0.51 
  -4   1   7    8.75    0.42 
  -4   1   7    7.75    0.51 
   4  -1   7    9.57    0.41 
  -4   1   7    9.64    0.39 
   4   1  -7    9.95    0.45 
  -4  -1   7    9.47    0.37 
  -4   1  -7    9.03    0.50 
   4   1   7    8.60    0.39 
  -4   1  -7    8.96    0.48 
   4  -1  -7    8.85    0.44 
  -5  -1  -7   43.54    1.67 
   5   1  -7   41.97    1.58 
   5  -1   7   42.99    1.55 
  -5  -1  -7   45.55    1.56 
   5  -1  -7   42.56    1.60 
  -5  -1   7   42.91    1.48 
  -5   1  -7   43.49    1.67 
  -6  -1  -7    0.76    0.17 
  -6   1   7    0.42    0.19 
  -6  -1  -7    0.55    0.19 
  -6   1   7    0.44    0.10 
  -6   1   7    0.78    0.14 
  -6   1   7    0.56    0.21 
  -6  -1   7    1.23    0.26 
  -6   1  -7    1.52    0.21 
  -6   1  -7    2.23    0.26 
  -6   1  -7    1.47    0.19 
  -6  -1   7    1.49    0.11 
  -7   1   7   29.37    1.03 
  -7   1   7   28.77    1.17 
  -7  -1  -7   29.62    1.08 
  -7   1   7   29.02    1.16 
  -7   1   7   29.20    1.24 
  -7   1  -7   23.59    0.94 
  -7   1  -7   23.71    0.90 
  -7  -1   7   24.86    1.02 
  -8   1   7   12.53    0.58 
   0   2  -7   64.23    2.31 
   0  -2  -7   70.02    2.31 
   0  -2  -7   63.41    2.44 
   0   2  -7   68.07    2.36 
   0   2   7   65.37    2.30 
   0  -2   7   66.23    2.30 
   0  -2  -7   69.51    2.30 
   0  -2  -7   67.50    2.32 
   0  -2   7   68.40    2.25 
  -1   2   7  228.27    7.48 
  -1  -2  -7  220.08    7.49 
  -1  -2  -7  236.43    7.43 
   1   2  -7  218.60    7.47 
  -1  -2  -7  226.78    7.51 
  -1  -2  -7  231.78    7.44 
   1   2  -7  215.06    7.52 
  -1   2   7  217.81    7.46 
  -1  -2  -7  223.46    7.57 
   1  -2   7  216.67    7.46 
  -1  -2  -7  224.65    7.43 
  -1   2  -7  222.82    7.59 
  -1   2  -7  237.68    7.59 
   1   2   7  228.41    7.58 
  -1  -2   7  223.64    7.75 
  -1   2  -7  228.19    7.64 
  -1   2  -7  227.19    7.76 
  -1  -2   7  224.31    7.54 
  -2  -2  -7   25.36    0.97 
  -2  -2  -7   24.82    0.99 
  -2   2   7   25.58    0.94 
   2   2  -7   25.27    0.95 
  -2   2   7   24.62    0.93 
  -2  -2  -7   24.73    0.91 
  -2   2   7   25.61    1.10 
  -2   2   7   25.61    0.95 
   2  -2   7   25.83    0.94 
  -2  -2  -7   25.45    0.89 
  -2   2  -7   28.43    1.03 
   2  -2  -7   28.75    1.08 
  -2  -2   7   27.91    0.99 
  -2   2  -7   28.80    1.10 
  -2   2  -7   27.94    1.09 
  -2   2  -7   29.49    1.02 
   2   2   7   28.46    1.03 
  -3   2   7   11.07    0.47 
   3  -2   7   10.89    0.47 
  -3  -2  -7   10.46    0.45 
  -3   2   7   11.17    0.45 
  -3  -2  -7   11.22    0.55 
   3   2  -7   10.98    0.48 
  -3   2   7   11.11    0.47 
  -3  -2  -7   10.19    0.50 
   3  -2  -7    7.87    0.42 
  -3   2  -7    8.69    0.36 
  -3   2  -7    8.47    0.45 
   3   2   7    8.61    0.36 
  -3  -2   7    8.07    0.34 
  -4  -2  -7    3.94    0.35 
   4   2  -7    4.47    0.27 
  -4   2   7    4.32    0.26 
  -4   2   7    4.06    0.36 
  -4  -2  -7    3.87    0.24 
  -4   2   7    3.79    0.23 
   4  -2   7    4.08    0.26 
  -4   2  -7    3.71    0.30 
  -4  -2   7    4.07    0.20 
   4  -2  -7    4.02    0.29 
  -4   2  -7    3.77    0.30 
  -4  -2   7    3.93    0.21 
   5   2  -7    1.04    0.16 
  -5  -2  -7    1.39    0.17 
  -5  -2  -7    1.24    0.17 
   5  -2   7    1.44    0.16 
   5  -2  -7    1.91    0.23 
  -5  -2   7    1.85    0.14 
  -5   2  -7    1.76    0.24 
  -5  -2   7    1.66    0.15 
  -6   2   7   19.30    0.80 
  -6  -2  -7   21.38    0.82 
  -6   2   7   21.69    0.93 
  -6   2   7   21.12    0.99 
  -6  -2   7   20.94    0.92 
  -6   2  -7   19.46    0.83 
  -6   2  -7   20.57    0.77 
  -6   2  -7   20.44    0.80 
  -7   2   7   22.63    0.97 
  -7   2   7   23.37    0.97 
  -7   2   7   23.38    0.86 
  -7   2   7   24.93    1.06 
  -7   2  -7   26.61    0.99 
  -7   2  -7   25.97    1.03 
  -7  -2   7   28.18    1.11 
  -8   2   7    8.34    0.40 
  -8   2   7    8.82    0.45 
  -8   2  -7    7.74    0.32 
   0   3  -7  375.73   12.48 
   0  -3  -7  360.90   12.58 
   0  -3  -7  367.76   12.39 
   0  -3  -7  380.36   12.41 
   0  -3  -7  378.10   12.44 
   0   3   7  366.86   12.41 
   0  -3   7  383.58   12.34 
   1  -3   7   27.50    1.04 
  -1  -3  -7   28.53    0.99 
  -1  -3  -7   27.38    0.99 
  -1  -3  -7   27.92    1.01 
   1   3  -7   28.35    1.11 
  -1  -3  -7   28.60    1.08 
  -1  -3  -7   27.27    1.07 
   1   3  -7   28.19    1.05 
  -1   3   7   26.94    1.03 
  -1  -3   7   22.15    0.78 
  -1   3  -7   21.37    0.84 
  -1   3  -7   22.37    0.84 
  -1   3  -7   21.67    0.90 
   1   3   7   21.99    0.84 
   2   3  -7   45.48    1.74 
  -2  -3  -7   50.56    1.80 
  -2   3   7   44.94    1.67 
   2  -3   7   46.53    1.66 
  -2  -3  -7   47.23    1.60 
  -2   3   7   45.66    1.66 
  -2  -3  -7   46.00    1.70 
   2   3  -7   46.79    1.67 
  -2   3   7   45.46    1.66 
  -2  -3  -7   45.79    1.61 
  -2   3  -7   59.41    2.05 
   2  -3  -7   56.93    2.09 
  -2   3  -7   59.50    2.14 
  -2  -3   7   57.56    1.99 
   2   3   7   61.00    2.04 
   2  -3  -7   57.03    2.10 
  -2   3  -7   58.23    2.03 
  -3   3   7   36.85    1.32 
  -3   3   7   35.50    1.33 
   3   3  -7   36.03    1.45 
   3  -3   7   35.86    1.35 
  -3   3   7   36.57    1.34 
  -3  -3  -7   35.40    1.30 
   3   3  -7   35.48    1.35 
  -3   3   7   39.02    1.53 
  -3  -3  -7   37.33    1.39 
  -3  -3  -7   36.87    1.27 
  -3   3  -7   43.00    1.51 
  -3  -3   7   42.53    1.47 
   3  -3  -7   41.57    1.59 
  -3   3  -7   42.06    1.45 
  -3   3  -7   45.34    1.57 
  -3  -3   7   41.61    1.47 
  -3  -3   7   40.83    1.48 
   3  -3  -7   42.31    1.61 
   3   3   7   43.20    1.51 
   4   3  -7   27.00    1.04 
  -4   3   7   25.30    1.16 
  -4   3   7   26.40    1.03 
  -4  -3  -7   27.07    0.93 
   4  -3   7   27.43    1.04 
  -4   3   7   26.70    1.00 
  -4  -3  -7   26.53    1.00 
  -4   3  -7   30.99    1.05 
  -4   3  -7   27.80    1.06 
   4  -3  -7   28.48    1.16 
   4   3   7   29.18    1.05 
  -4   3  -7   27.35    1.18 
  -4  -3   7   28.05    1.02 
  -4   3  -7   28.17    1.16 
  -4  -3   7   28.33    1.04 
  -5  -3  -7   49.82    1.74 
  -5  -3  -7   46.97    1.72 
  -5   3   7   48.38    1.90 
   5  -3  -7   41.09    1.62 
  -5  -3   7   41.76    1.47 
  -5   3  -7   39.40    1.50 
  -5  -3   7   42.29    1.44 
  -5   3  -7   42.50    1.60 
  -6   3   7   24.01    1.05 
  -6  -3  -7   23.16    0.92 
  -6   3   7   23.49    0.91 
  -6   3   7   23.89    1.01 
  -6   3  -7   23.47    0.88 
  -6   3  -7   22.78    0.87 
  -6   3  -7   23.36    0.92 
  -6  -3   7   23.09    0.87 
  -7   3   7    5.37    0.27 
  -7   3   7    5.05    0.35 
  -7   3   7    5.69    0.41 
  -7   3  -7    5.18    0.31 
  -7   3  -7    5.69    0.29 
   0   4  -7   72.12    2.51 
   0  -4  -7   72.32    2.53 
   0   4  -7   72.94    2.62 
   0  -4  -7   73.42    2.58 
   0   4   7   71.66    2.53 
   0  -4  -7   72.50    2.52 
   0   4   7   73.13    2.55 
   1   4  -7   12.71    0.54 
   1   4  -7   13.45    0.57 
  -1  -4  -7   12.41    0.51 
   1   4  -7   12.60    0.63 
  -1   4   7   12.16    0.55 
  -1  -4  -7   13.25    0.61 
  -1  -4  -7   13.25    0.53 
  -1  -4  -7   11.98    0.50 
  -1  -4   7   14.25    0.54 
   1   4   7   13.77    0.61 
   1  -4  -7   17.29    0.74 
  -1   4  -7   13.71    0.65 
  -1   4  -7   13.87    0.62 
  -1   4  -7   13.37    0.68 
  -2  -4  -7   98.75    3.47 
  -2   4   7  100.41    3.57 
   2   4  -7  101.54    3.66 
  -2  -4  -7   92.63    3.54 
  -2  -4  -7  101.77    3.48 
  -2   4   7  106.99    3.56 
  -2  -4  -7  105.58    3.61 
  -2  -4  -7  107.14    3.49 
   2  -4   7  103.65    3.56 
   2   4  -7  108.46    3.56 
  -2   4   7  104.20    3.55 
  -2  -4   7  100.80    3.46 
  -2   4  -7  103.35    3.52 
  -2   4  -7  100.87    3.64 
  -2  -4   7   98.06    3.46 
  -2   4  -7  101.35    3.51 
  -2  -4   7  104.48    3.47 
  -2   4  -7  101.42    3.51 
  -2  -4   7  105.03    3.45 
   2   4   7  105.98    3.53 
  -3  -4  -7   33.96    1.33 
  -3  -4  -7   35.10    1.23 
   3   4  -7   33.98    1.30 
  -3   4   7   34.21    1.48 
  -3   4   7   32.10    1.26 
  -3   4   7   34.12    1.28 
  -3  -4  -7   35.38    1.20 
  -3   4   7   33.10    1.28 
   3  -4   7   33.65    1.30 
  -3   4  -7   36.16    1.47 
   3  -4  -7   36.20    1.72 
  -3   4  -7   35.34    1.25 
  -3  -4   7   35.20    1.27 
   3   4   7   35.98    1.32 
  -3   4  -7   36.13    1.33 
  -3  -4   7   35.42    1.27 
  -3   4  -7   35.93    1.31 
   4   4  -7  102.20    3.60 
  -4   4   7  106.94    3.81 
  -4  -4  -7  103.46    3.54 
  -4  -4  -7  105.78    3.48 
  -4   4   7  102.32    3.59 
   4  -4   7  101.65    3.62 
  -4  -4  -7  103.25    3.56 
  -4   4   7  103.66    3.46 
  -4   4  -7  108.78    3.91 
  -4  -4   7  113.01    3.69 
  -4   4  -7  111.03    3.75 
  -4  -4   7  107.28    3.70 
   4   4   7  110.46    3.73 
  -4   4  -7  100.58    3.77 
   4  -4  -7  113.99    3.88 
  -5   4   7   61.94    2.24 
  -5  -4  -7   62.88    2.22 
  -5   4   7   63.18    2.25 
  -5   4   7   65.39    2.44 
  -5   4   7   63.18    2.26 
  -5   4   7   62.69    2.25 
  -5   4   7   63.63    2.32 
  -5  -4  -7   65.43    2.25 
  -5   4  -7   55.00    1.94 
  -5   4  -7   56.85    1.98 
  -5  -4   7   57.23    1.93 
  -5   4  -7   56.82    2.00 
  -5   4  -7   55.65    2.10 
  -5  -4   7   56.62    1.97 
  -6  -4  -7  149.89    5.08 
  -6   4   7  146.89    5.15 
  -6   4   7  154.34    5.08 
  -6   4   7  149.34    5.07 
  -6   4  -7  142.80    4.70 
  -6   4  -7  137.02    4.71 
  -6   4  -7  139.68    4.84 
  -6  -4   7  135.74    4.68 
  -6   4  -7  139.22    4.68 
  -7   4   7   27.91    1.11 
  -7   4   7   30.75    1.05 
  -7   4  -7   26.40    0.95 
  -7   4  -7   25.31    0.92 
   0   5  -7   34.15    1.27 
   0  -5  -7   33.37    1.28 
   0   5   7   34.27    1.29 
   0  -5  -7   33.64    1.30 
   0  -5  -7   33.79    1.35 
  -1  -5  -7   23.01    0.88 
   1   5  -7   22.36    0.90 
  -1   5   7   23.10    0.92 
  -1  -5  -7   21.68    0.83 
  -1  -5  -7   22.12    0.90 
  -1  -5  -7   22.69    0.97 
  -1   5  -7   26.11    1.18 
   1   5   7   25.40    1.04 
  -2   5   7    6.34    0.37 
  -2   5   7    5.13    0.49 
  -2  -5  -7    5.64    0.29 
   2   5  -7    5.31    0.35 
  -2  -5  -7    5.56    0.32 
   2   5  -7    5.91    0.34 
  -2  -5  -7    5.85    0.40 
  -2  -5  -7    5.55    0.30 
  -2   5  -7    5.51    0.45 
  -2   5  -7    5.39    0.34 
   2   5   7    5.91    0.36 
  -2  -5   7    5.74    0.29 
  -2   5  -7    5.43    0.34 
  -2  -5   7    5.75    0.27 
  -3  -5  -7   19.04    0.71 
  -3   5   7   18.03    0.79 
  -3   5   7   18.35    0.79 
   3   5  -7   18.56    0.78 
  -3  -5  -7   18.07    0.74 
  -3   5   7   16.11    0.96 
  -3  -5  -7   17.70    0.85 
   3  -5   7   19.30    0.83 
   3   5  -7   19.01    0.81 
  -3   5  -7   16.47    0.65 
  -3  -5   7   16.79    0.66 
  -3  -5   7   17.22    0.66 
  -3   5  -7   15.48    0.72 
   3   5   7   17.19    0.72 
  -3   5  -7   16.79    0.88 
  -4   5   7    4.80    0.32 
  -4   5   7    6.84    0.55 
  -4  -5  -7    4.93    0.31 
  -4  -5  -7    5.29    0.32 
   4   5  -7    4.92    0.34 
  -4  -5  -7    5.76    0.26 
  -4   5   7    5.56    0.24 
  -4   5   7    5.12    0.33 
  -4   5   7    5.21    0.34 
  -4   5  -7    7.63    0.41 
  -4   5  -7    7.56    0.48 
  -4   5  -7    7.35    0.55 
  -4   5  -7    7.15    0.48 
  -4  -5   7    7.57    0.37 
  -4  -5   7    7.39    0.34 
  -4   5  -7    7.13    0.41 
  -4   5  -7    7.46    0.37 
  -4  -5   7    7.54    0.35 
  -5   5   7   13.21    0.63 
  -5   5   7   14.80    0.81 
  -5   5   7   14.98    0.62 
  -5   5   7   14.13    0.62 
  -5   5   7   14.29    0.64 
  -5  -5  -7   15.15    0.63 
  -5   5   7   14.85    0.70 
  -5  -5   7   16.86    0.64 
  -5   5  -7   18.27    0.69 
  -5   5  -7   17.06    0.68 
  -5   5  -7   17.82    0.73 
  -5   5  -7   17.55    0.81 
  -5  -5   7   17.80    0.70 
  -6   5   7    1.42    0.23 
  -6   5   7    1.41    0.17 
  -6  -5  -7    1.07    0.18 
  -6   5   7    1.27    0.18 
  -6   5   7    1.50    0.20 
  -6   5   7    1.54    0.18 
  -6   5  -7    0.49    0.13 
  -6   5  -7    0.69    0.16 
  -6   5  -7    0.71    0.21 
  -7   5   7   31.85    1.21 
  -7   5   7   38.25    1.31 
   0  -6  -7   29.21    1.27 
   0   6  -7   31.30    1.18 
   0  -6  -7   29.41    1.14 
   0  -6  -7   29.71    1.19 
   0   6   7   30.12    1.20 
   0  -6  -7   31.38    1.22 
   1   6  -7   52.60    1.92 
  -1  -6  -7   50.79    2.02 
  -1  -6  -7   53.42    1.80 
  -1   6   7   52.88    1.95 
  -1  -6  -7   53.42    1.94 
  -1  -6   7   48.32    1.72 
   1   6   7   47.92    1.84 
  -1  -6   7   48.72    1.71 
   2   6  -7   21.93    0.90 
   2   6  -7   20.95    0.93 
  -2  -6  -7   20.68    0.98 
  -2   6   7   20.67    0.90 
  -2  -6  -7   21.37    0.84 
  -2  -6  -7   22.10    0.89 
   2   6   7   16.26    0.85 
  -2   6  -7   19.61    0.85 
  -2  -6   7   20.93    0.77 
  -2   6  -7   21.50    1.05 
  -3  -6  -7    7.20    0.35 
  -3   6   7    6.97    0.41 
  -3  -6  -7    6.56    0.31 
  -3  -6  -7    7.01    0.36 
  -3  -6  -7    6.70    0.37 
  -3   6   7    6.99    0.40 
   3  -6   7    6.73    0.72 
   3   6  -7    6.85    0.40 
  -3   6   7    6.83    0.41 
  -3   6   7    7.11    0.61 
  -3  -6   7   10.27    0.46 
  -3  -6   7    9.38    0.54 
  -3  -6   7   10.97    0.47 
  -3  -6   7   10.45    0.48 
  -3   6  -7   10.61    0.44 
  -3   6  -7   10.22    0.57 
  -3   6  -7    9.88    0.71 
  -3  -6   7   10.39    0.52 
  -3   6  -7   10.50    0.69 
  -3   6  -7    9.27    0.52 
  -3  -6   7   10.47    0.50 
  -3   6  -7    9.24    0.56 
   3  -6  -7   10.13    0.80 
  -4  -6  -7    1.06    0.12 
  -4  -6  -7    1.07    0.16 
  -4   6   7    0.95    0.26 
  -4  -6  -7    1.18    0.17 
  -4   6   7    1.33    0.20 
  -4   6   7    1.09    0.36 
  -4  -6   7    2.23    0.18 
  -4  -6   7    1.99    0.20 
   4  -6  -7    1.97    0.47 
  -4   6  -7    2.04    0.23 
  -4   6  -7    1.91    0.18 
  -4   6  -7    2.16    0.27 
  -4   6  -7    2.13    0.26 
  -4   6  -7    1.99    0.34 
  -5  -6  -7    0.38    0.16 
  -5   6   7    0.53    0.19 
  -5   6   7    0.40    0.29 
  -5   6   7    0.48    0.15 
  -5   6   7    0.29    0.14 
  -5   6   7    0.49    0.20 
  -5   6   7    0.54    0.17 
  -5   6  -7    0.64    0.14 
  -5   6  -7    0.63    0.31 
  -5   6  -7    0.52    0.20 
  -5   6  -7    0.53    0.18 
  -5   6  -7    0.56    0.14 
   5  -6  -7    0.30    0.26 
  -6   6   7    1.26    0.15 
  -6   6   7    1.31    0.15 
  -6   6   7    1.15    0.19 
  -6   6   7    1.55    0.16 
   6  -6  -7    1.20    0.34 
  -6   6  -7    1.39    0.15 
  -6   6  -7    1.01    0.14 
  -6   6  -7    1.20    0.19 
   0   7  -7   64.71    2.70 
   0  -7  -7   69.40    2.51 
   0  -7  -7   65.28    2.45 
   0  -7  -7   69.45    2.40 
   0  -7   7   67.40    2.58 
   0   7  -7   70.16    2.47 
   0  -7  -7   65.01    2.83 
   0  -7   7   70.54    2.48 
   0   7   7   71.35    2.87 
   0  -7  -7   69.75    2.53 
   0   7   7   66.75    2.49 
   0  -7   7   67.46    2.46 
   0  -7   7   78.77    2.69 
   0  -7  -7   71.13    2.59 
  -1  -7  -7   40.83    1.62 
   1   7  -7   40.30    1.87 
  -1  -7  -7   43.03    1.59 
  -1   7   7   40.74    1.77 
  -1  -7  -7   43.41    1.58 
  -1  -7  -7   41.14    1.59 
   1   7  -7   39.56    1.55 
  -1   7   7   42.65    1.59 
  -1  -7  -7   41.58    1.54 
   1  -7   7   39.03    1.62 
  -1  -7   7   42.89    1.49 
   1  -7  -7   41.16    1.56 
   1  -7  -7   41.51    1.64 
  -1  -7   7   42.11    1.86 
  -1  -7   7   41.41    1.68 
   1  -7  -7   41.64    1.61 
  -1  -7   7   43.54    1.58 
  -1  -7   7   42.92    1.51 
   1  -7  -7   41.14    1.68 
  -1  -7   7   41.23    1.57 
  -1  -7   7   42.14    1.51 
  -2  -7  -7   11.44    0.53 
  -2  -7  -7   11.54    0.61 
  -2  -7  -7   11.33    0.59 
  -2  -7  -7   11.82    0.56 
  -2  -7  -7   12.07    0.57 
  -2  -7  -7   11.72    0.56 
   2  -7   7   11.32    0.77 
   2   7  -7   11.40    0.57 
  -2  -7  -7   12.02    0.54 
  -2   7   7   11.77    0.59 
  -2   7  -7   12.68    0.79 
  -2  -7   7   12.23    0.53 
   2  -7  -7   12.53    0.64 
  -2  -7   7   12.66    0.60 
  -2  -7   7   12.75    0.67 
  -2  -7   7   11.98    0.58 
  -2   7  -7   13.00    0.69 
  -2  -7   7   12.77    0.63 
  -3  -7  -7   26.76    1.04 
  -3   7   7   28.26    1.35 
  -3   7   7   29.00    1.09 
   3  -7   7   29.89    1.43 
  -3  -7  -7   28.07    1.08 
  -3   7   7   29.93    1.21 
  -3   7   7   27.07    1.06 
  -3   7   7   27.30    1.47 
  -3   7  -7   32.27    1.27 
  -3  -7   7   32.69    1.16 
  -3   7  -7   30.27    1.28 
   3  -7  -7   30.41    1.41 
  -3  -7   7   29.73    1.17 
  -3  -7   7   30.74    1.15 
  -3  -7   7   32.27    1.29 
  -3  -7   7   31.09    1.17 
  -3   7  -7   32.92    1.10 
  -3  -7   7   32.10    1.22 
  -3   7  -7   32.93    1.43 
   3  -7  -7   32.13    1.40 
  -4   7   7    9.99    0.55 
  -4   7   7   10.21    0.53 
   4  -7   7   10.03    0.73 
  -4   7   7    9.88    0.45 
  -4   7   7    9.75    0.46 
  -4   7  -7   10.33    0.43 
  -4   7  -7   10.67    0.56 
   4  -7  -7   10.55    0.68 
  -4   7  -7    9.20    0.48 
  -4   7  -7   11.00    0.55 
  -5   7   7    4.04    0.24 
   5  -7   7    4.69    0.47 
  -5   7   7    4.37    0.30 
  -5   7   7    4.12    0.25 
  -5   7   7    4.26    0.28 
  -5   7   7    4.17    0.24 
  -5   7  -7    2.73    0.25 
   5  -7  -7    3.13    0.39 
  -5   7  -7    2.49    0.21 
  -5   7  -7    2.56    0.16 
   0  -8  -7    4.75    0.36 
   0  -8  -7    4.17    0.35 
   0   8   7    4.40    0.49 
   0  -8   7    4.54    0.27 
   0  -8   7    4.43    0.27 
   0  -8   7    4.39    0.43 
   0  -8   7    3.97    0.52 
   0  -8  -7    4.71    0.32 
   0  -8   7    4.42    0.34 
   0  -8   7    4.86    0.36 
   0  -8   7    5.08    0.34 
   0  -8  -7    4.30    0.37 
   1   8  -7   38.18    1.82 
  -1  -8  -7   44.13    1.59 
  -1  -8  -7   41.30    1.63 
   1  -8   7   46.42    1.72 
  -1  -8  -7   43.20    1.62 
  -1  -8  -7   43.52    1.57 
  -1  -8  -7   44.32    1.61 
   1  -8   7   43.27    1.70 
  -1  -8   7   44.88    1.71 
   1   8   7   43.82    1.94 
   1  -8  -7   43.03    1.67 
   1  -8  -7   42.80    1.56 
   1  -8  -7   44.15    1.94 
   1  -8  -7   43.09    1.59 
  -1  -8   7   44.01    1.61 
  -1  -8   7   44.10    1.62 
  -1  -8   7   42.12    1.54 
   1  -8  -7   43.55    1.70 
   1  -8  -7   42.82    1.63 
  -2  -8  -7   40.18    1.52 
  -2  -8  -7   42.23    1.48 
  -2  -8  -7   39.90    1.42 
  -2  -8  -7   37.48    1.54 
   2   8  -7   42.72    1.79 
  -2  -8   7   46.06    1.59 
  -2   8  -7   36.76    1.96 
  -2   8  -7   44.96    1.54 
  -2  -8   7   44.92    1.59 
  -2   8  -7   44.48    1.68 
  -2  -8   7   43.04    1.63 
   2  -8  -7   44.49    1.68 
  -2  -8   7   42.24    1.59 
  -3   8   7    4.71    0.37 
   3   8  -7    4.93    0.50 
  -3   8   7    4.93    0.27 
   3  -8   7    5.16    0.41 
  -3   8   7    5.18    0.34 
  -3  -8   7    3.41    0.26 
  -3   8  -7    3.76    0.35 
  -4   8   7   20.17    0.74 
  -4   8   7   18.63    0.78 
  -4   8   7   19.49    0.74 
   4  -8   7   19.58    0.87 
   4   8  -7   21.38    1.31 
  -4   8   7   19.54    0.81 
  -4   8   7   19.94    0.77 
  -4   8  -7   19.96    0.86 
  -4   8  -7   19.44    0.80 
  -4   8  -7   20.85    0.72 
  -4   8  -7   20.18    0.78 
   0  -9   7    6.76    0.34 
   0  -9  -7    6.07    0.39 
   0  -9  -7    6.41    0.34 
   0  -9  -7    6.75    0.36 
   0  -9  -7    6.72    0.38 
   0  -9   7    6.71    0.42 
  -1  -9  -7   23.50    0.82 
  -1  -9  -7   21.13    0.86 
   1  -9   7   20.98    0.92 
  -1  -9  -7   23.68    0.85 
  -1  -9  -7   21.23    0.86 
   1  -9  -7   22.83    0.91 
   1  -9  -7   23.24    0.87 
  -1  -9   7   22.37    0.90 
  -1   9  -7   24.44    1.30 
  -1  -9   7   20.39    0.82 
   1  -9  -7   18.91    0.80 
  -1  -9   7   19.38    0.82 
   1   9   7   21.00    0.99 
   2  -9   7   23.29    0.98 
  -2   9   7   19.20    1.08 
   2  -9   7   26.26    1.21 
   2   9  -7   24.80    1.09 
  -2  -9  -7   23.25    0.89 
  -2  -9  -7   21.57    0.85 
  -2  -9   7   23.33    0.87 
   2   9   7   22.38    1.05 
   2  -9  -7   21.54    0.89 
  -2  -9   7   22.49    0.83 
  -2  -9   7   20.31    0.80 
  -2   9  -7   23.06    0.91 
   0   0  -8    1.56    0.14 
   0   0  -8    1.72    0.16 
   0   0   8    1.62    0.10 
   0   0   8    1.58    0.13 
   0   0  -8    1.88    0.21 
   0   0  -8    1.86    0.17 
   0   0  -8    1.77    0.15 
  -1   0   8  131.20    4.33 
  -1   0  -8  123.04    4.16 
  -1   0  -8  120.55    4.25 
  -1   0  -8  122.87    4.10 
   1   0   8  118.11    4.10 
  -1   0  -8  124.22    4.10 
  -1   0  -8  119.38    4.23 
  -1   0   8  119.38    4.10 
  -1   0   8  120.11    4.07 
  -1   0   8  124.78    4.12 
   1   0  -8  122.63    4.13 
  -1   0  -8  118.81    4.14 
  -2   0   8  123.65    4.07 
  -2   0   8  124.49    4.10 
  -2   0  -8  120.74    4.18 
  -2   0  -8  124.98    4.08 
  -2   0  -8  117.47    4.07 
  -2   0   8  126.04    4.10 
   2   0   8  123.17    4.10 
   2   0  -8  110.71    4.12 
  -2   0   8  124.39    4.33 
  -2   0  -8  123.46    4.16 
  -3   0  -8   20.51    0.82 
  -3   0  -8   19.74    0.70 
  -3   0   8   21.11    0.75 
  -3   0   8   20.05    0.73 
  -3   0  -8   19.97    0.74 
   3   0   8   20.46    0.75 
  -3   0  -8   19.01    0.85 
   3   0  -8   20.16    0.80 
   4   0   8    0.21    0.07 
  -4   0  -8    0.13    0.11 
  -4   0  -8    0.04    0.10 
   4   0  -8    0.15    0.11 
  -4   0  -8    0.10    0.09 
  -4   0   8    0.05    0.06 
  -5   0   8    4.70    0.25 
  -5   0  -8    4.84    0.37 
   5   0  -8    5.78    0.35 
  -5   0  -8    4.89    0.27 
  -6   0   8    0.32    0.18 
  -6   0   8    0.40    0.09 
  -6   0  -8    0.16    0.15 
  -6   0  -8    0.31    0.15 
  -6   0  -8    0.25    0.15 
  -6   0   8    0.04    0.13 
  -6   0   8    0.50    0.23 
  -7   0   8  197.41    6.84 
  -7   0  -8  202.88    6.68 
  -7   0   8  198.95    6.80 
  -8   0   8   15.90    0.68 
   0  -1  -8  331.18   10.89 
   0   1  -8  327.42   10.75 
   0   1  -8  294.13   10.72 
   0  -1  -8  324.14   10.74 
   0   1   8  332.78   10.73 
   0   1  -8  336.35   10.75 
   0   1  -8  334.30   10.77 
   0  -1  -8  326.19   10.75 
   0   1  -8  325.79   10.75 
   0  -1   8  328.81   10.68 
   0  -1   8  311.00   10.72 
   0  -1  -8  305.08   10.72 
  -1   1   8   65.27    2.25 
   1  -1   8   61.17    2.22 
  -1  -1  -8   65.18    2.29 
  -1  -1  -8   65.42    2.21 
   1   1  -8   64.14    2.25 
  -1  -1  -8   65.08    2.27 
  -1  -1  -8   66.00    2.22 
  -1   1   8   66.04    2.23 
  -1  -1  -8   64.71    2.34 
  -1  -1  -8   66.46    2.36 
  -1   1  -8   62.47    2.19 
  -1   1  -8   61.95    2.31 
   1  -1  -8   63.29    2.18 
  -1   1  -8   61.76    2.32 
  -1   1  -8   59.63    2.15 
   1   1   8   63.13    2.15 
  -1  -1   8   61.35    2.32 
  -1   1  -8   63.41    2.15 
  -1  -1   8   60.85    2.15 
  -1   1  -8   67.18    2.20 
  -1  -1   8   63.91    2.11 
  -1  -1   8   62.90    2.16 
  -2  -1  -8   46.17    1.60 
  -2  -1  -8   47.78    1.71 
  -2   1   8   44.59    1.64 
  -2   1   8   47.24    1.63 
  -2  -1  -8   47.84    1.60 
   2   1  -8   45.96    1.65 
  -2   1   8   46.69    1.63 
  -2   1   8   46.34    2.01 
  -2  -1  -8   46.44    1.68 
   2  -1   8   47.01    1.63 
  -2  -1   8   49.78    1.71 
   2  -1  -8   48.79    1.76 
   2   1   8   49.40    1.72 
  -2   1  -8   48.45    1.71 
  -2  -1   8   50.23    1.72 
  -2   1  -8   49.66    1.68 
  -2  -1   8   48.86    1.69 
  -2  -1   8   50.22    1.91 
  -2   1  -8   49.61    1.79 
  -2   1  -8   50.12    1.77 
  -3  -1  -8    1.57    0.20 
   3  -1   8    0.93    0.11 
  -3   1   8    0.86    0.08 
  -3   1   8    0.79    0.10 
  -3   1   8    0.90    0.11 
  -3   1   8    0.94    0.10 
  -3  -1  -8    0.86    0.11 
   3   1  -8    0.81    0.13 
  -3  -1  -8    1.02    0.15 
  -3   1  -8    0.31    0.08 
  -3  -1   8    0.35    0.07 
  -3  -1   8    0.40    0.09 
   3  -1  -8    0.49    0.14 
   3   1   8    0.38    0.08 
  -4  -1  -8   12.20    0.61 
   4  -1   8   11.76    0.51 
  -4  -1  -8   12.63    0.51 
  -4   1   8   11.99    0.49 
  -4   1   8   12.22    0.53 
  -4  -1  -8   12.52    0.64 
   4   1  -8   12.65    0.56 
   4  -1  -8   11.68    0.56 
   4   1   8   12.04    0.47 
  -4   1  -8   11.18    0.60 
  -4  -1   8   11.38    0.46 
   5   1  -8   14.36    0.64 
   5  -1   8   13.53    0.59 
  -5  -1  -8   14.75    0.71 
  -5  -1  -8   14.56    0.59 
  -5   1  -8   12.05    0.62 
  -5  -1   8   11.34    0.46 
   5  -1  -8   11.63    0.57 
  -6   1   8    3.64    0.33 
  -6  -1  -8    3.56    0.25 
  -6   1   8    3.36    0.20 
  -6   1   8    3.13    0.31 
  -6   1   8    3.31    0.37 
  -6  -1  -8    3.37    0.30 
  -6   1   8    3.35    0.23 
  -6   1  -8    5.41    0.39 
  -6  -1   8    5.50    0.40 
  -6   1  -8    5.41    0.32 
  -6   1  -8    5.67    0.35 
  -6  -1   8    5.39    0.24 
  -7   1   8   39.72    1.48 
  -7   1   8   38.11    1.37 
  -7   1   8   40.72    1.57 
  -7   1   8   38.54    1.50 
  -7  -1   8   38.23    1.48 
  -7   1  -8   38.53    1.37 
  -8   1   8   23.64    0.94 
   0   2  -8    5.04    0.29 
   0  -2  -8    5.36    0.27 
   0   2  -8    4.94    0.31 
   0   2   8    5.20    0.27 
   0  -2   8    5.15    0.22 
   0  -2  -8    5.05    0.26 
   0  -2  -8    4.56    0.37 
   0  -2  -8    5.04    0.28 
   1   2  -8   54.65    2.01 
  -1  -2  -8   55.11    1.91 
   1  -2   8   54.58    1.94 
  -1  -2  -8   56.75    1.98 
  -1   2   8   55.31    1.97 
  -1  -2  -8   56.02    2.00 
   1   2  -8   52.35    1.95 
  -1  -2  -8   55.80    1.91 
  -1  -2  -8   57.85    1.92 
  -1  -2  -8   58.44    2.08 
  -1  -2   8   57.81    2.22 
  -1   2  -8   60.58    2.08 
  -1   2  -8   60.41    2.03 
  -1  -2   8   57.25    1.97 
   1   2   8   58.17    2.02 
  -1   2  -8   59.39    2.21 
  -1   2  -8   53.90    2.01 
  -2  -2  -8   41.28    1.51 
  -2   2   8   41.09    1.47 
  -2  -2  -8   40.83    1.54 
   2  -2   8   40.58    1.46 
  -2   2   8   40.27    1.46 
  -2  -2  -8   40.42    1.42 
   2   2  -8   41.68    1.48 
  -2  -2  -8   40.70    1.44 
  -2   2   8   42.63    1.48 
  -2  -2   8   38.47    1.33 
  -2   2  -8   38.94    1.44 
   2  -2  -8   37.71    1.41 
  -2   2  -8   38.86    1.37 
   2   2   8   38.22    1.37 
  -2   2  -8   38.65    1.35 
  -3  -2  -8   36.60    1.43 
  -3   2   8   35.45    1.33 
  -3  -2  -8   36.10    1.27 
  -3   2   8   37.15    1.33 
   3  -2   8   37.47    1.33 
  -3  -2  -8   36.10    1.30 
  -3  -2  -8   36.19    1.38 
   3   2  -8   37.43    1.35 
  -3   2  -8   37.83    1.30 
   3  -2  -8   35.46    1.38 
   3   2   8   37.51    1.32 
  -3  -2   8   35.38    1.28 
  -3  -2   8   36.99    1.29 
  -3   2  -8   37.69    1.42 
  -4  -2  -8   35.41    1.48 
   4   2  -8   38.41    1.40 
  -4   2   8   36.93    1.38 
   4  -2   8   39.52    1.38 
  -4  -2  -8   36.49    1.35 
  -4   2   8   36.17    1.34 
  -4   2   8   38.58    1.53 
  -4  -2   8   41.89    1.38 
  -4   2  -8   38.88    1.52 
  -4   2  -8   37.74    1.40 
   4   2   8   40.76    1.40 
   4  -2  -8   37.36    1.49 
  -5  -2  -8    3.29    0.23 
  -5  -2  -8    3.59    0.24 
   5  -2   8    3.43    0.24 
   5   2  -8    3.02    0.25 
  -5   2  -8    4.09    0.34 
   5  -2  -8    3.97    0.32 
  -5  -2   8    3.46    0.20 
  -6   2   8   81.05    2.79 
  -6   2   8   74.22    2.66 
  -6  -2  -8   75.16    2.66 
  -6   2   8   77.41    2.85 
  -6   2  -8   84.09    2.92 
  -6  -2   8   84.16    3.01 
  -6   2  -8   83.32    2.88 
  -6  -2   8   83.06    2.80 
  -6   2  -8   83.79    2.85 
  -7   2   8   17.51    0.76 
  -7   2   8   17.36    0.66 
  -7   2   8   18.17    0.78 
  -7   2   8   17.23    0.82 
  -7  -2   8   16.52    0.74 
  -7   2  -8   16.67    0.69 
  -7   2  -8   16.48    0.65 
   0  -3  -8  306.53    9.96 
   0  -3   8  302.89    9.89 
   0   3   8  285.43    9.96 
   0  -3  -8  290.50    9.95 
   0  -3  -8  310.17   10.00 
   0   3  -8  300.49   10.04 
   0   3   8  295.34    9.95 
  -1  -3  -8   10.02    0.46 
  -1   3   8    8.53    0.40 
   1   3  -8    8.81    0.48 
  -1  -3  -8    8.56    0.45 
   1  -3   8    8.78    0.41 
   1   3  -8    8.20    0.42 
  -1  -3  -8    8.83    0.37 
  -1  -3  -8    8.62    0.37 
  -1  -3  -8    8.53    0.39 
  -1   3  -8    6.84    0.35 
  -1   3  -8    6.28    0.34 
  -1   3  -8    6.94    0.39 
  -1  -3   8    6.93    0.29 
   1   3   8    6.73    0.34 
  -2  -3  -8   24.84    0.99 
   2   3  -8   24.85    0.96 
  -2  -3  -8   24.34    1.01 
  -2  -3  -8   25.26    0.89 
  -2  -3  -8   24.79    0.91 
   2   3  -8   24.69    1.04 
  -2   3   8   24.82    0.94 
   2  -3   8   24.79    0.96 
  -2   3   8   24.03    0.97 
  -2   3   8   23.59    0.95 
  -2   3  -8   22.44    0.85 
   2   3   8   22.56    0.86 
  -2   3  -8   23.14    0.87 
  -2   3  -8   21.77    0.95 
  -3   3   8  101.47    3.45 
  -3  -3  -8   97.99    3.41 
  -3  -3  -8   99.91    3.37 
  -3   3   8  102.61    3.63 
   3  -3   8   97.65    3.46 
   3   3  -8  100.96    3.47 
  -3  -3  -8  101.49    3.51 
  -3   3   8  100.66    3.46 
  -3   3   8   98.61    3.42 
  -3   3  -8   92.51    3.13 
  -3   3  -8   91.20    3.06 
  -3  -3   8   91.93    3.10 
   3   3   8   94.12    3.14 
  -3  -3   8   85.17    3.10 
  -3   3  -8   92.23    3.16 
   3  -3  -8   93.09    3.24 
  -3  -3   8   93.31    3.11 
   4  -3   8  113.34    3.89 
  -4  -3  -8  112.68    3.85 
   4   3  -8  117.48    3.90 
  -4  -3  -8  115.64    3.84 
  -4   3   8  107.47    3.84 
  -4  -3  -8  113.02    3.77 
  -4   3   8  108.79    4.05 
  -4   3   8  112.38    3.87 
  -4  -3   8  121.13    3.92 
   4  -3  -8  115.42    4.08 
  -4   3  -8  114.84    4.09 
  -4   3  -8  114.66    4.07 
  -4  -3   8  117.67    3.93 
   4   3   8  120.94    3.95 
  -4   3  -8  110.17    3.95 
  -5  -3  -8   13.78    0.60 
  -5   3   8   14.97    0.78 
  -5  -3  -8   14.41    0.63 
  -5   3  -8   15.88    0.74 
  -5  -3   8   14.90    0.62 
  -5  -3   8   15.35    0.59 
  -5   3  -8   16.43    0.67 
  -6  -3  -8   17.01    0.69 
  -6   3   8   16.27    0.81 
  -6   3   8   16.45    0.76 
  -6   3   8   16.33    0.68 
  -6   3  -8   16.16    0.65 
  -6   3  -8   16.32    0.68 
  -6   3  -8   15.30    0.63 
  -7   3   8   34.46    1.38 
  -7   3   8   32.55    1.23 
  -7   3   8   38.32    1.35 
  -7   3  -8   33.91    1.23 
  -7   3  -8   35.49    1.26 
   0  -4  -8   23.27    0.92 
   0  -4  -8   24.97    0.93 
   0   4  -8   23.07    1.02 
   0  -4  -8   24.31    0.98 
   0   4  -8   23.06    0.91 
   0  -4  -8   24.00    0.89 
   0   4   8   23.78    0.93 
   0   4   8   24.70    0.96 
  -1  -4  -8  176.46    5.85 
   1   4  -8  169.60    5.90 
  -1  -4  -8  174.85    5.81 
   1   4  -8  178.55    6.00 
  -1  -4  -8  178.02    5.95 
  -1   4   8  176.20    5.88 
  -1  -4  -8  173.97    5.83 
  -1  -4  -8  163.81    5.83 
   1   4   8  159.96    5.61 
  -1   4  -8  163.60    5.62 
  -1  -4   8  167.93    5.53 
  -1   4  -8  162.91    5.71 
   1  -4  -8  173.26    5.66 
  -2   4   8   83.50    2.80 
   2   4  -8   82.11    2.81 
  -2  -4  -8   81.14    2.72 
   2  -4   8   79.99    2.80 
  -2  -4  -8   79.21    2.75 
  -2   4   8   72.02    2.96 
  -2  -4  -8   78.96    2.84 
  -2  -4  -8   80.89    2.73 
  -2  -4  -8   78.00    2.72 
  -2  -4   8   76.34    2.61 
  -2  -4   8   76.87    2.61 
  -2   4  -8   77.37    2.67 
   2   4   8   76.13    2.68 
  -2  -4   8   73.98    2.61 
  -2   4  -8   78.92    2.69 
   3   4  -8   62.87    2.22 
  -3   4   8   60.63    2.19 
  -3  -4  -8   58.94    2.14 
  -3   4   8   61.63    2.19 
  -3  -4  -8   62.53    2.26 
   3  -4   8   58.86    2.21 
  -3  -4  -8   60.13    2.14 
  -3  -4  -8   61.80    2.11 
  -3   4   8   61.74    2.19 
  -3   4   8   64.28    2.42 
  -3   4  -8   52.03    1.87 
  -3   4  -8   51.36    2.03 
  -3  -4   8   49.64    1.81 
  -3   4  -8   53.12    1.86 
   3   4   8   53.82    1.87 
  -3  -4   8   52.75    1.81 
  -3  -4   8   53.23    1.82 
  -3   4  -8   51.23    1.79 
  -4   4   8   21.87    0.79 
  -4   4   8   24.43    1.12 
  -4  -4  -8   21.26    0.86 
  -4   4   8   22.47    0.92 
  -4  -4  -8   22.45    0.81 
   4  -4   8   22.79    0.94 
  -4  -4  -8   22.10    0.89 
   4   4  -8   22.32    0.93 
  -4  -4   8   21.01    0.80 
  -4   4  -8   19.99    0.97 
  -4   4  -8   22.34    0.86 
   4   4   8   20.52    0.83 
   4  -4  -8   20.76    0.96 
  -4  -4   8   22.11    0.79 
  -5   4   8    1.11    0.16 
  -5   4   8    0.91    0.30 
  -5  -4  -8    0.43    0.19 
  -5   4   8    0.95    0.22 
  -5  -4  -8    0.62    0.17 
  -5   4   8    1.15    0.19 
  -5   4   8    1.10    0.18 
  -5   4   8    0.91    0.19 
  -5   4  -8    0.76    0.22 
  -5   4  -8    0.69    0.17 
  -5   4  -8    0.72    0.12 
  -5  -4   8    0.57    0.11 
  -5   4  -8    0.64    0.15 
  -5  -4   8    0.61    0.17 
  -6  -4  -8   30.27    1.15 
  -6   4   8   30.68    1.21 
  -6   4   8   30.83    1.14 
  -6   4  -8   27.65    1.15 
  -6   4  -8   28.10    1.07 
  -6   4  -8   28.98    1.05 
  -6   4  -8   29.66    1.06 
  -7   4   8   56.53    2.07 
  -7   4   8   60.90    2.01 
  -7   4  -8   66.92    2.28 
  -7   4  -8   67.08    2.30 
   0   5  -8  173.08    5.86 
   0  -5  -8  179.77    5.88 
   0  -5  -8  169.89    5.90 
   0   5   8  168.99    5.87 
   0  -5  -8  177.32    5.83 
   0  -5  -8  169.26    5.95 
  -1  -5  -8    4.37    0.28 
  -1  -5  -8    5.28    0.31 
  -1   5   8    4.54    0.31 
  -1  -5  -8    4.33    0.24 
  -1  -5  -8    4.38    0.31 
   1   5  -8    4.83    0.29 
  -1  -5  -8    5.11    0.38 
   1   5   8    3.68    0.29 
  -2   5   8   17.09    0.74 
   2   5  -8   16.55    0.73 
  -2   5   8   16.90    0.95 
   2   5  -8   17.33    0.76 
  -2  -5  -8   18.13    0.68 
  -2  -5  -8   15.76    0.65 
  -2  -5  -8   16.30    0.70 
  -2  -5  -8   16.65    0.80 
  -2  -5  -8   16.39    0.67 
   2   5   8   14.82    0.68 
  -2   5  -8   14.59    0.81 
  -2  -5   8   15.14    0.60 
  -2   5  -8   14.38    0.65 
  -2  -5   8   15.13    0.57 
  -2   5  -8   14.92    0.67 
  -3  -5  -8   20.31    0.77 
  -3  -5  -8   19.68    0.91 
   3   5  -8   19.47    0.86 
  -3   5   8   19.74    0.85 
  -3   5   8   24.17    1.07 
  -3   5   8   19.46    1.05 
   3   5  -8   19.91    0.85 
  -3  -5  -8   19.68    0.80 
  -3  -5   8   18.67    0.73 
  -3   5  -8   18.71    0.70 
  -3  -5   8   18.91    0.73 
  -3   5  -8   18.28    0.96 
  -3   5  -8   18.32    0.79 
   3   5   8   18.74    0.79 
  -4   5   8   11.24    0.73 
  -4   5   8   11.57    0.56 
  -4  -5  -8   11.70    0.46 
   4   5  -8   11.55    0.56 
  -4   5   8   11.79    0.43 
  -4   5   8   11.83    0.54 
  -4  -5  -8   11.92    0.54 
  -4  -5  -8   10.66    0.49 
  -4   5  -8   10.77    0.52 
  -4  -5   8   10.31    0.47 
  -4   5  -8   10.70    0.53 
  -4  -5   8   10.67    0.46 
  -4   5  -8    9.74    0.50 
  -4   5  -8   10.24    0.57 
  -4   5  -8   10.86    0.47 
  -4   5  -8   10.53    0.59 
  -4  -5   8   10.53    0.45 
  -4   5  -8   11.47    0.67 
   4  -5  -8   12.32    1.02 
  -5   5   8    2.58    0.24 
  -5   5   8    2.50    0.27 
  -5   5   8    2.38    0.24 
  -5   5   8    2.75    0.23 
  -5  -5  -8    2.50    0.24 
  -5   5   8    3.06    0.39 
  -5   5   8    2.45    0.23 
  -5   5  -8    2.47    0.23 
  -5  -5   8    2.67    0.17 
  -5   5  -8    2.31    0.19 
  -5   5  -8    2.44    0.19 
  -5  -5   8    2.64    0.20 
  -5   5  -8    2.31    0.27 
  -6   5   8    1.44    0.16 
  -6   5   8    1.21    0.20 
  -6   5   8    1.23    0.18 
  -6   5   8    1.21    0.17 
  -6  -5  -8    1.10    0.17 
  -6   5  -8    1.27    0.17 
  -6   5  -8    1.25    0.22 
  -6   5  -8    1.39    0.16 
   0  -6  -8    1.00    0.22 
   0  -6  -8    0.79    0.20 
   0   6   8    1.17    0.20 
   0  -6  -8    1.02    0.26 
   0   6  -8    0.85    0.16 
   1   6  -8   30.28    1.17 
  -1  -6  -8   30.85    1.21 
  -1   6   8   31.32    1.21 
  -1  -6  -8   28.51    1.27 
  -1  -6  -8   29.37    1.02 
  -1  -6   8   34.94    1.31 
   1   6   8   35.60    1.42 
  -1  -6   8   36.35    1.29 
  -2  -6  -8   23.83    0.95 
  -2  -6  -8   25.49    0.99 
   2   6  -8   24.97    1.01 
  -2   6   8   24.05    1.02 
  -2  -6   8   29.65    1.08 
  -2   6  -8   30.69    1.37 
  -2   6  -8   27.37    1.15 
  -3   6   8   22.79    1.18 
   3   6  -8   23.50    0.95 
  -3  -6  -8   22.73    0.81 
   3  -6   8   21.45    1.31 
  -3  -6  -8   23.51    0.89 
  -3  -6  -8   23.79    0.87 
  -3   6   8   21.93    0.94 
  -3   6   8   22.75    0.91 
  -3  -6  -8   22.36    0.88 
  -3   6   8   22.33    0.91 
  -3   6  -8   20.00    1.05 
  -3  -6   8   21.45    0.80 
  -3   6  -8   20.02    0.91 
  -3   6  -8   21.29    0.75 
  -3  -6   8   21.66    0.80 
  -3   6  -8   21.14    0.87 
  -3  -6   8   19.64    0.90 
  -3   6  -8   18.74    0.90 
   3  -6  -8   19.82    1.16 
  -3   6  -8   21.09    1.04 
  -3  -6   8   20.64    0.84 
  -3  -6   8   19.32    0.85 
  -4  -6  -8   32.51    1.21 
  -4  -6  -8   35.73    1.25 
   4  -6   8   32.70    1.73 
  -4   6   8   36.72    1.56 
  -4  -6  -8   35.46    1.28 
  -4   6   8   33.80    1.29 
  -4   6  -8   38.34    1.52 
  -4   6  -8   37.66    1.51 
  -4  -6   8   38.78    1.38 
  -4  -6   8   39.76    1.40 
  -4   6  -8   39.06    1.45 
   4  -6  -8   39.35    1.84 
  -4   6  -8   39.88    1.62 
  -4   6  -8   38.68    1.39 
  -5   6   8    1.31    0.23 
  -5  -6  -8    1.19    0.19 
  -5   6   8    1.70    0.20 
  -5   6   8    1.35    0.18 
  -5   6   8    1.43    0.18 
   5  -6  -8    1.01    0.39 
  -5   6  -8    1.12    0.15 
  -5   6  -8    1.03    0.18 
  -5   6  -8    1.20    0.13 
  -5   6  -8    1.06    0.23 
  -6   6   8   23.99    0.84 
   6  -6   8   21.31    1.16 
  -6   6   8   23.32    0.89 
  -6   6   8   23.13    0.85 
  -6   6   8   23.19    0.84 
   6  -6  -8   24.08    1.10 
  -6   6  -8   21.28    0.83 
  -6   6  -8   23.28    0.89 
  -6   6  -8   21.40    0.80 
   0  -7  -8  117.43    3.93 
   0   7  -8  116.28    4.25 
   0  -7  -8  114.05    4.12 
   0   7   8  118.18    4.42 
   0  -7   8  118.01    4.04 
   0  -7  -8  116.50    4.08 
   0  -7   8  116.70    4.01 
   0   7  -8  116.17    4.02 
   0  -7  -8  111.69    4.31 
   0  -7   8  114.39    4.15 
   0  -7  -8  115.84    4.01 
   0  -7  -8  114.77    4.05 
   0  -7   8  120.02    4.15 
  -1  -7  -8   88.41    3.15 
   1   7  -8   87.60    3.43 
  -1  -7  -8   88.32    3.09 
  -1  -7  -8   85.86    3.12 
  -1   7   8   88.87    3.15 
   1  -7   8   88.08    3.18 
  -1  -7  -8   86.66    3.14 
   1   7  -8   90.70    3.12 
  -1   7   8   90.32    3.32 
  -1  -7  -8   90.70    3.20 
  -1  -7   8   86.20    2.87 
  -1  -7   8   73.55    3.16 
  -1  -7   8   86.53    2.95 
   1  -7  -8   81.02    2.96 
  -1  -7   8   84.70    2.94 
  -1  -7   8   83.51    3.05 
  -1  -7   8   84.13    2.84 
   1  -7  -8   82.97    3.02 
   1  -7  -8   86.34    2.93 
   1  -7  -8   85.96    3.07 
   2   7  -8   12.92    0.88 
  -2  -7  -8   11.78    0.62 
  -2  -7  -8   12.49    0.61 
  -2  -7  -8   11.74    0.55 
  -2  -7  -8   12.34    0.55 
  -2  -7  -8   13.22    0.58 
  -2  -7  -8   12.24    0.58 
   2  -7   8   12.41    0.79 
  -2  -7  -8   12.49    0.58 
  -2  -7   8   10.59    0.54 
  -2  -7   8   10.02    0.59 
  -2  -7   8   10.41    0.55 
  -2  -7   8   10.47    0.47 
  -2   7  -8   10.85    0.50 
  -2   7  -8   10.57    0.72 
  -2  -7   8   10.64    0.52 
  -2   7  -8   10.78    0.55 
  -2   7  -8   10.44    0.61 
  -3   7   8   42.95    1.82 
  -3  -7  -8   41.53    1.51 
  -3   7   8   42.34    1.90 
  -3   7   8   40.24    1.64 
   3  -7   8   42.67    1.91 
  -3   7   8   42.97    1.52 
  -3  -7  -8   44.54    1.54 
  -3   7   8   41.68    1.54 
  -3   7  -8   39.35    1.55 
  -3  -7   8   38.27    1.50 
  -3  -7   8   37.69    1.43 
  -3  -7   8   40.62    1.48 
  -3   7  -8   40.93    1.53 
   3  -7  -8   39.27    1.61 
  -3   7  -8   40.12    1.67 
  -3  -7   8   39.92    1.43 
  -3  -7   8   38.85    1.41 
  -4   7   8   10.23    0.47 
  -4   7   8   10.79    0.48 
  -4   7   8   11.22    0.57 
  -4   7  -8   10.30    0.48 
  -4   7  -8   10.14    0.53 
   4  -7  -8   10.44    0.66 
  -4   7  -8    9.87    0.56 
  -4   7  -8    9.93    0.42 
   4  -7  -8   10.35    0.63 
  -5   7   8   67.57    2.32 
  -5   7   8   66.43    2.25 
  -5   7   8   61.96    2.31 
   5  -7   8   69.40    2.54 
  -5   7   8   67.88    2.27 
  -5   7   8   62.62    2.25 
   5  -7  -8   64.40    2.29 
  -5   7  -8   56.91    2.19 
  -5   7  -8   59.71    2.16 
   5  -7  -8   66.89    2.33 
  -5   7  -8   63.42    2.11 
   0  -8   8    6.42    0.62 
   0  -8  -8    6.45    0.45 
   0  -8  -8    5.71    0.35 
   0  -8  -8    5.90    0.41 
   0  -8   8    6.48    0.39 
   0  -8   8    6.30    0.38 
   0  -8   8    6.43    0.37 
   0  -8  -8    6.41    0.41 
   0  -8   8    6.33    0.48 
   0   8   8    5.78    0.52 
   0  -8   8    6.05    0.31 
  -1  -8  -8    0.50    0.21 
   1  -8   8    0.47    0.20 
  -1  -8  -8    0.34    0.12 
  -1  -8  -8    0.54    0.17 
  -1  -8  -8    0.43    0.17 
   1  -8   8    0.49    0.26 
   1   8  -8    0.51    0.28 
  -1  -8  -8    0.17    0.15 
   1  -8  -8    0.65    0.22 
   1  -8  -8    0.63    0.18 
  -1  -8   8    0.57    0.16 
   1   8   8    0.45    0.33 
   1  -8  -8    0.64    0.22 
   1  -8  -8    0.39    0.13 
  -1  -8   8    0.44    0.15 
   1  -8  -8    0.64    0.29 
  -1  -8   8    0.87    0.29 
   1  -8  -8    0.45    0.21 
  -2  -8  -8   22.06    0.80 
   2   8  -8   23.33    1.11 
   2  -8   8   18.93    1.07 
  -2  -8  -8   24.09    0.92 
  -2  -8  -8   21.77    0.86 
   2   8   8   25.60    1.30 
  -2   8  -8   24.49    1.04 
   2  -8  -8   22.26    1.52 
  -2  -8   8   25.06    0.97 
   2  -8  -8   24.44    1.05 
  -2  -8   8   24.69    0.96 
  -2   8  -8   24.26    1.36 
  -2  -8   8   24.77    1.02 
  -3   8   8    0.85    0.14 
   3   8  -8    0.94    0.30 
  -3   8   8    0.82    0.17 
  -3   8   8    0.87    0.23 
  -3   8  -8    1.62    0.14 
  -3   8  -8    1.82    0.27 
  -3  -8   8    1.74    0.20 
  -4   8   8    4.85    0.27 
  -4   8   8    4.51    0.27 
  -4   8   8    4.52    0.30 
   4   8  -8    4.54    0.41 
  -4   8   8    4.47    0.25 
  -4   8  -8    5.88    0.29 
  -4   8  -8    6.13    0.34 
  -4   8  -8    5.35    0.26 
   0  -9  -8   45.82    1.63 
   0  -9  -8   41.61    1.60 
   0  -9   8   47.43    1.70 
   0  -9  -8   44.59    1.66 
   0  -9   8   44.76    1.59 
   0  -9  -8   48.66    1.61 
  -1  -9  -8    2.94    0.17 
  -1  -9  -8    3.03    0.23 
   1  -9   8    2.43    0.28 
  -1  -9  -8    3.05    0.24 
  -1  -9  -8    3.52    0.22 
   1   9   8    3.27    0.32 
   1  -9  -8    3.06    0.28 
   1  -9  -8    3.15    0.24 
  -1   9  -8    3.71    0.46 
  -1  -9   8    3.10    0.24 
  -1  -9   8    3.40    0.24 
  -1  -9   8    3.41    0.28 
  -2  -9  -8    8.38    0.44 
  -2  -9  -8   10.15    0.41 
   2  -9   8    8.42    0.62 
   2  -9  -8    8.54    0.54 
  -2  -9   8    8.57    0.38 
  -2   9  -8   10.00    0.58 
   2   9   8    7.60    0.51 
   0   0  -9    0.20    0.09 
   0   0   9    0.03    0.07 
   0   0  -9    0.02    0.07 
   0   0  -9    0.00    0.05 
   0   0   9    0.08    0.04 
   0   0  -9    0.33    0.11 
  -1   0  -9    1.14    0.16 
  -1   0  -9    1.46    0.20 
  -1   0  -9    1.44    0.20 
  -1   0   9    1.21    0.10 
   1   0   9    1.39    0.13 
  -1   0  -9    1.43    0.14 
  -1   0  -9    1.42    0.16 
  -1   0  -9    1.35    0.14 
  -1   0   9    1.23    0.13 
  -1   0   9    1.55    0.15 
   1   0  -9    1.27    0.14 
  -2   0  -9  162.23    5.43 
  -2   0  -9  161.84    5.51 
  -2   0  -9  159.15    5.41 
  -2   0  -9  163.73    5.53 
  -2   0   9  162.93    5.41 
   2   0  -9  156.50    5.48 
  -2   0   9  167.08    5.45 
  -2   0   9  163.70    5.45 
   2   0   9  163.73    5.45 
  -2   0   9  162.35    5.45 
  -3   0  -9  201.65    6.72 
  -3   0  -9  202.84    6.82 
  -3   0   9  204.73    6.71 
  -3   0  -9  198.33    6.86 
   3   0   9  200.95    6.74 
  -3   0  -9  194.21    6.68 
  -3   0   9  206.87    6.74 
   3   0  -9  202.21    6.79 
   4   0   9   95.36    3.25 
  -4   0  -9   93.04    3.24 
   4   0  -9   97.22    3.33 
  -4   0  -9   94.04    3.38 
  -4   0   9   97.03    3.23 
  -5   0  -9  187.75    6.28 
  -5   0  -9  185.28    6.43 
   5   0  -9  190.30    6.37 
  -5   0   9  184.76    6.25 
  -6   0  -9   19.93    0.91 
  -6   0   9   21.13    0.75 
  -6   0  -9   20.03    0.79 
  -6   0   9   20.52    0.89 
  -6   0   9   20.27    0.96 
  -6   0   9   19.99    0.90 
  -7   0   9   25.28    0.90 
  -7   0   9   24.92    1.04 
  -7   0   9   26.39    1.09 
  -7   0  -9   24.96    0.94 
   0  -1  -9  384.06   12.55 
   0   1  -9  385.50   12.58 
   0  -1  -9  391.26   12.60 
   0   1  -9  367.82   12.55 
   0   1  -9  386.90   12.54 
   0  -1  -9  381.16   12.53 
   0   1  -9  380.00   12.56 
   0  -1   9  383.23   12.48 
   0   1   9  357.64   12.53 
   0  -1  -9  358.12   12.56 
  -1  -1  -9  109.87    3.68 
  -1   1   9  109.62    3.74 
   1  -1   9  116.01    3.72 
  -1  -1  -9  109.85    3.76 
  -1  -1  -9  108.16    3.69 
  -1  -1  -9  108.64    3.87 
  -1   1   9  109.33    3.76 
  -1  -1  -9  109.73    3.78 
  -1  -1  -9  106.42    3.70 
   1   1  -9  108.92    3.73 
  -1  -1   9  100.17    3.31 
   1   1   9   97.17    3.31 
  -1   1  -9   98.63    3.31 
  -1  -1   9   97.02    3.32 
  -1   1  -9  100.10    3.36 
  -1   1  -9   91.94    3.31 
  -1   1  -9   98.36    3.36 
  -1  -1   9   97.44    3.27 
  -1   1  -9   97.08    3.50 
   2   1  -9   50.74    1.76 
  -2   1   9   50.09    1.74 
  -2  -1  -9   50.24    1.70 
  -2  -1  -9   50.15    1.70 
   2  -1   9   46.52    1.72 
  -2   1   9   48.24    1.74 
  -2   1   9   47.31    1.73 
  -2  -1  -9   50.95    1.82 
  -2  -1  -9   49.63    1.79 
  -2  -1   9   42.33    1.49 
   2  -1  -9   39.62    1.53 
   2   1   9   41.38    1.49 
  -2  -1   9   44.00    1.49 
  -2  -1   9   41.81    1.46 
  -2   1  -9   44.79    1.46 
  -2   1  -9   41.03    1.55 
  -2   1  -9   42.96    1.58 
  -2   1  -9   43.26    1.49 
  -3   1   9   73.32    2.48 
   3   1  -9   74.84    2.57 
   3  -1   9   72.91    2.52 
  -3   1   9   72.49    2.53 
  -3   1   9   71.54    2.49 
  -3   1   9   74.39    2.52 
  -3  -1  -9   70.20    2.58 
  -3  -1  -9   73.55    2.50 
  -3  -1  -9   73.95    2.64 
  -3   1  -9   73.58    2.70 
  -3  -1   9   73.46    2.55 
  -3  -1   9   74.41    2.55 
  -3  -1   9   74.65    2.58 
   3   1   9   78.27    2.58 
   3  -1  -9   75.81    2.65 
  -3   1  -9   75.90    2.55 
  -4   1   9   62.08    2.13 
   4  -1   9   58.86    2.11 
  -4  -1  -9   60.19    2.09 
   4   1  -9   59.36    2.15 
  -4  -1  -9   59.97    2.22 
   4   1   9   57.10    1.99 
   4  -1  -9   55.55    2.07 
  -4  -1   9   58.14    1.97 
  -4   1  -9   57.49    2.12 
   5   1  -9   12.23    0.58 
  -5  -1  -9   11.75    0.62 
   5  -1   9   11.48    0.52 
  -5  -1  -9   11.57    0.51 
   5  -1  -9   11.37    0.58 
  -5  -1   9   11.62    0.46 
  -5   1  -9   10.57    0.60 
  -6  -1  -9    9.41    0.44 
  -6   1   9   10.24    0.41 
  -6   1   9    9.79    0.59 
  -6  -1  -9    9.54    0.54 
  -6   1   9   10.09    0.54 
  -6   1   9    9.14    0.54 
  -6   1  -9    8.95    0.51 
  -6  -1   9    8.59    0.35 
  -6   1  -9    8.13    0.45 
  -6  -1   9    8.58    0.50 
  -6   1  -9    8.46    0.40 
  -7   1   9    7.71    0.44 
  -7   1   9    7.79    0.34 
  -7   1   9    8.78    0.52 
  -7   1   9    7.54    0.45 
  -7  -1   9   10.01    0.53 
  -7   1  -9    9.90    0.44 
   0  -2  -9    2.01    0.17 
   0   2  -9    1.73    0.18 
   0  -2  -9    1.49    0.17 
   0   2   9    1.53    0.15 
   0  -2  -9    1.60    0.16 
   0  -2  -9    1.52    0.19 
   0   2  -9    2.15    0.21 
   0  -2   9    1.75    0.11 
  -1  -2  -9   17.52    0.68 
   1  -2   9   18.09    0.71 
   1   2  -9   17.88    0.77 
  -1  -2  -9   17.58    0.66 
  -1  -2  -9   18.05    0.67 
  -1  -2  -9   17.88    0.74 
  -1  -2  -9   17.15    0.76 
  -1   2   9   17.42    0.69 
   1   2  -9   18.11    0.72 
  -1   2  -9   13.40    0.60 
  -1  -2   9   13.02    0.50 
  -1   2  -9   14.46    0.56 
   1   2   9   12.77    0.55 
  -1   2  -9   13.28    0.56 
  -2   2   9  169.08    5.63 
  -2   2   9  163.69    5.63 
  -2  -2  -9  171.09    5.69 
  -2   2   9  161.60    5.64 
   2   2  -9  167.18    5.65 
  -2  -2  -9  167.17    5.60 
   2  -2   9  169.90    5.64 
  -2  -2  -9  170.68    5.58 
  -2  -2  -9  163.93    5.72 
  -2   2  -9  176.07    5.97 
  -2   2  -9  178.25    6.09 
   2   2   9  178.68    6.00 
  -2   2  -9  183.47    5.99 
  -2  -2   9  177.48    5.95 
   2  -2  -9  177.21    6.04 
   3  -2   9   13.21    0.56 
  -3  -2  -9   13.07    0.65 
  -3  -2  -9   12.47    0.50 
  -3   2   9   12.85    0.70 
  -3  -2  -9   12.34    0.53 
  -3  -2  -9   13.11    0.62 
  -3   2   9   13.90    0.57 
   3   2  -9   12.97    0.58 
  -3   2   9   13.35    0.54 
  -3   2   9   12.88    0.57 
  -3   2   9   12.63    0.56 
  -3  -2   9   14.27    0.55 
  -3   2  -9   13.08    0.70 
  -3  -2   9   14.75    0.51 
  -3  -2   9   14.54    0.56 
  -3   2  -9   13.63    0.66 
  -3   2  -9   14.07    0.60 
   3  -2  -9   14.40    0.65 
   3   2   9   14.83    0.59 
  -3   2  -9   15.03    0.57 
   4  -2   9    4.05    0.27 
  -4   2   9    3.70    0.23 
   4   2  -9    3.46    0.26 
  -4  -2  -9    3.30    0.25 
  -4   2   9    3.59    0.25 
  -4  -2  -9    3.63    0.23 
  -4   2   9    3.47    0.36 
   4  -2  -9    5.05    0.35 
  -4   2  -9    4.68    0.26 
  -4   2  -9    4.34    0.32 
   4   2   9    4.74    0.26 
  -4  -2   9    4.48    0.24 
  -5  -2  -9    3.16    0.23 
  -5   2  -9    3.73    0.28 
  -5  -2   9    3.37    0.21 
  -5   2  -9    3.33    0.32 
  -6   2   9   25.55    1.15 
  -6   2   9   24.92    0.97 
  -6   2   9   25.56    1.06 
  -6   2   9   25.84    1.14 
  -6   2  -9   27.01    0.98 
  -6   2  -9   26.10    1.01 
  -6  -2   9   25.14    0.90 
  -6  -2   9   26.55    1.09 
  -6   2  -9   24.66    1.07 
  -6   2  -9   25.53    0.95 
  -7   2   9   53.17    2.02 
  -7   2   9   50.39    1.95 
  -7   2   9   62.33    2.20 
  -7   2   9   52.59    1.87 
  -7  -2   9   49.22    1.80 
  -7   2  -9   48.46    1.70 
   0  -3   9   96.18    3.21 
   0  -3  -9   92.23    3.36 
   0  -3  -9   97.36    3.32 
   0   3   9   92.28    3.29 
   0  -3  -9   97.41    3.28 
   0   3   9   97.43    3.27 
   0  -3  -9   97.78    3.28 
   0   3  -9   93.82    3.36 
  -1   3   9    1.71    0.16 
  -1  -3  -9    1.82    0.20 
   1   3  -9    1.75    0.23 
  -1  -3  -9    1.72    0.14 
   1   3  -9    1.64    0.18 
  -1  -3  -9    1.87    0.16 
  -1  -3  -9    1.56    0.15 
  -1  -3   9    3.66    0.19 
  -1   3  -9    3.60    0.29 
  -1   3  -9    3.35    0.24 
   1   3   9    3.51    0.23 
  -1   3  -9    3.77    0.25 
  -2  -3  -9   31.37    1.27 
  -2   3   9   31.90    1.20 
  -2  -3  -9   32.10    1.14 
  -2   3   9   30.53    1.21 
  -2  -3  -9   33.01    1.16 
  -2  -3  -9   31.59    1.14 
   2   3  -9   32.79    1.22 
   2  -3   9   30.77    1.20 
  -2   3   9   33.57    1.20 
   2   3  -9   31.60    1.31 
  -2  -3  -9   31.93    1.25 
   2   3   9   28.50    1.06 
  -2  -3   9   27.57    1.01 
  -2   3  -9   28.88    1.07 
  -2   3  -9   26.46    1.04 
  -2   3  -9   29.66    1.13 
  -3  -3  -9   79.31    2.79 
   3   3  -9   83.23    2.90 
  -3   3   9   82.17    2.87 
  -3   3   9   80.66    3.05 
   3  -3   9   85.50    2.90 
  -3   3   9   82.13    2.87 
  -3  -3  -9   83.30    2.83 
  -3   3   9   82.75    2.84 
  -3  -3  -9   82.51    2.94 
   3  -3  -9   91.56    3.12 
  -3  -3   9   91.23    2.97 
  -3   3  -9   90.42    3.03 
  -3   3  -9   77.73    2.90 
  -3   3  -9   87.96    3.00 
   3   3   9   87.70    3.02 
  -3  -3   9   86.64    2.97 
  -4   3   9  135.03    4.74 
  -4   3   9  137.54    4.62 
  -4   3   9  140.63    4.78 
  -4   3   9  144.57    4.99 
   4  -3   9  148.62    4.80 
  -4  -3  -9  138.66    4.67 
  -4  -3  -9  133.29    4.73 
  -4  -3  -9  139.29    4.73 
  -4  -3   9  147.78    4.95 
   4   3   9  148.82    4.98 
   4  -3  -9  150.80    5.12 
  -4   3  -9  149.21    5.14 
  -4   3  -9  149.85    5.09 
  -4   3  -9  137.98    4.98 
  -5   3   9    1.53    0.27 
  -5   3   9    1.10    0.20 
  -5   3   9    1.29    0.19 
  -5   3   9    1.51    0.21 
  -5  -3  -9    1.45    0.18 
  -5  -3  -9    1.31    0.17 
  -5   3   9    1.23    0.24 
  -5   3  -9    2.72    0.21 
  -5   3  -9    2.96    0.28 
  -5  -3   9    3.23    0.19 
  -5   3  -9    2.84    0.31 
  -5   3  -9    2.99    0.24 
  -6  -3  -9   36.71    1.38 
  -6   3   9   37.77    1.52 
  -6   3   9   37.79    1.38 
  -6   3   9   39.48    1.48 
  -6   3  -9   36.16    1.27 
  -6   3  -9   34.52    1.29 
  -6   3  -9   35.48    1.26 
  -6  -3   9   33.56    1.19 
  -7   3   9   11.26    0.58 
  -7   3   9   11.67    0.46 
  -7   3   9   11.52    0.53 
  -7   3  -9    8.37    0.36 
   0   4  -9   62.50    2.42 
   0  -4  -9   65.55    2.32 
   0   4   9   67.07    2.40 
   0   4   9   67.11    2.31 
   0   4  -9   66.61    2.30 
   0  -4  -9   65.34    2.34 
   0  -4  -9   64.71    2.27 
   0  -4  -9   64.36    2.37 
   0  -4  -9   65.99    2.32 
   0  -4  -9   67.28    2.41 
  -1   4   9   12.61    0.58 
  -1  -4  -9   13.91    0.55 
  -1  -4  -9   13.38    0.53 
  -1  -4  -9   12.63    0.54 
  -1  -4  -9   13.62    0.65 
  -1  -4  -9   12.54    0.58 
  -1  -4  -9   13.32    0.57 
   1  -4  -9   14.63    0.70 
  -1  -4   9   16.08    0.57 
  -1   4  -9   14.94    0.66 
   1   4   9   14.11    0.64 
  -1   4  -9   13.53    0.64 
  -2   4   9   13.92    0.78 
   2   4  -9   14.66    0.64 
  -2  -4  -9   13.30    0.55 
   2  -4   9   13.30    0.81 
  -2  -4  -9   13.96    0.67 
  -2   4   9   14.38    0.62 
  -2  -4  -9   13.23    0.56 
  -2  -4  -9   13.51    0.59 
  -2  -4  -9   12.98    0.56 
  -2   4  -9    9.55    0.46 
  -2  -4   9    8.85    0.40 
  -2   4  -9    9.98    0.48 
  -2  -4   9    9.40    0.42 
  -2  -4   9    9.85    0.41 
   2   4   9   10.40    0.48 
  -2   4  -9    8.85    0.45 
  -3   4   9   74.92    2.65 
  -3  -4  -9   77.08    2.60 
  -3  -4  -9   72.24    2.60 
  -3   4   9   73.53    2.62 
   3  -4   9   78.47    2.68 
  -3  -4  -9   74.76    2.72 
  -3   4   9   73.48    2.65 
   3   4  -9   77.82    2.68 
  -3  -4  -9   77.46    2.57 
  -3   4   9   69.53    2.84 
  -3  -4   9   78.05    2.69 
  -3   4  -9   79.06    2.74 
  -3  -4   9   76.05    2.70 
  -3   4  -9   80.37    2.65 
   3   4   9   82.82    2.76 
  -3  -4   9   77.59    2.70 
  -3   4  -9   77.26    2.76 
  -4   4   9   47.51    1.74 
  -4  -4  -9   44.61    1.69 
  -4  -4  -9   47.61    1.63 
  -4   4   9   47.96    1.95 
  -4  -4  -9   46.73    1.68 
  -4   4   9   47.25    1.59 
  -4   4  -9   50.93    1.76 
  -4   4  -9   48.36    1.90 
  -4  -4   9   47.31    1.70 
  -4  -4   9   47.20    1.69 
  -5   4   9   55.10    2.04 
  -5   4   9   58.81    2.08 
  -5   4   9   58.45    2.25 
  -5   4   9   59.29    2.08 
  -5   4   9   55.17    2.12 
  -5   4   9   58.84    2.07 
  -5  -4  -9   60.56    2.07 
  -5   4  -9   48.37    1.75 
  -5   4  -9   50.92    1.84 
  -5  -4   9   51.37    1.80 
  -5   4  -9   53.30    1.81 
  -5  -4   9   53.39    1.78 
  -5   4  -9   51.19    1.96 
  -6   4   9   57.06    2.05 
  -6   4   9   52.38    1.96 
  -6   4   9   51.75    1.90 
  -6   4   9   54.25    1.90 
  -6  -4  -9   54.24    1.90 
  -6   4  -9   57.31    1.99 
  -6   4  -9   55.53    2.09 
  -6   4  -9   59.44    2.01 
  -7   4   9   25.87    1.23 
  -7   4   9   30.15    1.07 
  -7   4   9   29.00    1.01 
  -7   4  -9   25.40    0.90 
   0  -5  -9    4.82    0.30 
   0   5  -9    4.12    0.27 
   0  -5  -9    4.22    0.25 
   0  -5  -9    3.49    0.33 
   0   5   9    3.74    0.28 
   0  -5  -9    3.83    0.31 
  -1  -5  -9    9.39    0.55 
  -1  -5  -9    9.52    0.44 
  -1  -5  -9   10.51    0.51 
  -1   5   9    9.55    0.50 
  -1  -5  -9    9.78    0.41 
  -1  -5  -9    9.67    0.47 
   1   5  -9   10.14    0.49 
   1   5   9    6.40    0.40 
   2   5  -9    6.43    0.37 
  -2  -5  -9    5.98    0.42 
  -2   5   9    6.15    0.38 
  -2  -5  -9    5.73    0.31 
  -2   5   9    6.04    0.59 
   2   5  -9    6.21    0.39 
  -2  -5  -9    6.19    0.36 
  -2  -5  -9    5.74    0.32 
  -2  -5  -9    6.02    0.33 
  -2  -5  -9    6.03    0.33 
  -2   5  -9    8.51    0.60 
   2   5   9    8.69    0.48 
  -2   5  -9    9.20    0.47 
  -2  -5   9    8.87    0.38 
  -2   5  -9    9.23    0.47 
  -2  -5   9    8.98    0.40 
   3   5  -9   49.88    1.81 
  -3   5   9   48.49    2.05 
  -3  -5  -9   47.76    1.74 
  -3   5   9   49.87    1.81 
  -3   5   9   48.48    1.85 
  -3  -5  -9   48.38    1.72 
  -3  -5  -9   48.51    1.75 
  -3  -5   9   40.39    1.50 
  -3  -5   9   41.72    1.50 
  -3   5  -9   42.40    1.57 
  -3   5  -9   42.33    1.46 
  -3   5  -9   43.58    1.77 
  -4   5   9   33.62    1.27 
   4   5  -9   33.75    1.30 
  -4   5   9   32.95    1.29 
  -4  -5  -9   34.03    1.19 
  -4  -5  -9   33.45    1.26 
  -4   5   9   34.22    1.52 
  -4  -5  -9   33.51    1.23 
  -4  -5   9   34.33    1.16 
  -4   5  -9   32.47    1.24 
  -4   5  -9   31.67    1.31 
   4  -5  -9   30.60    1.67 
  -4   5  -9   29.66    1.28 
  -4   5  -9   31.06    1.16 
  -4   5  -9   31.73    1.37 
  -4  -5   9   32.29    1.17 
  -4   5  -9   33.29    1.23 
  -4  -5   9   31.34    1.15 
  -4   5  -9   32.57    1.23 
  -5   5   9    7.69    0.40 
  -5  -5  -9    8.57    0.41 
  -5   5   9    8.22    0.57 
  -5   5   9    8.12    0.40 
  -5   5   9    8.15    0.42 
  -5   5  -9    5.32    0.28 
  -5   5  -9    6.27    0.32 
  -5   5  -9    5.88    0.35 
  -5  -5   9    5.70    0.27 
   5  -5  -9    6.43    0.68 
  -5   5  -9    5.68    0.40 
  -6   5   9    8.96    0.40 
  -6   5   9    9.18    0.41 
  -6  -5  -9    9.37    0.42 
  -6   5   9    9.01    0.41 
  -6   5  -9    8.41    0.37 
  -6   5  -9    8.94    0.46 
   6  -5  -9    8.66    0.69 
  -6   5  -9    8.18    0.39 
   0   6  -9   19.51    0.80 
   0   6   9   18.54    0.81 
   0  -6  -9   19.77    0.87 
   0  -6  -9   15.78    1.09 
   0  -6  -9   18.89    0.77 
   1   6  -9    4.68    0.32 
  -1   6   9    4.83    0.34 
  -1  -6  -9    4.44    0.34 
  -1  -6   9    3.67    0.27 
   1  -6  -9    3.07    0.37 
  -1  -6   9    4.22    0.26 
  -2  -6  -9   31.45    1.28 
  -2  -6  -9   32.41    1.28 
  -2  -6  -9   32.10    1.23 
  -2  -6  -9   31.63    1.20 
   2   6  -9   32.73    1.25 
  -2   6   9   32.67    1.26 
  -2  -6  -9   32.65    1.21 
  -2  -6  -9   30.30    1.21 
  -2  -6  -9   32.86    1.22 
   2  -6   9   33.49    1.66 
  -2   6   9   27.93    1.26 
   2  -6  -9   32.09    1.46 
  -2   6  -9   32.47    1.45 
  -2   6  -9   33.57    1.27 
  -2  -6   9   33.28    1.26 
  -2  -6   9   32.48    1.18 
  -2   6  -9   30.49    1.33 
  -2   6  -9   30.17    1.20 
  -2  -6   9   31.28    1.33 
  -3  -6  -9   22.49    0.85 
  -3  -6  -9   20.32    0.82 
  -3   6   9   22.69    0.89 
  -3   6   9   21.09    1.13 
   3   6  -9   21.76    0.93 
  -3  -6  -9   23.06    0.88 
  -3   6   9   22.82    0.93 
   3  -6   9   21.06    1.26 
  -3  -6  -9   23.65    0.89 
  -3   6   9   23.85    0.91 
  -3  -6   9   21.00    0.81 
  -3   6  -9   20.21    0.72 
  -3  -6   9   20.74    0.87 
  -3   6  -9   22.19    0.89 
   3  -6  -9   20.92    1.14 
  -3   6  -9   19.45    0.94 
  -3  -6   9   20.85    0.86 
  -3  -6   9   22.11    0.81 
  -3   6  -9   21.23    1.04 
  -3   6  -9   20.54    0.93 
  -3  -6   9   19.36    0.91 
  -4   6   9    4.58    0.51 
  -4  -6  -9    4.65    0.27 
  -4  -6  -9    5.13    0.31 
   4  -6   9    4.45    0.59 
  -4  -6  -9    4.39    0.23 
  -4   6   9    4.85    0.31 
  -4  -6   9    6.27    0.31 
  -4   6  -9    6.06    0.50 
  -4  -6   9    6.28    0.33 
  -4   6  -9    6.83    0.33 
  -4   6  -9    6.38    0.43 
  -4   6  -9    6.10    0.37 
   4  -6  -9    6.70    0.63 
  -4   6  -9    6.04    0.43 
  -5   6   9    5.27    0.34 
  -5   6   9    5.13    0.30 
  -5  -6  -9    5.43    0.30 
  -5   6   9    5.58    0.31 
  -5   6   9    5.17    0.30 
   5  -6   9    5.60    0.58 
   5  -6  -9    6.34    0.58 
  -5   6  -9    5.68    0.33 
  -5   6  -9    6.13    0.40 
  -5   6  -9    5.57    0.29 
  -6   6   9    4.25    0.28 
  -6   6   9    3.85    0.21 
  -6   6   9    3.96    0.31 
   6  -6   9    4.58    0.63 
  -6   6  -9    2.85    0.23 
  -6   6  -9    2.20    0.17 
  -6   6  -9    2.63    0.18 
   6  -6  -9    2.89    0.32 
   0  -7   9   89.78    3.16 
   0  -7  -9   89.20    3.01 
   0  -7  -9   84.43    3.07 
   0  -7  -9   85.83    3.11 
   0   7   9   90.96    3.42 
   0  -7   9   88.05    3.15 
   0  -7  -9   82.42    3.18 
   0  -7  -9   88.33    3.07 
   0  -7  -9   87.52    2.92 
   0   7  -9   83.20    3.01 
   0  -7   9   86.40    3.02 
   0  -7   9   78.80    3.05 
   0  -7   9   89.39    2.95 
   0   7  -9   77.18    3.17 
  -1  -7  -9  114.09    4.02 
  -1  -7  -9  115.59    4.05 
   1   7  -9  113.78    4.28 
   1  -7   9  123.48    4.12 
  -1  -7  -9  119.78    4.04 
  -1  -7  -9  116.00    3.99 
  -1   7   9  114.48    4.19 
  -1  -7  -9  111.92    4.08 
  -1  -7   9  108.06    3.51 
   1  -7  -9  106.34    3.66 
  -1  -7   9  100.36    3.72 
  -1  -7   9   95.06    3.61 
   1  -7  -9  105.86    3.70 
  -1  -7   9  110.96    3.64 
   1  -7  -9  106.58    3.61 
  -1  -7   9  104.25    3.86 
  -1  -7   9  106.67    3.55 
   1  -7  -9   97.79    3.71 
   1   7   9  103.06    4.10 
   1  -7  -9  105.73    3.60 
  -2  -7  -9  111.74    3.82 
  -2  -7  -9  111.84    3.88 
  -2  -7  -9  108.91    3.80 
   2  -7   9  113.82    4.04 
  -2  -7  -9  112.76    3.78 
   2  -7   9  107.55    4.04 
  -2  -7  -9  111.21    3.79 
  -2  -7  -9  110.77    3.80 
  -2  -7  -9  107.70    3.85 
  -2   7  -9  119.01    3.78 
  -2   7  -9  111.88    3.85 
  -2  -7   9  108.57    3.84 
  -2  -7   9  113.55    3.83 
  -2  -7   9  108.75    3.92 
  -2   7  -9  105.46    3.92 
  -2  -7   9  111.14    3.76 
  -2  -7   9  110.11    3.81 
  -2   7  -9  107.40    4.04 
  -3   7   9   47.62    1.77 
  -3  -7  -9   42.52    1.63 
   3  -7   9   44.59    1.95 
  -3   7   9   47.68    1.93 
  -3   7   9   47.14    2.00 
  -3   7   9   44.62    1.62 
  -3   7   9   46.97    1.65 
  -3   7  -9   48.66    1.82 
   3  -7  -9   47.63    1.82 
  -3  -7   9   47.92    1.73 
  -3   7  -9   48.59    1.85 
  -3   7  -9   50.53    1.97 
  -3  -7   9   48.43    1.76 
  -3  -7   9   46.92    1.79 
  -3  -7   9   49.97    1.73 
   4  -7   9    4.96    0.55 
  -4   7   9    6.17    0.40 
  -4   7   9    5.76    0.32 
  -4   7   9    5.73    0.30 
  -4   7  -9    5.32    0.30 
  -4   7  -9    4.73    0.34 
  -4   7  -9    4.87    0.25 
   4  -7  -9    4.56    0.38 
  -4   7  -9    5.03    0.35 
  -4  -7   9    4.59    0.30 
   5  -7   9    6.55    0.49 
  -5   7   9    5.43    0.32 
  -5   7   9    5.24    0.31 
  -5   7   9    5.57    0.26 
  -5   7   9    7.55    0.37 
  -5   7   9    5.68    0.28 
   5  -7  -9    6.25    0.36 
  -5   7  -9    6.11    0.27 
  -5   7  -9    6.00    0.30 
  -5   7  -9    6.46    0.35 
   0  -8  -9    0.37    0.16 
   0  -8   9    0.71    0.39 
   0  -8  -9    0.45    0.28 
   0  -8   9    0.61    0.17 
   0  -8  -9    0.53    0.14 
   0   8   9    0.43    0.26 
   0  -8   9    0.43    0.19 
   0  -8   9    0.55    0.14 
   0  -8  -9    0.77    0.24 
  -1  -8  -9    0.03    0.13 
   1  -8   9    0.33    0.19 
   1   8  -9    0.16    0.18 
   1  -8   9    0.09    0.15 
  -1  -8  -9    0.18    0.16 
  -1  -8  -9    0.13    0.10 
  -1  -8  -9    0.24    0.12 
  -1  -8   9    0.55    0.21 
   1  -8  -9    0.39    0.15 
  -1  -8   9    0.43    0.14 
   1  -8  -9    0.62    0.19 
   1   8   9    0.31    0.22 
   1  -8  -9    0.66    0.24 
   2   8  -9   20.60    1.03 
  -2  -8  -9   19.96    0.83 
   2  -8   9   19.73    0.94 
  -2  -8  -9   21.09    0.80 
   2   8   9   18.27    1.03 
   2  -8  -9   18.22    0.83 
  -2  -8   9   17.52    0.79 
  -2  -8   9   17.58    0.74 
  -2  -8   9   17.17    0.73 
   2  -8  -9   20.05    1.14 
  -2   8  -9   18.87    0.85 
   3   8  -9    2.40    0.36 
  -3   8   9    2.42    0.18 
  -3   8   9    2.44    0.25 
  -3   8   9    2.31    0.22 
  -3  -8   9    3.42    0.25 
  -3   8  -9    3.46    0.25 
  -3   8  -9    3.71    0.19 
  -3   8  -9    3.04    0.29 
   0  -9  -9    9.71    0.48 
   0  -9  -9   10.59    0.44 
   0  -9   9   10.77    0.53 
   0  -9  -9    9.69    0.45 
   0  -9  -9   10.25    0.43 
  -1  -9  -9   11.26    0.45 
   1  -9   9   10.25    0.59 
  -1  -9  -9   10.70    0.47 
  -1  -9   9   11.02    0.45 
  -1  -9   9   11.59    0.45 
   1   9   9   11.19    0.62 
   1  -9  -9   10.13    0.50 
  -1  -9   9    8.42    0.49 
   0   0 -10    5.34    0.28 
   0   0  10    5.12    0.22 
   0   0  10    4.89    0.27 
   0   0 -10    5.29    0.32 
   0   0 -10    5.05    0.28 
   0   0 -10    4.79    0.30 
  -1   0  10  360.93   12.53 
  -1   0  10  376.17   12.52 
  -1   0 -10  393.71   12.53 
  -1   0 -10  386.73   12.61 
  -1   0  10  364.49   12.55 
  -1   0 -10  376.20   12.59 
   1   0  10  369.21   12.53 
  -1   0  10  368.55   12.48 
  -1   0 -10  399.40   12.53 
  -2   0  10  636.92   21.29 
   2   0 -10  633.97   21.34 
  -2   0 -10  650.65   21.27 
  -2   0 -10  618.85   21.38 
   2   0  10  645.66   21.30 
  -2   0  10  662.93   21.25 
  -2   0  10  650.14   21.30 
  -2   0 -10  647.25   21.37 
  -3   0  10   43.31    1.61 
  -3   0 -10   45.99    1.77 
  -3   0  10   48.63    1.64 
  -3   0 -10   47.03    1.59 
  -3   0 -10   44.94    1.62 
   3   0 -10   45.65    1.70 
  -3   0  10   47.36    1.61 
  -3   0 -10   46.80    1.73 
  -3   0  10   44.80    1.61 
  -3   0 -10   44.82    1.75 
   3   0  10   50.34    1.66 
  -4   0  10    0.13    0.08 
  -4   0  10    0.04    0.09 
  -4   0 -10    0.05    0.09 
  -5   0 -10    0.12    0.13 
  -5   0  10    0.36    0.12 
  -5   0 -10    0.14    0.11 
  -6   0 -10    9.71    0.45 
  -6   0  10    9.50    0.59 
  -6   0  10    9.59    0.53 
  -6   0  10   10.49    0.57 
  -6   0 -10   10.11    0.56 
  -6   0  10    9.77    0.40 
  -7   0  10    1.34    0.23 
  -7   0  10    1.63    0.14 
  -7   0 -10    1.61    0.18 
  -7   0  10    1.25    0.26 
   0   1  10    1.31    0.14 
   0  -1 -10    1.08    0.15 
   0  -1 -10    0.93    0.18 
   0   1 -10    1.13    0.20 
   0   1 -10    1.40    0.16 
   0  -1 -10    1.19    0.15 
   0   1 -10    1.19    0.15 
   0   1 -10    1.33    0.15 
   0  -1  10    1.28    0.09 
   0  -1 -10    1.14    0.14 
  -1  -1 -10  175.68    5.93 
  -1  -1 -10  185.52    5.94 
  -1   1  10  173.56    5.97 
  -1  -1 -10  176.25    6.02 
  -1  -1 -10  171.76    5.91 
  -1  -1 -10  176.71    6.00 
  -1   1  10  177.95    5.93 
   1  -1  10  179.03    5.95 
  -1  -1  10  158.38    5.23 
  -1   1 -10  157.80    5.28 
  -1   1 -10  158.47    5.28 
  -1   1 -10  159.29    5.33 
  -1  -1  10  151.15    5.27 
   1   1  10  153.98    5.28 
  -1  -1  10  158.75    5.29 
  -1   1 -10  157.02    5.33 
  -2   1  10  127.60    4.29 
  -2   1  10  130.43    4.35 
  -2   1  10  124.60    4.33 
  -2  -1 -10  126.60    4.29 
  -2   1  10  133.30    4.34 
  -2  -1 -10  124.18    4.42 
   2  -1  10  131.38    4.34 
   2   1 -10  122.56    4.36 
  -2  -1 -10  129.79    4.30 
  -2  -1 -10  128.94    4.40 
  -2   1 -10  130.94    4.63 
  -2   1 -10  134.69    4.59 
   2  -1 -10  140.33    4.70 
  -2  -1  10  139.04    4.64 
  -2   1 -10  138.03    4.71 
  -2   1 -10  137.31    4.74 
   2   1  10  137.60    4.65 
  -2  -1  10  139.91    4.64 
  -2  -1  10  140.24    4.60 
  -3  -1 -10   11.73    0.55 
  -3  -1 -10   12.54    0.51 
  -3  -1 -10   12.56    0.64 
  -3   1  10   12.50    0.49 
  -3  -1 -10   11.75    0.62 
  -3   1  10   12.24    0.51 
   3   1 -10   12.07    0.57 
  -3  -1 -10   12.97    0.61 
  -3   1  10   12.38    0.54 
   3  -1  10   12.94    0.54 
  -3   1  10   12.56    0.51 
  -3   1  10   12.68    0.53 
   3   1  10   16.23    0.65 
  -3   1 -10   15.66    0.73 
  -3  -1  10   15.96    0.60 
  -3  -1  10   17.00    0.61 
   3  -1 -10   15.92    0.71 
  -3   1 -10   16.33    0.61 
  -3  -1  10   15.94    0.62 
  -3  -1  10   15.84    0.64 
  -3   1 -10   15.43    0.75 
  -3   1 -10   16.12    0.65 
   4   1 -10   16.01    0.70 
   4  -1  10   15.33    0.65 
  -4   1  10   15.52    0.63 
  -4  -1 -10   14.99    0.75 
  -4  -1 -10   16.11    0.63 
   4  -1 -10   18.72    0.82 
   4   1  10   19.06    0.74 
  -4  -1  10   18.46    0.71 
  -4   1 -10   18.50    0.85 
  -5  -1 -10   24.74    0.95 
  -5  -1 -10   24.86    1.08 
  -5   1  10   25.86    0.94 
  -5   1 -10   25.01    1.02 
  -5  -1  10   26.34    0.95 
  -5   1 -10   26.06    1.11 
  -6   1  10   42.60    1.62 
  -6  -1 -10   42.48    1.51 
  -6   1  10   45.20    1.71 
  -6   1  10   41.48    1.48 
  -6  -1 -10   42.71    1.64 
  -6   1  10   39.92    1.60 
  -6  -1  10   40.85    1.59 
  -6  -1  10   39.88    1.42 
  -6   1 -10   42.17    1.60 
  -6   1 -10   41.39    1.47 
  -7   1  10   24.37    0.87 
  -7   1  10   23.11    1.01 
  -7   1  10   24.12    0.98 
  -7   1  10   24.88    0.98 
  -7  -1  10   25.93    1.04 
   0  -2 -10    2.68    0.25 
   0   2 -10    2.37    0.25 
   0   2  10    2.18    0.18 
   0  -2 -10    2.41    0.21 
   0  -2  10    2.43    0.14 
   0   2 -10    2.67    0.25 
   0  -2 -10    2.45    0.18 
   0  -2 -10    2.47    0.20 
   1  -2  10    1.97    0.18 
  -1  -2 -10    1.76    0.15 
  -1   2  10    2.11    0.17 
  -1  -2 -10    1.89    0.22 
  -1  -2 -10    2.00    0.15 
  -1  -2 -10    2.11    0.17 
   1   2 -10    1.87    0.22 
  -1  -2 -10    2.17    0.21 
   1   2  10    3.92    0.24 
  -1   2 -10    3.33    0.23 
  -1  -2  10    3.29    0.17 
  -1   2 -10    3.46    0.24 
  -2  -2 -10   10.46    0.44 
  -2   2  10    9.94    0.48 
  -2  -2 -10   11.45    0.45 
  -2  -2 -10   10.73    0.53 
  -2  -2 -10   10.95    0.56 
  -2  -2 -10   10.45    0.45 
  -2   2  10   10.49    0.50 
   2   2 -10   10.84    0.51 
   2  -2  10   11.27    0.49 
  -2   2  10   10.70    0.48 
  -2   2 -10   10.47    0.43 
  -2   2 -10    9.68    0.45 
  -2  -2  10   11.30    0.42 
   2   2  10    9.43    0.45 
  -3   2  10   23.58    1.12 
  -3   2  10   25.64    0.99 
  -3  -2 -10   25.93    1.08 
  -3  -2 -10   24.11    1.08 
  -3  -2 -10   24.69    0.95 
  -3  -2 -10   25.90    1.05 
  -3  -2 -10   25.47    0.95 
  -3   2  10   26.55    0.93 
  -3  -2 -10   26.05    0.92 
   3   2 -10   26.15    1.01 
  -3   2  10   24.92    0.95 
  -3   2  10   25.80    0.98 
   3  -2  10   25.49    0.99 
   3  -2 -10   18.41    0.78 
  -3   2 -10   18.34    0.80 
  -3   2 -10   17.43    0.68 
  -3   2 -10   16.80    0.78 
   3   2  10   17.42    0.70 
  -3  -2  10   17.02    0.62 
  -3  -2  10   18.56    0.67 
  -3   2 -10   17.52    0.71 
  -3  -2  10   16.48    0.66 
  -4  -2 -10   29.08    1.06 
  -4  -2 -10   26.99    1.05 
  -4   2  10   27.73    1.09 
  -4   2  10   27.52    1.05 
   4  -2  10   27.98    1.09 
   4   2 -10   29.38    1.12 
  -4   2 -10   28.40    1.02 
   4  -2 -10   28.17    1.13 
  -4  -2  10   26.76    0.99 
  -4  -2  10   26.19    1.00 
   4   2  10   27.54    1.02 
  -4   2 -10   26.35    1.13 
  -5   2  10   79.68    2.99 
  -5   2  10   80.51    2.92 
  -5  -2 -10   82.97    2.83 
  -5   2  10   82.33    2.83 
  -5  -2 -10   82.30    2.82 
  -5   2 -10   76.60    2.69 
  -5   2 -10   75.96    2.71 
  -5   2 -10   77.45    2.74 
  -5  -2  10   81.71    2.66 
  -5   2 -10   80.31    2.85 
  -5  -2  10   76.47    2.68 
  -5  -2  10   77.69    2.82 
  -6   2  10    3.13    0.39 
  -6   2  10    3.09    0.35 
  -6   2  10    2.86    0.23 
  -6   2  10    2.84    0.20 
  -6   2  10    2.70    0.30 
  -6  -2  10    2.18    0.14 
  -6   2 -10    2.50    0.22 
  -6   2 -10    2.12    0.18 
  -6   2 -10    2.50    0.22 
  -6   2 -10    2.44    0.26 
  -6  -2  10    2.58    0.27 
  -7   2  10   10.21    0.50 
  -7   2  10   10.06    0.41 
  -7   2  10   10.10    0.55 
  -7  -2  10   10.33    0.51 
  -7   2 -10   10.13    0.43 
   0  -3 -10    5.80    0.37 
   0  -3  10    5.40    0.24 
   0  -3 -10    5.68    0.34 
   0   3 -10    5.31    0.37 
   0  -3 -10    5.19    0.31 
   0  -3 -10    5.12    0.30 
   0   3  10    4.72    0.30 
  -1  -3 -10   78.47    2.64 
  -1  -3 -10   79.46    2.66 
  -1  -3 -10   72.93    2.62 
  -1  -3 -10   74.49    2.76 
  -1  -3 -10   78.18    2.74 
  -1   3  10   78.23    2.67 
   1   3 -10   76.47    2.80 
  -1   3 -10   70.94    2.54 
  -1   3 -10   71.40    2.47 
  -1   3 -10   69.33    2.46 
  -1  -3  10   72.47    2.39 
   1   3  10   66.34    2.46 
  -2  -3 -10   69.31    2.45 
  -2  -3 -10   71.69    2.49 
   2   3 -10   70.83    2.53 
  -2  -3 -10   72.81    2.46 
  -2  -3 -10   75.28    2.46 
  -2   3  10   68.61    2.62 
   2  -3  10   72.01    2.52 
  -2  -3 -10   70.41    2.60 
  -2   3  10   71.21    2.51 
  -2  -3 -10   74.20    2.58 
  -2   3  10   67.65    2.68 
  -2   3 -10   70.67    2.54 
  -2   3 -10   73.21    2.52 
   2   3  10   77.05    2.57 
  -2  -3  10   74.96    2.49 
  -2  -3  10   71.58    2.50 
  -2   3 -10   70.25    2.56 
  -3  -3 -10   97.28    3.42 
  -3   3  10   89.74    3.52 
   3   3 -10   94.86    3.36 
  -3  -3 -10   94.50    3.30 
  -3   3  10   98.63    3.34 
  -3   3  10   94.08    3.30 
   3  -3  10   98.27    3.36 
  -3   3  10   93.99    3.33 
  -3  -3 -10  100.75    3.30 
  -3  -3 -10   99.32    3.26 
  -3  -3  10   89.30    3.06 
  -3   3 -10   88.61    3.11 
   3   3  10   90.33    3.10 
  -3  -3  10   90.85    3.05 
  -3   3 -10   89.47    3.08 
  -4   3  10   30.27    1.16 
  -4   3  10   35.18    1.32 
  -4  -3 -10   35.58    1.29 
  -4   3  10   37.23    1.52 
  -4  -3 -10   35.72    1.28 
   4   3 -10   34.98    1.35 
   4  -3 -10   24.82    1.13 
  -4  -3  10   25.71    0.99 
  -4  -3  10   27.30    0.99 
  -4   3 -10   26.65    1.03 
  -4   3 -10   29.04    1.18 
  -4   3 -10   28.11    1.13 
   4   3  10   27.67    1.03 
  -5   3  10    5.08    0.32 
  -5  -3 -10    4.87    0.31 
  -5   3  10    5.16    0.43 
  -5   3  10    4.59    0.31 
  -5  -3 -10    4.58    0.29 
  -5   3  10    4.62    0.32 
  -5   3  10    4.64    0.35 
  -5  -3  10    4.02    0.23 
  -5   3 -10    3.77    0.27 
  -5   3 -10    3.98    0.33 
  -5   3 -10    3.80    0.36 
  -5   3 -10    3.66    0.25 
  -6   3  10    4.01    0.39 
  -6   3  10    4.26    0.34 
  -6   3  10    3.96    0.27 
  -6  -3 -10    4.17    0.26 
  -6   3 -10    5.54    0.33 
  -6   3 -10    5.83    0.31 
  -6   3 -10    6.44    0.33 
  -7   3  10    9.79    0.46 
  -7   3  10    8.98    0.49 
  -7   3  10    9.89    0.39 
  -7   3 -10   10.99    0.44 
   0  -4 -10  116.70    4.18 
   0   4 -10  121.65    4.11 
   0  -4 -10  122.34    4.13 
   0  -4 -10  123.31    4.08 
   0  -4 -10  120.55    4.15 
   0  -4 -10  117.29    4.24 
  -1  -4 -10   10.37    0.43 
  -1  -4 -10   10.53    0.55 
  -1  -4 -10    9.85    0.45 
  -1  -4 -10   10.29    0.50 
  -1  -4 -10    9.94    0.47 
  -1   4  10   10.30    0.49 
  -1   4 -10    9.54    0.49 
   1   4  10   10.32    0.50 
  -1  -4  10   10.04    0.42 
  -2  -4 -10  188.00    6.44 
  -2   4  10  190.74    6.36 
  -2   4  10  179.18    6.57 
  -2  -4 -10  194.74    6.30 
  -2  -4 -10  188.43    6.30 
   2   4 -10  190.29    6.40 
  -2  -4 -10  187.95    6.33 
  -2  -4 -10  181.69    6.31 
  -2  -4  10  190.20    6.45 
  -2  -4  10  195.01    6.45 
  -2   4 -10  194.56    6.48 
  -2   4 -10  199.27    6.52 
   2   4  10  191.26    6.53 
  -2   4 -10  186.68    6.52 
  -3  -4 -10   56.88    2.00 
  -3  -4 -10   54.09    1.99 
   3   4 -10   58.27    2.09 
   3  -4  10   54.44    2.07 
  -3  -4 -10   55.59    2.12 
  -3   4  10   55.23    2.02 
  -3  -4 -10   60.45    1.97 
  -3   4  10   56.41    2.05 
  -3   4  10   57.05    2.28 
  -3   4 -10   57.59    2.11 
   3   4  10   59.92    2.12 
  -3  -4  10   57.82    2.05 
  -3   4 -10   58.64    1.98 
  -3  -4  10   61.45    2.06 
  -4   4  10   56.29    2.31 
  -4   4  10   58.69    2.08 
  -4  -4 -10   59.90    2.06 
  -4  -4 -10   57.78    1.98 
  -4  -4 -10   58.32    2.05 
  -4  -4 -10   56.19    2.02 
  -4   4  10   57.54    2.10 
  -4   4  10   58.08    1.94 
  -4   4 -10   62.16    2.28 
  -4   4 -10   61.31    2.13 
  -4  -4  10   60.36    2.06 
  -4   4 -10   56.94    2.18 
  -4   4 -10   58.00    2.07 
  -4   4 -10   58.94    2.10 
  -4  -4  10   57.26    2.08 
  -4   4 -10   58.43    2.23 
  -4   4 -10   59.28    2.13 
  -5   4  10   14.86    0.65 
  -5   4  10   14.24    0.65 
  -5   4  10   14.69    0.63 
  -5   4  10   14.23    0.68 
  -5  -4 -10   14.93    0.63 
  -5   4 -10   17.30    0.82 
  -5   4 -10   17.19    0.68 
  -5   4 -10   17.12    0.72 
  -5  -4  10   17.01    0.65 
  -6   4  10   28.34    1.15 
  -6   4  10   29.47    1.12 
  -6   4  10   28.91    1.06 
  -6   4  10   28.31    1.06 
  -6  -4 -10   28.75    1.07 
  -6   4 -10   25.58    1.07 
  -6   4 -10   26.94    0.98 
  -6   4 -10   26.39    0.97 
  -7   4  10   15.99    0.65 
  -7   4  10   15.84    0.58 
  -7   4 -10   15.60    0.58 
   0   5 -10    5.24    0.31 
   0  -5 -10    4.77    0.33 
   0  -5 -10    4.73    0.29 
   0  -5 -10    4.89    0.37 
   0  -5 -10    5.53    0.37 
   0  -5 -10    5.33    0.34 
  -1   5  10   30.84    1.22 
  -1  -5 -10   31.05    1.22 
  -1  -5 -10   31.13    1.16 
  -1  -5 -10   30.49    1.19 
  -1  -5 -10   31.48    1.10 
   1   5 -10   31.93    1.21 
  -1  -5 -10   31.64    1.30 
  -1  -5  10   35.02    1.27 
   1   5  10   35.66    1.38 
  -2  -5 -10   27.38    1.02 
   2   5 -10   27.08    1.07 
  -2  -5 -10   27.67    1.06 
  -2   5  10   27.28    1.08 
  -2  -5 -10   26.15    1.02 
  -2  -5 -10   26.60    1.02 
  -2  -5 -10   25.79    1.16 
  -2   5 -10   29.69    1.14 
   2   5  10   29.10    1.19 
  -2   5 -10   31.61    1.37 
  -2   5 -10   30.55    1.18 
  -2  -5  10   28.74    1.10 
  -2  -5  10   30.35    1.07 
  -3   5  10    4.53    0.32 
  -3  -5 -10    4.65    0.27 
  -3  -5 -10    3.89    0.28 
  -3   5  10    4.24    0.48 
  -3  -5 -10    4.29    0.29 
  -3  -5 -10    4.36    0.23 
  -3  -5 -10    4.79    0.29 
  -3   5  10    4.59    0.32 
  -3   5  10    4.50    0.32 
   3   5 -10    4.35    0.33 
  -3   5 -10    6.23    0.44 
  -3   5 -10    6.35    0.24 
  -3  -5  10    6.02    0.32 
  -3   5 -10    6.34    0.51 
  -3  -5  10    6.02    0.39 
  -3  -5  10    6.02    0.44 
  -3   5 -10    6.03    0.45 
   3  -5 -10    6.29    0.69 
  -3   5 -10    6.49    0.39 
  -3  -5  10    6.52    0.40 
  -3  -5  10    5.98    0.32 
  -4  -5 -10    1.81    0.15 
  -4   5  10    1.71    0.20 
  -4   5  10    1.88    0.41 
   4   5 -10    1.43    0.20 
  -4   5  10    1.95    0.23 
  -4  -5 -10    1.88    0.22 
  -4  -5 -10    1.71    0.18 
  -4   5 -10    2.00    0.27 
  -4   5 -10    2.24    0.33 
  -4   5 -10    1.99    0.23 
  -4  -5  10    1.48    0.18 
  -4   5 -10    1.99    0.25 
  -4  -5  10    1.98    0.18 
  -4   5 -10    1.88    0.22 
  -4   5 -10    1.69    0.18 
  -4   5 -10    1.79    0.27 
   4  -5 -10    1.64    0.47 
  -4  -5  10    1.84    0.18 
  -5   5  10   18.13    0.73 
  -5   5  10   16.78    0.70 
  -5   5  10   17.97    0.74 
  -5  -5 -10   17.68    0.72 
  -5   5 -10   17.96    0.69 
  -5   5 -10   17.91    0.81 
   5  -5 -10   16.66    1.07 
  -5   5 -10   18.06    0.73 
  -6   5  10    1.14    0.16 
  -6   5  10    1.25    0.15 
  -6   5 -10    1.23    0.19 
  -6   5 -10    1.20    0.14 
   6  -5 -10    1.45    0.37 
  -6   5 -10    1.33    0.15 
   0   6 -10   17.71    0.76 
   0  -6 -10   17.74    1.12 
   0  -6 -10   18.21    0.82 
   0   6  10   17.74    1.13 
   0  -6  10   19.22    1.03 
   0   6 -10   17.19    0.97 
   0  -6 -10   17.93    0.73 
   0  -6 -10   18.21    0.89 
   0  -6 -10   17.68    0.76 
   0  -6  10   17.63    0.79 
   0  -6 -10   18.06    0.82 
  -1  -6 -10   15.83    0.71 
  -1  -6 -10   14.77    0.75 
  -1  -6 -10   14.47    0.68 
  -1  -6 -10   13.58    0.63 
  -1  -6 -10   14.20    0.69 
  -1   6  10   14.39    0.68 
  -1   6  10   14.79    0.91 
   1   6 -10   14.38    0.93 
   1   6 -10   15.13    0.66 
   1  -6  10   14.15    0.88 
   1  -6 -10   11.63    0.56 
   1  -6 -10   12.23    0.63 
  -1  -6  10   12.29    0.59 
   1  -6 -10   12.18    0.64 
  -1  -6  10   11.98    0.52 
  -1  -6  10   10.66    0.88 
   1  -6 -10   11.80    0.68 
  -1  -6  10   12.74    0.65 
  -1  -6  10   12.07    0.69 
  -1   6 -10   11.92    0.70 
  -1  -6  10   11.66    0.53 
  -2   6  10   10.83    0.56 
  -2  -6 -10   11.55    0.52 
  -2  -6 -10   10.88    0.59 
  -2  -6 -10   11.26    0.54 
   2   6 -10   11.02    0.56 
   2   6 -10   10.50    0.87 
  -2  -6 -10   11.14    0.53 
  -2  -6 -10   10.78    0.52 
  -2  -6 -10   11.17    0.58 
   2  -6  10   11.59    0.89 
  -2  -6 -10   11.88    0.55 
  -2   6 -10   12.93    0.55 
  -2   6 -10   11.62    0.59 
  -2  -6  10   11.97    0.68 
  -2  -6  10   11.99    0.52 
  -2   6 -10   11.74    0.76 
  -2   6 -10   12.19    0.68 
   2  -6 -10   11.79    0.69 
  -2   6 -10   11.70    1.04 
  -2  -6  10   11.61    0.58 
  -3  -6 -10   49.14    1.77 
  -3  -6 -10   50.03    1.74 
   3  -6  10   49.48    2.23 
  -3   6  10   50.96    2.30 
  -3   6  10   50.47    1.79 
  -3  -6 -10   47.65    1.77 
  -3   6  10   49.81    1.78 
  -3   6  10   47.89    2.07 
  -3  -6  10   59.15    2.06 
  -3   6 -10   54.70    2.15 
  -3  -6  10   57.42    2.01 
   3  -6 -10   54.92    2.31 
  -3   6 -10   56.96    2.07 
  -3  -6  10   55.90    2.13 
  -3   6 -10   59.27    2.28 
  -3  -6  10   56.62    2.00 
  -3   6 -10   59.51    2.16 
  -3  -6  10   58.75    2.07 
  -4   6  10    2.62    0.40 
  -4  -6 -10    3.11    0.21 
  -4   6  10    2.92    0.25 
   4  -6  10    2.92    0.51 
  -4  -6 -10    2.70    0.24 
   4  -6 -10    3.48    0.46 
  -4   6 -10    3.18    0.27 
  -4   6 -10    2.98    0.31 
  -4   6 -10    3.00    0.32 
  -4   6 -10    2.81    0.22 
  -4  -6  10    3.15    0.27 
  -4   6 -10    3.14    0.37 
  -5   6  10   87.86    2.96 
  -5   6  10   89.55    2.97 
  -5   6  10   86.29    2.97 
   5  -6  10   85.21    3.33 
  -5   6  10   85.75    3.02 
  -5   6 -10   88.42    3.05 
   5  -6 -10   85.52    3.25 
  -5   6 -10   84.67    2.93 
  -5   6 -10   88.60    2.98 
   0  -7 -10    5.48    0.40 
   0   7  10    5.01    0.56 
   0  -7 -10    4.84    0.40 
   0  -7  10    4.90    0.44 
   0  -7  10    4.99    0.45 
   0  -7 -10    4.83    0.40 
   0  -7  10    5.05    0.36 
   0  -7  10    4.83    0.29 
   0  -7 -10    5.16    0.34 
   0  -7  10    4.89    0.35 
  -1  -7 -10   30.10    1.18 
  -1  -7 -10   27.83    1.11 
   1   7 -10   28.35    1.39 
  -1  -7 -10   28.60    1.14 
  -1  -7 -10   29.49    1.18 
  -1   7  10   29.49    1.27 
  -1  -7 -10   29.65    1.21 
   1  -7 -10   31.09    1.28 
   1  -7 -10   31.41    1.20 
   1  -7 -10   30.57    1.17 
  -1  -7  10   31.32    1.21 
  -1  -7  10   31.25    1.21 
  -1   7 -10   31.28    1.33 
  -1  -7  10   30.62    1.14 
   1   7  10   30.46    1.58 
   1  -7 -10   32.31    1.25 
   1  -7 -10   31.26    1.31 
  -1  -7  10   31.47    1.33 
  -1  -7  10   30.12    1.09 
   1  -7 -10   32.09    1.64 
  -2  -7 -10   66.98    2.40 
  -2  -7 -10   64.31    2.33 
   2   7 -10   64.11    2.67 
  -2  -7 -10   65.54    2.34 
  -2  -7 -10   67.87    2.35 
  -2  -7 -10   67.88    2.34 
  -2  -7 -10   67.41    2.31 
   2  -7  10   68.87    2.53 
  -2   7 -10   72.72    3.05 
  -2   7 -10   70.49    2.55 
  -2  -7  10   75.33    2.73 
  -2   7 -10   69.71    2.63 
  -2  -7  10   75.86    2.64 
  -2   7 -10   76.85    2.74 
  -2  -7  10   77.41    2.63 
  -2   7 -10   75.43    2.84 
  -2  -7  10   75.14    2.56 
  -3  -7 -10    4.05    0.26 
   3  -7  10    3.65    0.46 
  -3   7  10    3.62    0.44 
   3   7 -10    3.40    0.46 
  -3   7  10    3.49    0.35 
  -3   7  10    3.50    0.25 
  -3  -7  10    4.25    0.30 
  -3   7 -10    4.64    0.34 
  -3   7 -10    4.36    0.40 
  -3   7 -10    3.56    0.69 
  -3  -7  10    4.71    0.33 
  -3  -7  10    4.25    0.27 
  -4   7  10   42.25    1.60 
  -4   7  10   43.03    1.53 
   4  -7  10   41.39    1.82 
  -4   7  10   43.34    1.54 
  -4   7  10   47.62    1.69 
  -4   7 -10   42.47    1.60 
  -4   7 -10   43.64    1.59 
  -4  -7  10   42.82    1.53 
  -4   7 -10   40.75    1.52 
  -4   7 -10   44.63    1.49 
   0  -8  10    1.13    0.26 
   0   8  10    0.80    0.24 
   0  -8 -10    0.80    0.19 
   0  -8  10    0.78    0.20 
   0  -8 -10    1.01    0.24 
   0  -8 -10    0.98    0.22 
   0  -8 -10    1.15    0.21 
  -1  -8 -10    2.98    0.28 
   1  -8  10    3.22    0.35 
  -1  -8 -10    3.39    0.25 
   1  -8  10    3.13    0.57 
  -1  -8 -10    3.43    0.25 
  -1  -8 -10    3.18    0.29 
   1  -8  10    3.53    0.33 
   1   8  10    3.51    0.43 
   1  -8 -10    3.32    0.25 
  -1  -8  10    3.30    0.27 
   1  -8 -10    3.41    0.33 
  -1  -8  10    3.42    0.35 
   1  -8 -10    3.11    0.28 
  -1   8 -10    3.43    0.55 
  -2   8  10   23.07    1.31 
  -2  -8 -10   26.44    0.98 
   2  -8  10   26.59    1.12 
   2   8 -10   29.18    1.21 
  -2  -8 -10   25.82    1.01 
  -2  -8  10   31.03    1.14 
  -2  -8  10   30.59    1.14 
  -2  -8  10   30.43    1.20 
   2  -8 -10   29.13    1.20 
   2   8  10   31.57    1.43 
   2  -8 -10   31.41    1.43 
  -2   8 -10   30.80    1.23 
  -3   8  10   13.63    0.51 
   3   8 -10   12.50    0.67 
  -3   8  10   12.06    0.57 
  -3   8  10   13.01    0.55 
  -3   8 -10   12.48    0.56 
  -3  -8  10   10.60    0.47 
  -3   8 -10   11.11    0.49 
   3  -8 -10   10.92    0.75 
  -3   8 -10   10.60    0.43 
   0   0 -11   -0.03    0.09 
   0   0 -11    0.03    0.08 
   0   0 -11   -0.04    0.07 
   0   0  11   -0.01    0.04 
   0   0 -11    0.03    0.08 
  -1   0  11  135.70    4.49 
   1   0  11  130.25    4.54 
  -1   0  11  137.09    4.57 
  -1   0 -11  132.41    4.60 
  -1   0 -11  133.44    4.62 
  -1   0 -11  137.90    4.54 
  -1   0 -11  132.58    4.54 
   1   0 -11  133.41    4.61 
  -2   0  11    0.67    0.14 
  -2   0 -11    1.24    0.19 
  -2   0 -11    0.40    0.15 
  -2   0  11    0.53    0.12 
  -2   0  11    0.34    0.09 
   2   0 -11    0.53    0.14 
  -2   0 -11    0.54    0.12 
  -3   0  11   17.78    0.68 
  -3   0 -11   17.01    0.83 
  -3   0 -11   18.25    0.71 
   3   0 -11   17.53    0.77 
  -3   0 -11   18.12    0.66 
   3   0  11   18.36    0.73 
  -3   0 -11   16.47    0.81 
  -3   0  11   17.70    0.68 
  -3   0 -11   18.03    0.79 
  -3   0  11   18.51    0.72 
  -4   0  11   15.12    0.60 
  -4   0  11   14.44    0.58 
  -4   0 -11   15.47    0.74 
   4   0 -11   14.77    0.69 
   4   0  11   13.77    0.61 
  -5   0 -11   52.35    1.98 
  -5   0  11   51.67    1.95 
  -5   0 -11   49.65    1.82 
  -5   0  11   50.39    1.82 
  -5   0  11   52.90    1.82 
  -5   0 -11   52.77    1.83 
  -5   0  11   52.47    2.02 
  -5   0  11   52.78    1.96 
  -6   0 -11    6.06    0.32 
  -6   0 -11    6.14    0.42 
  -6   0  11    5.53    0.39 
  -6   0  11    5.81    0.41 
  -6   0  11    5.68    0.27 
  -6   0  11    5.92    0.44 
  -7   0  11    6.79    0.44 
  -7   0  11    7.42    0.31 
  -7   0 -11    7.35    0.34 
  -7   0  11    7.47    0.42 
   0  -1 -11    0.47    0.13 
   0   1 -11    0.55    0.14 
   0  -1 -11    0.45    0.12 
   0  -1  11    0.65    0.08 
   0  -1 -11    0.52    0.13 
   0  -1 -11    0.42    0.16 
   1  -1  11  108.11    3.77 
  -1  -1 -11  111.34    3.87 
  -1   1  11  109.87    3.76 
  -1  -1 -11  107.35    3.73 
  -1   1  11  113.21    3.72 
  -1  -1 -11  110.10    3.76 
  -1  -1 -11  110.51    3.83 
  -1  -1 -11  114.43    3.75 
  -1   1 -11  110.76    3.96 
  -1   1 -11  117.18    3.97 
   1   1  11  114.36    3.97 
  -1  -1  11  119.61    4.01 
  -1  -1  11  116.73    3.98 
  -1   1 -11  118.17    4.03 
  -1  -1  11  118.96    3.91 
   2   1 -11  202.28    6.52 
  -2   1  11  194.07    6.47 
   2  -1  11  198.80    6.47 
  -2   1  11  186.37    6.46 
  -2   1  11  184.20    6.48 
  -2  -1 -11  190.72    6.43 
  -2  -1 -11  190.52    6.42 
  -2  -1 -11  193.01    6.43 
  -2  -1 -11  186.94    6.56 
  -2  -1 -11  195.74    6.55 
  -2   1  11  192.83    6.42 
  -2   1 -11  188.81    6.35 
  -2  -1  11  187.13    6.35 
  -2   1 -11  186.14    6.46 
  -2  -1  11  191.69    6.36 
  -2  -1  11  194.75    6.31 
  -2   1 -11  180.61    6.30 
   2   1  11  195.87    6.37 
  -3   1  11   43.77    1.55 
  -3  -1 -11   44.71    1.56 
  -3  -1 -11   43.05    1.57 
   3  -1  11   45.46    1.60 
  -3  -1 -11   44.71    1.69 
  -3   1  11   43.20    1.56 
  -3  -1 -11   43.25    1.73 
  -3   1  11   45.70    1.60 
  -3  -1 -11   45.23    1.72 
   3   1 -11   43.74    1.65 
  -3   1  11   43.90    1.60 
   3   1  11   54.42    1.90 
  -3   1 -11   52.05    1.99 
   3  -1 -11   52.98    1.96 
  -3   1 -11   53.41    1.89 
  -3  -1  11   54.74    1.84 
  -3   1 -11   52.39    1.84 
  -3   1 -11   52.04    2.02 
  -3  -1  11   53.71    1.84 
   4  -1  11    4.96    0.31 
  -4   1  11    4.86    0.29 
  -4  -1 -11    5.16    0.28 
  -4  -1 -11    5.30    0.39 
   4   1 -11    5.19    0.35 
  -4   1 -11    8.66    0.53 
   4   1  11    9.17    0.44 
  -4  -1  11    9.71    0.42 
   4  -1 -11    8.81    0.51 
  -4  -1  11   10.68    0.41 
  -5   1  11   35.50    1.49 
  -5  -1 -11   34.87    1.27 
  -5   1  11   36.16    1.41 
  -5   1  11   35.90    1.42 
  -5  -1 -11   33.55    1.30 
  -5  -1 -11   35.38    1.30 
  -5   1  11   34.83    1.31 
  -5  -1 -11   37.51    1.45 
  -5   1  11   37.69    1.29 
  -5   1 -11   38.36    1.41 
  -5  -1  11   38.76    1.53 
  -5   1 -11   37.05    1.40 
  -5  -1  11   41.46    1.39 
  -5   1 -11   39.91    1.56 
  -5  -1  11   38.24    1.38 
  -6   1  11   18.26    0.85 
  -6   1  11   20.08    0.74 
  -6   1  11   19.61    0.77 
  -6   1  11   20.31    0.93 
  -6   1  11   20.21    0.86 
  -6  -1 -11   19.64    0.88 
  -6  -1 -11   19.61    0.76 
  -6  -1  11   22.96    1.00 
  -6   1 -11   23.67    1.01 
  -6   1 -11   24.75    0.90 
  -6  -1  11   22.76    0.84 
  -7   1  11   15.29    0.66 
  -7   1  11   14.51    0.69 
  -7   1  11   15.10    0.57 
  -7   1  11   14.78    0.66 
  -7   1 -11   11.63    0.46 
  -7  -1  11   10.59    0.47 
  -7  -1  11   11.49    0.55 
   0  -2 -11   59.53    2.00 
   0  -2 -11   55.34    2.09 
   0  -2 -11   53.89    1.99 
   0  -2 -11   56.43    2.04 
   0  -2  11   55.51    1.91 
   0   2 -11   56.04    2.07 
  -1  -2 -11    1.97    0.16 
   1  -2  11    1.48    0.17 
  -1  -2 -11    1.70    0.22 
  -1  -2 -11    1.60    0.21 
   1   2 -11    1.69    0.23 
  -1  -2 -11    1.94    0.16 
  -1   2  11    1.63    0.15 
  -1  -2 -11    1.87    0.17 
  -1   2 -11    0.99    0.14 
  -1   2 -11    0.82    0.16 
  -1  -2  11    1.10    0.11 
   2   2 -11  175.54    5.44 
  -2   2  11  144.72    5.13 
  -2  -2 -11  154.41    5.21 
  -2  -2 -11  146.24    5.08 
  -2  -2 -11  149.97    5.08 
   2   2 -11  158.39    5.17 
  -2  -2 -11  147.39    5.11 
  -2  -2 -11  150.69    5.08 
  -2   2  11  147.06    5.31 
  -2   2  11  145.17    5.14 
  -2  -2 -11  143.86    5.23 
  -2  -2 -11  152.46    5.24 
  -2   2  11  148.46    5.12 
   2  -2  11  152.67    5.14 
  -2   2 -11  153.35    5.15 
   2   2  11  149.31    5.15 
  -2   2 -11  146.82    5.16 
  -2   2 -11  156.33    5.25 
  -2   2 -11  153.42    5.11 
  -2  -2  11  151.43    5.09 
  -2  -2  11  155.29    5.16 
  -3   2  11    1.13    0.16 
  -3  -2 -11    1.30    0.15 
  -3  -2 -11    1.02    0.15 
  -3   2  11    1.05    0.17 
  -3   2  11    0.95    0.12 
  -3   2  11    0.95    0.26 
  -3   2  11    1.19    0.17 
   3   2 -11    1.09    0.18 
  -3  -2 -11    1.08    0.20 
   3  -2  11    1.07    0.16 
  -3  -2 -11    0.82    0.12 
  -3  -2 -11    0.96    0.21 
   3   2  11    1.16    0.16 
  -3  -2  11    1.34    0.15 
  -3  -2  11    1.39    0.12 
  -3   2 -11    1.39    0.19 
   3  -2 -11    2.09    0.23 
  -3   2 -11    1.71    0.16 
  -3  -2  11    1.53    0.14 
  -3   2 -11    1.39    0.21 
  -4  -2 -11   52.46    2.00 
  -4   2  11   53.17    1.90 
   4   2 -11   51.25    1.94 
  -4  -2 -11   54.04    1.87 
   4  -2  11   49.83    1.90 
  -4  -2 -11   54.29    1.87 
  -4  -2  11   51.95    1.78 
  -4   2 -11   47.42    1.79 
  -4  -2  11   51.84    1.78 
   4  -2 -11   51.16    1.93 
   4   2  11   51.68    1.82 
  -4   2 -11   51.47    1.93 
  -5  -2 -11   23.07    0.90 
  -5   2  11   23.25    0.92 
  -5   2  11   24.38    1.08 
  -5   2  11   22.29    0.98 
  -5   2  11   23.47    0.92 
  -5   2 -11   24.89    1.00 
  -5   2 -11   26.16    0.98 
  -5   2 -11   25.19    1.00 
  -5  -2  11   25.51    0.92 
  -5  -2  11   27.31    0.96 
  -5   2 -11   25.99    1.11 
  -5  -2  11   26.85    1.11 
  -6   2  11   10.76    0.46 
  -6   2  11   11.41    0.50 
  -6   2  11   10.92    0.62 
  -6   2  11   10.56    0.65 
  -6   2  11   11.53    0.59 
  -6  -2  11   11.89    0.60 
  -6   2 -11   11.74    0.48 
  -6  -2  11   11.63    0.45 
  -6   2 -11   12.03    0.60 
  -6   2 -11   11.96    0.51 
  -7   2  11    2.93    0.18 
  -7   2  11    3.03    0.29 
  -7   2  11    2.87    0.24 
  -7   2 -11    4.01    0.23 
  -7  -2  11    4.01    0.29 
   0  -3 -11  187.59    6.51 
   0  -3  11  195.70    6.37 
   0  -3 -11  196.29    6.46 
   0  -3 -11  188.81    6.47 
   0  -3 -11  192.84    6.58 
   0   3 -11  181.54    6.56 
   0  -3 -11  195.85    6.41 
  -1  -3 -11   53.29    2.06 
  -1  -3 -11   57.85    2.04 
  -1  -3 -11   53.90    1.97 
  -1  -3 -11   55.79    1.92 
  -1  -3 -11   53.60    1.90 
  -1  -3 -11   51.75    2.14 
  -1   3  11   54.99    1.95 
  -1  -3 -11   56.86    1.95 
  -1   3 -11   55.12    1.98 
  -1  -3  11   55.00    1.89 
  -1   3 -11   53.74    1.98 
   1   3  11   55.58    1.98 
  -2  -3 -11   76.34    2.62 
   2  -3  11   79.71    2.70 
  -2   3  11   71.73    2.86 
  -2  -3 -11   66.00    2.75 
   2   3 -11   79.87    2.71 
  -2  -3 -11   78.56    2.75 
  -2  -3 -11   76.22    2.65 
  -2  -3 -11   76.07    2.60 
  -2   3  11   76.62    2.67 
  -2  -3 -11   77.04    2.62 
  -2  -3  11   84.24    2.92 
  -2   3 -11   85.37    2.96 
   2   3  11   86.47    2.98 
  -2  -3  11   87.76    2.90 
  -2   3 -11   84.53    2.93 
  -2   3 -11   83.36    2.98 
  -3   3  11   17.10    0.92 
  -3   3  11   17.51    0.72 
  -3  -3 -11   16.83    0.70 
  -3   3  11   18.13    0.76 
  -3  -3 -11   17.39    0.71 
   3  -3  11   18.41    0.77 
  -3   3  11   18.50    0.76 
  -3  -3 -11   16.87    0.71 
  -3  -3 -11   17.32    0.68 
  -3  -3 -11   17.57    0.82 
   3   3 -11   16.50    0.77 
  -3  -3  11   15.61    0.60 
   3   3  11   15.05    0.65 
  -3   3 -11   14.78    0.65 
  -3  -3  11   15.31    0.61 
  -3   3 -11   14.52    0.62 
  -4   3  11    1.94    0.21 
  -4  -3 -11    1.81    0.19 
  -4   3  11    2.09    0.35 
  -4  -3 -11    1.73    0.19 
  -4  -3  11    3.73    0.23 
  -4   3 -11    3.58    0.25 
  -4   3 -11    3.67    0.37 
  -5   3  11   30.88    1.30 
  -5   3  11   31.34    1.18 
  -5  -3 -11   32.25    1.16 
  -5   3  11   29.85    1.16 
  -5   3  11   30.07    1.17 
  -5   3  11   30.42    1.23 
  -5   3 -11   27.29    1.21 
  -5   3 -11   29.49    1.11 
  -5   3 -11   29.95    1.08 
  -5   3 -11   29.63    1.19 
  -5  -3  11   29.12    1.05 
  -6   3  11   12.00    0.59 
  -6   3  11   12.81    0.54 
  -6   3  11   12.32    0.53 
  -6   3  11   12.62    0.66 
  -6   3 -11   13.21    0.55 
  -6   3 -11   12.91    0.53 
  -7   3  11   48.24    1.73 
  -7   3  11   47.11    1.76 
  -7   3  11   51.86    1.68 
  -7   3 -11   50.88    1.74 
   0  -4 -11    0.42    0.14 
   0  -4 -11    0.51    0.13 
   0  -4 -11    0.41    0.15 
   0  -4 -11    0.50    0.15 
  -1  -4 -11   17.53    0.72 
  -1   4  11   16.85    0.73 
  -1  -4 -11   17.70    0.67 
  -1  -4 -11   18.07    0.75 
  -1  -4 -11   16.78    0.70 
  -1  -4 -11   17.08    0.81 
  -1  -4 -11   17.02    0.70 
  -1  -4  11   16.22    0.63 
   1   4  11   16.71    0.73 
  -1   4 -11   16.06    0.73 
  -2  -4 -11   56.27    2.13 
  -2  -4 -11   57.86    1.99 
  -2   4  11   57.64    2.28 
  -2  -4 -11   55.01    1.97 
  -2  -4 -11   55.45    1.98 
  -2   4  11   56.64    2.05 
  -2  -4 -11   56.14    1.99 
  -2  -4 -11   55.75    2.02 
  -2   4 -11   53.05    1.91 
  -2   4 -11   53.33    1.85 
  -2  -4  11   51.74    1.81 
  -2  -4  11   51.87    1.81 
  -2   4 -11   50.66    1.88 
   2   4  11   51.13    1.90 
  -3   4  11   17.66    0.96 
  -3   4  11   17.59    0.71 
   3  -4  11   15.24    0.76 
  -3  -4 -11   16.52    0.69 
  -3  -4 -11   16.48    0.81 
  -3  -4 -11   16.90    0.69 
  -3  -4 -11   17.74    0.67 
   3   4 -11   14.33    0.75 
  -3   4  11   17.29    0.74 
  -3  -4  11   22.61    0.86 
  -3   4 -11   23.07    0.91 
  -3  -4  11   21.27    0.97 
  -4   4  11   54.22    2.01 
  -4  -4 -11   56.33    1.91 
  -4   4  11   55.33    2.22 
  -4   4  11   57.32    2.00 
  -4  -4 -11   52.11    1.96 
  -4  -4 -11   57.92    1.98 
  -4  -4 -11   54.62    1.95 
  -4   4 -11   62.31    2.37 
  -4   4 -11   64.12    2.22 
   4  -4 -11   61.81    2.78 
  -4   4 -11   61.58    2.25 
  -4   4 -11   62.26    2.36 
  -4  -4  11   62.39    2.17 
  -4   4 -11   57.04    2.29 
  -4   4 -11   63.12    2.18 
  -4  -4  11   65.43    2.22 
  -4   4 -11   66.57    2.24 
  -5   4  11  107.83    3.79 
  -5   4  11  109.68    3.78 
  -5   4  11  115.14    3.96 
  -5   4  11  107.17    3.79 
  -5  -4 -11  109.62    3.78 
  -5   4  11  113.54    3.85 
  -5   4 -11  110.52    3.62 
  -5   4 -11  104.79    3.76 
  -5   4 -11  106.72    3.66 
  -5  -4  11  103.86    3.58 
  -6  -4 -11   14.11    0.58 
  -6   4  11   14.29    0.58 
  -6   4  11   14.46    0.63 
  -6   4  11   14.87    0.59 
  -6   4  11   13.55    0.65 
  -6   4 -11   13.33    0.54 
  -6   4 -11   14.00    0.54 
  -6   4 -11   12.55    0.62 
   6  -4 -11   13.38    0.92 
   0  -5 -11    4.40    0.34 
   0  -5 -11    3.49    0.25 
   0  -5 -11    3.26    0.33 
   0  -5 -11    3.87    0.29 
  -1  -5 -11   35.90    1.52 
  -1  -5 -11   38.60    1.29 
  -1  -5 -11   38.50    1.46 
  -1  -5 -11   36.61    1.42 
  -1   5  11   38.66    1.44 
  -1  -5 -11   38.00    1.39 
   1   5 -11   38.40    1.43 
  -1  -5  11   40.62    1.43 
   1  -5 -11   38.77    1.45 
  -2   5  11  119.36    4.11 
  -2  -5 -11  118.94    4.04 
  -2  -5 -11  118.91    4.04 
  -2  -5 -11  115.23    4.07 
   2   5 -11  119.50    4.10 
  -2  -5 -11  118.31    4.04 
  -2  -5  11  104.02    3.45 
  -2   5 -11  102.38    3.51 
  -2   5 -11  102.34    3.57 
  -2  -5  11  100.73    3.48 
  -3   5  11   14.64    0.89 
  -3   5  11   15.14    0.66 
  -3  -5 -11   15.18    0.64 
  -3  -5 -11   14.94    0.61 
  -3  -5 -11   14.33    0.56 
   3   5 -11   15.82    0.70 
  -3   5  11   14.31    0.68 
  -3   5  11   15.28    0.66 
  -3  -5 -11   14.46    0.63 
  -3  -5 -11   15.70    0.65 
   3  -5  11   14.58    1.35 
  -3   5 -11   14.92    0.75 
  -3  -5  11   14.64    0.68 
   3  -5 -11   14.74    0.97 
  -3  -5  11   13.77    0.73 
  -3   5 -11   14.37    0.74 
  -3  -5  11   14.11    0.66 
  -3   5 -11   14.37    0.80 
  -3   5 -11   14.32    0.65 
  -4  -5 -11    5.66    0.31 
  -4  -5 -11    5.90    0.34 
  -4   5  11    6.11    0.56 
  -4   5  11    5.45    0.34 
  -4  -5 -11    5.70    0.27 
  -4   5 -11    2.41    0.23 
  -4   5 -11    2.34    0.26 
  -4   5 -11    2.08    0.20 
  -4   5 -11    2.14    0.31 
  -4   5 -11    2.30    0.23 
  -4  -5  11    2.38    0.19 
   4  -5 -11    2.48    0.53 
  -4  -5  11    2.38    0.25 
  -4  -5  11    1.98    0.18 
  -4   5 -11    2.27    0.31 
  -4   5 -11    2.31    0.29 
  -5   5  11    0.04    0.09 
  -5   5  11    0.14    0.12 
  -5  -5 -11    0.22    0.16 
  -5   5  11    0.20    0.11 
  -5   5 -11    0.21    0.15 
  -5   5 -11    0.25    0.14 
   5  -5 -11    0.32    0.26 
  -5   5 -11    0.18    0.16 
  -6   5  11   19.34    0.73 
  -6   5  11   19.38    0.74 
  -6   5 -11   19.40    0.78 
  -6   5 -11   19.69    0.70 
  -6   5 -11   18.62    0.71 
   6  -5 -11   18.97    0.97 
   0  -6  11    0.41    0.25 
   0  -6 -11    0.44    0.20 
   0  -6  11    0.26    0.13 
   0  -6 -11    0.31    0.17 
   0   6  11    0.69    0.39 
   0  -6 -11    0.40    0.33 
   0  -6 -11    0.54    0.14 
   0  -6 -11    0.59    0.18 
   0  -6  11    0.29    0.20 
   0   6 -11    0.53    0.26 
   0  -6 -11    0.30    0.17 
  -1   6  11   60.80    2.47 
  -1  -6 -11   59.29    2.24 
   1   6 -11   64.53    2.23 
  -1  -6 -11   62.69    2.32 
  -1  -6 -11   62.66    2.21 
  -1  -6 -11   61.95    2.26 
   1  -6  11   52.11    2.66 
  -1  -6 -11   63.72    2.25 
  -1   6  11   64.12    2.25 
   1   6 -11   63.46    2.57 
   1  -6  11   64.34    2.44 
   1  -6 -11   59.15    2.33 
  -1  -6  11   60.39    2.66 
  -1   6 -11   60.24    2.35 
  -1  -6  11   63.42    2.22 
  -1  -6  11   62.94    2.36 
   1  -6 -11   62.57    2.25 
  -1  -6  11   60.52    2.25 
   1  -6 -11   57.73    2.27 
  -1  -6  11   59.83    2.14 
  -1  -6  11   65.04    2.14 
   1  -6 -11   61.87    2.19 
  -2   6  11   91.57    3.22 
  -2  -6 -11   90.17    3.22 
  -2  -6 -11   88.28    3.16 
  -2  -6 -11   91.05    3.15 
   2  -6  11  100.20    3.63 
   2   6 -11   86.70    3.56 
  -2  -6 -11   84.66    3.21 
  -2  -6 -11   94.86    3.19 
  -2  -6 -11   91.35    3.16 
  -2  -6 -11   93.27    3.15 
  -2  -6  11   83.79    2.91 
  -2   6 -11   83.39    3.19 
  -2   6 -11   84.55    3.42 
  -2   6 -11   88.88    3.00 
  -2  -6  11   84.93    3.10 
  -2   6 -11   85.64    2.92 
  -2   6 -11   82.73    3.10 
   2  -6 -11   83.51    2.98 
  -2  -6  11   85.13    2.98 
  -3   6  11    1.10    0.37 
  -3   6  11    1.03    0.19 
  -3  -6 -11    0.87    0.16 
  -3   6  11    1.21    0.20 
  -3  -6 -11    1.26    0.18 
  -3   6  11    0.94    0.41 
  -3  -6 -11    1.00    0.19 
   3  -6  11    0.89    0.44 
  -3  -6 -11    0.92    0.27 
  -3  -6  11    0.92    0.16 
  -3   6 -11    1.06    0.27 
  -3  -6  11    0.79    0.20 
   3  -6 -11    0.78    0.30 
  -3   6 -11    0.91    0.19 
  -3   6 -11    0.99    0.34 
  -3  -6  11    1.20    0.25 
  -3   6 -11    1.15    0.24 
  -3  -6  11    0.95    0.21 
   3  -6 -11    0.92    0.50 
  -4  -6 -11   17.36    0.70 
  -4   6  11   18.15    0.73 
  -4  -6 -11   17.33    0.68 
   4  -6  11   17.75    1.07 
  -4  -6  11   15.68    0.67 
  -4   6 -11   16.27    0.74 
  -4   6 -11   15.78    0.62 
  -4   6 -11   16.41    0.67 
  -4   6 -11   15.34    1.02 
  -4   6 -11   15.59    0.72 
   4  -6 -11   15.89    0.87 
  -5   6  11    2.35    0.19 
  -5   6  11    2.32    0.18 
  -5   6  11    2.18    0.22 
  -5   6  11    2.15    0.17 
   5  -6  11    2.17    0.42 
  -5   6 -11    2.26    0.21 
  -5   6 -11    2.58    0.24 
   5  -6 -11    2.52    0.38 
  -5   6 -11    2.40    0.17 
   5  -6 -11    2.65    0.32 
   0  -7 -11   27.29    1.14 
   0  -7  11   29.20    1.19 
   0   7  11   28.40    1.38 
   0  -7  11   31.18    1.69 
   0  -7 -11   27.29    1.16 
   0  -7 -11   29.23    1.21 
   0  -7  11   26.14    1.21 
   0  -7 -11   28.18    1.09 
   0  -7  11   28.31    1.06 
   0  -7  11   27.17    1.09 
   0  -7  11   27.10    1.04 
  -1  -7 -11   18.39    0.83 
  -1  -7 -11   19.05    0.82 
  -1  -7 -11   17.34    0.77 
   1   7 -11   18.49    0.95 
  -1  -7 -11   18.27    0.76 
   1  -7  11   17.93    0.93 
  -1  -7 -11   17.85    0.79 
   1  -7 -11   17.00    0.69 
   1  -7 -11   16.52    1.01 
  -1  -7  11   17.68    0.68 
   1  -7 -11   17.83    0.83 
  -1  -7  11   18.17    0.87 
  -1  -7  11   15.98    0.72 
  -1   7 -11   17.35    0.84 
  -1  -7  11   16.80    0.73 
  -1  -7  11   16.03    0.60 
   1  -7 -11   16.92    0.76 
   1   7  11   17.16    1.05 
   1  -7 -11   16.57    0.72 
   1  -7 -11   15.94    0.79 
   2   7 -11   19.85    1.07 
   2  -7  11   19.04    0.95 
  -2  -7 -11   20.02    0.80 
  -2  -7 -11   20.51    0.80 
  -2  -7 -11   20.65    0.86 
  -2  -7 -11   19.09    0.74 
  -2  -7  11   17.28    0.81 
  -2  -7  11   16.86    0.73 
  -2   7 -11   17.11    0.74 
  -2   7 -11   16.06    0.96 
  -2  -7  11   16.94    0.74 
  -2   7 -11   18.00    0.91 
  -2   7 -11   16.91    0.82 
   2  -7 -11   17.61    0.83 
  -2   7 -11   17.08    0.65 
  -2  -7  11   16.11    0.71 
   3  -7  11   12.18    0.82 
   3   7 -11   14.46    0.87 
  -3   7  11   14.98    0.77 
  -3   7  11   13.95    0.68 
   3  -7  11   13.97    0.78 
  -3  -7 -11   15.25    0.59 
  -3   7 -11   10.54    0.60 
  -3  -7  11   10.51    0.53 
  -3   7 -11   10.72    0.44 
  -3  -7  11   11.06    0.51 
  -3   7 -11   10.75    0.52 
  -3  -7  11   10.57    0.46 
  -4   7  11    0.12    0.09 
  -4   7  11    0.22    0.08 
   4  -7  11    0.21    0.18 
  -4   7  11    0.13    0.09 
   4   7 -11    0.38    0.25 
  -4   7  11    0.30    0.14 
  -4   7 -11    0.04    0.11 
  -4   7 -11    0.08    0.08 
  -4  -7  11    0.05    0.08 
  -4   7 -11    0.26    0.14 
  -4   7 -11    0.21    0.12 
   0  -8 -11   20.95    0.80 
   0  -8 -11   20.21    0.82 
   0  -8  11   20.36    0.91 
   0  -8 -11   19.73    0.83 
   0   8  11   21.29    1.01 
   0  -8 -11   20.42    0.87 
  -1  -8 -11    3.40    0.24 
   1  -8  11    2.60    0.38 
   1  -8  11    3.17    0.28 
   1  -8  11    3.94    0.53 
  -1  -8 -11    3.67    0.27 
  -1  -8 -11    3.09    0.27 
  -1  -8 -11    3.49    0.23 
  -1  -8  11    3.04    0.25 
   1  -8 -11    3.05    0.23 
   1  -8 -11    3.22    0.31 
  -1   8 -11    2.69    0.49 
  -1   8 -11    2.89    0.29 
  -1  -8  11    3.94    0.32 
   1   8  11    3.02    0.37 
  -1  -8  11    2.90    0.30 
   1  -8 -11    3.22    0.26 
  -2   8  11   11.21    0.72 
  -2  -8 -11   11.32    0.46 
   2   8 -11   10.27    0.61 
  -2  -8 -11   10.50    0.50 
  -2  -8  11   12.07    0.52 
  -2   8 -11   12.47    0.60 
  -2  -8  11   12.97    0.54 
  -2  -8  11   12.01    0.57 
   2   8  11   11.89    0.74 
   2  -8 -11   12.49    0.60 
  -3   8  11   13.20    0.65 
   3   8 -11   11.78    0.63 
  -3   8 -11    9.34    0.43 
  -3   8 -11   10.17    0.46 
  -3   8 -11    8.43    0.47 
  -3   8 -11   10.23    0.38 
   3  -8 -11    8.99    0.57 
  -3  -8  11   10.09    0.42 
   0   0 -12   10.67    0.51 
   0   0 -12   11.41    0.57 
   0   0 -12   11.55    0.54 
   0   0 -12   10.80    0.51 
   0   0  12   11.15    0.44 
  -1   0 -12    2.05    0.18 
  -1   0 -12    1.97    0.19 
   1   0  12    2.35    0.19 
  -1   0 -12    2.31    0.24 
  -1   0 -12    2.05    0.22 
   1   0 -12    2.03    0.23 
  -1   0  12    1.98    0.14 
  -2   0 -12   57.40    1.95 
   2   0  12   57.50    2.04 
  -2   0  12   57.02    2.04 
  -2   0 -12   56.96    2.14 
  -2   0 -12   58.08    2.04 
  -2   0 -12   59.04    2.12 
  -2   0 -12   55.79    2.01 
  -2   0 -12   56.12    2.13 
  -2   0  12   59.70    1.99 
  -3   0  12   24.69    0.88 
  -3   0  12   22.44    0.91 
  -3   0 -12   23.52    0.85 
  -3   0  12   23.90    0.87 
  -3   0 -12   23.27    0.99 
   3   0 -12   22.81    0.98 
  -3   0 -12   24.17    0.91 
  -3   0 -12   22.79    1.03 
   3   0  12   23.74    0.93 
   4   0  12   61.21    2.21 
  -4   0  12   64.81    2.18 
   4   0 -12   61.98    2.30 
  -4   0 -12   61.75    2.33 
  -4   0  12   63.18    2.16 
  -5   0 -12    4.36    0.28 
  -5   0  12    4.97    0.37 
  -5   0 -12    4.96    0.38 
  -5   0  12    4.89    0.41 
  -5   0  12    4.62    0.26 
  -5   0  12    4.26    0.27 
  -5   0 -12    4.30    0.26 
  -5   0  12    4.41    0.38 
  -6   0  12    6.15    0.29 
  -6   0  12    6.45    0.42 
  -6   0 -12    6.39    0.42 
  -6   0  12    6.27    0.44 
  -6   0 -12    6.36    0.33 
  -6   0  12    6.26    0.40 
  -7   0  12   27.40    1.08 
  -7   0  12   27.68    0.95 
  -7   0 -12   27.44    0.98 
  -7   0  12   26.10    1.05 
   0  -1 -12   80.76    2.89 
   0  -1 -12   79.41    2.84 
   0  -1 -12   81.90    2.93 
   0  -1 -12   79.65    2.78 
   0  -1  12   83.78    2.76 
   0  -1 -12   82.22    2.85 
   0   1 -12   80.92    2.87 
   0   1  12   84.69    2.77 
  -1  -1 -12   39.56    1.70 
  -1  -1 -12   49.82    1.64 
  -1  -1 -12   43.02    1.65 
  -1   1  12   43.77    1.49 
  -1  -1 -12   39.96    1.52 
   1  -1  12   41.35    1.55 
  -1  -1 -12   42.74    1.51 
  -1  -1 -12   42.86    1.62 
  -1  -1 -12   43.13    1.55 
  -1   1  12   42.41    1.53 
   1  -1 -12   32.86    1.39 
  -1  -1  12   34.07    1.32 
  -1   1 -12   35.97    1.37 
  -1   1 -12   36.06    1.31 
   1   1  12   35.93    1.32 
  -1  -1  12   37.63    1.25 
  -1   1 -12   35.58    1.31 
  -2   1  12   64.27    2.18 
  -2   1  12   62.77    2.23 
  -2  -1 -12   63.39    2.34 
  -2  -1 -12   63.61    2.20 
  -2  -1 -12   66.18    2.24 
   2  -1  12   62.70    2.24 
  -2  -1 -12   62.66    2.34 
  -2   1  12   61.60    2.23 
  -2  -1 -12   63.65    2.20 
  -2  -1 -12   62.08    2.18 
  -2  -1 -12   63.70    2.32 
  -2  -1  12   66.97    2.29 
  -2   1 -12   65.11    2.44 
  -2   1 -12   64.78    2.28 
  -2  -1  12   63.19    2.33 
  -2   1 -12   67.00    2.44 
  -2   1 -12   70.07    2.34 
  -2   1 -12   66.25    2.35 
   2   1  12   66.54    2.35 
  -2   1 -12   71.32    2.34 
  -3   1  12   43.55    1.50 
  -3  -1 -12   43.49    1.50 
  -3  -1 -12   41.68    1.65 
  -3  -1 -12   41.85    1.51 
  -3   1  12   41.55    1.48 
   3   1 -12   40.67    1.59 
   3  -1  12   41.42    1.54 
  -3   1  12   40.40    1.53 
  -3  -1 -12   42.84    1.64 
  -3   1 -12   36.71    1.33 
  -3  -1  12   37.49    1.32 
  -3   1 -12   36.78    1.48 
  -3   1 -12   38.47    1.38 
   3   1  12   38.04    1.39 
  -3  -1  12   37.28    1.33 
   3  -1 -12   36.97    1.46 
   4  -1  12    2.80    0.24 
  -4   1  12    2.66    0.23 
  -4  -1 -12    2.76    0.21 
   4   1 -12    2.90    0.28 
  -4  -1 -12    2.74    0.30 
  -4   1  12    2.51    0.19 
  -4   1 -12    4.27    0.36 
  -4  -1  12    4.07    0.25 
   4   1  12    3.83    0.26 
  -4  -1  12    3.97    0.23 
   4  -1 -12    3.94    0.33 
  -5   1  12    5.19    0.29 
  -5  -1 -12    6.19    0.42 
  -5   1  12    5.29    0.32 
  -5   1  12    5.85    0.39 
  -5   1  12    5.65    0.39 
  -5   1  12    5.84    0.46 
  -5  -1 -12    5.26    0.28 
  -5   1  12    5.02    0.33 
  -5  -1  12    9.07    0.52 
  -5  -1  12    8.95    0.40 
  -5   1 -12    9.03    0.53 
  -5   1 -12    8.35    0.41 
  -5   1 -12    7.78    0.41 
  -5  -1  12    9.21    0.39 
  -6   1  12   22.68    0.97 
  -6   1  12   24.35    1.04 
  -6   1  12   24.15    0.98 
  -6   1  12   22.28    0.94 
  -6  -1 -12   24.15    0.88 
  -6  -1 -12   22.01    0.98 
  -6   1  12   23.99    0.90 
  -6  -1  12   20.63    0.90 
  -6   1 -12   21.62    0.81 
  -6   1 -12   20.34    0.90 
  -7   1  12   28.07    1.11 
  -7   1  12   30.09    1.13 
  -7   1  12   30.92    1.17 
  -7   1  12   30.15    1.04 
  -7  -1  12   34.98    1.20 
  -7   1 -12   32.59    1.18 
  -7  -1  12   33.30    1.26 
   0  -2 -12   11.90    0.55 
   0  -2 -12   12.41    0.51 
   0  -2 -12   12.62    0.65 
   0  -2 -12   12.25    0.60 
   0  -2  12   12.38    0.48 
   0  -2 -12   12.93    0.57 
   0  -2 -12   12.01    0.57 
  -1  -2 -12   26.96    1.00 
   1   2 -12   25.28    1.14 
  -1  -2 -12   26.82    1.14 
  -1  -2 -12   27.53    1.06 
  -1  -2 -12   27.32    1.15 
  -1  -2 -12   27.23    1.01 
  -1  -2 -12   26.98    1.03 
  -1  -2 -12   28.09    1.12 
  -1   2  12   27.39    1.03 
  -1  -2  12   28.31    0.99 
  -1   2 -12   26.56    1.06 
   1   2  12   26.94    1.06 
  -1   2 -12   27.97    1.06 
  -2  -2 -12   11.03    0.57 
  -2  -2 -12   10.32    0.50 
  -2  -2 -12   10.51    0.59 
  -2  -2 -12   11.11    0.47 
  -2   2  12   10.31    0.67 
  -2  -2 -12   10.37    0.46 
  -2  -2 -12   10.28    0.58 
  -2  -2 -12   10.66    0.46 
   2  -2  12   11.30    0.52 
  -2   2  12   10.44    0.45 
  -2   2  12   10.25    0.49 
  -2   2 -12   11.66    0.49 
  -2   2 -12   11.62    0.60 
  -2  -2  12   12.16    0.48 
  -2   2 -12   11.78    0.55 
   2   2  12   11.68    0.54 
  -2   2 -12   11.24    0.52 
   3   2 -12   34.02    1.31 
   3  -2  12   33.12    1.26 
  -3  -2 -12   33.35    1.19 
  -3  -2 -12   32.57    1.35 
  -3  -2 -12   31.87    1.21 
  -3   2  12   33.17    1.19 
  -3   2  12   32.65    1.21 
  -3   2  12   31.48    1.24 
  -3  -2 -12   31.72    1.21 
  -3   2  12   32.96    1.26 
  -3  -2 -12   33.28    1.22 
  -3  -2 -12   33.78    1.34 
   3   2  12   31.19    1.13 
  -3   2 -12   28.87    1.20 
  -3  -2  12   27.43    1.02 
  -3   2 -12   28.71    1.12 
  -3   2 -12   29.42    1.07 
  -3  -2  12   29.68    1.07 
  -4  -2 -12  102.61    3.50 
  -4  -2 -12   99.76    3.64 
  -4  -2 -12  103.82    3.50 
  -4   2 -12   88.73    3.15 
  -4   2 -12   86.46    3.02 
  -4  -2  12   87.81    3.00 
  -5   2  12   43.18    1.57 
  -5   2  12   45.12    1.69 
  -5   2  12   43.86    1.61 
  -5  -2 -12   42.91    1.54 
  -5   2  12   43.76    1.60 
  -5   2  12   46.89    1.78 
  -5   2 -12   46.30    1.79 
  -5   2 -12   45.71    1.65 
  -5   2 -12   47.43    1.69 
  -5  -2  12   47.42    1.64 
  -5  -2  12   45.95    1.61 
  -5  -2  12   47.38    1.79 
  -6   2  12   11.61    0.57 
  -6   2  12   10.78    0.49 
  -6   2  12   10.67    0.60 
  -6  -2  12   11.67    0.57 
  -6   2 -12   10.77    0.44 
  -6   2 -12   10.80    0.55 
  -6   2 -12   10.55    0.47 
  -7   2  12   24.31    0.85 
  -7   2  12   24.24    0.96 
  -7   2  12   23.00    0.90 
  -7  -2  12   24.27    0.94 
  -7   2 -12   24.67    0.87 
   0  -3 -12   78.57    2.76 
   0  -3 -12   84.10    2.72 
   0  -3  12   69.70    2.67 
   0  -3 -12   78.93    2.83 
   0  -3 -12   83.13    2.79 
   0  -3 -12   77.30    2.88 
  -1  -3 -12    2.05    0.19 
  -1  -3 -12    2.11    0.26 
  -1  -3 -12    2.89    0.24 
  -1  -3 -12    1.87    0.19 
  -1   3  12    1.79    0.17 
  -1  -3 -12    2.11    0.19 
  -1  -3 -12    2.18    0.27 
  -1   3 -12    3.03    0.26 
  -1  -3  12    3.39    0.19 
  -1   3 -12    2.94    0.27 
   1   3  12    3.09    0.25 
  -2  -3 -12  113.68    4.00 
  -2   3  12  117.86    4.25 
   2  -3  12  118.73    4.05 
  -2  -3 -12  112.87    3.96 
  -2  -3 -12  121.44    4.13 
  -2  -3 -12  113.58    3.95 
  -2   3  12  117.79    4.02 
  -2  -3 -12  114.66    3.97 
  -2  -3 -12  118.51    3.96 
  -2   3 -12  106.06    3.64 
  -2   3 -12  107.60    3.67 
  -2  -3  12  105.72    3.60 
   2   3  12  104.47    3.65 
  -2   3 -12  103.53    3.59 
  -2  -3  12  106.07    3.58 
  -3  -3 -12  171.70    5.87 
  -3   3  12  175.48    5.85 
  -3   3  12  179.25    6.16 
  -3  -3 -12  168.67    5.86 
  -3  -3 -12  169.13    5.87 
  -3   3  12  174.81    5.88 
  -3  -3 -12  179.49    5.84 
   3   3 -12  177.39    5.97 
  -3   3  12  177.02    5.92 
   3  -3  12  167.13    5.94 
  -3   3 -12  171.14    5.91 
  -3  -3  12  179.42    5.86 
   3   3  12  173.25    5.92 
  -4  -3 -12   17.77    0.71 
  -4   3  12   17.42    0.74 
  -4   3  12   17.27    0.73 
  -4  -3 -12   16.81    0.70 
  -4   3  12   17.55    0.85 
  -4  -3 -12   16.55    0.68 
  -4   3  12   16.65    0.77 
  -4   3 -12   17.70    0.87 
  -4  -3  12   17.18    0.77 
  -4  -3  12   17.78    0.83 
  -4  -3  12   17.85    0.71 
  -4   3 -12   19.88    0.74 
  -4   3 -12   18.02    0.75 
  -4   3 -12   18.60    0.79 
  -4  -3  12   17.27    0.75 
  -4   3 -12   18.35    0.72 
  -5   3  12    4.66    0.32 
  -5   3  12    5.16    0.37 
  -5   3  12    4.50    0.31 
  -5  -3 -12    5.03    0.30 
  -5   3  12    5.06    0.31 
  -5   3  12    4.39    0.40 
  -5   3 -12    3.80    0.32 
  -5   3 -12    3.86    0.29 
  -5   3 -12    3.25    0.33 
  -5   3 -12    3.56    0.24 
  -5  -3  12    3.49    0.22 
  -6   3  12   11.57    0.50 
  -6   3  12   12.27    0.52 
  -6   3  12   11.85    0.62 
  -6   3  12   11.36    0.56 
  -6   3 -12   10.48    0.44 
  -6   3 -12    9.93    0.43 
   0  -4 -12    0.52    0.13 
   0  -4 -12    0.74    0.15 
   0  -4 -12    0.54    0.18 
   0  -4 -12    0.56    0.18 
   0  -4 -12    0.59    0.19 
  -1  -4 -12   77.61    2.61 
  -1  -4 -12   74.66    2.66 
  -1  -4 -12   76.13    2.80 
  -1  -4 -12   80.02    2.67 
  -1  -4 -12   74.23    2.68 
  -1  -4 -12   76.03    2.72 
  -1   4  12   77.35    2.71 
  -1   4 -12   69.86    2.49 
   1   4  12   68.46    2.49 
  -1  -4  12   69.21    2.38 
  -2  -4 -12    2.37    0.21 
  -2  -4 -12    2.53    0.21 
  -2  -4 -12    2.63    0.25 
  -2  -4 -12    2.39    0.29 
  -2   4  12    2.77    0.44 
  -2   4  12    3.06    0.26 
  -2  -4 -12    2.94    0.22 
  -2  -4  12    1.72    0.19 
  -2   4 -12    1.33    0.21 
  -2   4 -12    1.32    0.19 
  -2  -4  12    1.67    0.15 
   2   4  12    1.55    0.20 
  -3  -4 -12   96.41    3.42 
  -3  -4 -12   93.67    3.32 
  -3   4  12   98.82    3.39 
  -3   4  12   92.58    3.35 
  -3  -4 -12   99.80    3.31 
  -3   4  12   94.90    3.34 
  -3   4  12   94.77    3.48 
  -3   4  12   97.67    3.64 
  -3  -4 -12   97.74    3.33 
  -3  -4 -12  102.51    3.35 
  -3  -4 -12   94.64    3.27 
  -3  -4  12   88.39    3.39 
  -3  -4  12   96.06    3.40 
   3  -4 -12   95.99    3.87 
  -3  -4  12   95.52    3.50 
  -3   4 -12  105.99    3.34 
  -3   4 -12   97.53    3.50 
  -3   4 -12   94.59    3.48 
  -3   4 -12  101.06    3.42 
  -3   4 -12   97.79    3.37 
  -4   4  12    1.28    0.20 
  -4  -4 -12    1.40    0.20 
  -4  -4 -12    1.54    0.18 
  -4   4  12    1.37    0.20 
  -4   4 -12    1.74    0.24 
  -4   4 -12    1.70    0.19 
  -4  -4  12    1.82    0.22 
  -4  -4  12    1.92    0.21 
  -4   4 -12    2.06    0.32 
  -4   4 -12    2.46    0.31 
   4  -4 -12    1.65    0.50 
  -4   4 -12    1.94    0.22 
  -4   4 -12    1.91    0.28 
  -4  -4  12    1.71    0.17 
  -4   4 -12    2.00    0.21 
  -5   4  12    6.07    0.34 
  -5   4  12    6.26    0.36 
  -5   4  12    6.30    0.45 
  -5   4  12    6.45    0.40 
  -5   4  12    6.53    0.40 
  -5  -4 -12    5.55    0.33 
  -5   4 -12    4.86    0.28 
  -5   4 -12    4.76    0.38 
  -5   4 -12    5.03    0.32 
   5  -4 -12    5.31    0.63 
  -6   4  12    2.09    0.25 
  -6   4  12    2.04    0.22 
  -6   4  12    2.11    0.19 
  -6   4  12    2.11    0.18 
  -6   4 -12    1.54    0.21 
  -6   4 -12    1.70    0.16 
   6  -4 -12    1.54    0.38 
  -6   4 -12    1.45    0.14 
   0  -5 -12   45.69    1.64 
   0  -5 -12   43.92    1.64 
   0  -5 -12   46.46    1.73 
  -1   5  12   48.53    1.81 
   1   5 -12   49.20    1.79 
  -1  -5 -12   49.20    1.75 
   1   5 -12   47.99    2.71 
  -1  -5 -12   49.30    1.76 
  -1  -5 -12   48.67    1.82 
   1  -5 -12   50.05    1.80 
   2   5 -12   66.78    2.40 
  -2   5  12   69.62    2.42 
  -2  -5 -12   66.40    2.36 
  -2  -5 -12   66.17    2.44 
   2  -5  12   65.75    2.85 
  -2  -5 -12   67.58    2.34 
   2   5 -12   66.09    2.84 
  -2  -5 -12   68.75    2.39 
  -2  -5 -12   66.66    2.43 
  -2  -5 -12   66.06    2.38 
  -2  -5 -12   65.70    2.37 
  -2  -5 -12   67.58    2.35 
  -2  -5  12   76.38    2.89 
  -2  -5  12   78.94    2.61 
  -2   5 -12   74.55    2.82 
  -2   5 -12   77.93    2.67 
   2  -5 -12   78.62    2.97 
  -2   5 -12   73.29    2.85 
  -2  -5  12   76.54    2.86 
  -2  -5  12   73.74    2.74 
  -2   5 -12   82.34    3.22 
  -2   5 -12   79.22    2.75 
  -3  -5 -12   28.11    1.06 
  -3   5  12   27.26    1.33 
  -3   5  12   27.10    1.10 
   3   5 -12   27.52    1.11 
  -3   5  12   28.57    1.08 
  -3   5  12   27.46    1.06 
  -3  -5 -12   26.87    1.11 
  -3  -5 -12   27.60    1.03 
  -3  -5 -12   27.16    1.05 
  -3   5  12   28.12    1.56 
   3  -5  12   27.61    1.54 
  -3   5 -12   21.83    1.00 
  -3   5 -12   24.31    1.10 
  -3   5 -12   21.94    1.01 
  -3   5 -12   21.70    0.84 
  -3  -5  12   21.49    0.99 
   3  -5 -12   21.79    1.19 
  -3  -5  12   22.84    0.94 
  -3   5 -12   22.35    0.91 
  -3  -5  12   23.61    0.95 
  -4  -5 -12   12.88    0.55 
  -4   5  12   13.67    0.59 
  -4   5  12   13.82    0.82 
  -4  -5 -12   12.96    0.58 
  -4   5 -12   13.13    0.67 
   4  -5 -12   13.44    0.89 
  -4   5 -12   12.87    0.53 
  -4   5 -12   12.80    0.57 
  -4   5 -12   13.13    0.60 
  -4   5 -12   11.88    0.68 
  -4  -5  12   12.75    0.53 
  -4   5 -12   12.16    0.63 
  -4  -5  12   12.45    0.52 
  -4   5 -12   14.04    0.58 
  -4  -5  12   12.80    0.58 
  -5  -5 -12    4.49    0.28 
  -5   5  12    4.82    0.29 
  -5   5  12    4.60    0.28 
  -5   5 -12    5.55    0.37 
  -5   5 -12    5.28    0.31 
   5  -5 -12    4.80    0.52 
  -5   5 -12    4.86    0.27 
  -6   5  12    9.86    0.45 
   6  -5 -12   11.50    0.62 
  -6   5 -12   10.93    0.43 
   0  -6  12   23.71    1.12 
   0  -6 -12   25.01    0.98 
   0  -6 -12   23.25    1.16 
   0   6  12   24.82    1.34 
   0  -6  12   24.22    0.91 
   0  -6  12   24.99    1.17 
   0  -6 -12   24.91    1.03 
   0  -6 -12   24.71    1.09 
   0  -6  12   23.73    0.98 
   0  -6 -12   23.59    0.90 
   0  -6 -12   24.59    1.04 
  -1  -6 -12   25.81    1.11 
  -1  -6 -12   28.04    1.07 
  -1  -6 -12   25.91    1.01 
  -1  -6 -12   25.91    1.07 
   1  -6  12   26.14    1.18 
   1   6 -12   25.09    1.06 
   1   6 -12   24.34    1.26 
  -1  -6 -12   26.09    1.05 
  -1   6  12   25.49    1.21 
  -1   6  12   23.44    1.09 
  -1   6 -12   30.07    1.30 
   1  -6 -12   29.65    1.15 
  -1  -6  12   30.24    1.32 
  -1  -6  12   30.05    1.10 
  -1  -6  12   30.57    1.18 
   1  -6 -12   29.96    1.20 
   1   6  12   26.90    1.70 
  -1  -6  12   31.14    1.20 
   1  -6 -12   30.27    1.24 
  -1  -6  12   30.04    1.10 
  -1  -6  12   29.48    1.53 
   1  -6 -12   30.51    1.30 
  -2  -6 -12   12.69    0.58 
  -2  -6 -12   12.64    0.58 
  -2  -6 -12   12.12    0.61 
  -2  -6 -12   11.45    0.55 
  -2  -6 -12   12.73    0.63 
  -2  -6 -12   13.34    0.56 
   2  -6  12   12.12    0.86 
  -2  -6 -12   13.17    0.57 
   2   6 -12   12.67    0.89 
  -2   6 -12   17.06    0.95 
  -2   6 -12   18.30    0.73 
  -2  -6  12   18.91    0.91 
  -2   6 -12   18.15    0.90 
  -2   6 -12   20.83    1.17 
  -2   6 -12   18.10    0.80 
  -2  -6  12   18.52    0.80 
  -3   6  12    1.21    0.35 
  -3  -6 -12    1.34    0.19 
   3   6 -12    1.28    0.39 
   3  -6  12    1.43    0.44 
  -3   6  12    1.61    0.20 
  -3   6  12    1.17    0.18 
  -3  -6 -12    1.25    0.19 
  -3   6  12    1.57    0.38 
  -3  -6 -12    1.17    0.26 
  -3   6 -12    1.41    0.34 
  -3   6 -12    0.90    0.15 
  -3   6 -12    1.03    0.27 
  -3   6 -12    0.90    0.18 
  -3  -6  12    1.04    0.22 
  -3  -6  12    1.04    0.21 
  -3  -6  12    0.88    0.24 
   3  -6 -12    1.15    0.26 
  -3   6 -12    1.26    0.21 
  -3   6 -12    1.06    0.24 
  -4   6  12   57.89    1.96 
  -4  -6 -12   53.67    1.94 
   4  -6  12   55.47    2.33 
  -4  -6 -12   55.79    1.92 
  -4   6 -12   61.64    2.15 
   4  -6 -12   61.53    2.33 
  -4   6 -12   65.52    2.24 
  -4  -6  12   61.59    2.17 
  -4   6 -12   59.90    2.12 
  -4   6 -12   61.60    2.24 
  -5   6  12    9.52    0.43 
  -5   6  12    8.64    0.38 
   5  -6  12    8.69    0.60 
  -5   6  12    8.46    0.37 
  -5   6 -12    9.71    0.38 
   5  -6 -12    9.47    0.49 
  -5   6 -12    9.62    0.47 
  -5   6 -12    9.67    0.42 
  -5   6 -12    8.89    0.41 
   0  -7  12    6.69    0.68 
   0  -7  12    6.86    0.35 
   0  -7  12    6.76    0.42 
   0   7  12    6.18    0.55 
   0  -7 -12    6.76    0.46 
   0  -7 -12    6.46    0.37 
   0  -7  12    6.44    0.43 
   0  -7 -12    6.29    0.42 
   0  -7 -12    6.22    0.42 
   0  -7  12    6.02    0.49 
  -1  -7 -12   36.75    1.38 
  -1  -7 -12   31.76    1.34 
  -1  -7 -12   35.11    1.33 
   1   7 -12   39.52    1.51 
  -1  -7 -12   36.21    1.32 
  -1  -7 -12   36.33    1.40 
   1  -7  12   32.81    1.47 
   1  -7 -12   32.37    1.49 
   1   7  12   36.42    1.65 
  -1   7 -12   34.98    1.42 
  -1  -7  12   35.01    1.43 
   1  -7 -12   35.65    1.40 
   1  -7 -12   35.67    1.34 
  -1  -7  12   35.95    1.31 
   1  -7 -12   33.83    1.29 
  -1  -7  12   30.79    1.29 
   1  -7 -12   35.91    1.25 
  -2  -7 -12   40.68    1.52 
  -2  -7 -12   38.82    1.40 
   2   7 -12   40.82    1.72 
  -2  -7 -12   40.60    1.47 
  -2  -7 -12   41.97    1.47 
  -2  -7  12   36.58    1.39 
   2  -7 -12   36.77    1.46 
  -2  -7  12   34.83    1.45 
  -2   7 -12   36.36    1.47 
   2   7  12   39.39    1.79 
  -2  -7  12   36.15    1.37 
   2  -7 -12   38.46    1.89 
  -3   7  12   20.53    0.87 
   3  -7  12   19.74    0.93 
  -3  -7 -12   20.80    0.87 
   3   7 -12   20.61    1.04 
  -3  -7 -12   21.49    0.78 
  -3  -7  12   26.27    0.96 
  -3  -7  12   26.46    1.01 
  -3  -7  12   26.70    1.04 
  -3   7 -12   26.72    1.03 
  -3   7 -12   27.12    1.09 
  -3   7 -12   27.03    0.96 
  -4   7  12    6.58    0.36 
   4  -7  12    6.08    0.41 
  -4   7  12    6.82    0.33 
   4   7 -12    6.32    0.49 
  -4   7 -12    8.61    0.34 
  -4   7 -12    7.54    0.47 
  -4  -7  12    8.16    0.39 
  -4   7 -12    8.64    0.41 
  -4   7 -12    8.66    0.39 
   0  -8 -12    9.76    0.44 
   0  -8 -12    9.37    0.44 
   0  -8  12    9.04    0.52 
   0  -8 -12    8.88    0.45 
   0  -8 -12    9.43    0.48 
  -1  -8 -12   18.42    0.66 
  -1  -8 -12   17.74    0.72 
  -1  -8 -12   18.44    0.70 
  -1  -8 -12   17.68    0.72 
   1  -8  12   17.46    1.00 
  -1  -8  12   24.14    0.94 
   1  -8 -12   21.97    0.91 
   1  -8 -12   22.68    0.86 
   1   8  12   23.56    1.00 
  -1  -8  12   21.45    0.87 
  -1   8 -12   21.29    0.91 
  -1  -8  12   20.89    0.83 
   1  -8 -12   21.29    0.83 
   2  -8  12   16.53    1.07 
  -2  -8 -12   15.41    0.62 
   2  -8  12   15.50    0.65 
  -2   8  12   14.25    0.75 
  -2  -8 -12   14.84    0.59 
  -2  -8  12   15.44    0.62 
   2  -8 -12   14.97    0.68 
  -2   8 -12   16.15    0.70 
  -2   8 -12   15.84    0.58 
  -2  -8  12   16.39    0.67 
   2   8  12   15.94    0.80 
  -2  -8  12   15.80    0.61 
   0   0 -13    0.03    0.10 
   0   0 -13    0.00    0.10 
   0   0  13   -0.04    0.06 
   0   0 -13    0.68    0.15 
   0   0 -13    0.95    0.18 
   0   0 -13   -0.01    0.09 
  -1   0 -13    0.47    0.15 
   1   0  13    0.33    0.12 
  -1   0 -13    0.53    0.13 
  -1   0 -13    0.30    0.14 
  -1   0  13    0.40    0.09 
  -1   0 -13    0.36    0.12 
  -1   0 -13    0.52    0.15 
  -2   0 -13    1.98    0.24 
   2   0  13    2.09    0.21 
  -2   0 -13    2.33    0.24 
  -2   0 -13    2.00    0.18 
  -2   0  13    2.06    0.21 
  -2   0 -13    1.92    0.21 
  -2   0 -13    2.31    0.14 
  -2   0  13    1.93    0.16 
  -3   0  13   23.65    0.91 
  -3   0  13   24.56    0.95 
   3   0  13   25.33    0.97 
  -3   0 -13   23.53    1.04 
  -3   0 -13   24.29    0.89 
  -3   0 -13   24.29    0.94 
  -3   0  13   24.91    0.91 
  -3   0 -13   24.11    1.08 
   3   0 -13   23.60    1.02 
  -4   0 -13  112.35    3.96 
  -4   0  13  110.54    3.80 
  -5   0  13   49.85    1.83 
  -5   0  13   50.78    1.92 
  -5   0  13   49.18    1.78 
  -5   0  13   50.72    1.97 
  -5   0  13   51.96    1.92 
  -5   0  13   51.78    1.80 
  -5   0 -13   50.98    1.94 
  -5   0 -13   51.86    1.79 
  -6   0  13   16.06    0.75 
  -6   0 -13   16.61    0.65 
  -6   0  13   16.62    0.78 
  -6   0  13   17.39    0.73 
  -6   0 -13   16.21    0.76 
  -7   0  13   10.22    0.40 
  -7   0  13   10.54    0.51 
  -7   0  13   11.10    0.50 
   0  -1 -13  119.46    4.02 
   0  -1 -13  113.67    3.96 
   0   1 -13  118.77    4.05 
   0  -1  13  120.95    3.94 
   0   1 -13  109.50    4.08 
   0   1 -13  120.52    4.11 
   0   1  13  120.00    3.94 
   0  -1 -13  117.79    4.04 
   0  -1 -13  117.81    4.08 
   0  -1 -13  112.68    4.12 
  -1  -1 -13   29.66    1.26 
  -1  -1 -13   29.82    1.25 
  -1   1  13   30.73    1.13 
  -1  -1 -13   31.08    1.10 
  -1  -1 -13   29.10    1.16 
  -1  -1 -13   30.51    1.23 
  -1  -1 -13   29.82    1.15 
   1  -1  13   32.26    1.25 
  -1   1  13   29.83    1.09 
  -1  -1 -13   29.96    1.11 
  -1   1 -13   27.55    1.06 
  -1   1 -13   26.65    1.12 
  -1   1 -13   27.07    1.04 
   1   1  13   26.12    1.05 
  -1  -1  13   26.94    0.97 
   2  -1  13   14.07    0.63 
  -2   1  13   13.78    0.63 
  -2  -1 -13   14.72    0.60 
  -2   1  13   15.00    0.58 
  -2  -1 -13   14.85    0.58 
  -2  -1 -13   14.14    0.63 
  -2  -1 -13   14.26    0.71 
  -2  -1 -13   14.30    0.72 
  -2   1 -13   10.74    0.51 
  -2   1 -13   10.37    0.58 
  -2   1 -13   10.33    0.44 
  -2  -1  13   10.82    0.45 
   2   1  13   11.20    0.52 
  -2  -1  13   10.86    0.51 
  -2   1 -13   10.94    0.50 
  -3   1  13   41.46    1.55 
   3  -1  13   42.41    1.57 
  -3  -1 -13   42.87    1.68 
   3   1 -13   39.92    1.61 
  -3  -1 -13   44.21    1.51 
  -3   1  13   41.49    1.51 
  -3  -1 -13   41.35    1.65 
  -3   1  13   42.95    1.50 
  -3  -1 -13   42.44    1.53 
  -3  -1  13   53.90    1.84 
  -3  -1  13   54.13    1.86 
  -3   1 -13   52.97    1.85 
  -3   1 -13   50.68    1.90 
  -3   1 -13   53.79    2.03 
  -4   1  13    0.77    0.31 
  -4   1  13    2.10    0.31 
  -4   1  13    1.11    0.42 
  -4   1  13    2.36    0.28 
  -4  -1 -13    1.94    0.29 
  -4  -1 -13    1.66    0.18 
  -4   1 -13    2.30    0.28 
  -4  -1  13    1.60    0.33 
  -4  -1  13    3.60    0.44 
  -4  -1  13    2.25    0.20 
  -4  -1  13    1.51    0.40 
  -5   1  13    1.84    0.25 
  -5   1  13    2.13    0.26 
  -5   1  13    2.15    0.22 
  -5  -1 -13    2.10    0.26 
  -5   1  13    1.77    0.31 
  -5   1  13    1.84    0.21 
  -5  -1 -13    2.11    0.17 
  -5   1  13    2.06    0.19 
  -5  -1  13    4.18    0.24 
  -5   1 -13    3.91    0.34 
  -5  -1  13    3.82    0.24 
  -5  -1  13    4.09    0.35 
  -5   1 -13    3.66    0.25 
  -5   1 -13    4.28    0.27 
  -5  -1  13    3.18    0.38 
  -6   1  13   37.15    1.42 
  -6   1  13   36.57    1.34 
  -6   1  13   38.54    1.48 
  -6   1  13   36.82    1.41 
  -6  -1  13   38.13    1.39 
  -6   1 -13   29.09    1.52 
  -6   1 -13   37.55    1.26 
  -7   1  13   10.59    0.51 
  -7   1  13   10.99    0.47 
  -7   1  13   10.80    0.48 
  -7   1  13   10.70    0.41 
  -7  -1  13    8.17    0.38 
  -7   1 -13   11.04    0.40 
  -7  -1  13   10.59    0.47 
   0  -2 -13    2.98    0.26 
   0  -2 -13    2.95    0.25 
   0  -2 -13    3.01    0.27 
   0  -2 -13    2.46    0.33 
   0  -2 -13    2.86    0.20 
  -1  -2 -13  104.08    3.61 
  -1  -2 -13  105.18    3.49 
  -1   2  13  102.83    3.52 
  -1  -2 -13  103.66    3.66 
  -1  -2 -13  101.24    3.48 
  -1  -2 -13  101.92    3.55 
  -1  -2 -13   97.48    3.51 
  -1  -2  13  110.65    3.76 
  -1   2 -13  110.43    3.84 
   1   2  13  112.59    3.85 
  -1   2 -13  111.75    3.85 
  -2  -2 -13   15.81    0.66 
   2  -2  13   16.14    0.72 
  -2  -2 -13   16.89    0.66 
  -2  -2 -13   16.28    0.78 
  -2   2  13   16.27    0.70 
  -2  -2 -13   16.99    0.66 
  -2  -2 -13   15.12    0.66 
  -2   2  13   16.26    0.64 
  -2  -2 -13   15.53    0.69 
  -2  -2 -13   16.88    0.81 
  -2   2 -13   17.99    0.71 
  -2  -2  13   16.79    0.64 
  -2  -2  13   13.74    0.70 
  -2   2 -13   17.13    0.81 
   2   2  13   14.88    0.69 
  -2   2 -13   15.98    0.71 
  -2   2 -13   17.21    0.64 
  -3  -2 -13  228.02    7.70 
  -3  -2 -13  228.66    7.69 
  -3  -2 -13  231.07    7.85 
  -3  -2 -13  230.59    7.70 
  -3   2  13  225.40    7.68 
  -3   2  13  227.51    7.74 
  -3  -2 -13  224.88    7.85 
   3  -2  13  240.20    7.77 
   3   2  13  243.55    8.00 
  -3  -2  13  236.53    7.87 
  -3   2 -13  235.10    8.08 
  -3  -2  13  235.01    7.92 
  -3   2 -13  236.39    7.98 
  -4   2  13    5.55    0.54 
  -4   2  13    6.25    0.42 
  -4  -2 -13    6.39    0.34 
  -4   2  13    6.25    0.47 
  -4  -2 -13    5.88    0.33 
  -4  -2 -13    6.01    0.43 
  -4  -2 -13    6.19    0.33 
  -4   2  13    5.92    0.36 
  -4  -2  13    6.54    0.33 
  -4  -2  13    6.92    0.45 
  -4   2 -13    6.79    0.44 
  -4   2 -13    6.36    0.47 
  -4  -2  13    6.50    0.37 
  -4  -2  13    6.43    0.40 
  -4  -2  13    6.74    0.46 
  -4   2 -13    6.30    0.34 
  -4   2 -13    6.44    0.35 
  -4   2 -13    6.72    0.41 
  -5   2  13   14.25    0.59 
  -5   2  13   13.03    0.58 
  -5  -2 -13   12.50    0.51 
  -5   2  13   12.53    0.69 
  -5   2  13   12.44    0.54 
  -5   2  13   12.67    0.57 
  -5   2  13   12.45    0.63 
  -5   2 -13   13.69    0.57 
  -5   2 -13   13.22    0.67 
  -5  -2  13   14.04    0.52 
  -5   2 -13   13.20    0.59 
  -5  -2  13   13.87    0.55 
  -5  -2  13   14.16    0.69 
  -6   2  13    1.32    0.22 
  -6   2  13    1.19    0.17 
  -6   2  13    1.58    0.27 
  -6   2  13    1.53    0.19 
  -6   2 -13    1.11    0.13 
  -6  -2  13    1.23    0.22 
  -6   2 -13    1.34    0.17 
   0  -3 -13   22.19    0.92 
   0  -3 -13   23.03    0.99 
   0  -3 -13   22.31    0.94 
   0  -3 -13   21.73    0.87 
  -1  -3 -13    1.93    0.24 
  -1  -3 -13    2.16    0.19 
  -1  -3 -13    2.31    0.28 
  -1  -3 -13    2.10    0.29 
  -1  -3 -13    1.86    0.18 
  -1  -3 -13    1.72    0.21 
  -1  -3 -13    1.89    0.19 
  -1  -3  13    2.00    0.16 
  -1   3 -13    1.86    0.22 
   1   3  13    1.62    0.20 
  -1   3 -13    2.16    0.24 
  -2   3  13    6.10    0.36 
  -2  -3 -13    5.48    0.31 
  -2  -3 -13    5.34    0.34 
  -2  -3 -13    5.44    0.31 
  -2  -3 -13    5.38    0.42 
  -2  -3 -13    6.14    0.33 
  -2   3 -13    7.61    0.38 
  -2  -3  13    7.49    0.36 
   2   3  13    8.29    0.44 
  -2  -3  13    8.20    0.40 
  -2   3 -13    8.67    0.46 
  -3  -3 -13   48.28    1.67 
  -3   3  13   44.30    1.69 
  -3  -3 -13   47.91    1.69 
  -3  -3 -13   46.36    1.70 
  -3  -3 -13   46.90    1.70 
  -3   3  13   48.96    1.75 
  -3   3 -13   53.23    1.93 
  -4  -3 -13   19.28    0.73 
  -4   3  13   17.50    0.76 
  -4   3  13   18.40    0.79 
  -4  -3 -13   18.73    0.75 
  -4   3  13   18.30    0.89 
  -4   3  13   17.89    0.81 
  -4  -3  13   17.74    0.78 
  -4   3 -13   18.94    0.75 
  -4  -3  13   19.02    0.73 
  -4   3 -13   18.91    0.74 
  -4   3 -13   18.00    0.72 
  -4   3 -13   18.66    0.80 
  -4  -3  13   18.24    0.77 
  -4  -3  13   16.92    0.83 
  -4   3 -13   18.47    0.89 
  -5   3  13   17.70    0.76 
  -5  -3 -13   18.93    0.74 
  -5   3  13   19.17    0.88 
  -5   3  13   17.96    0.80 
  -5   3  13   18.74    0.75 
  -5   3  13   17.92    0.75 
  -5   3 -13   24.09    0.93 
  -5   3 -13   23.32    1.03 
  -5  -3  13   23.44    0.87 
   5  -3 -13   23.84    1.39 
  -5   3 -13   24.06    0.89 
  -6   3  13   19.33    0.74 
  -6   3  13   19.84    0.81 
  -6   3  13   19.41    0.75 
  -6   3  13   18.96    0.85 
  -6   3 -13   19.00    0.70 
   6  -3 -13   18.59    1.10 
  -6   3 -13   19.10    0.71 
   0  -4 -13   36.76    1.35 
   0  -4 -13   38.11    1.36 
   0  -4 -13   36.80    1.36 
   0  -4 -13   35.00    1.42 
  -1  -4 -13    5.31    0.37 
  -1  -4 -13    5.91    0.33 
  -1  -4 -13    5.11    0.31 
  -1  -4 -13    5.45    0.25 
  -1   4  13    5.73    0.35 
  -1  -4 -13    5.09    0.41 
  -1   4 -13    3.78    0.32 
   1  -4 -13    3.94    0.27 
   1   4  13    3.82    0.30 
  -1  -4  13    4.12    0.23 
  -2  -4 -13    5.38    0.36 
  -2  -4 -13    6.95    0.36 
  -2  -4 -13    6.27    0.35 
  -2  -4 -13    6.25    0.34 
  -2   4  13    5.91    0.37 
  -2  -4  13    6.36    0.33 
  -2   4 -13    6.47    0.40 
  -2   4 -13    6.36    0.34 
  -3   4  13   56.40    2.25 
  -3   4  13   56.99    1.98 
  -3  -4 -13   56.93    1.95 
  -3   4  13   55.55    2.00 
  -3  -4 -13   55.68    1.95 
  -3  -4 -13   52.70    2.01 
  -3   4  13   53.12    2.08 
  -3  -4 -13   55.24    1.94 
  -3   4  13   54.89    1.95 
  -3  -4 -13   53.09    1.88 
  -3  -4 -13   56.32    1.92 
  -3   4  13   47.90    2.97 
  -3   4 -13   54.01    2.07 
  -3  -4  13   53.95    2.07 
  -3  -4  13   54.43    1.98 
  -3   4 -13   54.18    2.08 
   3  -4 -13   56.61    2.41 
  -3   4 -13   55.82    1.96 
  -3   4 -13   53.06    1.88 
  -3  -4  13   54.40    2.00 
  -3   4 -13   48.57    1.97 
  -4  -4 -13   54.12    1.85 
  -4  -4 -13   50.02    1.82 
  -4   4  13   50.05    1.86 
  -4   4  13   52.91    2.01 
  -4  -4  13   46.00    1.92 
  -4   4 -13   48.78    1.82 
  -4   4 -13   47.75    1.70 
  -4   4 -13   49.57    1.73 
  -4   4 -13   48.83    1.78 
  -4  -4  13   47.46    1.70 
  -4  -4  13   48.96    1.77 
  -4   4 -13   47.13    1.73 
  -4   4 -13   49.29    1.88 
   4  -4 -13   48.69    2.19 
  -4  -4  13   49.59    1.74 
  -5  -4 -13    8.37    0.40 
  -5   4  13    9.04    0.44 
  -5   4  13    8.23    0.49 
  -5   4  13    8.89    0.42 
  -5   4  13    8.42    0.45 
  -5   4 -13    7.79    0.36 
   5  -4 -13    7.00    0.67 
  -5   4 -13    7.93    0.48 
  -5   4 -13    8.37    0.41 
  -6   4  13    4.53    0.24 
  -6   4  13    4.69    0.28 
  -6   4  13    4.30    0.30 
  -6   4  13    4.24    0.24 
  -6   4 -13    4.28    0.21 
  -6   4 -13    4.05    0.21 
   6  -4 -13    3.97    0.42 
  -6   4 -13    3.93    0.28 
   0  -5 -13   50.33    1.94 
   0  -5  13   50.83    1.88 
   0  -5 -13   46.53    1.78 
   0  -5 -13   50.89    1.77 
   0  -5  13   46.56    1.82 
   0  -5  13   53.58    2.04 
   0  -5 -13   49.97    1.88 
   0  -5 -13   51.78    1.87 
   0  -5 -13   48.77    1.81 
   0   5  13   47.95    2.23 
   0  -5 -13   49.27    2.22 
  -1   5  13   26.14    1.32 
  -1  -5 -13   26.37    1.10 
  -1  -5 -13   26.58    1.05 
   1   5 -13   27.07    1.07 
  -1  -5 -13   29.24    1.14 
  -1   5  13   25.36    1.06 
  -1  -5 -13   26.76    1.02 
  -1  -5 -13   25.75    1.15 
  -1  -5 -13   28.42    1.10 
  -1  -5 -13   27.20    1.03 
   1  -5  13   25.85    1.35 
   1   5 -13   25.63    1.35 
   1  -5 -13   25.89    1.05 
  -1  -5  13   26.41    1.21 
  -1  -5  13   29.10    1.27 
   1  -5 -13   27.37    1.07 
  -1   5 -13   27.05    1.10 
  -1   5 -13   26.65    1.23 
   1  -5 -13   28.73    1.23 
  -1  -5  13   27.21    1.11 
  -1  -5  13   27.92    1.06 
  -2  -5 -13   13.60    0.60 
  -2  -5 -13   13.02    0.60 
  -2  -5 -13   13.10    0.66 
  -2  -5 -13   13.40    0.61 
  -2  -5 -13   13.63    0.59 
  -2  -5 -13   14.01    0.59 
   2  -5  13   13.87    0.99 
  -2  -5 -13   12.60    0.65 
   2   5 -13   12.33    0.91 
   2   5 -13   13.86    0.63 
  -2  -5 -13   13.58    0.62 
  -2   5  13   13.58    0.64 
  -2   5 -13   13.83    0.95 
  -2   5 -13   15.74    0.78 
  -2  -5  13   13.01    0.75 
  -2   5 -13   13.79    0.64 
  -2  -5  13   13.76    0.50 
  -2   5 -13   14.10    0.57 
  -2  -5  13   12.30    0.64 
  -2  -5  13   13.59    0.65 
  -2   5 -13   13.35    0.71 
   2  -5 -13   13.65    0.73 
  -3   5  13   78.21    2.82 
  -3   5  13   80.26    3.10 
   3  -5  13   82.08    3.35 
  -3  -5 -13   79.79    2.80 
  -3   5  13   80.96    3.30 
  -3  -5 -13   80.12    2.78 
  -3   5  13   80.88    2.80 
  -3  -5 -13   78.75    2.87 
  -3  -5 -13   83.35    2.81 
   3   5 -13   84.35    3.43 
   3  -5 -13   66.47    3.39 
  -3  -5  13   74.45    2.59 
  -3  -5  13   74.77    2.59 
   3  -5 -13   70.72    2.78 
  -3   5 -13   72.26    2.67 
  -3   5 -13   72.46    2.60 
  -3   5 -13   74.68    2.75 
  -3   5 -13   74.18    2.56 
  -3  -5  13   70.72    2.66 
  -3   5 -13   75.27    2.68 
  -4  -5 -13    2.02    0.18 
   4  -5  13    2.14    0.49 
  -4   5  13    2.20    0.23 
  -4  -5 -13    3.02    0.24 
  -4  -5  13    1.85    0.24 
  -4   5 -13    2.21    0.24 
  -4   5 -13    1.99    0.21 
  -4   5 -13    2.22    0.27 
  -4   5 -13    2.14    0.28 
  -4   5 -13    2.01    0.28 
  -4   5 -13    2.07    0.21 
  -4   5 -13    2.52    0.20 
   4  -5 -13    2.09    0.40 
  -5  -5 -13   19.97    0.90 
  -5   5  13   21.93    0.82 
  -5   5  13   21.42    0.82 
   5  -5  13   22.10    1.16 
  -5   5 -13   16.70    0.66 
   5  -5 -13   16.41    0.87 
  -5   5 -13   16.28    0.66 
  -5   5 -13   16.94    0.63 
  -5   5 -13   16.98    0.73 
   0   6  13    1.52    0.43 
   0  -6 -13    1.22    0.26 
   0  -6  13    1.40    0.35 
   0  -6 -13    1.61    0.16 
   0  -6 -13    1.36    0.24 
   0  -6 -13    1.33    0.27 
   0  -6  13    1.33    0.31 
   0  -6 -13    1.50    0.22 
  -1  -6 -13   21.38    0.91 
   1  -6  13   22.39    1.00 
   1   6 -13   21.80    1.09 
  -1  -6 -13   22.25    0.91 
  -1   6  13   19.91    1.08 
  -1  -6 -13   21.75    0.93 
  -1  -6 -13   22.50    0.98 
  -1  -6 -13   22.43    0.88 
  -1  -6  13   20.54    0.87 
   1  -6 -13   20.42    1.26 
  -1   6 -13   20.89    0.99 
   1  -6 -13   19.07    0.83 
  -1  -6  13   20.66    0.79 
   1  -6 -13   19.90    0.96 
   1  -6 -13   19.45    0.91 
   1  -6 -13   21.12    0.84 
   1   6  13   20.83    1.25 
  -1  -6  13   21.31    0.83 
   1  -6 -13   20.77    0.89 
  -1  -6  13   20.46    0.99 
  -1   6 -13   21.32    0.86 
  -2  -6 -13   22.89    0.92 
  -2  -6 -13   22.49    0.89 
   2   6 -13   24.26    1.24 
  -2  -6 -13   23.51    0.92 
  -2  -6 -13   22.48    0.92 
   2  -6  13   24.26    1.19 
  -2  -6 -13   22.63    0.97 
  -2  -6 -13   22.40    0.90 
  -2  -6 -13   26.15    1.18 
  -2  -6 -13   22.21    0.88 
  -2   6 -13   21.89    1.12 
  -2  -6  13   23.05    1.03 
  -2   6 -13   22.18    0.91 
  -2   6 -13   22.56    1.02 
  -2   6 -13   21.83    0.81 
  -2   6 -13   21.59    1.08 
  -2  -6  13   22.54    0.93 
  -3   6  13   82.65    2.89 
   3  -6  13   90.35    3.33 
  -3  -6 -13   82.99    2.89 
  -3   6  13   84.68    3.16 
   3   6 -13   84.27    3.27 
  -3  -6 -13   79.57    2.93 
  -3  -6 -13   83.39    2.88 
  -3  -6  13   75.05    2.71 
  -3   6 -13   81.16    2.74 
  -3   6 -13   78.87    2.79 
  -3  -6  13   81.44    2.70 
  -3   6 -13   80.99    2.65 
  -3   6 -13   65.75    3.03 
  -3  -6  13   81.65    2.79 
  -3   6 -13   74.96    2.77 
   4   6 -13   42.88    1.86 
  -4   6  13   43.58    1.54 
  -4  -6 -13   41.41    1.50 
  -4   6  13   40.98    1.52 
  -4   6  13   43.08    1.62 
   4  -6  13   48.32    1.89 
  -4   6 -13   40.09    1.51 
  -4  -6  13   41.05    1.44 
  -4   6 -13   41.15    1.45 
  -4   6 -13   42.36    1.48 
  -4   6 -13   41.05    1.42 
  -4   6 -13   40.41    1.40 
  -4   6 -13   33.19    1.54 
   0  -7 -13   16.94    0.78 
   0  -7  13   14.12    0.64 
   0  -7 -13   13.44    0.69 
   0  -7 -13   13.77    0.62 
   0  -7 -13   14.01    0.67 
   0  -7  13   14.68    0.75 
   0   7  13   13.47    0.77 
   0  -7  13   15.04    0.97 
  -1  -7 -13    3.75    0.27 
  -1  -7 -13    3.63    0.32 
  -1  -7 -13    3.80    0.33 
   1  -7  13    3.48    0.35 
  -1  -7 -13    3.46    0.26 
  -1   7 -13    3.05    0.34 
   1  -7 -13    3.07    0.28 
   1  -7 -13    3.27    0.27 
  -1  -7  13    3.68    0.29 
  -1   7 -13    3.29    0.51 
  -1  -7  13    3.66    0.37 
   1   7  13    3.37    0.45 
   1  -7 -13    3.35    0.34 
  -2   7  13   29.52    1.68 
   2   7 -13   29.62    1.23 
  -2  -7 -13   27.40    1.06 
  -2  -7 -13   28.63    1.11 
  -2  -7 -13   27.31    1.05 
  -2  -7  13   24.32    1.03 
   2  -7 -13   25.79    1.26 
  -2   7 -13   25.74    1.06 
  -2  -7  13   25.65    0.99 
  -2  -7  13   25.49    0.98 
   2   7  13   24.84    1.26 
   2  -7 -13   24.25    1.05 
  -2   7 -13   26.50    0.97 
  -3   7  13   28.57    1.11 
   3   7 -13   28.45    1.21 
  -3  -7 -13   25.88    1.00 
  -3  -7 -13   28.78    1.06 
  -3  -7  13   25.91    1.00 
  -3   7 -13   25.95    0.99 
  -3  -7  13   26.98    0.99 
   3  -7 -13   26.37    1.50 
  -3   7 -13   27.32    1.00 
  -3  -7  13   27.88    0.94 
  -3   7 -13   25.31    1.03 
  -3   7 -13   25.90    0.93 
   0  -8 -13    1.37    0.15 
   0  -8 -13    1.63    0.20 
   0  -8 -13    1.60    0.19 
   0  -8  13    1.47    0.22 
   0   8 -13    1.34    0.34 
   0  -8 -13    1.48    0.16 
  -1  -8 -13    3.93    0.23 
  -1  -8 -13    4.43    0.29 
  -1  -8 -13    3.72    0.26 
   1   8  13    3.56    0.35 
   1  -8 -13    4.26    0.29 
  -1  -8  13    3.87    0.26 
  -1  -8  13    4.00    0.26 
  -1  -8  13    4.18    0.30 
   0   0 -14   10.06    0.57 
   0   0 -14   10.60    0.53 
  -1   0 -14   38.66    1.49 
  -1   0 -14   38.64    1.53 
  -1   0 -14   38.36    1.56 
   1   0  14   46.38    1.59 
  -1   0 -14   37.27    1.44 
  -1   0 -14   37.97    1.46 
  -1   0  14   39.51    1.40 
  -2   0 -14   96.39    3.38 
  -2   0  14  100.68    3.43 
  -2   0 -14   96.24    3.42 
  -2   0  14   99.18    3.35 
  -2   0 -14   97.68    3.27 
  -2   0 -14  101.60    3.51 
  -2   0 -14   97.61    3.53 
   3   0  14  289.18    9.85 
  -3   0 -14  304.29    9.83 
  -3   0 -14  303.06   10.00 
  -3   0  14  278.03    9.77 
  -4   0  14   16.88    0.79 
  -4   0  14   17.00    0.84 
  -4   0  14   16.05    0.75 
  -4   0 -14   17.30    0.82 
  -4   0  14   16.92    0.74 
  -4   0  14   16.56    0.78 
  -4   0 -14   16.13    0.70 
  -5   0  14    2.19    0.23 
  -5   0 -14    1.99    0.19 
  -5   0  14    2.08    0.20 
  -5   0 -14    1.96    0.27 
  -5   0  14    2.47    0.29 
  -5   0  14    2.43    0.19 
  -5   0  14    1.86    0.25 
  -5   0  14    2.52    0.31 
  -6   0  14    1.06    0.21 
  -6   0  14    0.60    0.20 
  -6   0  14    0.61    0.23 
   0  -1 -14    2.90    0.26 
   0   1 -14    2.68    0.26 
   0  -1 -14    3.12    0.27 
   0  -1 -14    2.86    0.28 
   0   1 -14    2.73    0.29 
  -1  -1 -14    4.18    0.36 
  -1  -1 -14    4.37    0.27 
  -1  -1 -14    4.14    0.31 
  -1   1  14    4.32    0.24 
  -1  -1 -14    4.34    0.35 
  -1  -1 -14    4.22    0.29 
  -1  -1  14    2.70    0.17 
  -1   1 -14    2.45    0.24 
  -1   1 -14    3.00    0.30 
  -1   1 -14    2.44    0.24 
   1   1  14    2.35    0.24 
  -2  -1 -14  157.96    5.43 
  -2  -1 -14  150.32    5.27 
  -2  -1 -14  165.25    5.34 
  -2   1  14  154.70    5.26 
  -2  -1 -14  154.87    5.44 
   2  -1  14  161.91    5.34 
  -2  -1 -14  149.18    5.27 
  -2   1 -14  141.00    4.90 
  -2  -1  14  142.95    4.92 
   2   1  14  142.90    4.93 
  -2   1 -14  150.48    4.93 
  -2   1 -14  145.22    5.03 
  -2   1 -14  144.90    4.81 
  -2  -1  14  139.74    4.84 
  -3   1  14   55.56    1.97 
   3  -1  14   54.49    2.05 
  -3  -1 -14   54.73    2.12 
  -3  -1 -14   56.66    2.01 
  -3   1  14   59.52    1.99 
  -3  -1 -14   56.88    2.16 
  -3  -1  14   60.00    2.13 
  -3  -1  14   64.36    2.11 
  -3   1 -14   63.02    2.32 
  -3   1 -14   62.85    2.19 
   3   1  14   56.91    2.20 
  -4   1  14   14.49    0.77 
  -4  -1 -14   14.49    0.61 
  -4   1  14   13.14    0.68 
  -4   1  14   13.29    0.63 
  -4   1  14   13.56    0.69 
  -4   1  14   13.49    0.66 
  -4  -1 -14   15.00    0.74 
  -4  -1  14   10.77    0.58 
  -4  -1  14   10.08    0.52 
  -4  -1  14   10.17    0.51 
  -4  -1  14    9.95    0.55 
  -4   1 -14   10.00    0.50 
  -4   1 -14    9.81    0.42 
  -4   1 -14   10.47    0.58 
  -4   1 -14    9.80    0.60 
  -5   1  14    4.95    0.37 
  -5   1  14    5.11    0.31 
  -5   1  14    4.73    0.31 
  -5  -1 -14    4.79    0.26 
  -5   1  14    4.74    0.28 
  -5  -1 -14    4.93    0.37 
  -5   1  14    4.58    0.36 
  -5   1  14    4.79    0.42 
  -5  -1  14    4.95    0.37 
  -5  -1  14    5.14    0.27 
  -5  -1  14    5.01    0.38 
  -5  -1  14    4.75    0.31 
  -5  -1  14    5.02    0.27 
  -5   1 -14    4.93    0.37 
  -5   1 -14    4.94    0.29 
  -6   1  14   25.56    1.03 
  -6   1  14   27.76    1.05 
  -6   1  14   25.94    0.97 
  -6   1  14   25.58    1.08 
  -6  -1  14   23.72    0.97 
  -6   1 -14   24.43    0.88 
   0   2  14    2.32    0.17 
   0  -2 -14    2.46    0.27 
   0  -2 -14    2.61    0.26 
   0  -2 -14    2.46    0.23 
   0  -2 -14    2.41    0.21 
  -1  -2 -14   44.48    1.73 
  -1  -2 -14   49.45    1.89 
  -1  -2 -14   47.79    1.77 
  -1  -2 -14   47.45    1.84 
  -1  -2 -14   49.09    1.68 
  -1  -2 -14   48.01    1.70 
  -1   2  14   47.84    1.68 
  -1   2  14   48.02    1.75 
   1   2  14   44.65    1.64 
  -1  -2  14   43.82    1.54 
  -1   2 -14   42.58    1.62 
  -1   2 -14   43.41    1.63 
  -2  -2 -14    9.58    0.47 
  -2   2  14   10.04    0.45 
  -2  -2 -14   11.02    0.47 
  -2  -2 -14   10.17    0.47 
  -2   2  14   10.90    0.51 
  -2  -2 -14   10.76    0.51 
  -2  -2 -14    9.84    0.59 
   2  -2  14   10.14    0.53 
  -2  -2 -14   11.15    0.62 
  -2   2 -14    7.80    0.44 
  -2  -2  14    7.57    0.42 
   2   2  14    6.90    0.41 
  -2   2 -14    7.22    0.34 
  -2  -2  14    7.07    0.34 
  -3  -2 -14   39.50    1.50 
  -3  -2 -14   42.54    1.66 
  -3  -2 -14   41.50    1.49 
  -3  -2 -14   39.76    1.49 
  -3   2  14   42.49    1.49 
  -3   2 -14   36.63    1.37 
  -3   2 -14   36.30    1.46 
  -3  -2  14   36.01    1.25 
  -4   2  14   80.32    2.86 
  -4   2  14   84.30    2.81 
  -4   2  14   71.99    3.05 
  -4  -2 -14   81.72    2.92 
  -4  -2 -14   78.86    2.76 
  -4  -2 -14   80.54    2.77 
  -4   2  14   81.28    2.94 
  -4  -2  14   79.12    2.78 
  -4   2 -14   81.76    2.72 
  -4  -2  14   76.68    2.72 
  -4   2 -14   75.05    2.78 
  -4  -2  14   77.72    2.80 
  -4   2 -14   75.68    2.64 
  -4   2 -14   78.57    2.66 
  -4  -2  14   73.33    2.70 
  -4   2 -14   75.40    2.83 
  -4  -2  14   74.90    2.65 
  -5   2  14   45.88    1.77 
  -5   2  14   46.94    1.64 
  -5   2  14   40.57    1.72 
  -5   2  14   42.21    1.63 
  -5  -2 -14   46.46    1.57 
  -5   2  14   45.58    1.69 
  -5   2  14   47.69    1.63 
  -5   2 -14   46.55    1.62 
  -5   2 -14   47.48    1.65 
  -5  -2  14   45.45    1.73 
  -5  -2  14   43.77    1.66 
  -5   2 -14   45.68    1.75 
  -5  -2  14   47.03    1.57 
  -5  -2  14   45.23    1.61 
  -6   2  14   11.54    0.61 
  -6   2  14   12.09    0.51 
  -6   2  14   12.86    0.52 
  -6   2  14   11.78    0.55 
   6  -2 -14   13.65    0.96 
  -6   2 -14   12.94    0.52 
  -6  -2  14   12.98    0.60 
  -6   2 -14   13.41    0.50 
   0  -3 -14    1.77    0.24 
   0  -3 -14    1.45    0.18 
   0  -3 -14    1.19    0.22 
  -1  -3 -14   45.77    1.66 
  -1   3  14   44.84    1.74 
  -1  -3 -14   44.31    1.54 
  -1  -3 -14   42.98    1.73 
  -1  -3 -14   43.93    1.59 
  -1  -3 -14   42.96    1.60 
  -1  -3 -14   43.89    1.76 
   1  -3 -14   38.35    1.41 
   1   3  14   37.88    1.48 
  -1   3 -14   38.37    1.48 
  -1  -3  14   38.92    1.37 
  -2  -3 -14    4.07    0.27 
  -2  -3 -14    4.61    0.39 
  -2  -3 -14    3.75    0.27 
  -2   3  14    5.48    0.32 
  -2  -3 -14    4.02    0.27 
  -2  -3 -14    3.67    0.30 
  -2   3 -14    6.23    0.39 
  -2  -3  14    6.30    0.35 
  -2   3 -14    6.43    0.33 
  -3   3  14   45.31    2.21 
  -3  -3 -14   44.34    1.72 
  -3  -3 -14   44.46    1.60 
  -3   3  14   44.59    1.75 
  -3   3  14   44.74    1.67 
  -3  -3 -14   45.93    1.65 
  -3   3  14   44.96    1.79 
  -3  -3 -14   44.30    1.63 
  -3  -3 -14   47.16    1.64 
  -3   3  14   45.51    1.63 
  -3   3  14   47.13    1.69 
  -3  -3 -14   45.92    1.64 
   3  -3 -14   40.07    1.96 
  -3   3 -14   36.74    1.60 
  -3   3 -14   42.24    1.56 
  -3   3 -14   40.53    1.55 
  -3   3 -14   43.37    1.53 
  -3  -3  14   40.48    1.54 
  -3  -3  14   42.63    1.67 
  -3  -3  14   40.51    1.63 
  -3   3 -14   40.30    1.54 
  -3   3 -14   39.36    1.65 
  -4   3  14    3.42    0.36 
  -4   3  14    3.75    0.29 
  -4   3  14    3.86    0.32 
  -4  -3 -14    3.88    0.25 
  -4  -3 -14    3.76    0.27 
  -4   3 -14    2.14    0.21 
  -4  -3  14    2.13    0.28 
  -4   3 -14    2.04    0.31 
  -4  -3  14    2.00    0.19 
  -4   3 -14    1.94    0.29 
   4  -3 -14    2.34    0.54 
  -4   3 -14    2.36    0.26 
  -4   3 -14    2.40    0.23 
  -4  -3  14    2.05    0.25 
  -4   3 -14    1.82    0.20 
  -4   3 -14    1.94    0.24 
  -5  -3 -14    4.99    0.30 
  -5   3  14    5.52    0.43 
  -5   3  14    5.47    0.32 
  -5   3  14    5.56    0.33 
  -5   3  14    5.84    0.33 
  -5   3  14    5.70    0.37 
  -5  -3 -14    5.45    0.30 
   5  -3 -14    5.65    0.66 
  -5   3 -14    5.80    0.33 
  -5   3 -14    5.52    0.41 
  -5   3 -14    5.71    0.30 
  -6   3  14   10.37    0.44 
  -6   3  14   10.01    0.52 
  -6   3  14   10.55    0.44 
  -6   3  14   10.36    0.47 
   6  -3 -14   11.54    0.76 
  -6   3 -14   11.35    0.43 
  -6   3 -14   11.71    0.46 
   0  -4 -14    2.10    0.26 
   0  -4 -14    2.15    0.21 
   0  -4 -14    2.10    0.20 
   0  -4 -14    2.15    0.24 
  -1   4  14   18.42    1.09 
  -1  -4 -14   19.81    0.78 
  -1  -4 -14   19.35    0.78 
  -1  -4 -14   19.04    0.86 
   1   4 -14   18.36    1.09 
   1  -4  14   18.71    1.18 
   1   4 -14   18.85    0.80 
  -1  -4 -14   19.73    0.91 
  -1  -4 -14   18.49    0.82 
  -1  -4 -14   18.10    0.84 
   1  -4 -14   13.32    0.65 
   1  -4 -14   10.71    0.83 
  -1   4 -14   14.13    0.64 
   1  -4 -14   14.09    0.59 
  -1   4 -14   13.74    0.66 
  -1  -4  14   12.28    0.94 
  -1  -4  14   13.98    0.81 
  -1   4 -14   11.30    0.79 
  -1  -4  14   14.11    0.65 
  -2  -4 -14   14.92    0.73 
  -2  -4 -14   14.44    0.66 
  -2   4  14   13.83    0.64 
   2   4 -14   13.95    1.01 
  -2  -4 -14   14.70    0.63 
  -2  -4 -14   15.09    0.66 
  -2  -4 -14   15.86    0.68 
  -2   4  14   14.98    0.67 
  -2  -4 -14   15.05    0.63 
  -2  -4 -14   14.92    0.64 
  -2  -4 -14   14.38    0.65 
  -2  -4 -14   13.88    0.70 
  -2  -4  14   14.56    0.71 
   2  -4 -14   16.36    1.20 
  -2   4 -14   14.55    0.70 
  -2   4 -14   14.87    0.94 
  -2  -4  14   15.36    0.61 
  -2  -4  14   15.31    0.66 
  -2  -4  14   14.20    0.79 
  -2  -4  14   14.61    0.94 
  -2   4 -14   15.00    0.69 
  -2   4 -14   15.40    0.78 
  -2   4 -14   16.13    0.61 
  -2   4 -14   16.03    0.83 
  -3   4  14   44.78    1.66 
  -3   4  14   45.45    1.69 
  -3  -4 -14   46.31    1.72 
  -3  -4 -14   47.12    1.64 
   3  -4  14   37.40    2.63 
  -3  -4 -14   45.14    1.64 
  -3  -4 -14   46.30    1.62 
  -3   4  14   47.69    1.64 
  -3   4  14   48.27    2.17 
  -3  -4 -14   44.06    1.55 
   3   4 -14   44.92    2.15 
  -3  -4  14   46.10    1.72 
  -3   4 -14   45.13    1.79 
  -3   4 -14   47.08    1.72 
  -3  -4  14   45.13    1.80 
  -3   4 -14   44.35    1.68 
  -3  -4  14   46.03    1.74 
   3  -4 -14   46.01    2.04 
  -3   4 -14   47.24    1.74 
  -3   4 -14   47.73    1.83 
  -4  -4 -14   18.25    0.73 
  -4   4  14   19.55    0.78 
  -4  -4 -14   18.65    0.75 
  -4   4  14   18.15    0.87 
  -4   4 -14   20.61    0.84 
  -4   4 -14   20.55    0.78 
  -4   4 -14   20.94    0.85 
  -4   4 -14   23.17    0.99 
  -4   4 -14   20.02    0.92 
  -4   4 -14   19.31    0.80 
  -4   4 -14   20.81    0.93 
  -4  -4  14   19.78    0.84 
  -4  -4  14   19.24    0.87 
   4  -4 -14   19.55    1.14 
  -5   4  14    0.47    0.15 
  -5   4  14    0.40    0.15 
  -5   4  14    0.59    0.17 
  -5   4  14    0.38    0.11 
  -5  -4 -14    0.27    0.13 
  -5   4 -14    0.69    0.16 
   5  -4 -14    0.49    0.35 
  -5   4 -14    0.52    0.21 
  -5   4 -14    0.74    0.14 
   0  -5 -14   11.07    0.65 
   0  -5 -14   11.07    0.54 
   0  -5 -14   11.75    0.61 
   0  -5  14   12.96    0.82 
   0   5  14   10.64    0.86 
   0  -5 -14   11.03    0.78 
   0  -5 -14   10.55    0.57 
   0  -5 -14   11.19    0.50 
  -1  -5 -14   30.45    1.25 
  -1  -5 -14   31.85    1.19 
  -1  -5 -14   28.08    1.17 
   1  -5  14   29.47    1.39 
  -1   5  14   29.71    1.36 
  -1  -5 -14   28.60    1.19 
  -1  -5 -14   28.72    1.11 
  -1  -5 -14   30.86    1.15 
   1   5 -14   28.74    1.38 
  -1   5 -14   33.18    1.43 
  -1  -5  14   33.78    1.44 
  -1  -5  14   33.74    1.23 
   1  -5 -14   33.14    1.40 
   1  -5 -14   32.96    1.26 
  -1  -5  14   31.59    1.28 
  -1  -5  14   34.39    2.24 
  -1  -5  14   30.86    1.35 
   1   5  14   34.03    1.93 
  -1   5 -14   33.40    1.29 
   2  -5  14   11.34    0.87 
  -2  -5 -14   10.74    0.51 
  -2  -5 -14   11.01    0.50 
  -2  -5 -14   10.67    0.51 
  -2  -5 -14   10.04    0.52 
  -2  -5 -14   10.62    0.56 
   2   5 -14   11.05    0.84 
  -2  -5 -14   11.57    0.53 
  -2   5  14   10.89    0.71 
  -2  -5 -14   10.61    0.57 
  -2  -5 -14    9.93    0.49 
  -2   5 -14   10.40    0.54 
  -2   5 -14   10.92    0.62 
  -2   5 -14   10.94    0.45 
  -2   5 -14   12.05    0.77 
  -2  -5  14   10.91    0.56 
  -2   5 -14   10.86    0.65 
  -2  -5  14   10.39    0.65 
  -2   5 -14   10.97    0.56 
  -3  -5 -14    5.57    0.32 
  -3  -5 -14    5.71    0.33 
   3  -5  14    6.10    0.67 
  -3   5  14    5.28    0.58 
  -3  -5 -14    4.90    0.29 
  -3   5  14    5.48    0.33 
  -3  -5 -14    5.65    0.38 
  -3   5  14    5.74    0.31 
   3   5 -14    5.40    0.60 
  -3  -5  14    5.16    0.36 
  -3   5 -14    5.16    0.33 
  -3  -5  14    4.80    0.40 
  -3  -5  14    4.91    0.34 
  -3   5 -14    5.15    0.28 
  -3   5 -14    4.93    0.39 
  -3   5 -14    5.77    0.42 
  -3   5 -14    4.94    0.35 
   3  -5 -14    5.00    0.45 
  -3   5 -14    5.42    0.36 
   4  -5  14   29.81    1.48 
  -4  -5 -14   27.97    1.07 
   4   5 -14   28.32    1.42 
  -4   5  14   29.63    1.09 
  -4  -5 -14   28.95    1.05 
   4  -5 -14   24.55    1.12 
  -4   5 -14   24.99    1.03 
  -4   5 -14   25.37    0.95 
   4  -5 -14   23.34    1.06 
  -4   5 -14   24.96    0.90 
  -4   5 -14   23.94    0.94 
  -4   5 -14   24.50    0.89 
  -4  -5  14   23.28    0.85 
  -4   5 -14   23.39    0.97 
  -4  -5  14   23.91    0.94 
   5   5 -14    6.46    0.53 
  -5   5  14    6.55    0.30 
   5  -5  14    6.05    0.54 
  -5   5  14    7.02    0.32 
  -5   5 -14    6.45    0.32 
  -5   5 -14    6.47    0.29 
  -5   5 -14    6.76    0.31 
   5  -5 -14    6.61    0.43 
   5  -5 -14    6.34    0.47 
  -5   5 -14    6.67    0.38 
   0  -6 -14   27.97    1.18 
   0  -6  14   29.63    1.25 
   0  -6 -14   29.98    1.13 
   0   6  14   30.41    1.41 
   0  -6 -14   28.71    1.17 
   0  -6 -14   28.61    1.22 
   0  -6  14   29.70    1.29 
  -1  -6 -14   18.30    0.76 
   1   6 -14   18.05    1.00 
  -1  -6 -14   17.01    0.82 
  -1  -6 -14   18.11    0.80 
  -1  -6 -14   18.11    0.78 
  -1  -6 -14   17.87    0.74 
   1  -6 -14   17.60    0.70 
  -1   6 -14   16.63    0.85 
   1  -6 -14   17.61    0.81 
  -1   6 -14   17.10    0.71 
   1   6  14   17.66    1.09 
  -1  -6  14   17.69    0.75 
  -1  -6  14   18.12    0.95 
  -1  -6  14   16.98    0.86 
   1  -6 -14   18.28    0.86 
   1  -6 -14   18.43    0.73 
  -1   6 -14   15.16    1.15 
  -1  -6  14   16.92    0.65 
   1  -6 -14   17.61    1.03 
   2  -6  14   29.96    1.30 
  -2  -6 -14   29.11    1.12 
  -2  -6 -14   24.87    1.21 
  -2  -6 -14   30.55    1.13 
   2   6 -14   31.13    1.38 
  -2  -6 -14   30.73    1.18 
  -2  -6 -14   30.83    1.08 
  -2  -6 -14   30.30    1.10 
  -2  -6  14   27.40    1.10 
  -2  -6  14   27.71    1.16 
   2  -6 -14   26.83    1.17 
  -2   6 -14   28.45    1.16 
  -2   6 -14   25.55    1.07 
  -2   6 -14   28.13    1.39 
  -2   6 -14   25.73    1.05 
  -2  -6  14   28.18    1.07 
  -3  -6 -14   49.84    1.78 
   3   6 -14   49.87    2.07 
   3  -6  14   51.63    2.06 
  -3   6  14   49.76    1.90 
  -3  -6 -14   53.56    1.85 
  -3  -6 -14   50.33    1.78 
  -3   6 -14   59.45    2.13 
  -3  -6  14   56.55    2.12 
  -3   6 -14   58.09    2.14 
  -3   6 -14   59.13    2.08 
  -3   6 -14   58.32    2.01 
  -3  -6  14   60.19    2.08 
  -3   6 -14   58.79    2.07 
  -3  -6  14   58.74    2.05 
  -4   6  14   36.99    1.33 
  -4  -6 -14   35.18    1.29 
   4   6 -14   37.76    1.58 
   4  -6  14   39.71    1.57 
  -4   6  14   37.92    1.37 
  -4   6 -14   37.58    1.34 
  -4   6 -14   36.91    1.29 
  -4   6 -14   36.60    1.37 
  -4   6 -14   36.83    1.35 
  -4  -6  14   38.47    1.34 
  -4   6 -14   38.40    1.40 
   0  -7 -14   11.15    0.51 
   0  -7  14    9.74    0.69 
   0  -7  14   11.17    0.61 
   0   7  14   10.24    0.67 
   0  -7 -14   11.75    0.57 
   0  -7 -14   11.33    0.53 
   0  -7 -14   11.27    0.50 
  -1  -7 -14    4.15    0.32 
  -1  -7 -14    5.01    0.30 
  -1  -7 -14    4.87    0.33 
   1  -7  14    4.74    0.37 
  -1  -7 -14    4.77    0.28 
   1  -7 -14    5.31    0.30 
   1   7  14    5.05    0.48 
  -1   7 -14    5.61    0.53 
  -1  -7  14    5.28    0.32 
  -1   7 -14    4.83    0.40 
   1  -7 -14    4.99    0.38 
  -1  -7  14    5.86    0.42 
  -2  -7 -14   39.05    1.41 
  -2  -7 -14   36.83    1.39 
  -2  -7 -14   40.91    1.46 
  -2   7  14   42.78    1.75 
   2  -7  14   37.25    1.53 
  -2  -7  14   41.40    1.47 
  -2   7 -14   40.95    1.55 
  -2  -7  14   40.79    1.47 
  -2   7 -14   40.08    1.46 
  -2   7 -14   39.14    1.41 
   2  -7 -14   44.59    1.65 
  -2  -7  14   40.64    1.53 
   2   7  14   40.58    1.73 
   2  -7 -14   39.34    1.53 
  -3  -7 -14   23.40    0.83 
  -3   7  14   22.43    0.93 
   3   7 -14   22.66    1.00 
   3   7  14   25.58    1.38 
  -3   7 -14   25.01    1.00 
   3  -7 -14   26.78    1.18 
  -3  -7  14   28.04    0.98 
  -3   7 -14   27.04    0.97 
   0   0 -15    0.06    0.13 
   0   0 -15    0.05    0.15 
  -1   0  15   33.66    1.23 
  -1   0 -15   35.07    1.28 
  -1   0 -15   34.76    1.43 
  -1   0 -15   32.91    1.32 
  -1   0 -15   35.40    1.32 
  -2   0 -15    6.75    0.40 
  -2   0 -15    6.10    0.46 
   2   0  15    6.45    0.38 
  -2   0  15    6.28    0.32 
  -3   0 -15   10.27    0.59 
  -3   0  15    8.82    0.48 
  -3   0  15    8.89    0.41 
  -3   0  15    8.77    0.65 
  -3   0 -15    9.41    0.49 
  -3   0 -15    9.19    0.56 
  -3   0 -15    7.89    0.58 
  -3   0  15    8.09    0.65 
  -3   0 -15    8.95    0.45 
  -3   0 -15    7.80    0.66 
  -3   0  15    9.32    0.49 
  -3   0  15    8.85    0.76 
  -4   0  15    1.96    0.32 
  -4   0  15    1.04    0.23 
  -4   0  15    1.01    0.25 
  -4   0  15    1.37    0.23 
  -4   0  15    1.36    0.20 
  -4   0 -15    0.98    0.23 
  -4   0 -15    0.90    0.19 
  -5   0  15   57.92    2.09 
  -5   0 -15   58.56    1.98 
  -5   0  15   56.10    2.12 
  -5   0  15   58.67    2.07 
  -5   0 -15   53.57    2.09 
  -5   0  15   53.31    2.00 
  -5   0  15   57.36    1.97 
  -6   0  15    4.17    0.31 
  -6   0  15    4.19    0.28 
  -6   0  15    4.30    0.33 
   0   1 -15    6.26    0.40 
   0   1 -15    5.59    0.42 
   0  -1 -15    5.84    0.37 
   0  -1 -15    6.23    0.40 
  -1  -1 -15   49.22    1.72 
  -1  -1 -15   47.43    1.75 
  -1  -1 -15   46.72    1.85 
  -1  -1 -15   46.03    1.78 
  -1   1  15   48.56    1.70 
  -1  -1 -15   50.64    1.90 
  -1   1 -15   45.31    1.67 
  -1   1 -15   46.24    1.72 
  -1   1 -15   47.26    1.73 
  -1  -1  15   46.98    1.63 
  -1   1 -15   45.34    1.79 
  -2  -1 -15  170.31    5.74 
  -2  -1 -15  168.04    5.84 
  -2  -1 -15  179.18    5.88 
  -2  -1 -15  166.37    5.69 
  -2   1  15  161.15    5.67 
   2  -1  15  166.81    5.76 
   2   1  15  181.65    6.29 
  -2   1 -15  193.71    6.29 
  -2   1 -15  178.96    6.13 
  -2   1 -15  184.95    6.39 
  -2  -1  15  186.15    6.20 
  -3  -1 -15   11.83    0.57 
  -3  -1 -15   10.69    0.52 
  -3   1  15   11.81    0.51 
  -3   1  15   11.23    0.62 
  -3  -1 -15   11.09    0.65 
  -3   1  15   11.35    0.90 
  -3  -1 -15   11.47    0.63 
  -3   1  15   12.49    0.58 
  -3   1  15   11.88    0.67 
  -3  -1 -15   10.96    0.52 
  -3   1  15   11.46    0.60 
  -3   1 -15   10.41    0.59 
  -3  -1  15   10.37    0.52 
  -3  -1  15    9.29    0.61 
  -3   1 -15    9.76    0.61 
  -3   1 -15    8.69    0.50 
  -3  -1  15    9.85    0.69 
  -3   1 -15    9.84    0.52 
  -3   1 -15   10.14    0.50 
  -3   1 -15    9.85    0.58 
  -3  -1  15    9.64    0.57 
  -3  -1  15   10.20    0.41 
  -3   1 -15    9.35    0.57 
  -3   1 -15   10.03    0.51 
  -4   1  15   13.83    0.68 
  -4  -1 -15   15.13    0.74 
  -4   1  15   14.60    0.68 
  -4   1  15   13.18    0.63 
  -4   1  15   13.77    0.74 
  -4  -1 -15   14.31    0.61 
  -4   1  15   14.18    0.70 
  -4   1 -15   20.81    0.75 
  -4   1 -15   20.28    0.97 
  -4  -1  15   21.31    0.93 
  -4   1 -15   21.27    0.95 
  -4   1 -15   20.88    0.86 
  -4  -1  15   20.03    0.87 
  -4  -1  15   21.45    0.93 
  -4  -1  15   20.36    0.87 
  -5  -1 -15    1.62    0.16 
  -5  -1 -15    1.22    0.23 
  -5   1  15    1.53    0.19 
  -5   1  15    1.93    0.19 
  -5   1  15    1.84    0.26 
  -5   1  15    1.73    0.28 
  -5   1  15    1.85    0.26 
  -5  -1  15    1.37    0.14 
  -5  -1  15    1.37    0.23 
  -5   1 -15    1.22    0.17 
  -5  -1  15    1.05    0.19 
  -5   1 -15    1.21    0.23 
  -5  -1  15    1.33    0.24 
  -6   1  15   34.00    1.31 
  -6   1  15   36.99    1.38 
  -6   1  15   37.24    1.28 
  -6   1  15   35.13    1.32 
  -6   1  15   34.81    1.26 
   6  -1 -15   35.36    1.66 
  -6  -1  15   36.31    1.35 
   0  -2 -15   15.47    0.66 
   0  -2 -15   17.14    0.76 
  -1  -2 -15   18.98    0.80 
  -1   2  15   20.36    0.78 
  -1  -2 -15   20.35    0.97 
  -1  -2 -15   20.79    0.95 
  -1  -2 -15   20.16    0.78 
  -1  -2 -15   21.55    0.88 
  -1   2 -15   21.19    0.87 
   1  -2 -15   19.51    0.82 
  -1   2 -15   21.71    0.89 
  -2  -2 -15   28.14    1.06 
  -2  -2 -15   28.25    1.22 
  -2  -2 -15   27.87    1.11 
  -2  -2 -15   28.55    1.08 
  -2  -2  15   32.12    1.23 
  -2   2 -15   33.53    1.29 
  -2   2 -15   33.12    1.16 
  -3   2  15   17.70    0.83 
  -3  -2 -15   18.39    0.75 
  -3  -2 -15   19.32    0.75 
  -3  -2 -15   17.94    0.90 
  -3   2  15   18.13    0.90 
  -3  -2 -15   18.17    0.84 
  -3   2  15   18.81    0.85 
   3   2 -15   19.00    1.26 
  -3   2  15   18.58    0.79 
  -3   2  15   18.56    1.17 
  -3   2  15   19.43    0.75 
  -3  -2 -15   17.93    0.77 
  -3  -2 -15   17.56    0.75 
  -3  -2 -15   17.78    0.73 
  -3  -2  15   17.13    0.86 
  -3   2 -15   16.65    0.85 
  -3   2 -15   16.47    0.74 
   3  -2 -15   16.91    1.15 
  -3   2 -15   15.69    0.74 
  -3   2 -15   16.75    0.76 
  -3   2 -15   16.26    0.79 
  -3   2 -15   17.27    0.72 
  -3   2 -15   15.94    0.82 
  -3  -2  15   15.92    0.77 
  -3  -2  15   16.76    0.75 
  -4   2  15   13.99    0.63 
  -4   2  15   15.02    0.69 
  -4   2  15   13.76    0.68 
  -4   2  15   14.13    0.75 
  -4  -2 -15   13.32    0.59 
  -4  -2 -15   14.21    0.72 
  -4   2 -15   13.99    0.73 
  -4  -2  15   13.52    0.67 
   4  -2 -15   14.64    1.07 
  -4  -2  15   12.52    0.61 
  -4   2 -15   13.09    0.67 
  -4  -2  15   12.70    0.61 
  -4   2 -15   14.04    0.55 
  -4   2 -15   13.16    0.62 
  -5   2  15    7.85    0.49 
  -5  -2 -15    6.64    0.31 
  -5   2  15    7.03    0.42 
  -5   2  15    6.52    0.37 
  -5   2  15    7.17    0.37 
  -5   2  15    7.05    0.36 
  -5   2 -15    4.65    0.55 
   5  -2 -15    6.77    0.69 
  -5  -2  15    5.67    0.35 
  -5  -2  15    6.34    0.40 
  -5   2 -15    6.02    0.33 
  -6   2  15   24.65    0.97 
  -6   2  15   26.79    0.94 
  -6   2  15   24.90    0.92 
  -6   2  15   24.93    1.02 
   6  -2 -15   24.93    1.23 
  -6  -2  15   25.29    0.96 
  -6   2 -15   24.51    0.88 
   0  -3 -15    7.03    0.40 
   0  -3 -15    7.13    0.51 
   0  -3 -15    6.60    0.43 
   0  -3 -15    7.42    0.38 
  -1  -3 -15  172.37    6.02 
  -1  -3 -15  178.51    5.85 
  -1  -3 -15  163.89    5.89 
  -1  -3 -15  175.06    5.75 
  -1  -3 -15  174.15    5.84 
   1  -3 -15  174.08    5.88 
  -1   3 -15  174.05    5.95 
  -2  -3 -15   20.85    0.86 
  -2  -3 -15   20.64    0.86 
  -2   3  15   20.29    0.96 
  -2  -3 -15   22.18    0.84 
   2  -3  15   20.08    1.34 
  -2  -3 -15   20.80    0.97 
  -2  -3 -15   21.05    0.83 
  -2  -3 -15   19.36    0.92 
  -2   3  15   19.01    0.84 
  -2   3  15   21.24    0.87 
  -2  -3 -15   20.82    0.88 
  -2  -3 -15   20.84    0.83 
  -2  -3 -15   22.00    0.88 
  -2  -3 -15   21.27    0.93 
   2   3 -15   20.75    1.25 
  -2   3 -15   23.42    1.10 
  -2   3 -15   22.49    1.08 
  -2  -3  15   23.47    1.02 
  -2   3 -15   24.69    0.98 
  -2   3 -15   21.28    0.96 
  -2  -3  15   23.21    0.98 
  -2  -3  15   23.27    1.10 
  -2  -3  15   23.69    1.38 
  -2   3 -15   24.11    0.85 
  -2   3 -15   22.53    1.07 
  -2  -3  15   23.78    0.89 
   2  -3 -15   23.31    1.21 
  -3   3  15   11.23    0.64 
   3   3 -15   10.30    0.91 
  -3   3  15   10.78    0.58 
  -3  -3 -15   11.72    0.58 
  -3  -3 -15   10.33    0.51 
  -3   3  15   10.97    0.53 
  -3  -3 -15   11.03    0.58 
  -3   3  15   10.80    0.49 
  -3  -3 -15   10.65    0.45 
  -3  -3 -15   10.93    0.50 
  -3   3  15   10.00    0.87 
  -3   3 -15   12.71    0.57 
   3  -3 -15   11.84    0.89 
  -3  -3  15   11.07    0.73 
  -3   3 -15   11.87    0.60 
  -3  -3  15   12.30    0.60 
  -3   3 -15   12.23    0.61 
  -3   3 -15   12.03    0.59 
  -3   3 -15   12.70    0.67 
  -3   3 -15   11.85    0.68 
  -3  -3  15   12.21    0.68 
  -4  -3 -15    9.21    0.44 
  -4  -3 -15    9.46    0.45 
  -4   3  15    9.95    0.58 
  -4   3  15    9.32    0.51 
  -4   3  15    9.77    0.47 
   4  -3 -15    7.14    0.73 
  -4  -3  15    7.20    0.35 
  -4   3 -15    6.37    0.45 
  -4  -3  15    6.12    0.38 
  -4   3 -15    6.81    0.33 
  -4   3 -15    5.86    0.37 
  -4  -3  15    6.50    0.37 
  -4   3 -15    6.52    0.44 
  -4   3 -15    6.31    0.34 
  -4  -3  15    6.58    0.43 
  -4   3 -15    6.77    0.39 
  -5   3  15    3.80    0.29 
  -5   3  15    3.91    0.26 
  -5   3  15    3.96    0.27 
  -5   3  15    3.80    0.35 
  -5   3 -15    3.84    0.25 
  -5  -3  15    3.62    0.27 
  -5   3 -15    3.40    0.22 
  -5   3 -15    3.30    0.31 
   5  -3 -15    3.66    0.54 
  -6   3  15    9.00    0.44 
  -6   3  15    8.13    0.38 
  -6   3  15    8.46    0.41 
  -6   3  15    9.16    0.42 
   6  -3 -15    9.85    0.62 
   0  -4 -15    0.66    0.28 
   0  -4 -15    0.61    0.15 
   0  -4 -15    0.51    0.16 
   0  -4 -15    0.58    0.19 
   0  -4 -15    0.51    0.19 
   0  -4 -15    0.64    0.18 
   0  -4  15    0.42    0.28 
   0  -4 -15    0.48    0.37 
   0  -4 -15    0.71    0.19 
   0   4  15    0.81    0.43 
  -1   4  15   39.30    1.69 
   1   4 -15   37.03    1.70 
  -1  -4 -15   36.98    1.41 
  -1  -4 -15   33.83    1.39 
  -1  -4 -15   37.78    1.48 
  -1  -4 -15   37.31    1.52 
  -1  -4 -15   38.89    1.39 
  -1  -4 -15   38.19    1.45 
   1  -4  15   38.17    1.77 
  -1   4 -15   39.07    1.45 
  -1   4 -15   36.84    1.45 
  -1  -4  15   37.33    1.57 
  -1  -4  15   38.28    1.60 
   1  -4 -15   36.26    1.39 
  -1  -4  15   38.27    1.44 
   1  -4 -15   35.45    1.40 
  -1   4 -15   39.45    1.61 
   1  -4 -15   37.48    1.56 
  -2  -4 -15    8.31    0.45 
  -2  -4 -15    8.71    0.50 
  -2  -4 -15    8.66    0.52 
  -2   4  15    7.14    0.66 
   2   4 -15    8.82    0.76 
  -2  -4 -15    9.13    0.46 
  -2  -4 -15    9.15    0.45 
  -2  -4 -15    8.87    0.44 
   2  -4  15    9.76    0.85 
  -2  -4 -15    9.14    0.47 
  -2   4  15    8.82    0.46 
  -2  -4 -15    8.59    0.45 
  -2   4 -15    9.38    0.61 
  -2  -4  15    9.68    0.63 
  -2   4 -15    9.10    0.51 
  -2  -4  15    9.99    0.41 
  -2   4 -15    9.92    0.60 
  -2  -4  15    8.45    0.50 
  -2   4 -15    9.89    0.51 
  -2  -4  15    9.71    0.68 
  -2   4 -15    9.88    0.60 
  -2   4 -15    9.49    0.39 
  -3  -4 -15   10.40    0.50 
  -3   4  15   10.93    0.84 
  -3  -4 -15   10.94    0.50 
   3   4 -15   11.28    0.87 
  -3   4  15   11.31    0.62 
  -3   4  15   11.54    0.49 
   3  -4  15   10.00    0.90 
  -3   4  15   10.10    0.51 
  -3  -4 -15   10.90    0.57 
  -3   4 -15   15.87    0.71 
  -3  -4  15   16.05    0.72 
  -3   4 -15   16.51    0.81 
  -3  -4  15   17.04    0.76 
  -3   4 -15   17.26    0.81 
  -3   4 -15   15.65    0.73 
   3  -4 -15   15.42    0.89 
  -3  -4  15   16.71    0.80 
  -3   4 -15   16.51    0.71 
   4   4 -15   21.66    1.21 
  -4   4  15   21.15    0.93 
   4  -4  15   17.49    1.40 
  -4  -4 -15   21.02    0.80 
  -4   4  15   22.65    0.85 
  -4  -4 -15   22.86    0.83 
  -4   4 -15   21.44    0.80 
  -4   4 -15   21.45    0.94 
  -4  -4  15   21.57    0.86 
  -4  -4  15   20.52    0.80 
  -4   4 -15   20.88    0.84 
   4  -4 -15   21.11    1.09 
  -4   4 -15   21.53    0.85 
  -4  -4  15   20.73    0.89 
  -4   4 -15   20.86    0.79 
  -5   4  15   24.67    1.01 
   5   4 -15   25.75    1.30 
  -5   4  15   26.54    0.95 
  -5   4  15   26.95    0.96 
   5  -4 -15   30.02    1.28 
  -5   4 -15   28.11    1.04 
  -5  -4  15   28.38    1.07 
  -5   4 -15   29.56    1.15 
  -5   4 -15   30.54    1.07 
   0  -5 -15    1.60    0.28 
   0  -5 -15    1.70    0.25 
   0  -5 -15    2.06    0.23 
   0  -5 -15    2.00    0.16 
   0   5  15    1.61    0.43 
   0  -5 -15    1.54    0.27 
   0  -5 -15    1.65    0.26 
   0  -5  15    1.85    0.44 
   0  -5  15    1.72    0.37 
  -1  -5 -15   26.87    1.03 
  -1  -5 -15   26.36    1.06 
  -1  -5 -15   26.27    1.06 
   1   5 -15   24.81    1.19 
  -1  -5 -15   26.64    1.08 
  -1  -5 -15   24.75    1.09 
   1  -5  15   26.83    1.21 
  -1  -5 -15   26.47    1.00 
  -1  -5  15   26.03    0.99 
   1  -5 -15   28.87    1.57 
   1  -5 -15   24.24    1.34 
   1  -5 -15   26.34    1.02 
  -1   5 -15   25.68    1.17 
   1   5  15   24.77    1.42 
   1  -5 -15   26.41    1.15 
  -1  -5  15   27.02    1.05 
  -1  -5  15   26.74    1.19 
  -1  -5  15   26.72    1.10 
  -1   5 -15   26.27    1.01 
  -1   5 -15   24.49    1.03 
  -1  -5  15   26.07    1.44 
   1  -5 -15   25.67    1.02 
  -2  -5 -15  110.08    3.79 
  -2  -5 -15  103.58    3.71 
  -2  -5 -15  111.07    3.72 
  -2   5  15  111.72    3.94 
   2   5 -15  113.11    4.09 
  -2  -5 -15  102.92    3.73 
  -2  -5 -15  110.32    3.79 
  -2  -5 -15  109.41    3.71 
   2  -5  15  112.65    4.10 
  -2  -5 -15  104.29    3.73 
  -2  -5 -15  107.58    3.74 
  -2  -5  15  109.34    3.74 
  -2   5 -15  102.50    3.90 
  -2   5 -15  109.41    3.73 
  -2   5 -15  108.01    3.85 
  -2  -5  15  111.12    3.87 
  -2   5 -15  105.92    3.81 
  -2   5 -15  109.83    3.74 
  -3   5  15    4.10    0.46 
  -3   5  15    4.16    0.27 
   3  -5  15    3.68    0.53 
  -3  -5 -15    3.79    0.26 
  -3  -5 -15    4.07    0.27 
   3   5 -15    3.62    0.50 
  -3   5  15    3.41    0.26 
  -3  -5 -15    3.74    0.32 
  -3   5 -15    3.99    0.51 
  -3   5 -15    5.06    0.34 
  -3  -5  15    4.90    0.34 
  -3  -5  15    5.11    0.35 
  -3  -5  15    4.61    0.38 
  -3   5 -15    5.05    0.39 
  -3   5 -15    4.71    0.38 
  -3   5 -15    5.19    0.33 
  -4  -5 -15    4.73    0.24 
   4  -5  15    4.85    0.52 
   4   5 -15    4.57    0.49 
  -4  -5 -15    3.67    0.27 
  -4   5  15    4.80    0.28 
  -4   5  15    4.77    0.32 
   4  -5 -15    3.96    0.29 
  -4   5 -15    3.99    0.26 
  -4   5 -15    3.72    0.31 
  -4   5 -15    3.63    0.22 
  -4  -5  15    4.14    0.27 
  -4   5 -15    4.02    0.22 
  -4   5 -15    4.06    0.27 
   0  -6 -15   17.48    0.83 
   0  -6  15   18.61    0.84 
   0  -6 -15   16.92    0.72 
   0  -6 -15   18.21    0.83 
   0  -6 -15   16.88    0.77 
   0   6  15   17.03    0.92 
   0  -6  15   17.01    0.85 
  -1  -6 -15    2.63    0.28 
  -1  -6 -15    2.92    0.25 
  -1  -6 -15    2.82    0.30 
   1  -6  15    2.62    0.36 
  -1  -6 -15    2.66    0.24 
   1  -6 -15    3.28    0.36 
   1   6  15    3.78    0.50 
   1  -6 -15    3.17    0.26 
   1  -6 -15    3.48    0.36 
  -1   6 -15    3.36    0.50 
  -1  -6  15    3.24    0.28 
  -1   6 -15    3.41    0.37 
  -1  -6  15    3.88    0.40 
   2  -6  15   63.20    2.28 
  -2  -6 -15   61.77    2.19 
   2   6 -15   62.98    2.36 
  -2  -6 -15   64.80    2.19 
  -2  -6 -15   60.89    2.11 
  -2  -6 -15   61.26    2.16 
  -2  -6 -15   62.55    2.23 
  -2  -6  15   61.83    2.18 
  -2   6 -15   64.53    2.28 
   2  -6 -15   58.43    2.26 
   2  -6 -15   62.39    2.58 
  -2  -6  15   61.96    2.26 
  -2  -6  15   60.38    2.20 
   2   6  15   59.93    2.53 
  -2   6 -15   63.12    2.17 
   3   6 -15   23.83    1.10 
  -3  -6 -15   23.85    0.88 
  -3  -6 -15   23.46    0.92 
   3  -6  15   24.20    1.03 
  -3  -6  15   21.33    0.84 
  -3   6 -15   21.13    0.89 
  -3   6 -15   21.34    0.88 
  -3   6 -15   21.97    0.84 
  -3   6 -15   20.80    0.77 
  -3   6 -15   22.40    0.84 
  -3  -6  15   22.04    0.81 
  -3  -6  15   20.29    0.85 
   0  -7 -15    3.62    0.27 
   0  -7 -15    3.84    0.29 
   0   7 -15    3.14    0.46 
   0  -7 -15    3.73    0.26 
   0  -7 -15    3.71    0.26 
   0  -7  15    4.47    0.35 
  -1  -7 -15    9.91    0.47 
  -1  -7 -15    9.86    0.46 
  -1  -7 -15    9.79    0.40 
   1  -7  15    8.73    0.70 
   1  -7  15   10.27    0.49 
  -1  -7 -15    9.74    0.44 
   1   7  15   12.59    0.65 
  -1  -7  15   11.21    0.50 
  -1  -7  15   12.52    0.60 
   1  -7 -15   11.68    0.58 
  -1   7 -15   11.33    0.57 
  -2   7  15   12.15    0.63 
  -2  -7 -15   11.91    0.53 
  -2  -7 -15   11.80    0.49 
   2  -7  15   12.02    0.58 
  -2  -7 -15   12.48    0.50 
  -2  -7  15   10.67    0.45 
  -2  -7  15   10.47    0.46 
   2   7  15    9.95    0.62 
  -2  -7  15   10.83    0.51 
  -2   7 -15   11.18    0.47 
   2  -7 -15   11.14    0.54 
  -2   7 -15   10.97    0.53 
   0   0 -16   60.46    2.24 
   0   0 -16   61.81    2.33 
  -1   0 -16   15.17    0.62 
  -1   0 -16   13.57    0.75 
  -1   0  16   14.37    0.59 
  -1   0 -16   15.05    0.70 
  -2   0 -16   35.13    1.59 
  -2   0  16   27.65    1.65 
  -2   0 -16   25.85    1.35 
  -3   0  16    0.62    0.23 
  -3   0  16    0.19    0.23 
  -3   0 -16    0.22    0.13 
  -3   0 -16    0.08    0.11 
  -3   0  16    0.19    0.12 
  -3   0 -16    0.13    0.16 
  -3   0  16    0.06    0.15 
  -3   0 -16    0.06    0.11 
  -3   0 -16    0.14    0.15 
  -3   0 -16    0.51    0.21 
  -3   0  16    0.13    0.10 
  -3   0 -16    0.20    0.17 
  -3   0  16    0.10    0.10 
  -4   0  16   17.32    0.81 
  -4   0 -16   17.77    0.76 
  -4   0  16   19.09    0.80 
  -4   0 -16   18.68    0.86 
  -4   0  16   17.94    0.77 
  -4   0  16   18.92    0.88 
  -4   0  16   17.83    0.83 
  -5   0  16    0.22    0.21 
  -5   0  16    0.18    0.15 
  -5   0  16    0.10    0.10 
  -5   0 -16    0.22    0.12 
  -5   0  16    0.10    0.09 
  -5   0  16    0.15    0.13 
  -6   0  16   42.67    1.50 
  -6   0  16   43.53    1.55 
   6   0 -16   40.92    1.81 
  -6   0  16   43.44    1.50 
  -6   0  16   43.75    1.60 
  -6   0  16   42.93    1.53 
   0   1 -16    0.37    0.16 
   0  -1 -16    0.53    0.17 
   0  -1 -16    0.61    0.21 
   0   1 -16    0.49    0.18 
  -1  -1 -16   60.60    2.17 
  -1  -1 -16   57.61    2.27 
  -1  -1 -16   59.63    2.07 
  -1   1 -16   58.43    2.24 
  -1   1 -16   59.41    2.10 
  -1  -1  16   59.00    2.07 
  -1   1 -16   61.02    2.17 
  -2  -1 -16   51.18    1.95 
  -2  -1 -16   49.81    1.83 
  -2   1  16   49.53    1.98 
  -2  -1 -16   48.08    1.94 
  -2   1  16   47.11    1.81 
  -2  -1 -16   46.66    1.82 
  -2   1  16   52.38    1.91 
  -2  -1 -16   46.53    1.87 
  -2  -1 -16   49.32    1.77 
  -2  -1 -16   47.50    1.90 
  -2  -1 -16   49.33    1.85 
  -2   1  16   48.72    2.00 
  -2  -1 -16   58.32    2.03 
  -2   1 -16   46.68    1.78 
  -2  -1  16   45.41    1.69 
  -2   1 -16   44.62    1.82 
  -2   1 -16   45.00    1.81 
  -2   1 -16   40.12    1.68 
  -2  -1  16   45.00    1.74 
   2  -1 -16   42.86    1.73 
  -2   1 -16   46.19    1.67 
  -2  -1  16   45.06    1.83 
  -2  -1  16   44.78    1.82 
  -2   1 -16   47.66    1.79 
  -3   1  16   58.14    2.03 
  -3  -1 -16   55.28    2.03 
  -3  -1 -16   55.98    1.99 
  -3   1  16   54.67    2.03 
  -3  -1 -16   57.74    2.16 
  -3  -1 -16   57.29    2.00 
  -3   1  16   56.43    2.09 
  -3  -1 -16   53.62    2.10 
  -3   1  16   56.33    1.96 
  -3   1  16   56.61    2.17 
  -3   1  16   55.27    2.39 
  -3  -1  16   53.19    1.96 
  -3   1 -16   49.88    1.96 
  -3  -1  16   53.01    2.01 
  -3   1 -16   50.73    2.02 
  -3   1 -16   50.04    1.91 
  -3  -1  16   51.63    1.77 
  -3   1 -16   53.37    1.89 
  -3   1 -16   53.68    1.99 
  -3   1 -16   54.42    1.89 
  -3  -1  16   53.09    2.04 
  -3  -1  16   49.72    1.90 
  -3   1 -16   50.30    1.91 
  -3   1 -16   50.71    1.97 
  -4   1  16    0.49    0.18 
  -4   1  16    0.64    0.18 
  -4  -1 -16    0.65    0.20 
  -4  -1 -16    0.51    0.16 
  -4   1  16    0.43    0.22 
  -4   1  16    0.29    0.15 
  -4   1  16    0.43    0.14 
  -4   1 -16    0.75    0.20 
  -4  -1  16    0.93    0.20 
  -4   1 -16    0.89    0.25 
  -4  -1  16    0.79    0.24 
  -4   1 -16    1.16    0.23 
  -4  -1  16    0.89    0.19 
  -4  -1  16    0.96    0.24 
  -4   1 -16    0.56    0.23 
  -5   1  16    2.83    0.28 
  -5   1  16    2.72    0.23 
  -5   1  16    2.80    0.27 
  -5   1  16    2.73    0.20 
  -5  -1 -16    2.78    0.18 
  -5   1  16    2.76    0.31 
  -5   1 -16    3.07    0.22 
  -5  -1  16    3.01    0.17 
   5  -1 -16    2.97    0.53 
  -5  -1  16    2.68    0.29 
  -5  -1  16    2.47    0.26 
  -5  -1  16    3.13    0.25 
  -6   1  16    5.10    0.30 
  -6   1  16    4.95    0.26 
  -6   1  16    4.41    0.27 
  -6   1  16    4.61    0.33 
  -6   1  16    4.84    0.25 
   6  -1 -16    7.48    0.59 
  -6  -1  16    7.37    0.39 
   0  -2 -16   10.05    0.53 
   0  -2 -16    9.15    0.59 
   0  -2 -16    8.70    0.51 
   0  -2 -16    8.57    0.43 
  -1   2  16    5.72    0.77 
  -1  -2 -16    6.10    0.30 
  -1  -2 -16    5.92    0.46 
   1  -2  16    6.99    0.52 
  -1  -2 -16    6.22    0.35 
  -1  -2 -16    6.08    0.41 
   1  -2  16    4.62    0.94 
  -1  -2 -16    6.81    0.57 
  -1  -2 -16    5.76    0.33 
   1  -2 -16    6.16    0.51 
  -1   2 -16    7.10    0.37 
  -1   2 -16    5.32    0.78 
   1  -2 -16    7.10    0.36 
  -1  -2  16    6.71    0.52 
   1  -2 -16    4.30    0.58 
  -1   2 -16    4.81    0.65 
   1  -2 -16    5.36    0.51 
  -1   2 -16    7.41    0.42 
  -2  -2 -16    6.59    0.46 
  -2  -2 -16    6.08    0.41 
  -2  -2 -16    6.53    0.41 
  -2   2  16    7.26    0.51 
  -2  -2 -16    6.51    0.39 
  -2  -2 -16    6.93    0.48 
  -2  -2 -16    7.14    0.37 
  -2   2  16    6.66    0.55 
  -2  -2 -16    6.43    0.34 
  -2   2  16    6.25    0.38 
  -2   2  16    6.33    0.43 
  -2  -2 -16    6.32    0.45 
  -2  -2 -16    6.51    0.40 
  -2  -2  16    6.32    0.35 
  -2   2 -16    5.89    0.49 
  -2   2 -16    6.32    0.40 
  -2  -2  16    5.91    0.49 
  -2  -2  16    6.00    0.44 
   2  -2 -16    6.33    0.61 
  -2   2 -16    5.93    0.49 
  -2   2 -16    6.40    0.40 
   2  -2 -16    6.23    0.44 
  -2  -2  16    5.84    0.41 
  -2  -2  16    6.36    0.48 
  -3   2  16   28.65    1.10 
  -3   2  16   28.20    1.04 
  -3  -2 -16   26.89    1.15 
  -3  -2 -16   28.43    1.20 
  -3   2  16   27.50    1.10 
  -3   2  16   27.57    1.14 
  -3  -2 -16   29.19    1.06 
  -3  -2 -16   27.25    1.08 
  -3  -2 -16   28.19    1.03 
  -3   2  16   27.21    1.22 
  -3  -2 -16   25.98    1.05 
  -3   2  16   28.79    1.47 
  -3   2 -16   22.76    0.93 
  -3  -2  16   22.20    1.04 
  -3   2 -16   22.40    0.99 
  -3   2 -16   23.78    0.95 
  -3  -2  16   22.47    0.98 
  -3   2 -16   22.50    1.01 
  -3   2 -16   23.72    0.96 
   3  -2 -16   21.43    1.30 
  -3   2 -16   23.38    1.04 
  -3  -2  16   24.01    0.96 
  -3   2 -16   23.94    0.97 
  -3   2 -16   23.08    1.07 
  -4   2  16   31.81    1.18 
  -4   2  16   31.27    1.20 
  -4   2  16   29.60    1.22 
  -4  -2 -16   29.94    1.25 
  -4  -2 -16   29.69    1.13 
  -4   2  16   31.76    1.30 
  -4   2 -16   28.18    1.14 
  -4   2 -16   28.39    1.09 
  -4   2 -16   26.81    1.13 
  -4   2 -16   30.47    1.00 
  -4  -2  16   29.92    1.09 
  -4   2 -16   24.80    1.08 
  -4  -2  16   27.94    1.14 
  -4   2 -16   27.49    1.19 
   4  -2 -16   26.83    1.48 
  -4  -2  16   27.36    1.09 
  -5   2  16   24.39    0.92 
  -5   2  16   24.17    1.03 
  -5   2  16   22.63    0.89 
  -5   2  16   25.06    0.98 
  -5  -2 -16   24.61    0.86 
  -5   2  16   24.14    0.91 
   5  -2 -16   27.56    1.36 
  -5  -2  16   26.09    1.01 
  -5   2 -16   30.36    1.35 
  -5   2 -16   25.52    0.98 
  -5  -2  16   24.59    1.04 
   0   3 -16    7.47    0.45 
   0  -3 -16    7.27    0.52 
   0  -3  16    7.06    0.49 
   0  -3 -16    7.86    0.53 
   0  -3 -16    7.35    0.72 
   0   3  16    6.91    0.71 
   0  -3 -16    7.17    0.39 
   0  -3 -16    7.49    0.42 
   0  -3 -16    7.20    0.38 
   0   3 -16    7.11    0.55 
   0  -3 -16    6.96    0.47 
   0  -3  16    6.47    0.64 
   0  -3 -16    6.71    0.45 
   0  -3 -16    7.14    0.46 
   0  -3  16    7.23    0.60 
  -1   3  16   55.28    2.16 
  -1  -3 -16   57.09    2.14 
   1  -3  16   53.38    2.45 
  -1  -3 -16   59.50    2.02 
  -1  -3 -16   58.44    2.11 
  -1  -3 -16   58.69    2.17 
  -1   3  16   56.31    2.29 
  -1  -3 -16   57.15    2.19 
  -1  -3 -16   57.47    2.08 
  -1  -3 -16   56.92    2.05 
   1  -3  16   51.50    2.11 
   1  -3 -16   52.59    2.05 
   1  -3 -16   49.53    1.86 
   1  -3 -16   53.59    2.00 
  -1  -3  16   52.16    1.92 
  -1  -3  16   51.65    2.08 
   1  -3 -16   49.72    1.88 
  -1   3 -16   51.94    2.01 
  -1   3 -16   53.62    1.93 
  -1   3 -16   51.58    2.07 
  -1  -3  16   50.91    2.09 
  -1   3 -16   53.25    1.87 
  -1  -3  16   50.00    1.97 
  -1   3 -16   55.80    1.95 
  -2  -3 -16   69.42    2.43 
  -2   3  16   67.61    2.62 
   2   3 -16   69.10    2.88 
  -2  -3 -16   68.33    2.42 
  -2  -3 -16   68.11    2.42 
  -2  -3 -16   71.25    2.56 
  -2  -3 -16   66.66    2.48 
  -2  -3 -16   66.66    2.39 
  -2   3  16   67.24    2.41 
  -2   3  16   66.95    2.54 
   2  -3  16   68.55    2.96 
  -2  -3 -16   65.86    2.49 
  -2  -3 -16   69.54    2.43 
  -2  -3  16   60.78    2.32 
  -2   3 -16   64.40    2.44 
  -2   3 -16   63.61    2.45 
  -2  -3  16   62.41    2.22 
  -2   3 -16   66.88    2.33 
  -2  -3  16   65.33    2.33 
  -2   3 -16   64.37    2.33 
  -2  -3  16   65.04    2.70 
  -2  -3  16   65.69    2.47 
  -3   3  16   57.70    2.10 
  -3   3  16   57.78    2.22 
  -3  -3 -16   58.74    2.01 
  -3  -3 -16   58.35    2.08 
  -3  -3 -16   59.34    2.10 
  -3   3  16   61.58    2.53 
  -3   3  16   58.62    2.05 
  -3  -3 -16   57.38    2.16 
  -3   3  16   60.45    2.12 
   3   3 -16   59.67    2.60 
  -3  -3  16   62.98    2.28 
  -3   3 -16   63.57    2.37 
  -3  -3  16   63.12    2.26 
  -3  -3  16   62.26    2.35 
  -3   3 -16   61.05    2.24 
  -3   3 -16   64.47    2.25 
  -3   3 -16   60.61    2.25 
  -3   3 -16   64.45    2.22 
   3  -3 -16   62.73    2.54 
  -3   3 -16   58.21    2.32 
   4   3 -16   19.07    1.19 
  -4  -3 -16   19.80    0.74 
  -4   3  16   19.69    0.89 
  -4   3  16   19.63    0.82 
  -4   3  16   19.41    0.78 
  -4  -3 -16   18.57    0.75 
  -4   3  16   17.98    0.80 
  -4  -3  16   24.63    0.91 
  -4   3 -16   21.06    0.91 
  -4   3 -16   22.32    0.96 
  -4  -3  16   22.73    0.92 
  -4   3 -16   23.51    1.02 
  -4   3 -16   23.18    0.92 
   4  -3 -16   24.39    1.25 
  -4   3 -16   23.65    0.83 
  -5   3  16    2.57    0.23 
  -5   3  16    2.66    0.21 
  -5   3  16    2.48    0.19 
  -5   3  16    2.05    0.27 
  -5  -3  16    3.09    0.23 
   5  -3 -16    3.36    0.43 
  -5   3 -16    3.30    0.22 
  -5   3 -16    3.37    0.29 
   0  -4 -16    1.94    0.22 
   0  -4 -16    1.48    0.30 
   0   4 -16    2.20    0.40 
   0   4  16    2.65    0.50 
   0  -4 -16    1.58    0.19 
   0  -4 -16    1.83    0.23 
   0  -4 -16    2.01    0.39 
   0  -4 -16    1.66    0.27 
   0  -4 -16    2.11    0.27 
   0  -4  16    1.98    0.26 
  -1  -4 -16   10.51    0.52 
  -1   4  16   10.89    0.69 
  -1  -4 -16   10.92    0.58 
  -1  -4 -16   10.81    0.56 
  -1   4  16    9.96    0.82 
   1  -4  16   10.86    0.60 
   1  -4  16   10.44    0.75 
  -1  -4 -16   11.31    0.62 
  -1  -4 -16   11.15    0.56 
  -1  -4 -16   11.42    0.50 
   1  -4 -16    8.32    0.45 
  -1   4 -16    8.89    0.60 
  -1   4 -16    9.41    0.45 
  -1   4 -16    8.98    0.49 
  -1  -4  16    7.64    0.57 
  -1   4 -16    8.16    0.46 
   1  -4 -16    8.37    0.42 
   1   4  16    8.30    0.77 
   1  -4 -16    8.72    0.58 
  -1  -4  16    8.29    0.46 
  -1  -4  16    8.02    0.56 
  -1   4 -16    8.10    0.81 
   2  -4  16   42.63    2.01 
  -2  -4 -16   45.40    1.61 
  -2  -4 -16   42.29    1.61 
   2   4 -16   46.06    1.98 
  -2  -4 -16   45.05    1.63 
  -2  -4 -16   46.18    1.68 
  -2  -4 -16   45.08    1.60 
  -2  -4 -16   42.81    1.67 
  -2   4  16   44.55    1.79 
  -2  -4 -16   43.27    1.61 
  -2  -4 -16   41.58    1.59 
  -2   4 -16   39.18    1.48 
  -2  -4  16   41.18    1.51 
  -2   4 -16   38.34    1.60 
  -2   4 -16   41.29    1.51 
  -2  -4  16   39.37    1.36 
  -2  -4  16   39.15    1.62 
  -2  -4  16   38.77    1.55 
  -2   4 -16   38.92    1.58 
  -3  -4 -16    8.44    0.41 
  -3  -4 -16    8.19    0.48 
   3   4 -16    8.22    0.71 
  -3   4  16    8.54    0.65 
  -3   4  16    7.91    0.50 
  -3   4  16    7.92    0.37 
  -3  -4 -16    8.59    0.43 
  -3   4  16    7.96    0.42 
   3  -4  16    8.56    0.77 
  -3  -4  16    8.78    0.55 
  -3  -4  16    9.37    0.49 
  -3   4 -16    9.53    0.55 
  -3   4 -16    8.79    0.48 
  -3  -4  16    9.22    0.50 
  -3   4 -16    9.26    0.45 
  -3   4 -16    9.72    0.56 
  -3   4 -16    9.20    0.48 
  -4   4  16    3.47    0.25 
   4   4 -16    2.94    0.47 
  -4  -4 -16    3.43    0.24 
   4  -4  16    3.68    0.51 
  -4   4  16    3.44    0.33 
  -4  -4 -16    3.52    0.21 
  -4   4  16    3.58    0.28 
  -4   4 -16    2.24    0.25 
  -4   4 -16    2.63    0.23 
   4  -4 -16    2.53    0.48 
  -4   4 -16    2.60    0.28 
  -4  -4  16    2.68    0.24 
  -4   4 -16    2.60    0.23 
  -4  -4  16    2.66    0.18 
  -5   4  16    6.50    0.28 
  -5   4  16    8.29    0.50 
   5  -4  16    5.85    0.51 
  -5   4  16    6.66    0.31 
   5  -4 -16    5.74    0.37 
  -5   4 -16    5.35    0.33 
  -5   4 -16    5.73    0.27 
   0   5  16    0.04    0.22 
   0  -5 -16    0.24    0.17 
   0  -5  16    0.10    0.20 
   0  -5 -16    0.12    0.11 
   0  -5 -16    0.17    0.16 
   0  -5 -16    0.03    0.14 
  -1  -5 -16   26.92    1.01 
  -1  -5 -16   26.56    1.08 
  -1  -5 -16   27.10    1.06 
   1  -5  16   27.34    1.12 
  -1  -5 -16   25.93    1.06 
  -1  -5 -16   26.11    1.11 
  -1  -5 -16   27.49    1.04 
   1  -5 -16   27.71    1.12 
  -1   5 -16   27.79    1.09 
  -1  -5  16   28.78    1.44 
   1  -5 -16   34.03    1.45 
  -1  -5  16   30.25    1.08 
  -1   5 -16   29.37    1.28 
   1  -5 -16   27.62    1.10 
   1  -5 -16   28.27    1.24 
   1   5  16   31.91    1.55 
  -1   5 -16   29.15    1.47 
  -1  -5  16   29.92    1.29 
  -1   5 -16   30.63    1.15 
   1  -5 -16   30.18    1.50 
  -1  -5  16   29.85    1.15 
  -1  -5  16   30.42    1.14 
  -2  -5 -16   28.65    1.06 
  -2  -5 -16   29.12    1.04 
  -2  -5 -16   27.54    1.01 
  -2  -5 -16   30.56    1.13 
  -2  -5 -16   26.16    1.04 
  -2   5  16   28.48    1.20 
   2  -5  16   22.70    1.35 
   2  -5  16   28.60    1.28 
  -2   5 -16   25.23    1.36 
  -2  -5  16   29.53    1.20 
  -2   5 -16   27.57    1.15 
  -2   5 -16   27.80    1.08 
   2   5  16   25.61    1.50 
  -2   5 -16   29.79    1.20 
  -2  -5  16   27.89    1.08 
  -3  -5 -16    4.36    0.26 
  -3  -5 -16    4.41    0.27 
   3   5 -16    4.36    0.45 
   3  -5  16    4.75    0.49 
  -3  -5 -16    4.13    0.32 
  -3   5 -16    3.72    0.32 
  -3  -5  16    4.01    0.28 
  -3   5 -16    3.58    0.27 
  -3  -5  16    3.73    0.33 
  -3   5 -16    3.83    0.28 
  -3   5 -16    3.46    0.32 
  -3  -5  16    3.99    0.29 
  -4   5  16    6.21    0.31 
  -4   5  16    6.09    0.33 
  -4  -5 -16    6.38    0.27 
   4  -5  16    6.43    0.48 
  -4   5 -16    5.33    0.33 
  -4   5 -16    5.08    0.30 
  -4   5 -16    5.54    0.29 
  -4   5 -16    5.52    0.29 
  -4  -5  16    5.05    0.29 
   0  -6  16    1.12    0.30 
   0  -6 -16    0.86    0.22 
   0   6  16    1.06    0.26 
   0  -6  16    1.15    0.37 
   0  -6 -16    1.09    0.26 
   0  -6  16    1.06    0.20 
   0  -6 -16    1.11    0.19 
   0  -6 -16    0.98    0.21 
   1  -6  16    3.80    0.37 
  -1  -6 -16    3.53    0.24 
  -1  -6 -16    3.69    0.31 
  -1  -6 -16    4.07    0.31 
  -1  -6 -16    3.87    0.27 
  -1  -6  16    3.73    0.27 
   1  -6 -16    3.70    0.35 
  -1   6 -16    3.77    0.35 
  -1   6 -16    4.17    0.48 
   1   6  16    3.73    0.44 
  -1  -6  16    3.41    0.35 
   1  -6 -16    3.51    0.26 
  -2  -6 -16    0.29    0.11 
  -2   6  16    0.43    0.33 
  -2  -6 -16    0.23    0.15 
  -2  -6 -16    0.36    0.15 
   2   6  16    0.18    0.20 
   2  -6 -16    0.11    0.14 
  -2   6 -16    0.30    0.16 
   2  -6 -16    0.11    0.19 
  -2  -6  16    0.07    0.12 
  -2  -6  16    0.33    0.15 
  -2  -6  16    0.11    0.11 
  -2   6 -16    0.23    0.11 
  -3  -6 -16    9.93    0.46 
  -3  -6 -16   10.53    0.42 
   3   6  16    6.70    0.53 
  -3  -6  16    6.31    0.34 
  -3   6 -16    7.16    0.41 
  -3   6 -16    6.83    0.38 
  -3   6 -16    6.68    0.33 
  -3  -6  16    7.04    0.36 
  -3   6 -16    6.94    0.34 
   3  -6 -16    7.32    0.58 
   0  -7 -16    2.90    0.24 
   0   7 -16    3.07    0.37 
   0  -7 -16    3.09    0.21 
   0  -7 -16    3.03    0.21 
   0  -7 -16    2.97    0.24 
   0  -7  16    2.22    0.31 
   1  -7  16    0.93    0.27 
  -1  -7 -16    1.23    0.18 
  -1  -7 -16    0.96    0.14 
   1  -7 -16    0.96    0.20 
  -1  -7  16    1.57    0.23 
   0   0 -17    0.82    0.22 
   0   0 -17    0.03    0.14 
   0   0 -17    0.23    0.14 
   0   0  17   -0.05    0.16 
   0   0 -17    0.13    0.22 
   0   0 -17    0.15    0.19 
   0   0  17    0.72    0.41 
   0   0 -17    0.18    0.16 
  -1   0 -17    8.98    0.41 
   1   0  17    8.57    0.85 
  -1   0  17    8.62    0.60 
  -1   0 -17    8.56    0.59 
  -1   0 -17    8.49    0.52 
  -1   0 -17    8.41    0.72 
  -1   0  17    8.64    0.54 
  -1   0 -17    8.61    0.57 
   1   0 -17    8.70    0.55 
  -1   0 -17    8.68    0.50 
   1   0  17    7.84    0.53 
  -1   0 -17    8.60    0.49 
   1   0 -17    8.06    0.54 
  -2   0  17   18.66    0.79 
  -2   0 -17   18.12    0.78 
  -2   0 -17   17.49    0.89 
  -2   0 -17   18.21    0.90 
  -2   0  17   17.73    0.85 
  -2   0 -17   18.04    0.88 
   2   0  17   17.48    0.86 
  -2   0 -17   17.86    0.81 
  -2   0  17   18.69    0.93 
  -2   0 -17   16.98    0.80 
  -2   0 -17   18.04    0.85 
  -2   0  17   17.97    0.89 
  -3   0 -17  123.80    4.46 
  -3   0 -17  132.47    4.45 
  -3   0 -17  122.15    4.48 
  -3   0  17  129.74    4.52 
  -3   0  17  129.40    4.38 
  -3   0 -17  128.48    4.33 
  -3   0  17  126.11    4.24 
  -3   0  17  123.03    4.41 
  -3   0  17  129.50    4.49 
  -3   0 -17  130.66    4.34 
  -3   0 -17  124.22    4.37 
  -3   0 -17  124.03    4.37 
  -4   0  17   91.87    3.24 
  -4   0 -17   87.20    3.26 
  -4   0  17   91.57    3.29 
  -4   0  17   88.97    3.23 
  -4   0 -17   95.48    3.25 
  -4   0 -17   91.19    3.17 
  -4   0  17   93.36    3.21 
  -4   0  17   94.38    3.19 
  -5   0  17   11.73    0.46 
  -5   0  17   12.34    0.58 
  -5   0  17   11.90    0.56 
  -5   0 -17   12.51    0.49 
  -5   0  17   12.08    0.61 
  -5   0  17   13.30    0.53 
   0  -1 -17    0.20    0.17 
   0   1  17    0.33    0.19 
   0  -1 -17    0.10    0.14 
   0  -1 -17    0.11    0.17 
   0  -1 -17   -0.11    0.18 
   0   1 -17   -0.14    0.13 
   0   1 -17    0.13    0.20 
   0  -1 -17    0.11    0.13 
   0  -1  17    0.20    0.25 
   0   1 -17    0.46    0.21 
   0   1 -17    0.36    0.19 
   0   1 -17    0.42    0.19 
   0  -1 -17    0.67    0.26 
   0   1  17    0.67    0.41 
   0  -1  17    0.50    0.19 
  -1   1  17    2.22    0.39 
   1  -1  17    2.14    0.35 
  -1   1  17    2.01    0.28 
  -1  -1 -17    2.27    0.35 
  -1  -1 -17    2.35    0.31 
  -1  -1 -17    2.02    0.19 
  -1  -1 -17    2.18    0.28 
  -1  -1 -17    1.90    0.33 
  -1  -1 -17    1.90    0.31 
   1  -1  17    1.94    0.52 
  -1  -1 -17    1.86    0.30 
  -1  -1 -17    2.25    0.26 
  -1   1 -17    3.03    0.29 
  -1  -1  17    3.59    0.34 
  -1   1 -17    3.10    0.41 
   1  -1 -17    2.84    0.34 
  -1   1 -17    3.38    0.53 
  -1  -1  17    2.92    0.35 
   1  -1 -17    3.07    0.28 
   1  -1 -17    2.64    0.38 
  -1   1 -17    2.93    0.29 
  -1   1 -17    3.31    0.37 
   1   1  17    3.23    0.59 
  -1   1 -17    3.15    0.33 
  -1   1 -17    2.90    0.24 
  -1   1 -17    3.16    0.37 
  -2   1  17    4.92    0.44 
   2  -1  17    5.46    0.42 
  -2  -1 -17    5.10    0.42 
  -2   1  17    4.68    0.34 
  -2  -1 -17    4.87    0.41 
  -2  -1 -17    4.85    0.37 
  -2   1  17    4.56    0.45 
  -2  -1 -17    4.86    0.35 
  -2  -1 -17    5.40    0.43 
  -2  -1 -17    4.85    0.42 
  -2   1  17    4.99    0.40 
  -2  -1 -17    4.91    0.30 
  -2  -1 -17    4.94    0.33 
  -2  -1 -17    4.49    0.35 
  -2   1 -17    2.78    0.37 
  -2   1 -17    2.88    0.28 
  -2  -1  17    2.48    0.36 
  -2   1 -17    2.76    0.32 
   2  -1 -17    2.88    0.47 
  -2   1 -17    2.63    0.33 
  -2  -1  17    2.55    0.38 
  -2  -1  17    2.94    0.30 
   2  -1 -17    3.09    0.31 
  -2  -1  17    2.33    0.29 
  -2   1 -17    2.53    0.29 
  -2   1 -17    3.15    0.38 
  -2   1 -17    2.74    0.26 
  -2  -1  17    2.51    0.26 
  -3   1  17   11.94    0.57 
  -3  -1 -17   11.17    0.52 
  -3  -1 -17   12.44    0.57 
  -3   1  17   11.19    0.66 
  -3   1  17   11.43    0.48 
  -3  -1 -17   10.52    0.55 
  -3  -1 -17   11.07    0.61 
  -3   1  17   11.25    0.60 
  -3  -1 -17   11.18    0.50 
  -3  -1 -17   11.67    0.64 
  -3   1  17   11.81    0.76 
  -3   1 -17   14.75    0.72 
  -3  -1  17   15.37    0.68 
   3  -1 -17   13.39    0.99 
  -3   1 -17   14.51    0.64 
  -3   1 -17   13.94    0.65 
  -3   1 -17   13.96    0.71 
  -3   1 -17   13.13    0.62 
  -3   1 -17   14.42    0.76 
  -3   1 -17   14.26    0.70 
  -3   1 -17   14.35    0.67 
  -3  -1  17   14.57    0.71 
  -4   1  17   13.05    0.60 
  -4  -1 -17   14.27    0.59 
  -4   1  17   14.23    0.63 
  -4  -1 -17   13.61    0.73 
  -4   1  17   13.02    0.65 
  -4   1  17   13.93    0.66 
  -4  -1 -17   12.03    0.65 
  -4   1  17   13.95    0.72 
  -4  -1  17   16.36    0.74 
   4  -1 -17   16.83    1.08 
  -4  -1  17   16.71    0.76 
  -4   1 -17   15.27    0.77 
  -4  -1  17   16.63    0.71 
  -4  -1  17   16.95    0.71 
  -4   1 -17   14.83    0.74 
  -4   1 -17   16.90    0.69 
  -4   1 -17   16.32    0.74 
  -5   1  17    4.80    0.29 
  -5   1  17    4.98    0.37 
  -5   1  17    4.69    0.24 
  -5   1  17    4.90    0.33 
  -5  -1 -17    4.80    0.23 
  -5   1  17    5.18    0.30 
  -5   1  17    4.81    0.32 
  -5  -1  17    2.46    0.23 
  -5   1 -17    2.89    0.19 
  -5  -1  17    2.91    0.23 
  -5  -1  17    3.15    0.28 
   5  -1 -17    2.91    0.47 
   0  -2 -17    0.18    0.17 
   0  -2 -17    0.78    0.44 
   0  -2 -17    0.13    0.12 
   0   2 -17    0.39    0.20 
   0  -2 -17    0.25    0.19 
   0  -2  17    0.36    0.25 
   0   2  17    0.08    0.29 
   0  -2 -17    0.46    0.18 
   0   2 -17    0.33    0.22 
   0   2 -17    0.35    0.15 
   0   2 -17    0.30    0.22 
   0  -2 -17    0.26    0.14 
   0  -2 -17    0.32    0.16 
   0  -2  17    0.13    0.17 
   0  -2 -17    0.31    0.20 
   1  -2  17   10.87    0.63 
  -1  -2 -17   10.64    0.54 
  -1  -2 -17   10.75    0.61 
   1  -2  17   10.32    0.88 
  -1  -2 -17   11.17    0.51 
  -1  -2 -17   11.83    0.58 
  -1  -2 -17   11.11    0.63 
  -1  -2 -17   11.05    0.65 
  -1   2  17   10.51    0.71 
  -1  -2 -17   11.44    0.66 
  -1   2  17    9.54    0.82 
  -1   2 -17   13.42    0.58 
  -1  -2  17   12.94    0.63 
  -1   2 -17   13.88    0.66 
   1  -2 -17   13.14    0.75 
  -1   2 -17   12.95    0.70 
  -1   2 -17   13.11    0.97 
  -1   2 -17   13.55    0.79 
   1  -2 -17   13.61    0.70 
  -1   2 -17   13.23    0.74 
  -1  -2  17   13.00    0.70 
  -1  -2  17   13.18    0.78 
   1   2  17   13.36    1.03 
   1  -2 -17   14.01    0.63 
  -1   2 -17   13.42    0.65 
  -2   2  17   14.47    0.77 
  -2  -2 -17   14.18    0.72 
  -2  -2 -17   14.66    0.66 
  -2  -2 -17   14.27    0.66 
  -2  -2 -17   15.46    0.67 
  -2  -2 -17   14.82    0.74 
  -2  -2 -17   14.31    0.66 
  -2   2  17   13.97    0.70 
  -2   2  17   14.04    0.64 
  -2  -2 -17   14.65    0.77 
  -2  -2 -17   14.74    0.75 
  -2  -2 -17   14.88    0.63 
  -2   2  17   13.98    0.80 
  -2  -2  17   17.30    0.77 
  -2  -2  17   17.49    0.90 
  -2   2 -17   17.10    0.78 
  -2  -2  17   16.67    0.79 
  -2  -2  17   16.38    0.69 
  -2   2 -17   16.50    0.87 
  -2   2 -17   17.18    0.88 
  -2   2 -17   17.04    0.75 
  -2   2 -17   16.12    0.81 
  -2  -2  17   17.09    1.15 
  -2  -2  17   16.75    0.81 
  -3  -2 -17   32.00    1.24 
  -3   2  17   34.68    1.42 
  -3   2  17   34.04    1.21 
  -3   2  17   33.41    1.33 
  -3   2  17   35.14    1.58 
  -3  -2 -17   33.22    1.24 
  -3  -2 -17   34.66    1.40 
  -3  -2 -17   33.78    1.28 
  -3  -2 -17   33.94    1.28 
  -3  -2 -17   34.69    1.20 
  -3   2  17   33.49    1.29 
  -3  -2 -17   34.67    1.36 
  -3   2 -17   36.32    1.38 
   3  -2 -17   35.83    1.66 
  -3   2 -17   36.55    1.38 
  -3  -2  17   36.13    1.41 
  -3  -2  17   34.89    1.46 
  -3   2 -17   34.84    1.47 
  -3   2 -17   34.95    1.43 
  -3   2 -17   35.50    1.34 
  -3   2 -17   35.64    1.43 
  -3   2 -17   36.22    1.34 
  -3  -2  17   37.24    1.37 
  -3  -2  17   34.41    1.39 
  -4   2  17    3.34    0.30 
  -4   2  17    3.37    0.27 
  -4   2  17    3.16    0.35 
  -4  -2 -17    3.60    0.24 
  -4   2  17    3.34    0.28 
  -4   2 -17    3.29    0.33 
  -4  -2  17    3.82    0.29 
  -4   2 -17    3.81    0.28 
  -4  -2  17    3.61    0.32 
  -4   2 -17    3.45    0.31 
  -4  -2  17    3.88    0.28 
  -4   2 -17    3.52    0.27 
   4  -2 -17    3.46    0.50 
  -5   2  17    4.23    0.34 
  -5   2  17    4.08    0.22 
  -5  -2 -17    3.83    0.24 
  -5   2  17    4.42    0.30 
  -5   2  17    4.24    0.26 
  -5   2 -17    3.53    0.22 
   5  -2 -17    3.66    0.46 
  -5  -2  17    3.70    0.25 
  -5  -2  17    3.83    0.28 
   0  -3 -17   27.83    1.26 
   0  -3 -17   28.11    1.11 
   0   3 -17   28.13    1.15 
   0  -3  17   29.13    1.23 
   0  -3 -17   30.11    1.19 
   0  -3 -17   29.61    1.22 
   0   3  17   29.41    1.49 
   0  -3 -17   29.92    1.14 
   0  -3 -17   28.79    1.26 
   0  -3 -17   28.39    1.18 
   0  -3 -17   28.49    1.46 
   0  -3 -17   30.25    1.08 
   0   3 -17   28.70    1.32 
   0  -3  17   28.83    1.28 
   1  -3  17    0.96    0.40 
  -1  -3 -17    0.87    0.27 
  -1  -3 -17    1.18    0.20 
  -1  -3 -17    1.35    0.24 
   1  -3  17    0.94    0.25 
  -1  -3 -17    1.01    0.25 
  -1  -3 -17    1.09    0.20 
  -1  -3 -17    0.96    0.27 
  -1  -3 -17    1.05    0.25 
  -1   3  17    0.94    0.31 
  -1   3  17    0.88    0.28 
  -1   3 -17    2.08    0.37 
   1  -3 -17    1.93    0.22 
  -1   3 -17    1.75    0.49 
  -1   3 -17    2.10    0.32 
  -1   3 -17    2.22    0.28 
  -1  -3  17    2.06    0.24 
  -1   3 -17    1.86    0.22 
   1   3  17    1.77    0.49 
   1  -3 -17    1.87    0.33 
  -1  -3  17    1.77    0.35 
  -1  -3  17    1.83    0.36 
  -1  -3  17    1.81    0.29 
  -1   3 -17    1.85    0.25 
  -2  -3 -17   43.62    1.74 
  -2  -3 -17   41.27    1.60 
  -2  -3 -17   44.17    1.68 
  -2  -3 -17   44.49    1.60 
   2  -3  17   40.61    2.02 
  -2   3  17   44.67    1.73 
  -2  -3 -17   45.12    1.62 
  -2  -3 -17   47.15    1.63 
  -2  -3 -17   43.15    1.67 
  -2   3  17   42.39    1.77 
  -2  -3 -17   44.68    1.59 
  -2   3 -17   44.63    1.72 
  -2   3 -17   46.63    1.85 
  -2  -3  17   44.82    1.62 
  -2  -3  17   46.42    1.85 
  -2   3 -17   44.97    1.71 
  -2  -3  17   45.82    1.61 
  -2  -3  17   47.30    1.72 
  -2  -3  17   46.67    1.98 
  -2   3 -17   48.59    1.83 
  -3   3  17   47.43    1.74 
  -3  -3 -17   46.20    1.79 
   3  -3  17   47.77    2.22 
  -3   3  17   51.91    2.01 
  -3  -3 -17   48.92    1.78 
  -3  -3 -17   48.55    1.72 
  -3   3  17   49.02    1.68 
  -3   3  17   49.69    1.87 
  -3  -3 -17   47.05    1.74 
  -3  -3  17   47.54    1.75 
  -3   3 -17   46.50    1.83 
  -3   3 -17   46.16    1.71 
  -3  -3  17   48.07    1.77 
  -3   3 -17   48.98    1.73 
  -3   3 -17   47.24    1.79 
  -3  -3  17   48.29    1.84 
  -3   3 -17   46.65    1.81 
  -3   3 -17   46.49    1.74 
  -3   3 -17   49.03    1.83 
  -4   3  17    8.58    0.44 
  -4  -3 -17    8.58    0.38 
  -4   3  17    8.16    0.50 
   4  -3  17    8.96    0.76 
  -4  -3 -17    7.43    0.38 
  -4   3  17    8.46    0.41 
  -4   3  17    8.83    0.45 
  -4  -3  17    8.64    0.44 
  -4   3 -17    8.79    0.43 
   4  -3 -17    8.00    0.56 
  -4  -3  17    8.11    0.39 
  -4   3 -17    8.39    0.43 
  -4   3 -17    8.04    0.44 
  -4   3 -17    8.96    0.50 
  -5   3  17    5.35    0.29 
   5  -3  17    3.89    0.64 
  -5   3  17    4.95    0.32 
  -5   3  17    5.48    0.23 
  -5   3  17    5.79    0.28 
   5  -3 -17    6.17    0.42 
  -5   3 -17    6.01    0.28 
  -5   3 -17    6.12    0.36 
  -5  -3  17    6.12    0.31 
   0   4  17    1.95    0.44 
   0  -4 -17    2.39    0.22 
   0  -4 -17    2.14    0.28 
   0  -4 -17    2.23    0.28 
   0  -4 -17    2.00    0.24 
   0  -4 -17    2.29    0.32 
   0  -4 -17    1.95    0.15 
   0   4 -17    2.04    0.34 
   1  -4  17   14.20    0.71 
  -1  -4 -17   14.28    0.67 
  -1  -4 -17   13.17    0.62 
  -1  -4 -17   14.32    0.60 
   1  -4  17   16.23    1.07 
  -1  -4 -17   13.87    0.71 
   1  -4  17   14.27    0.81 
  -1  -4 -17   13.52    0.68 
  -1  -4 -17   13.86    0.65 
   1  -4 -17   13.02    0.71 
  -1   4 -17   12.72    0.62 
  -1  -4  17   11.92    0.97 
   1  -4 -17   12.88    0.58 
   1  -4 -17   12.49    0.55 
   1  -4 -17   12.96    0.70 
   1  -4 -17   11.81    0.56 
  -1   4 -17   13.73    0.62 
  -1  -4  17   12.47    0.60 
  -1   4 -17   12.83    0.87 
  -1  -4  17   12.85    0.55 
  -1   4 -17   12.57    0.72 
  -1   4 -17   13.01    0.54 
   1  -4 -17   12.21    0.94 
  -1  -4  17   11.99    0.66 
  -1  -4  17   12.74    0.72 
   1   4  17   12.54    0.92 
  -2   4  17   49.57    1.84 
  -2  -4 -17   47.66    1.71 
  -2  -4 -17   48.10    1.74 
  -2  -4 -17   47.57    1.78 
  -2   4  17   48.88    1.89 
  -2  -4 -17   46.18    1.73 
   2  -4  17   49.19    2.08 
   2  -4  17   47.89    1.83 
  -2  -4 -17   48.58    1.74 
  -2  -4 -17   49.44    1.72 
  -2  -4 -17   47.67    1.79 
  -2   4 -17   55.45    2.07 
  -2  -4  17   53.35    1.99 
  -2   4 -17   56.78    2.12 
  -2   4 -17   56.50    2.00 
  -2  -4  17   57.05    2.12 
  -2   4 -17   51.53    1.97 
  -3  -4 -17   31.42    1.22 
   3  -4  17   32.54    1.51 
  -3   4  17   31.92    1.17 
  -3   4  17   30.25    1.25 
  -3  -4 -17   31.40    1.17 
  -3  -4 -17   31.66    1.16 
  -3  -4  17   26.69    1.07 
  -3  -4  17   27.70    1.08 
  -3   4 -17   26.23    1.11 
  -3   4 -17   29.35    1.08 
  -3   4 -17   27.45    1.05 
  -3  -4  17   29.04    1.16 
  -3   4 -17   27.96    1.15 
   4  -4  17   46.22    1.92 
  -4   4  17   44.21    1.68 
  -4   4  17   46.74    1.62 
  -4   4  17   47.23    1.65 
  -4  -4 -17   45.00    1.58 
  -4   4 -17   38.85    1.49 
  -4  -4  17   41.99    1.42 
  -4  -4  17   44.56    1.51 
  -4   4 -17   43.14    1.57 
  -4   4 -17   41.15    1.53 
  -4   4 -17   43.16    1.51 
   0  -5 -17   54.24    1.94 
   0   5  17   54.37    2.13 
   0  -5  17   53.44    2.04 
   0  -5 -17   55.23    2.05 
   0  -5 -17   54.84    1.98 
  -1  -5 -17    5.15    0.32 
  -1  -5 -17    5.51    0.39 
  -1  -5 -17    5.00    0.29 
  -1  -5 -17    4.99    0.36 
  -1  -5 -17    5.36    0.34 
  -1   5 -17    5.71    0.45 
   1  -5 -17    5.67    0.33 
  -1   5 -17    5.95    0.49 
   1  -5 -17    5.53    0.45 
  -1  -5  17    5.84    0.35 
  -1  -5  17    5.67    0.46 
  -1   5 -17    5.81    0.35 
   1  -5 -17    5.99    0.43 
  -1  -5  17    5.58    0.45 
   1   5  17    5.95    0.59 
  -2  -5 -17   43.53    1.56 
  -2  -5 -17   42.85    1.58 
  -2   5  17   44.39    2.02 
  -2  -5 -17   42.13    1.50 
  -2  -5 -17   46.45    1.64 
  -2  -5 -17   45.08    1.58 
   2  -5  17   45.02    1.70 
  -2  -5  17   49.39    1.81 
   2  -5 -17   44.86    1.79 
   2  -5 -17   43.56    2.06 
   2   5  17   51.58    2.09 
  -2   5 -17   47.43    1.81 
  -2  -5  17   49.01    1.72 
  -2   5 -17   47.28    1.78 
  -2   5 -17   48.46    1.72 
   3  -5  17    9.51    0.47 
  -3  -5 -17    8.92    0.40 
   3  -5  17    8.82    0.54 
   3  -5  17    9.25    0.55 
  -3  -5 -17    8.73    0.44 
  -3  -5  17    9.46    0.43 
  -3   5 -17    9.57    0.44 
  -3  -5  17    9.35    0.48 
  -3   5 -17    9.15    0.42 
  -3  -5  17    9.46    0.44 
  -3   5 -17    9.86    0.49 
  -3   5 -17    9.24    0.48 
   0   6 -17    1.47    0.36 
   0  -6 -17    1.52    0.22 
   0  -6 -17    1.33    0.18 
   0  -6  17    1.80    0.29 
   0  -6 -17    1.44    0.24 
   0  -6  17    1.68    0.28 
   0  -6 -17    1.85    0.22 
   1  -6  17    3.14    0.29 
   1  -6  17    3.23    0.73 
  -1  -6 -17    2.65    0.22 
  -1  -6 -17    2.74    0.19 
  -1  -6 -17    2.79    0.26 
  -1  -6 -17    2.52    0.24 
   1  -6 -17    5.71    0.39 
  -1  -6  17    5.54    0.40 
  -1   6 -17    5.54    0.40 
   1   6  17    5.54    0.43 
   2  -6  17    5.75    0.40 
  -2   6  17    6.10    0.42 
  -2  -6 -17    6.20    0.30 
  -2  -6 -17    6.27    0.35 
  -2  -6 -17    5.82    0.30 
  -2   6 -17    5.65    0.37 
  -2  -6  17    5.57    0.30 
   2   6  17    5.27    0.43 
  -2  -6  17    5.37    0.31 
   2  -6 -17    5.66    0.36 
  -2  -6  17    5.92    0.36 
  -2   6 -17    5.29    0.30 
  -2   6 -17    5.49    0.32 
   0   0 -18    0.99    0.26 
   0   0 -18    1.19    0.25 
   0   0 -18    1.16    0.31 
   0   0  18    1.00    0.27 
   0   0 -18    0.60    0.19 
   0   0 -18    2.06    0.26 
   0   0  18    1.66    0.42 
   0   0 -18    0.70    0.23 
   0   0 -18    0.81    0.21 
  -1   0 -18  113.43    4.09 
  -1   0 -18  120.44    4.04 
  -1   0 -18  110.68    3.89 
  -1   0 -18  117.93    4.13 
   1   0  18  113.20    4.09 
   1   0 -18  117.68    4.13 
   1   0  18  117.48    4.55 
  -1   0  18  115.42    4.07 
  -1   0 -18  111.68    4.15 
  -1   0  18  113.51    4.07 
  -1   0 -18  119.82    4.17 
  -1   0 -18  115.99    4.18 
  -1   0 -18  120.82    4.04 
   1   0 -18  116.84    4.14 
  -2   0  18    3.94    0.39 
  -2   0 -18    4.04    0.38 
  -2   0 -18    3.71    0.38 
  -2   0  18    3.93    0.32 
  -2   0 -18    3.38    0.32 
  -2   0 -18    3.45    0.32 
   2   0 -18    3.55    0.55 
  -2   0  18    3.84    0.30 
   2   0 -18    4.05    0.37 
  -2   0 -18    3.71    0.39 
   2   0  18    3.59    0.37 
  -2   0 -18    3.57    0.38 
   2   0  18    3.28    0.62 
  -2   0 -18    3.60    0.29 
  -2   0  18    3.95    0.39 
  -2   0  18    3.42    0.36 
  -3   0 -18   37.07    1.51 
  -3   0 -18   38.97    1.36 
  -3   0 -18   37.51    1.41 
  -3   0  18   39.06    1.42 
  -3   0 -18   35.79    1.37 
  -3   0 -18   37.37    1.48 
  -3   0  18   36.71    1.50 
  -3   0  18   38.38    1.47 
  -3   0 -18   35.02    1.40 
  -3   0 -18   38.33    1.50 
  -4   0 -18    5.78    0.32 
  -4   0  18    5.86    0.39 
  -4   0  18    5.01    0.35 
  -4   0 -18    5.11    0.37 
  -4   0  18    5.85    0.42 
  -4   0  18    5.34    0.33 
  -4   0  18    5.89    0.34 
  -5   0 -18    9.91    0.40 
  -5   0  18    9.57    0.49 
  -5   0  18   10.58    0.50 
   5   0 -18   10.78    0.68 
  -5   0  18   11.18    0.49 
  -5   0  18   10.11    0.45 
   0  -1 -18   44.58    2.12 
   0  -1  18   44.95    1.72 
   0   1 -18   43.82    1.79 
   0  -1 -18   42.74    1.66 
   0  -1 -18   42.56    1.76 
   0  -1 -18   42.55    1.64 
   0   1  18   41.36    1.66 
   0   1 -18   44.80    1.63 
   0   1 -18   41.23    1.71 
   0  -1 -18   44.64    1.75 
   0   1 -18   42.56    1.68 
   0  -1 -18   42.72    1.72 
   0  -1 -18   40.25    1.60 
   0  -1  18   42.65    1.88 
   0   1 -18   42.40    1.72 
   0  -1 -18   43.44    1.58 
   0   1  18   43.19    1.97 
  -1  -1 -18    1.46    0.27 
  -1  -1 -18    1.17    0.17 
  -1  -1 -18    1.33    0.25 
  -1  -1 -18    1.50    0.22 
  -1  -1 -18    1.49    0.32 
  -1   1  18    1.39    0.27 
  -1   1  18    1.33    0.29 
  -1  -1 -18    1.35    0.27 
  -1  -1 -18    1.19    0.28 
   1  -1  18    1.20    0.46 
   1  -1  18    1.74    0.32 
  -1  -1  18    0.86    0.25 
   1  -1 -18    1.13    0.26 
   1  -1 -18    0.82    0.24 
  -1   1 -18    1.39    0.26 
   1  -1 -18    0.72    0.32 
   1   1  18    0.95    0.47 
  -1   1 -18    0.69    0.35 
  -1   1 -18    1.09    0.28 
  -1   1 -18    1.06    0.31 
  -1   1 -18    1.25    0.28 
  -1   1 -18    0.64    0.21 
  -1   1 -18    0.81    0.23 
  -1   1 -18    0.78    0.15 
   2  -1  18   24.66    1.46 
  -2   1  18   25.50    0.99 
  -2  -1 -18   23.79    1.05 
  -2  -1 -18   23.79    0.94 
  -2  -1 -18   24.71    0.99 
   2  -1  18   24.36    1.08 
  -2  -1 -18   24.72    1.10 
  -2   1  18   24.30    1.10 
  -2  -1 -18   24.97    1.01 
  -2  -1 -18   24.71    1.00 
  -2  -1 -18   25.02    1.08 
  -2   1  18   24.97    1.12 
  -2  -1 -18   23.05    1.06 
  -2   1  18   24.78    1.05 
  -2  -1 -18   25.18    1.10 
  -2   1 -18   25.24    1.00 
  -2   1 -18   23.99    1.07 
  -2   1 -18   25.20    1.02 
  -2   1 -18   23.62    1.05 
  -2  -1  18   23.59    1.05 
  -2  -1  18   25.18    1.01 
  -2  -1  18   23.47    1.41 
  -2  -1  18   23.93    1.13 
  -2   1 -18   25.55    1.13 
   2  -1 -18   23.95    1.05 
  -2  -1  18   23.96    0.94 
  -2   1 -18   24.69    1.03 
  -2  -1  18   24.19    1.05 
  -2   1 -18   24.41    1.10 
  -3  -1 -18   22.99    0.83 
  -3  -1 -18   20.79    0.97 
  -3  -1 -18   22.54    0.90 
  -3   1  18   22.35    0.90 
  -3  -1 -18   22.34    0.97 
   3  -1  18   22.27    0.98 
  -3   1  18   21.14    0.77 
  -3  -1 -18   22.78    0.90 
  -3   1  18   22.07    0.94 
  -3   1  18   21.65    0.95 
  -3  -1 -18   22.15    0.86 
  -3   1  18   22.46    1.01 
  -3   1 -18   20.17    0.87 
  -3   1 -18   20.91    0.91 
  -3   1 -18   21.06    0.83 
  -3  -1  18   21.10    0.92 
   3  -1 -18   20.94    1.10 
  -3   1 -18   22.01    0.87 
  -3  -1  18   20.77    0.92 
  -3   1 -18   18.99    0.89 
  -3   1 -18   20.54    0.92 
  -3  -1  18   20.57    0.87 
  -3   1 -18   21.10    0.83 
  -3   1 -18   21.45    0.97 
  -4  -1 -18   17.95    0.68 
  -4   1  18   16.04    0.74 
  -4   1  18   17.67    0.73 
  -4   1  18   17.47    0.82 
   4  -1  18   16.78    0.76 
  -4   1  18   17.63    0.72 
  -4  -1 -18   16.79    0.74 
  -4   1  18   17.33    0.76 
   4  -1 -18   18.38    1.01 
  -4   1 -18   17.75    0.78 
  -4  -1  18   18.21    0.80 
  -4  -1  18   19.39    0.80 
  -4  -1  18   17.56    0.75 
  -4  -1  18   18.43    0.75 
  -4   1 -18   18.57    0.75 
  -4   1 -18   18.34    0.83 
  -5   1  18    1.50    0.17 
  -5  -1 -18    1.34    0.11 
  -5   1  18    1.14    0.22 
  -5   1  18    1.27    0.18 
  -5   1  18    1.56    0.19 
  -5   1  18    1.25    0.19 
  -5  -1  18    0.32    0.10 
  -5   1 -18    0.33    0.10 
  -5  -1  18    0.35    0.13 
  -5  -1  18    0.58    0.17 
   5  -1 -18    0.37    0.27 
   0  -2 -18    7.03    0.37 
   0  -2 -18    6.83    0.53 
   0   2 -18    6.84    0.49 
   0  -2  18    6.70    0.47 
   0  -2 -18    7.23    0.50 
   0  -2 -18    6.29    0.43 
   0  -2 -18    6.34    0.39 
   0   2  18    6.46    0.65 
   0  -2  18    7.17    0.55 
   0   2 -18    6.95    0.44 
   0  -2 -18    6.05    0.42 
   0  -2 -18    6.90    0.65 
   0   2 -18    7.05    0.57 
   0  -2 -18    6.59    0.48 
  -1  -2 -18   32.62    1.28 
  -1  -2 -18   33.20    1.27 
  -1   2  18   33.68    1.40 
  -1   2  18   33.20    1.38 
  -1  -2 -18   32.02    1.32 
  -1  -2 -18   33.70    1.23 
   1  -2  18   33.93    1.38 
   1  -2  18   31.93    1.61 
  -1  -2 -18   31.20    1.36 
  -1  -2 -18   31.52    1.35 
  -1  -2 -18   32.55    1.37 
  -1   2 -18   32.51    1.40 
  -1   2 -18   32.31    1.34 
  -1  -2  18   31.79    1.39 
  -1   2 -18   30.87    1.24 
   1  -2 -18   30.20    1.19 
   1   2  18   31.74    1.67 
   1  -2 -18   31.85    1.36 
  -1  -2  18   31.68    1.28 
  -1  -2  18   31.05    1.39 
   1  -2 -18   30.21    1.34 
  -1   2 -18   31.52    1.46 
   1  -2 -18   30.45    1.29 
  -1   2 -18   30.36    1.12 
  -1   2 -18   30.14    1.23 
  -1   2 -18   30.11    1.29 
  -2  -2 -18   10.99    0.54 
  -2   2  18   10.41    0.63 
  -2  -2 -18   10.35    0.61 
   2  -2  18   11.55    0.90 
  -2   2  18   11.12    0.57 
  -2  -2 -18   10.94    0.53 
  -2  -2 -18   10.70    0.59 
   2  -2  18   10.78    0.63 
  -2  -2 -18   10.90    0.49 
  -2  -2 -18   11.20    0.54 
  -2   2  18   11.04    0.65 
  -2  -2 -18   10.93    0.61 
  -2  -2 -18   10.97    0.59 
  -2  -2 -18   11.21    0.54 
  -2  -2  18    9.33    0.51 
  -2  -2  18   10.07    0.44 
  -2  -2  18   10.43    0.64 
  -2   2 -18   10.34    0.61 
  -2   2 -18    9.71    0.53 
  -2  -2  18   10.08    0.79 
  -2   2 -18    9.99    0.54 
  -2   2 -18    9.69    0.52 
  -2   2 -18   10.51    0.62 
  -2  -2  18    9.76    0.56 
  -2  -2  18    9.97    0.50 
  -2   2 -18   10.49    0.63 
  -3   2  18    1.36    0.21 
  -3   2  18    1.36    0.22 
  -3   2  18    1.15    0.22 
  -3  -2 -18    1.56    0.25 
  -3  -2 -18    1.61    0.15 
  -3  -2 -18    1.94    0.27 
  -3  -2 -18    1.31    0.17 
  -3  -2 -18    1.40    0.20 
  -3  -2 -18    1.46    0.21 
  -3   2  18    1.35    0.30 
  -3   2  18    1.27    0.12 
   3  -2  18    1.34    0.48 
  -3  -2  18    1.34    0.24 
  -3  -2  18    1.13    0.23 
  -3   2 -18    1.54    0.22 
  -3   2 -18    1.30    0.18 
  -3   2 -18    1.25    0.28 
  -3   2 -18    1.56    0.26 
  -3   2 -18    1.42    0.22 
  -3   2 -18    1.32    0.23 
  -3  -2  18    1.11    0.24 
  -3   2 -18    1.39    0.26 
  -4  -2 -18   26.99    1.04 
  -4   2  18   22.04    0.90 
  -4   2  18   21.90    0.97 
  -4  -2 -18   23.32    0.86 
  -4   2  18   22.05    0.91 
  -4   2  18   21.71    0.87 
  -4   2 -18   28.62    1.06 
  -4   2 -18   28.07    1.07 
  -4   2 -18   28.01    1.11 
  -4  -2  18   28.90    1.08 
  -4   2 -18   28.65    1.16 
  -4  -2  18   27.98    1.11 
   4  -2 -18   28.98    1.25 
  -4  -2  18   28.86    1.06 
  -5   2  18    1.64    0.22 
  -5   2  18    2.29    0.18 
  -5   2  18    2.33    0.20 
   5  -2  18    2.48    0.26 
  -5  -2  18    2.11    0.24 
  -5  -2  18    2.66    0.20 
  -5   2 -18    2.28    0.15 
   0  -3  18   49.88    1.82 
   0   3 -18   50.93    2.02 
   0  -3  18   51.06    1.92 
   0  -3 -18   52.38    1.81 
   0  -3 -18   49.27    1.95 
   0   3  18   49.61    2.14 
   0  -3 -18   51.69    1.93 
   0  -3 -18   49.71    1.74 
   0  -3 -18   49.48    1.87 
   0  -3 -18   50.49    1.97 
   0  -3 -18   49.43    1.83 
   0  -3 -18   50.42    1.97
[truncated: 36,786 more chars]
